# Supplementary material for: Generating Fischer-Type Rh-Carbenes with Rh-Carbynoids
Source: PubMed Central journal article supplement — J Am Chem Soc. 2023 Feb 22;145(9):4975–81. doi: 10.1021/jacs.3c00012 (PMC9999426; doi:10.1021/jacs.3c00012), 2023-02-22

# Generating Fischer-type Rh-carbenes with Rh-carbynoids

Eric Palomo<sup>‡†</sup>, Akhilesh K. Sharma<sup>‡</sup>, Zhaofeng Wang<sup>‡</sup>, Liyin Jiang<sup>‡</sup>, Feliu Maseras<sup>‡\*</sup> and  
Marcos G. Suero<sup>‡\*</sup>

*‡Institute of Chemical Research of Catalonia (ICIQ), The Barcelona Institute of Science and Technology, Països Catalans 16, 43007 Tarragona, Spain. †Departament de Química Analítica i Química Orgànica, Universitat Rovira i Virgili, Calle Marcel·lí Domingo, 1, Tarragona, 43007, Spain*

\*Correspondence to [fmaseras@iciq.es](mailto:fmaseras@iciq.es) and [mgsuero@iciq.es](mailto:mgsuero@iciq.es)

## Supporting Information

# Table of Contents

|                                                                                   |      |
|-----------------------------------------------------------------------------------|------|
| 1. General information.                                                           | S1   |
| 2. Synthesis of diazo compounds <b>2</b> .                                        | S2   |
| 3. General procedure A for the synthesis of 4-pentenoic acids <b>1</b> .          | S5   |
| 4. General procedure B for the reaction optimization.                             | S13  |
| 5. Control experiments.                                                           | S16  |
| 6. General procedure C for the synthesis of cyclopropyl-fused lactones <b>3</b> . | S17  |
| 7. General procedure D for optimization of intramolecular reaction.               | S32  |
| 8. Derivatizations of compound <b>3a</b> .                                        | S34  |
| 9. X-Ray crystal data of <b>3t</b> and <b>3y</b> .                                | S36  |
| 10. Computational details.                                                        | S39  |
| 11. References.                                                                   | S120 |
| 12. NMR spectra.                                                                  | S124 |

## 1. General information.

All reagents were used as purchased with no further purification. Rhodium(II) acetate dimer  $\text{Rh}_2(\text{OAc})_4$ , and bis[rhodium( $\alpha,\alpha',\alpha',\alpha'$ -tetramethyl-1,3-benzenedipropionic acid)]  $\text{Rh}_2(\text{esp})_2$  were purchased from Sigma-Aldrich. Rhodium bis(1-adamantate) dimer  $\text{Rh}_2(\text{Adc})_4$  and rhodium(II) triphenylacetate dimer  $\text{Rh}_2(\text{TPA})_4$  were prepared according to reported procedures<sup>1,2</sup>. Ethyl diazoacetate, ( $\geq 13$  wt. % dichloromethane) was purchased from Aldrich (Ref. E22201) and used without further purification. Anhydrous solvents were dried by passing through an activated alumina column on a PureSolv™ solvent purification system (Innovative Technologies, Inc., MA). Analytical thin layer chromatography (TLC) was carried out using aluminum sheets with 0.2 mm of silica gel (Merck GF234). Visualization of the developed chromatogram was performed by irradiation with UV light or treatment with a solution of potassium permanganate or vanillin stain followed by heating. Flash column chromatography was performed on silica gel (Aldrich, 230-400 mesh). Organic solutions were concentrated under reduced pressure on a Büchi rotatory evaporator. Unless otherwise stated, reactions were carried out under argon atmosphere. Yields refer to purified compounds unless otherwise noted. NMR spectra were recorded at 298 K on Bruker Avance 300, Bruker Avance 400 Ultrashield or Bruker Avance 500 Ultrashield apparatuses. Coupling constants ( $J$ ) are quoted in hertz (Hz). Multiplicity is reported with the following abbreviations: s = singlet, brs = broad singlet, d = doublet, t = triplet, q = quartet, dt = doublet of triplets, td = triplet of doublets, tt = triplet of triplets, sp = septet, m = multiplet, app = apparent. Melting points were measured using open glass capillaries in a Büchi B540 apparatus. Infrared spectra were recorded on a Bruker Tensor 27. Mass spectra were recorded on a Waters LCT Premier spectrometer. Gas chromatography-mass spectrometry (GC-MS) was carried out in Agilent 7890B - 5877A MSD.

## 2. Synthesis of diazo compounds 2

- Hypervalent iodine reagents **2a-e** are known compounds and were prepared following the reported literature protocols.<sup>3,4</sup>

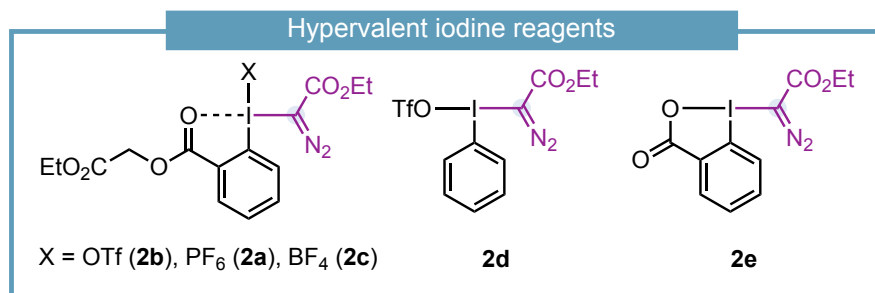

Figure S1. Pseudo-cyclic, linear, and cyclic hypervalent iodine reagents **2a-e**.

### (1-Diazo-2-ethoxy-2-oxoethyl)(2-(2-ethoxy-2-oxoethoxy)carbonylphenyl)iodonium trifluoromethanesulfonate (**2b**)<sup>3</sup>

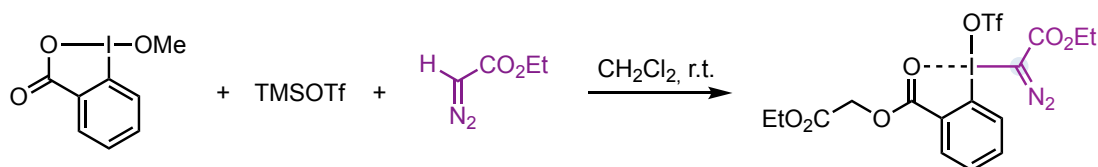

A solution of 1-methoxy-1,2-benzodioxol-3(1H)-one (4.0 g, 14.38 mmol, 1.0 equiv.) in dichloromethane (0.5 M) was treated with trimethylsilyl trifluoromethanesulfonate (2.6 mL, 14.38 mmol, 1.0 equiv.) at room temperature. After 30 minutes, a cloudy suspension was observed and then ethyl diazoacetate (3.3 mL, 31.64 mmol, 2.2 equiv.) was added dropwise for 15 minutes. Nitrogen evolution was observed, and the resulting reaction mixture was stirred at room temperature until a clear yellow solution was observed (usually 3 hours). Solvent was removed under vacuum and the crude was recrystallized from a mixture of diethyl ether/dichloromethane (5/1) during 12 hours at -30 °C (Note: the recrystallization process may be repeated if impurities are observed). The desired product was collected by filtration, washed with cold diethyl ether (500 mL), dried under high *vacuum*, and stored at -30 °C. The title compound was isolated as a yellow solid (8.2 g, 96 %).

<sup>1</sup>H NMR (400 MHz, DMSO-d<sub>6</sub>) δ 8.38 (dd, *J* = 7.5, 1.9 Hz, 1H), 8.32 (dd, *J* = 8.0, 1.2 Hz, 1H), 8.00 (td, *J* = 7.7, 1.9 Hz, 1H), 7.95 (td, *J* = 7.4, 1.3 Hz, 1H), 5.15 (s, 2H), 4.30 – 4.19 (m, 4H), 1.26 – 1.19 (m, 6H);

$^{13}\text{C}$  NMR (101 MHz, DMSO- $d_6$ )  $\delta$  167.4, 166.8, 161.6, 137.7, 133.4, 132.7, 132.7, 126.3, 120.7 (q,  $J$  = 324.2 Hz), 117.8, 63.7, 63.5, 61.5, 14.1, 14.0;

The data are consistent with that reported previously.

**(1-Diazo-2-ethoxy-2-oxoethyl)(2-(2-ethoxy-2-oxoethoxy)carbonylphenyl)iodonium hexafluorophosphate (**2a**)<sup>4</sup>**

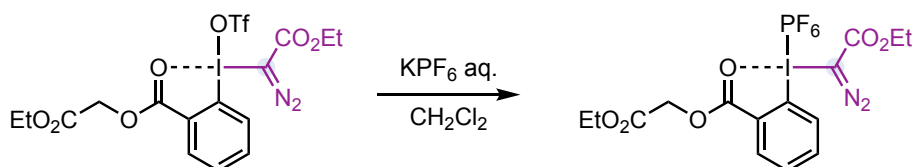

To a 50 mL round bottom flask equipped with a stirring bar, 10.0 mL of saturated aqueous solution of sodium hexafluorophosphate and 10.0 mL of **2a** (2.98 g, 5 mmol) in dichloromethane (0.5 M) were added. The resulting biphasic mixture was stirred vigorously at room temperature for 10 minutes. The phases were separated, and the aqueous layer was extracted with dichloromethane (3 x 10 mL). The combined organic fractions were dried over anhydrous  $\text{MgSO}_4$  and concentrated under *vacuum* to give the **2b** as a yellow solid (2.1 g, 70% yield).

**IR** (film,  $\text{cm}^{-1}$ ): 2988, 2121, 1752, 1703, 1660, 1589, 1330, 1271, 1220, 1152, 1029, 837;

$^1\text{H}$  NMR (400 MHz,  $\text{CD}_3\text{CN}$ )  $\delta$  8.45 – 8.40 (m, 1H), 8.06 – 8.01 (m, 2H), 7.93 (ddd,  $J$  = 7.6, 5.7, 2.6 Hz, 1H), 5.07 (s, 2H), 4.35 (q,  $J$  = 7.1 Hz, 2H), 4.26 (q,  $J$  = 7.1 Hz, 2H), 1.28 (t,  $J$  = 7.1 Hz, 7H);

$^{13}\text{C}$  NMR (101 MHz,  $\text{CD}_3\text{CN}$ )  $\delta$  170.7, 167.2, 162.0, 139.5, 134.3, 133.5, 130.3, 126.1, 116.7, 65.4, 65.2, 62.9, 14.5, 14.4;

$^{19}\text{F}$  NMR (376 MHz,  $\text{CD}_2\text{Cl}_2$ )  $\delta$  -72.8 (d,  $J$  = 706.9 Hz);

$^{31}\text{P}$  NMR (162 MHz,  $\text{CDCl}_3$ )  $\delta$  -141.4 (sp,  $J$  = 714.4 Hz);

**HRMS** (MALDI) calculated for  $\text{C}_{15}\text{H}_{16}\text{IN}_2\text{O}_6^+$  [ $\text{M-PF}_6$ ]<sup>+</sup>  $m/z$ : 447.0053, found: 447.0036.

•  $\alpha$ -onium diazoesters **2f,g** and bromo diazoacetate **2h** have been prepared according to the literature procedure by Weiss<sup>4</sup> and Bonge-Hansen.<sup>5</sup>

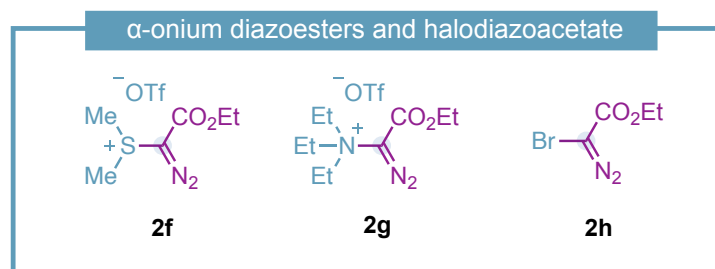

**Figure S2.** α-onium diazoesters and ethyl bromodiazoacetate

### (1-Diazo-2-ethoxy-2-oxoethyl)dimethylsulfonium triflate (**2f**)<sup>4</sup>

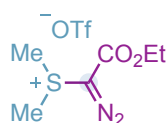

**2d** (0.621 g, 1.17 mmol, 1.0 equiv.) was dissolved in dry dichloromethane (15 mL) at 0 °C. To this solution was added dimethyl sulfide (0.215 mL, 0.182 g, 2.93 mmol, 2.5 equiv.) with stirring. The mixture turned into a clear solution and was stirred at 0 °C for 1 h and then concentrated in vacuo at 20 °C. The title compound was isolated by recrystallization from diethyl ether at -30°C overnight as a white solid (200.9 mg, 98% yield).

<sup>1</sup>H NMR (400 MHz, CDCl<sub>3</sub>): δ 4.35 (q, *J* = 7.1 Hz, 2H), 3.32 (s, 6H), 1.34 (t, *J* = 7.1 Hz, 3H);

<sup>13</sup>C NMR (101 MHz, CDCl<sub>3</sub>): δ = 160.4, 120.3, 63.4, 26.6, 14.0;

The data are consistent with that reported previously.

### 1-Diazo-2-ethoxy-*N,N,N*-triethyl-2-oxoethanaminium triflate (**2g**)<sup>4</sup>

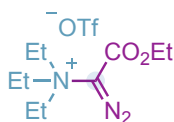

**2d** (0.487 g, 0.91 mmol, 1.0 equiv.) was dissolved in dry dichloromethane (15 mL) at 0 °C. To this solution was added triethylamine (0.134 mL, 0.097 g, 1.05 mmol, 1.05 equiv.). The mixture was stirred at 0 °C for 1 h and then concentrated in vacuo at 20 °C. The title compound was isolated by recrystallization from diethyl ether at -30°C overnight as a sticky yellow solid (165.3 mg, 50% yield).

<sup>1</sup>H NMR (400 MHz, CDCl<sub>3</sub>): δ 4.35 (q, *J* = 7.1 Hz, 2H), 3.86 (q, *J* = 7.1 Hz, 6H), 1.44 (t, *J* = 7.1 Hz, 9H), 1.34 (t, *J* = 7.1 Hz, 3H);

$^{13}\text{C}$  NMR (101 MHz,  $\text{CDCl}_3$ ):  $\delta = 160.0, 120.9, 63.5, 56.4, 14.3, 8.5$ ;

The data are consistent with that reported previously.

### Ethyl 2-bromo-2-diazoacetate (**2h**)<sup>5</sup>

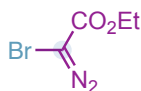

**2d** (46.6 mg, 0.1 mmol, 1.0 equiv.) was dissolved in dry dichloromethane (1 mL) at 0 °C. Tetrabutylammonium bromide (48.3 mg, 0.15 mmol, 1.5 equiv.) was added in one portion. The mixture was stirred at 0 °C for 1 h. The title compound was not isolated and was used directly in the reaction (*General procedure B*).

#### Notes:

- We have never observed any explosion during the preparation or manipulation of reagents **2a-h** at the scales indicated here in our laboratory. For safety precautions we always used an anti-blast shield.
- If impurities are observed after recrystallization, a subsequent recrystallization may be done.
- Reagents **2a-g** were kept at  $\leq -20$  °C.

### 3. General procedure A for the synthesis of 4-pentenoic acids (**1**)<sup>5-11</sup>

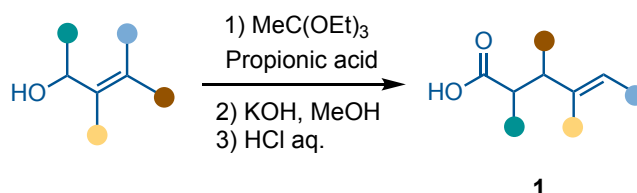

A mixture of propionic acid (75  $\mu\text{L}$ , 1 mmol, 0.1 equiv.), triethyl orthoacetate (18.0 mL, 100.0 mmol, 10 equiv.) and the corresponding allylic alcohol (10.0 mmol, 1 equiv.) was heated at 150 °C for 5 h in a Dean-Stark apparatus. After cooling to room temperature, a solution of KOH (800 mg, 14.3 mmol) in methanol (6.0 mL) was added and the resulting mixture was heated under reflux for 3 h. After this, the solvent was then evaporated under *vacuum* and the residue was dissolved in distilled water (6.0 mL). The solution was extracted with diethyl ether (10.0 mL), and the organic phase was discarded. Then the aqueous layer was acidified with 6 M HCl at 0 °C until pH = 1-2. The solution was extracted with  $\text{Et}_2\text{O}$  (3 x 15 mL). The combined organic phases were dried with  $\text{Na}_2\text{SO}_4$ , and the solvent was evaporated under *vacuum*. The product was purified by flash chromatography on silica gel (hexane/ethyl acetate, 10/1 to 5/1).

### 3-Phenylpent-4-enoic acid (1a)<sup>6</sup>

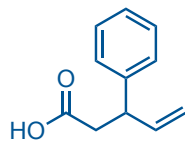

Prepared according to the general procedure A with cinnamyl alcohol (1.3 g, 10 mmol). Flash column chromatography on silica gel provided the title compound as a white solid (1.3 g, 75% yield).

<sup>1</sup>H NMR (400 MHz, CDCl<sub>3</sub>) δ 7.35 – 7.29 (m, 2H), 7.26 – 7.20 (m, 3H), 6.04 – 5.94 (m, 1H), 5.14 – 5.05 (m, 2H), 3.91 – 3.82 (m, 1H), 2.85 – 2.72 (m, 2H);

<sup>13</sup>C NMR (101 MHz, CDCl<sub>3</sub>) δ 178.0, 142.3, 140.1, 128.8, 127.7, 127.0, 115.2, 45.3, 40.0;

The data are consistent with that reported previously.

### 3-(*p*-Tolyl)pent-4-enoic acid (1b)<sup>7</sup>

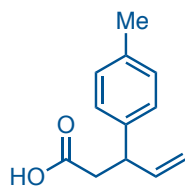

Prepared according to the general procedure A with (*E*)-3-(*p*-tolyl)prop-2-en-1-ol (1.5 g, 10 mmol). Flash column chromatography on silica gel provided the title compound as a white solid (1.7 g, 88% yield).

<sup>1</sup>H NMR (400 MHz, CDCl<sub>3</sub>) δ 7.17 – 7.07 (m, 4H), 5.97 (ddd, *J* = 17.2, 10.1, 6.9 Hz, 1H), 5.10 – 5.05 (m, 2H), 3.83 (m, 1H), 2.84 – 2.67 (m, 2H), 2.32 (s, 3H);

<sup>13</sup>C NMR (101 MHz, CDCl<sub>3</sub>) δ 177.7, 140.3, 139.3, 136.5, 129.5, 127.5, 115.0, 44.9, 40.0, 21.2;

HRMS: (ESI) calculated for C<sub>12</sub>H<sub>13</sub>O<sub>2</sub><sup>-</sup> [M-H]<sup>-</sup> *m/z*: 189.0921, found: 189.0914;

The data are consistent with that reported previously.

### 3-(4-Methoxyphenyl)pent-4-enoic acid (1c)<sup>7</sup>

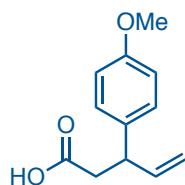



Prepared according to the general procedure A with (*E*)-3-(4-methoxyphenyl)prop-2-en-1-ol (1.6 g, 10 mmol). Flash column chromatography on silica gel provided the title compound as a white solid (1.6 g, 75% yield).

$^1\text{H NMR}$  (400 MHz,  $\text{CDCl}_3$ )  $\delta$  7.18 – 7.07 (m, 2H), 6.90 – 6.79 (m, 2H), 5.96 (ddd,  $J = 17.0, 10.6, 6.8$  Hz, 1H), 5.12 – 5.01 (m, 2H), 3.85 – 3.80 (m, 1H), 3.79 (s, 3H), 2.83 – 2.66 (m, 2H);

$^{13}\text{C NMR}$  (101 MHz,  $\text{CDCl}_3$ )  $\delta$  177.8, 158.5, 140.4, 134.3, 128.6, 114.8, 114.2, 55.4, 44.5, 40.2;

The data are consistent with that reported previously.

### 3-(4-Fluorophenyl)pent-4-enoic acid (**1d**)<sup>8</sup>

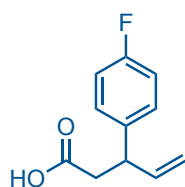

Prepared according to the general procedure A with (*E*)-3-(4-fluorophenyl)prop-2-en-1-ol (1.5 g, 10 mmol). Flash column chromatography on silica gel provided the title compound as a white solid (1.2 g, 60% yield).

$^1\text{H NMR}$  (300 MHz,  $\text{CDCl}_3$ )  $\delta$  7.21 – 7.15 (m, 2H), 7.04 – 6.96 (m, 2H), 6.01 – 5.90 (m, 1H), 5.13 – 5.04 (m, 2H), 3.85 (m, 1H), 2.84 – 2.67 (m, 2H);

$^{13}\text{C NMR}$  (101 MHz,  $\text{CDCl}_3$ )  $\delta$  177.5, 161.9 (d,  $J = 244.7$  Hz), 139.9, 137.9 (d,  $J = 2.9$  Hz), 129.2 (d,  $J = 8.1$  Hz), 115.6 (d,  $J = 21.3$  Hz), 115.3, 44.5, 40.0;

$^{19}\text{F NMR}$  (471 MHz,  $\text{CDCl}_3$ )  $\delta$  -116.5;

The data are consistent with that reported previously.

### 3-(4-Chlorophenyl)pent-4-enoic acid (**1e**)<sup>8</sup>

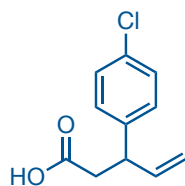

Prepared according to the general procedure A with (*E*)-3-(4-chlorophenyl)prop-2-en-1-ol (1.7 g, 10 mmol). Flash column chromatography on silica gel provided the title compound as a white solid (1.5 g, 72% yield).

**<sup>1</sup>H NMR** (400 MHz, CDCl<sub>3</sub>) δ 7.30 – 7.26 (m, 2H), 7.17 – 7.12 (m, 2H), 5.94 (ddd, *J* = 17.1, 10.4, 6.7 Hz, 1H), 5.13 – 5.04 (m, 2H), 3.88 – 3.80 (m, 1H), 2.84 – 2.66 (m, 2H);

**<sup>13</sup>C NMR** (101 MHz, CDCl<sub>3</sub>) δ 176.8, 140.7, 139.6, 132.8, 129.1, 128.9, 115.6, 44.6, 39.7;

The data are consistent with that reported previously.

### 3-(4-(Trifluoromethyl)phenyl)pent-4-enoic acid (**1f**)<sup>6</sup>

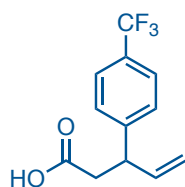

Prepared according to the general procedure A with (*E*)-3-(4-(trifluoromethyl)phenyl)prop-2-en-1-ol (2.0 g, 10 mmol). Flash column chromatography on silica gel provided the title compound as a white solid (1.2 g, 50% yield).

**IR** (cm<sup>-1</sup>): 3089, 3049, 2921, 1712, 1619, 1419, 1326, 1165, 1124, 1069, 1018, 925, 841;

**<sup>1</sup>H NMR** (400 MHz, CDCl<sub>3</sub>) δ 7.57 (dd, *J* = 8.7, 0.7 Hz, 2H), 7.33 (d, *J* = 8.6 Hz, 2H), 5.96 (ddd, *J* = 17.2, 10.4, 6.8 Hz, 1H), 5.17 – 5.06 (m, 2H), 3.97 – 3.87 (m, 1H), 2.87 – 2.71 (m, 2H);

**<sup>13</sup>C NMR** (126 MHz, CDCl<sub>3</sub>) δ 177.1, 146.2, 139.2, 129.3 (q, *J* = 32.6 Hz), 128.1, 125.8 (q, *J* = 3.7 Hz), 124.3 (q, *J* = 272.9 Hz), 116.0, 45.0, 39.6;

**<sup>19</sup>F NMR** (282 MHz, CDCl<sub>3</sub>) δ -62.5;

**HRMS** (ESI): calculated for C<sub>12</sub>H<sub>10</sub>O<sub>2</sub>F<sub>3</sub><sup>-</sup> [M-H]<sup>-</sup> *m/z*: 243.0638, found: 243.0643.

### 3-(*m*-Tolyl)pent-4-enoic acid (**1g**)<sup>6</sup>

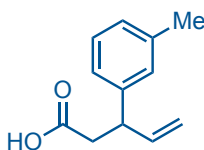

Prepared according to the general procedure A with (*E*)-3-(*m*-tolyl)prop-2-en-1-ol (1.5 g, 10 mmol). Flash column chromatography on silica gel provided the title compound as a white solid (1.3 g, 67% yield).

**IR** (cm<sup>-1</sup>): 3021, 2916, 1708, 1638, 1490, 1415, 1293, 919, 754, 727;

**<sup>1</sup>H NMR** (400 MHz, CDCl<sub>3</sub>) δ 7.23 – 7.18 (m, 1H), 7.07 – 7.00 (m, 3H), 5.98 (ddd, *J* = 17.2, 10.0, 6.9 Hz, 1H), 5.13 – 5.06 (m, 2H), 3.83 (dt, *J* = 8.3, 6.9 Hz, 1H), 2.84 – 2.70 (m, 2H), 2.34 (s, 3H);

**<sup>13</sup>C NMR** (101 MHz, CDCl<sub>3</sub>) δ 178.0, 142.3, 140.2, 138.4, 128.7, 128.4, 127.7, 124.6, 115.1, 45.3, 40.0, 21.6;

**HRMS** (ESI): calculated for C<sub>12</sub>H<sub>13</sub>O<sub>2</sub><sup>-</sup> [M-H]<sup>-</sup> *m/z*: 189.0921, found: 189.0915.

### 3-(*o*-Tolyl)pent-4-enoic acid (**1h**)<sup>6</sup>

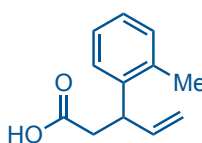

Prepared according to the general procedure A with (*E*)-3-(*o*-tolyl)prop-2-en-1-ol (1.5 g, 10 mmol). Flash column chromatography on silica gel provided the title compound as a white solid (1.2 g, 65% yield).

**IR** (cm<sup>-1</sup>): 2920, 1705, 1606, 1413, 1291, 917, 785, 704;

**<sup>1</sup>H NMR** (300 MHz, CDCl<sub>3</sub>) δ 7.23 – 7.07 (m, 4H), 5.93 (ddd, *J* = 17.1, 10.4, 6.6 Hz, 1H), 5.11 – 4.97 (m, 2H), 4.17 – 4.06 (m, 1H), 2.87 – 2.69 (m, 2H), 2.37 (s, 3H);

**<sup>13</sup>C NMR** (101 MHz, CDCl<sub>3</sub>) δ 178.3, 140.2, 139.7, 136.1, 130.8, 126.7, 126.4, 126.4, 115.1, 40.7, 39.4, 19.6;

**HRMS** (ESI): calculated for C<sub>12</sub>H<sub>13</sub>O<sub>2</sub><sup>-</sup> [M-H]<sup>-</sup> *m/z*: 189.0921, found: 189.0922.

### 3,3-Dimethylpent-4-enoic acid (**1j**)<sup>8</sup>

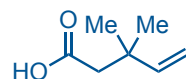

Prepared according to the general procedure A with (*E*)-4-methylpent-2-en-1-ol (1.0 g, 10 mmol). Flash column chromatography on silica gel provided the title compound as a colorless oil (1.2 g, 95% yield).

**<sup>1</sup>H NMR** (300 MHz, CDCl<sub>3</sub>) δ 5.90 (dd, *J* = 17.6, 10.8 Hz, 1H), 5.02 – 4.93 (m, 2H), 2.33 (s, 2H), 1.15 (s, 6H);

**<sup>13</sup>C NMR** (101 MHz, CDCl<sub>3</sub>) δ 178.2, 146.6, 111.3, 46.7, 36.1, 27.0;

The data are consistent with that reported previously.

### 2-(1-Vinylcyclohexyl)acetic acid (**1k**)<sup>8</sup>

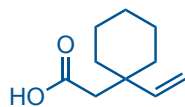

Prepared according to the general procedure A with 2-cyclohexylideneethan-1-ol (1.3 g, 10 mmol). Flash column chromatography on silica gel provided the title compound as a colorless oil (1.3 g, 80% yield).

<sup>1</sup>H NMR (300 MHz, CDCl<sub>3</sub>) δ 5.79 (dd, *J* = 18.1, 11.0 Hz, 1H), 5.14 – 4.99 (m, 2H), 2.35 (s, 2H), 1.70 – 1.38 (m, 10H);

<sup>13</sup>C NMR (101 MHz, CDCl<sub>3</sub>) δ 178.3, 144.7, 113.7, 45.8, 39.3, 35.7, 26.2, 22.2;

The data are consistent with that reported previously.

### 2-(1,3-Dioxo-1,3-dihydro-2*H*-isoindol-2-yl)pent-4-enoic acid (**1m**)<sup>9</sup>

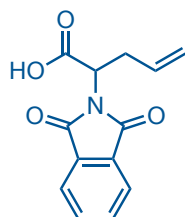

Prepared according to the procedure reported in the literature with 2-aminopent-4-enoic acid (500 mg, 4.34 mmol). Flash column chromatography on silica gel provided the title compound as a white solid (533 mg, 50% yield).

<sup>1</sup>H NMR (400 MHz, CDCl<sub>3</sub>) δ 7.88 – 7.83 (m, 2H), 7.76 – 7.70 (m, 2H), 5.71 (dddd, *J* = 17.0, 10.2, 8.5, 5.7 Hz, 1H), 5.11 – 5.04 (m, 1H), 5.05 – 4.96 (m, 2H), 3.11 – 2.91 (m, 2H);

<sup>13</sup>C NMR (101 MHz, CDCl<sub>3</sub>) δ 174.4, 167.6, 134.4, 133.0, 131.8, 123.8, 119.2, 51.5, 33.1;

The data are consistent with that reported previously.

### (*E*)-Hex-4-enoic acid (**1o**)<sup>6</sup>

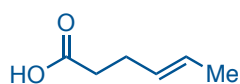

Prepared according to the general procedure A with 3-buten-2-ol (0.7 g, 10 mmol). Flash column chromatography on silica gel provided the title compound as a colorless oil (1.0 g, 95% yield).

**IR** (cm<sup>-1</sup>): 3027, 2920, 2858, 1706, 1436, 1412, 1279, 1248, 1211, 965, 935

**<sup>1</sup>H NMR** (400 MHz, CDCl<sub>3</sub>) δ 5.56 – 5.38 (m, 2H), 2.44 – 2.38 (m, 2H), 2.37 – 2.24 (m, 2H), 1.67 – 1.63 (m, 3H);

**<sup>13</sup>C NMR** (101 MHz, CDCl<sub>3</sub>) δ 179.7, 129.0, 126.6, 34.2, 27.7, 18.0;

**HRMS** (ESI): calculated for C<sub>6</sub>H<sub>9</sub>O<sub>2</sub><sup>-</sup> [M-H]<sup>-</sup> m/z: 113.0608, found: 113.0612.

#### **(Z)-Hex-4-enoic acid (1p)**<sup>10</sup>

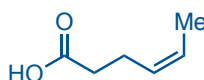

Prepared according to a literature procedure: To a solution of hex-4-ynoic acid (2.0 g, 17.8 mmol, 1.0 eq.) in ethyl acetate (20.0 mL), quinoline (4.2 mL, 35.7 mmol, 2.0 equiv.) and palladium on calcium carbonate (200 mg, Lindlar-catalyst) were added. The reaction flask was carefully evacuated and flushed with hydrogen gas. The procedure was repeated twice and the suspension was vigorously stirred at room temperature for six hours under hydrogen atmosphere. The suspension was filtered over a short pad of celite, washed with ethyl acetate (80.0 mL) and the solution was washed with 1 N NaOH solution (3 x 50.0 mL). The combined aqueous layers were acidified with concentrated HCl aq. solution (pH = 1) and extracted with dichloromethane (3 x 80 mL). The combined organic layers were dried over Na<sub>2</sub>SO<sub>4</sub>, filtered and the solvent was removed in *vacuo*. The residue was purified by column chromatography on silica gel (hexane/ ethyl acetate: 9/1) to afford the title compound as a yellow liquid in 99% yield (2.0 g, 17.6 mmol).

**<sup>1</sup>H NMR** (400 MHz, CDCl<sub>3</sub>) δ 5.57 – 5.47 (m, 1H), 5.42 – 5.33 (m, 1H), 2.45 – 2.34 (m, 4H), 1.63 (ddt, *J* = 6.8, 1.8, 0.8 Hz, 3H);

**<sup>13</sup>C NMR** (101 MHz, CDCl<sub>3</sub>) δ 180.0, 128.1, 125.9, 34.1, 22.3, 12.8;

The data are consistent with that reported previously.

#### **4-Methylpent-4-enoic acid (1q)**<sup>8</sup>

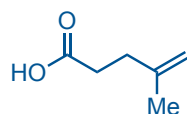

Prepared according to the general procedure A with methallyl alcohol (0.7 g, 10 mmol). Flash column chromatography on silica gel provided the title compound as a colorless oil (0.9 g, 85% yield).

**<sup>1</sup>H NMR** (400 MHz, CDCl<sub>3</sub>) δ 4.77 (dt, *J* = 1.6, 0.7 Hz, 1H), 4.71 (dd, *J* = 1.6, 0.9 Hz, 1H), 2.54 – 2.49 (m, 2H), 2.35 (dd, *J* = 9.1, 6.1 Hz, 2H), 1.78 – 1.73 (m, 3H);

**<sup>13</sup>C NMR** (101 MHz, CDCl<sub>3</sub>) δ 180.1, 143.8, 110.6, 32.6, 32.3, 22.6;

The data are consistent with that reported previously.

### 5-Methylhex-4-enoic acid (**1r**)<sup>11</sup>

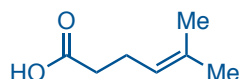

Prepared according to the general procedure A with 2-methylbut-3-en-2-ol (0.8 g, 10 mmol). Flash column chromatography on silica gel provided the title compound as a colorless oil (0.8 g, 60% yield).

**<sup>1</sup>H NMR** (400 MHz, CDCl<sub>3</sub>) δ 5.13 – 5.07 (m, 1H), 2.40 – 2.35 (m, 2H), 2.35 – 2.28 (m, 2H), 1.69 (s, 3H), 1.62 (s, 3H);

**<sup>13</sup>C NMR** (101 MHz, CDCl<sub>3</sub>) δ 180.3, 133.5, 122.2, 34.4, 25.8, 23.5, 17.7;

The data are consistent with that reported previously.

### 4,5-Dimethylhex-4-enoic acid (**1s**)<sup>12</sup>

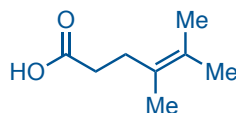

Prepared according to the general procedure A with 2,3-dimethylbut-3-en-2-ol (1.7 g, 14.8 mmol). Flash column chromatography on silica gel provided the title compound as a colorless oil (553 mg, 26% yield).

**<sup>1</sup>H NMR** (500 MHz, CDCl<sub>3</sub>) δ 2.41 – 2.34 (m, 4H), 1.67 (s, 3H), 1.64 (s, 6H);

**<sup>13</sup>C NMR** (101 MHz, CDCl<sub>3</sub>) δ 180.4, 126.1, 125.5, 33.0, 29.8, 20.8, 20.2;

The data are consistent with that reported previously.

#### 4. General procedure B for reaction optimization

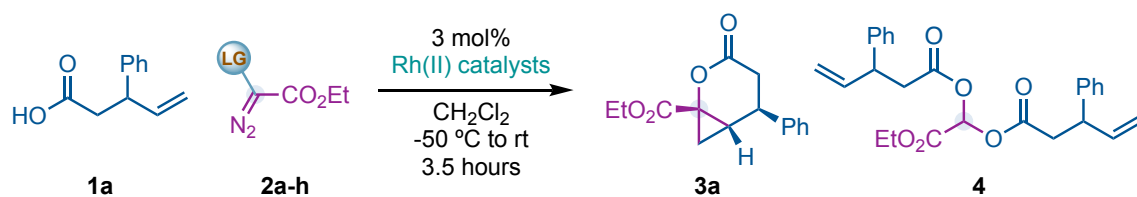

To a 10 mL oven-dried tube equipped with a stirring bar was added the corresponding Rh catalyst. The tube was sealed before being evacuated and backfilled with argon three times. 3-Phenylpent-4-enoic acid and degassed dichloromethane (0.5 mL) were added and the resulting mixture was placed into a cooling bath at -50 °C. After this, a solution of the corresponding hypervalent iodine reagent (**2a-h**) in degassed dichloromethane (1.0 mL) was added dropwise to the reaction tube for 30 minutes using a syringe pump. Then the resulting mixture was allowed to warm to room temperature in 3 hours, filtered through a short plug of celite and washed with dichloromethane (3 x 1.0 mL). Solvent was removed under *vacuum* and <sup>1</sup>H NMR yield was measured using dibromomethane (7 μL, 0.1 mmol, 1.0 equiv.) as internal standard.

**Table S1.** Full optimization studies

| Entry | Reagent <b>2</b> | Stoichiometry( <b>2</b> : <b>1</b> ) | Rh catalyst                                 | Additive | Yield <b>3a</b> ( <b>4</b> ) [%] |
|-------|------------------|--------------------------------------|---------------------------------------------|----------|----------------------------------|
| 1     | <b>2b</b>        | 1: 1                                 | Rh <sub>2</sub> (esp) <sub>2</sub> (1 mol%) | /        | 26 (5)                           |
| 2     | <b>2b</b>        | 2: 1                                 | Rh <sub>2</sub> (esp) <sub>2</sub> (1 mol%) | /        | 41 (8)                           |
| 3     | <b>2b</b>        | 1: 2                                 | Rh <sub>2</sub> (esp) <sub>2</sub> (1 mol%) | /        | 27 (18)                          |
| 4     | <b>2b</b>        | 1.5: 1                               | Rh <sub>2</sub> (esp) <sub>2</sub> (1 mol%) | /        | 42 (8)                           |
| 5     | <b>2b</b>        | 1.3: 1                               | Rh <sub>2</sub> (esp) <sub>2</sub> (1 mol%) | /        | 43 (7)                           |
| 6     | <b>2b</b>        | 1.3: 1                               | Rh <sub>2</sub> (esp) <sub>2</sub> (3 mol%) | /        | 45 (5)                           |
| 7     | <b>2b</b>        | 1.3: 1                               | Rh <sub>2</sub> (esp) <sub>2</sub> (5 mol%) | /        | 45 (<5)                          |
| 8     | <b>2b</b>        | 1.3: 1                               | Rh <sub>2</sub> (esp) <sub>2</sub> (3 mol%) | /        | 64 (<5) <sup>a</sup>             |
| 9     | <b>2b</b>        | 1.3: 1                               | Rh <sub>2</sub> (OAc) <sub>4</sub> (3 mol%) | /        | 30 (21) <sup>a</sup>             |
| 10    | <b>2b</b>        | 1.3: 1                               | Rh <sub>2</sub> (TPA) <sub>4</sub> (3 mol%) | /        | 0 (0) <sup>a</sup>               |
| 11    | <b>2b</b>        | 1.3: 1                               | Rh <sub>2</sub> (Oct) <sub>4</sub> (3 mol%) | /        | 31 (20) <sup>a</sup>             |
| 12    | <b>2b</b>        | 1.3: 1                               | Rh <sub>2</sub> (Adc) <sub>4</sub> (3 mol%) | /        | 40 (10) <sup>a</sup>             |
| 13    | <b>2b</b>        | 1: 2                                 | Rh <sub>2</sub> (OAc) <sub>4</sub> (3 mol%) | /        | 0 (65) <sup>a</sup>              |
| 14    | <b>2a</b>        | 1.3: 1                               | Rh <sub>2</sub> (esp) <sub>2</sub> (3 mol%) | /        | 52 (5) <sup>a</sup>              |
| 15    | <b>2c</b>        | 1.3: 1                               | Rh <sub>2</sub> (esp) <sub>2</sub> (3 mol%) | /        | 43 (7) <sup>a</sup>              |
| 16    | <b>2d</b>        | 1.3: 1                               | Rh <sub>2</sub> (esp) <sub>2</sub> (3 mol%) | /        | 32 (12) <sup>a</sup>             |

|    |           |        |                                             |                                           |                      |
|----|-----------|--------|---------------------------------------------|-------------------------------------------|----------------------|
| 17 | <b>2e</b> | 1.3: 1 | Rh <sub>2</sub> (esp) <sub>2</sub> (3 mol%) | /                                         | 0 (0) <sup>a</sup>   |
| 18 | <b>2b</b> | 1.3: 1 | Rh <sub>2</sub> (esp) <sub>2</sub> (3 mol%) | Na <sub>2</sub> CO <sub>3</sub> (2 equiv) | 60 (5) <sup>a</sup>  |
| 19 | <b>2b</b> | 1.3: 1 | Rh <sub>2</sub> (esp) <sub>2</sub> (3 mol%) | NaHCO <sub>3</sub> (2 equiv)              | 72 (<5) <sup>a</sup> |
| 20 | <b>2b</b> | 1.3: 1 | Rh <sub>2</sub> (esp) <sub>2</sub> (3 mol%) | KHCO <sub>3</sub> (2 equiv)               | 61 (<5) <sup>a</sup> |
| 21 | <b>2b</b> | 1.3: 1 | Rh <sub>2</sub> (esp) <sub>2</sub> (3 mol%) | NaOAc (2 equiv)                           | 25 (5) <sup>a</sup>  |
| 22 | <b>2b</b> | 1.3: 1 | Rh <sub>2</sub> (esp) <sub>2</sub> (3 mol%) | Et <sub>3</sub> N (2 equiv)               | 0 (0) <sup>a</sup>   |
| 23 | <b>2b</b> | 1.3: 1 | Rh <sub>2</sub> (esp) <sub>2</sub> (3 mol%) | DTBP (2 equiv)                            | 10 (5) <sup>a</sup>  |
| 24 | <b>2f</b> | 1.3: 1 | Rh <sub>2</sub> (esp) <sub>2</sub> (3 mol%) | NaHCO <sub>3</sub> (2 equiv)              | 0 (0) <sup>a</sup>   |
| 25 | <b>2g</b> | 1.3: 1 | Rh <sub>2</sub> (esp) <sub>2</sub> (3 mol%) | NaHCO <sub>3</sub> (2 equiv)              | 0 (0) <sup>a</sup>   |
| 26 | <b>2h</b> | 1.3: 1 | Rh <sub>2</sub> (esp) <sub>2</sub> (3 mol%) | NaHCO <sub>3</sub> (2 equiv)              | 0 (0)                |

<sup>a</sup> Reagents **2a-g** and the carboxylic acid were dissolved in dichloromethane (1.0 mL) and added in the same syringe dropwise to the Rh catalyst dissolved in dichloromethane (0.5 mL).

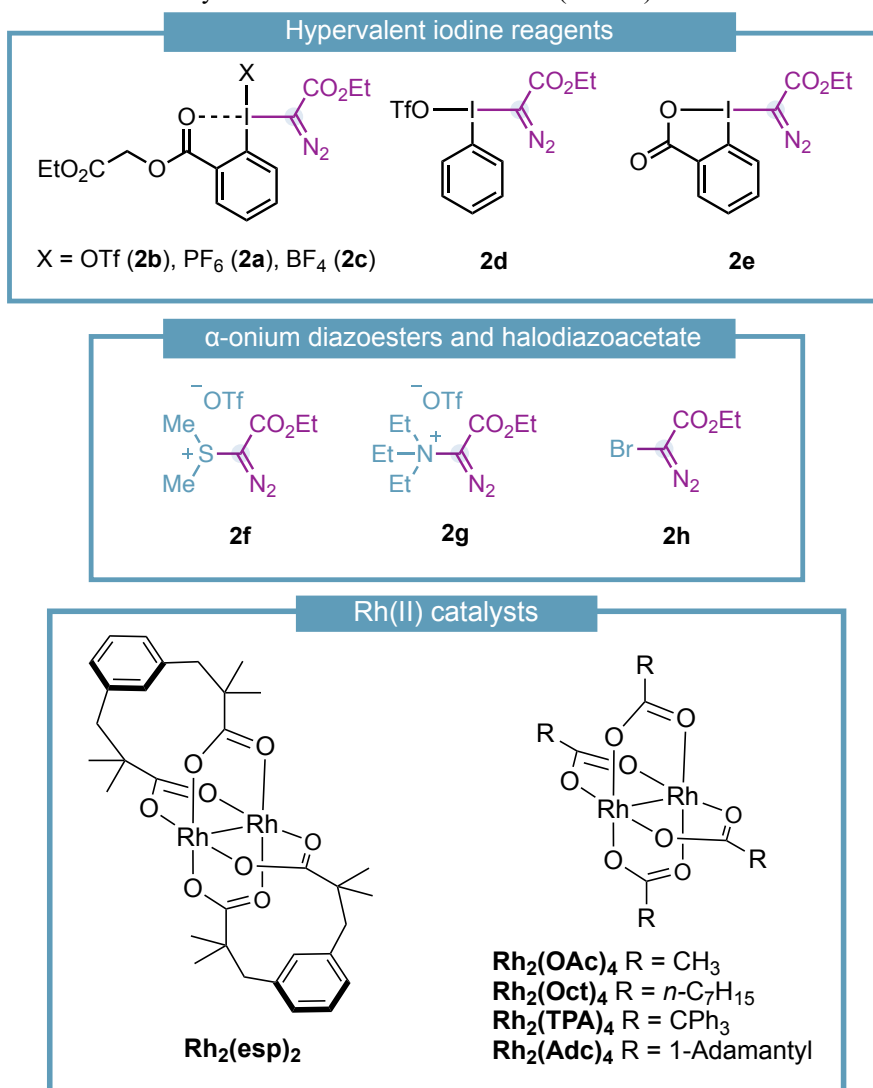

- **Synthesis of 2-ethoxy-2-oxoethane-1,1-diyl bis(3-phenylpent-4-enoate) (4)**



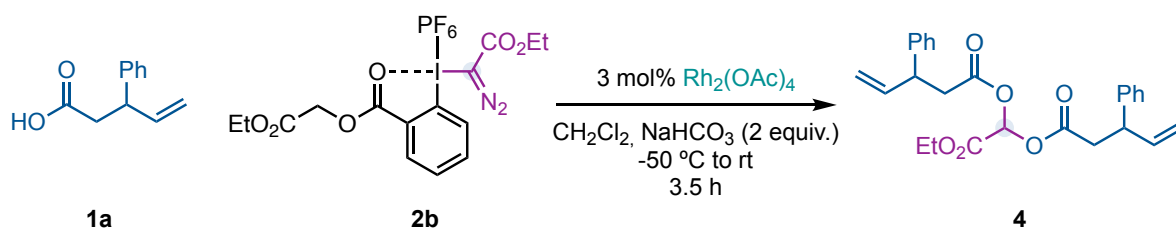

To a 10 mL oven-dried flask equipped with a stirring bar was added  $\text{Rh}_2(\text{OAc})_4$  (2.6 mg, 0.006 mmol, 3 mol%) and  $\text{NaHCO}_3$  (33.6 mg, 0.4 mmol, 2 equiv.). The flask was sealed before being evacuated and backfilled with argon three times. Degassed dichloromethane (0.5 mL) was added and the resulting mixture was cooled at  $-50\text{ }^\circ\text{C}$ . Then, a solution of hypervalent iodine reagent **2b** (118.4 mg, 0.2 mmol, 1.0 equiv.) and 3-phenylpent-4-enoic acid (**1a**) (70.4 mg, 0.4 mmol, 2.0 equiv.) in degassed dichloromethane (2.0 mL) was added dropwise to the reaction flask during 30 min using a syringe pump. The mixture was stirred at  $-50\text{ }^\circ\text{C}$  for 1 hour and then allowed to warm to room temperature in 3 hours, filtered through a short plug of celite and washed with dichloromethane (3 x 1.0 mL). Solvent was removed under *vacuum* and flash column chromatography on silica gel (hexane/ethyl acetate: 10/1) of the crude residue provided the title compound **4** as a mixture of 4 diastereoisomers (52.4 mg, 65% yield). Ratio of diastereoisomers was determined to be 1:1:1:1 using GC-MS.

**IR** ( $\text{cm}^{-1}$ ): 3083, 3029, 2981, 2964, 2925, 2854, 1762, 1730, 1376, 1226, 1077, 1051, 921, 701;

**$^1\text{H}$  NMR** (400 MHz,  $\text{CDCl}_3$ )  $\delta$  7.34 – 7.27 (m, 4H), 7.25 – 7.17 (m, 6H), 6.76 (t,  $J = 2.4$  Hz, 1H), 6.03 – 5.89 (m, 1H), 5.14 – 5.01 (m, 4H), 4.26 – 4.16 (m, 2H), 3.91 – 3.82 (m, 2H), 2.89 – 2.73 (m, 4H), 1.27 – 1.20 (m, 3H);

**$^{13}\text{C}$  NMR** (101 MHz,  $\text{CDCl}_3$ )  $\delta$  169.48, 169.46, 169.44, 169.42, 164.94, 164.91, 164.88, 141.98, 141.96, 128.80, 127.69, 127.67, 127.01, 115.35, 84.34, 62.67, 62.64, 62.62, 45.21, 45.20, 45.17, 39.66, 39.66, 39.62, 14.04;

**HRMS** (ESI): calculated for  $\text{C}_{26}\text{H}_{28}\text{O}_6\text{Na}^+$   $[\text{M}+\text{Na}]^+$   $m/z$ : 459.1778, found: 459.1780.

## 5. Control experiments

### ▪ Reaction with ethyl 3-phenylpent-4-enoate (**1a-ester**)

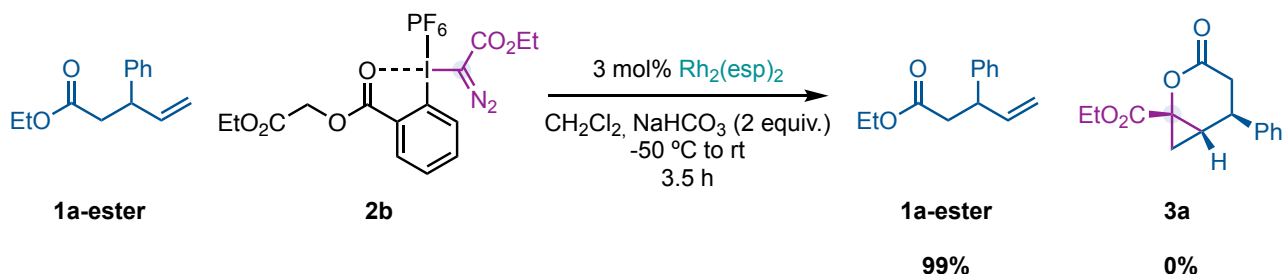

To a 10 mL oven-dried flask equipped with a stirring bar was added  $\text{Rh}_2(\text{esp})_2$  (4.6 mg, 0.006 mmol, 3 mol%) and  $\text{NaHCO}_3$  (33.6 mg, 0.4 mmol, 2 equiv.). The flask was sealed before being evacuated and backfilled with argon three times. Degassed dichloromethane (0.5 mL) was added, and the resulting mixture was cooled at  $-50\text{ }^\circ\text{C}$ . Then, a solution of hypervalent iodine reagent (**2b**) (153.9 mg, 0.26 mmol, 1.3 equiv.) and ethyl 3-phenylpent-4-enoate (**1a-ester**) (40.8 mg, 0.2 mmol, 1.0 equiv.) in degassed dichloromethane (2.0 mL) was added dropwise to the reaction flask during 30 min using a syringe pump. Then the resulting reaction mixture was allowed to warm to room temperature for 3 hours, filtered through a short plug of Celite and washed with  $\text{CH}_2\text{Cl}_2$  (3 x 1.0 mL). Solvent was removed under *vacuum* and  $^1\text{H-NMR}$  yield was measured using dibromomethane (7  $\mu\text{L}$ , 0.1 mmol, 1.0 equiv.) as internal standard. Analysis of the crude reaction by  $^1\text{H NMR}$  showed no conversion to product **3a** and 99% NMR yield of **1a-ester**.

### ▪ Reaction with tetrabutylammonium 3-phenylpent-4-en-1-carboxylate (**1a-TBA**)

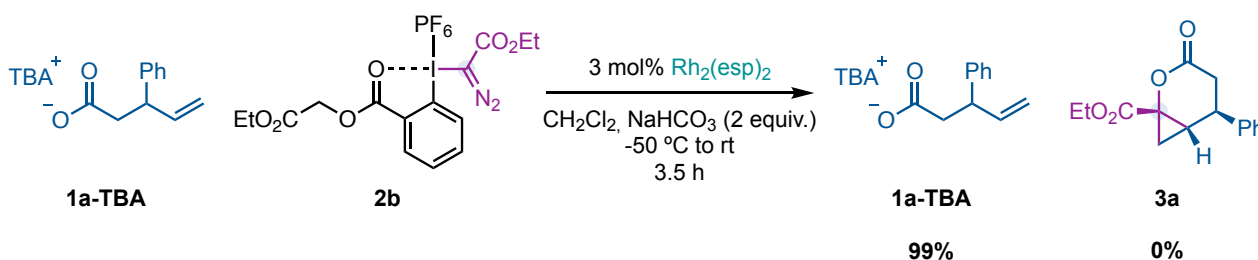

To a 10 mL oven-dried flask equipped with a stirring bar was added  $\text{Rh}_2(\text{esp})_2$  (4.6 mg, 0.006 mmol, 3 mol%) and  $\text{NaHCO}_3$  (33.6 mg, 0.4 mmol, 2 equiv.). The flask was sealed before being evacuated and backfilled with argon three times. Degassed dichloromethane (0.5 mL) was added, and the resulting mixture was cooled at  $-50\text{ }^\circ\text{C}$ . Then, a solution of hypervalent iodine reagent (**2b**) (153.9 mg, 0.26 mmol, 1.3 equiv.) and tetrabutylammonium 3-phenylpent-4-en-1-carboxylate (**1a-TBA**) (40.8 mg, 0.2 mmol, 1.0

equiv.) in degassed dichloromethane (2.0 mL) was added dropwise to the reaction flask during 30 min using a syringe pump. Then the resulting reaction mixture was allowed to warm to room temperature for 3 hours, filtered through a short plug of celite and washed with dichloromethane (3 x 1.0 mL). Solvent was removed under *vacuum* and  $^1\text{H}$  NMR yield was measured using dibromomethane (7  $\mu\text{L}$ , 0.1 mmol, 1.0 equiv.) as internal standard. Analysis of the crude reaction by  $^1\text{H}$  NMR showed no conversion to product **3a** and 99% NMR yield of **1a-TBA**.

▪ **Reaction without catalyst at room temperature**

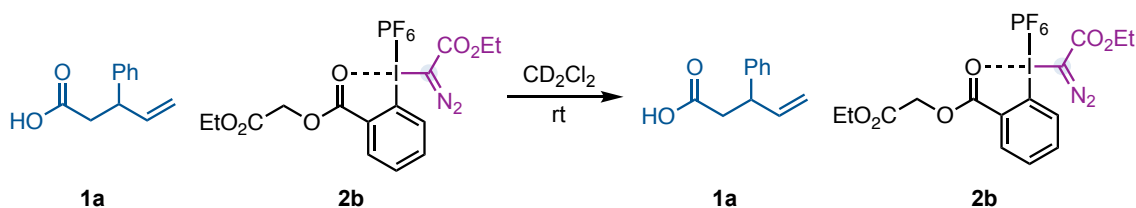

To an NMR tube were added **1a** (3.5 mg, 0.02 mmol, 1 equiv.), **2b** (11.8 mg, 0.02 mmol, 1 equiv.) and  $\text{CD}_2\text{Cl}_2$  (0.6 mL) at room temperature. A  $^1\text{H}$  NMR experiment was measured every 30 minutes for 2 hours and no reaction was observed between **1a** and **2b**.

**6. General procedure C for the synthesis of cyclopropyl-fused lactones 3**

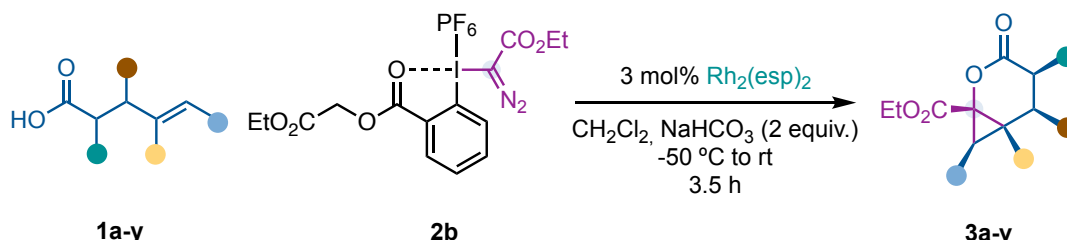

To a 10 mL oven-dried flask equipped with a stirring bar was added  $\text{Rh}_2(\text{esp})_2$  (4.6 mg, 0.006 mmol, 3 mol%) and  $\text{NaHCO}_3$  (33.6 mg, 0.4 mmol, 2 equiv.). The flask was sealed before being evacuated and backfilled with argon three times. Degassed dichloromethane (0.5 mL) was added and the resulting mixture was cooled at  $-50\text{ }^\circ\text{C}$ . Then, a solution of hypervalent iodine reagent **2b** (153.9 mg, 0.26 mmol, 1.3 equiv.) and the corresponding acid (**1a-y**) (0.2 mmol, 1.0 equiv.) in degassed dichloromethane (2.0 mL) were added dropwise to the reaction flask during 30 min using a syringe pump. Then the resulting reaction mixture was allowed to warm to room temperature in 3 hours, filtered through a short plug of celite and washed with dichloromethane (3 x 1.0 mL). Solvent was removed under *vacuum* and the crude residue was purified by flash chromatography on silica gel to yield the corresponding cyclopropyl-fused lactones **3**. If

residual carboxylic acid was observed by  $^1\text{H}$  NMR of the crude, the corresponding flash chromatography on silica gel was packed with hexane/ethyl acetate/ $\text{Et}_3\text{N}$  (10/1/0.1).

**Ethyl (1*S*\*,5*R*\*,6*S*\*)-3-oxo-5-phenyl-2-oxabicyclo[4.1.0]heptane-1-carboxylate (3a)**

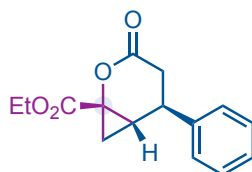

Prepared according to the general procedure C using 3-phenylpent-4-enoic acid (**1a**) (17.6 mg, 1.0 equiv., 0.2 mmol). Ratio of diastereoisomers was determined to be >20:1 from the crude reaction mixture using  $^1\text{H}$  NMR spectroscopy. Purification by flash chromatography on silica gel (hexane/ethyl acetate: 10/1 to 10/3) provided the title compound as a colorless oil (37.5 mg, 72% yield).

**IR** ( $\text{cm}^{-1}$ ): 3081, 3048, 2974, 2956, 1760, 1725, 1454, 1376, 1284, 1218, 1194, 1148, 970, 845, 740;

**$^1\text{H}$  NMR** (400 MHz,  $\text{CDCl}_3$ )  $\delta$  7.42 – 7.25 (m, 5H), 4.27 (q,  $J = 7.1$  Hz, 2H), 2.98 (ddd,  $J = 11.0, 6.5, 4.5$  Hz, 1H), 2.73 – 2.60 (m, 2H), 2.06 (ddd,  $J = 9.7, 7.1, 6.5$  Hz, 1H), 1.97 (dd,  $J = 9.7, 6.0$  Hz, 1H), 1.47 – 1.42 (m, 1H), 1.31 (t,  $J = 7.1$  Hz, 3H);

**$^{13}\text{C}$  NMR** (101 MHz,  $\text{CDCl}_3$ )  $\delta$  170.8, 170.3, 141.0, 129.3, 127.8, 126.9, 62.3, 61.7, 41.7, 35.8, 28.6, 24.3, 14.3;

**HRMS** (ESI): calculated for  $\text{C}_{15}\text{H}_{16}\text{O}_4\text{Na}^+$  [ $\text{M}+\text{Na}$ ] $^+$   $m/z$ : 283.0941, found: 283.0951;

$^1\text{H}$ - $^1\text{H}$  COSY,  $^1\text{H}$ - $^{13}\text{C}$  HSQC,  $^1\text{H}$ - $^{13}\text{C}$  HMBC,  $^1\text{H}$ - $^1\text{H}$  NOESY spectra were measured.

**Ethyl (1*S*\*,5*R*\*,6*S*\*)-3-oxo-5-(*p*-tolyl)-2-oxabicyclo[4.1.0]heptane-1-carboxylate (3b)**

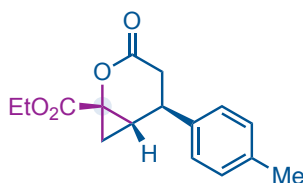

Prepared according to the general procedure C using 3-(*p*-tolyl)pent-4-enoic acid (**1b**) (19.0 mg, 1.0 equiv., 0.2 mmol). Ratio of diastereoisomers was determined to be >20:1 from the crude reaction mixture using  $^1\text{H}$  NMR spectroscopy. Purification by flash chromatography on silica gel (hexane/ethyl acetate: 10/1 to 10/3) provided the title compound as a colorless oil (39.0 mg, 71% yield).

**IR** (cm<sup>-1</sup>): 3082, 3039, 2980, 2965, 1765, 1724, 1452, 1380, 1289, 1246, 1172, 1131, 999, 823, 743;  
**<sup>1</sup>H NMR** (400 MHz, CDCl<sub>3</sub>) δ 7.22 – 7.12 (m, 4H), 4.26 (q, *J* = 7.0 Hz, 2H), 2.94 (ddd, *J* = 11.0, 6.5, 4.6 Hz, 1H), 2.70 – 2.57 (m, 2H), 2.35 (s, 3H), 2.04 (ddd, *J* = 9.6, 7.1, 6.5 Hz, 1H), 1.96 (dd, *J* = 9.6, 5.9 Hz, 1H), 1.46 – 1.41 (m, 1H), 1.31 (t, *J* = 7.1 Hz, 3H).

**<sup>13</sup>C NMR** (101 MHz, CDCl<sub>3</sub>) δ 170.9, 170.3, 138.1, 137.5, 129.9, 126.7, 62.3, 61.7, 41.4, 36.0, 28.7, 24.3, 21.1, 14.3.

**HRMS** (ESI): calculated for C<sub>16</sub>H<sub>18</sub>O<sub>4</sub>Na<sup>+</sup> [*M*+Na]<sup>+</sup> *m/z*: 297.1097, found: 297.1095.

**Ethyl (1*S*\*,5*R*\*,6*S*\*)-5-(4-methoxyphenyl)-3-oxo-2-oxabicyclo[4.1.0]heptane-1-carboxylate (3c)**

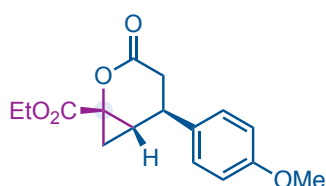

Prepared according to the general procedure C using 3-(4-methoxyphenyl)pent-4-enoic acid (**1c**) (41.2 mg, 1.0 equiv., 0.2 mmol). After dropwise addition of reagent **2b**, the resulting reaction mixture was stirred for an additional period of 30 minutes at –50 °C. Ratio of diastereoisomers was determined to be >20:1 from the crude reaction mixture using <sup>1</sup>H NMR spectroscopy. Purification by flash chromatography on silica gel (hexane/ethyl acetate: 10/1 to 10/3) provided the title compound as a colorless oil (29.0 mg, 50% yield).

**IR** (cm<sup>-1</sup>): 3049, 3003, 2923, 2900, 1763, 1730, 1493, 1339, 1239, 1269, 1103, 923, 834, 754;

**<sup>1</sup>H NMR** (400 MHz, CDCl<sub>3</sub>) δ 7.21 – 7.15 (m, 2H), 6.94 – 6.88 (m, 2H), 4.26 (q, *J* = 7.1 Hz, 2H), 3.81 (s, 3H), 2.93 (ddd, *J* = 10.8, 6.3, 4.3 Hz, 1H), 2.69 – 2.55 (m, 2H), 2.06 – 1.92 (m, 2H), 1.45 – 1.40 (m, 1H), 1.31 (t, *J* = 7.1 Hz, 3H);

**<sup>13</sup>C NMR** (101 MHz, CDCl<sub>3</sub>) δ 170.9, 170.3, 159.2, 133.1, 127.9, 114.6, 62.3, 61.7, 55.5, 41.0, 36.1, 28.8, 24.3, 14.3;

**HRMS** (ESI): calculated for C<sub>16</sub>H<sub>18</sub>O<sub>5</sub>Na<sup>+</sup> [*M*+Na]<sup>+</sup> *m/z*: 313.1046, found: 313.1035.

**Ethyl (1*S*\*,5*R*\*,6*S*\*)-5-(4-fluorophenyl)-3-oxo-2-oxabicyclo[4.1.0]heptane-1-carboxylate (3d)**

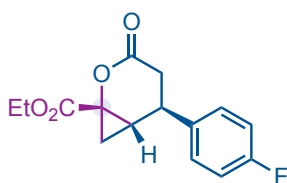

Prepared according to the general procedure C using 3-(4-fluorophenyl)pent-4-enoic acid (**1d**) (38.8 mg, 1.0 equiv., 0.2 mmol). Ratio of diastereoisomers was determined to be >20:1 from the crude reaction mixture using <sup>1</sup>H NMR spectroscopy. Purification by flash chromatography on silica gel (hexane/ethyl acetate: 10/1 to 10/3) provided the title compound as a colorless oil (36.7 mg, 66% yield).

**IR** (cm<sup>-1</sup>): 3065, 3011, 2967, 2910, 1760, 1725, 1454, 1396, 1265, 1234, 1196, 900, 845, 705;

**<sup>1</sup>H NMR** (400 MHz, CDCl<sub>3</sub>) δ 7.27 – 7.21 (m, 2H), 7.11 – 7.04 (m, 2H), 4.27 (qd, *J* = 7.2, 0.4 Hz, 2H), 2.98 (ddd, *J* = 11.0, 6.3, 4.3 Hz, 1H), 2.70 – 2.56 (m, 2H), 2.04 – 1.94 (m, 2H), 1.46 – 1.43 (m, 1H), 1.31 (t, *J* = 7.1 Hz, 3H);

**<sup>13</sup>C NMR** (101 MHz, CDCl<sub>3</sub>) δ 170.5, 170.2, 162.3 (d, *J* = 246.9 Hz), 136.8 (d, *J* = 2.9 Hz), 128.4 (d, *J* = 8.1 Hz), 116.2 (d, *J* = 21.6 Hz), 62.4, 61.7, 41.0, 35.9, 28.6, 24.2, 14.3;

**<sup>19</sup>F NMR** (376 MHz, CDCl<sub>3</sub>) δ -114.3 (tt, *J* = 8.8, 5.3 Hz);

**HRMS** (ESI): calculated for C<sub>15</sub>H<sub>15</sub>O<sub>4</sub>FNa<sup>+</sup> [M+Na]<sup>+</sup> *m/z*: 301.0847, found: 301.0850.

#### **Ethyl (1*S*\*,5*R*\*,6*S*\*)-5-(4-chlorophenyl)-3-oxo-2-oxabicyclo[4.1.0]heptane-1-carboxylate (**3e**)**

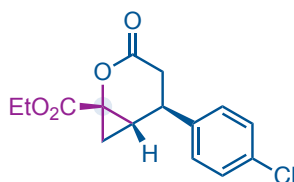

Prepared according to the general procedure C using 3-(4-chlorophenyl)pent-4-enoic acid (**1e**) (42.1 mg, 1.0 equiv., 0.2 mmol). Ratio of diastereoisomers was determined to be >20:1 from the crude reaction mixture using <sup>1</sup>H NMR spectroscopy. Purification by flash chromatography on silica gel (hexane/ethyl acetate: 10/1 to 10/3) provided the title compound as a colorless oil (33.0 mg, 56% yield).

**IR** (cm<sup>-1</sup>): 3100, 3020, 2958, 2913, 1760, 1729, 1498, 1343, 1243, 1265, 990, 893, 714;

**<sup>1</sup>H NMR** (500 MHz, CDCl<sub>3</sub>) δ 7.37 – 7.33 (m, 2H), 7.23 – 7.18 (m, 2H), 4.26 (qd, *J* = 7.2, 0.8 Hz, 2H), 3.00 – 2.94 (m, 1H), 2.69 – 2.57 (m, 2H), 2.03 – 1.94 (m, 2H), 1.48 – 1.41 (m, 1H), 1.31 (t, *J* = 7.1 Hz, 3H);

**<sup>13</sup>C NMR** (101 MHz, CDCl<sub>3</sub>) δ 170.3, 170.1, 139.5, 133.7, 129.5, 128.2, 62.4, 61.7, 41.1, 35.7, 28.3, 24.2, 14.3;

**HRMS** (ESI): calculated for C<sub>15</sub>H<sub>15</sub>O<sub>4</sub>ClNa<sup>+</sup> [M+Na]<sup>+</sup> *m/z*: 317.0551, found: 317.0549.

**Ethyl (1*S*\*,5*R*\*,6*S*\*)-3-oxo-5-(4-(trifluoromethyl)phenyl)-2-oxabicyclo[4.1.0]heptane-1-carboxylate (3f)**

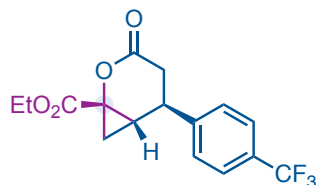

Prepared according to the general procedure C using 3-(4-(trifluoromethyl)phenyl)pent-4-enoic acid (**1f**) (48.8 mg, 1.0 equiv., 0.2 mmol). After dropwise addition of reagent **2b**, the resulting reaction mixture was stirred for an additional period of 1 hour at  $-50\text{ }^{\circ}\text{C}$ . Ratio of diastereoisomers was determined to be  $>20:1$  from the crude reaction mixture using  $^1\text{H}$  NMR spectroscopy. Purification by flash chromatography on silica gel (hexane/ethyl acetate: 10/1 to 10/3) provided the title compound as a colorless oil (29.6 mg, 45% yield).

**IR** ( $\text{cm}^{-1}$ ): 3087, 3008, 2945, 2900, 1770, 1724, 1458, 1328, 1257, 1222, 1187, 934, 870, 711;

**$^1\text{H}$  NMR** (400 MHz,  $\text{CDCl}_3$ )  $\delta$  7.69 – 7.61 (m, 2H), 7.43 – 7.37 (m, 2H), 4.27 (qd,  $J = 7.1, 0.5$  Hz, 2H), 3.11 – 3.04 (m, 1H), 2.74 – 2.61 (m, 2H), 2.06 – 1.96 (m, 2H), 1.50 – 1.46 (m, 1H), 1.31 (t,  $J = 7.2$  Hz, 3H);

**$^{13}\text{C}$  NMR** (101 MHz,  $\text{CDCl}_3$ )  $\delta$  170.1, 170.0, 144.9 (q,  $J = 1.5$  Hz), 130.3 (q,  $J = 32.6$  Hz), 127.4, 126.3 (q,  $J = 3.8$  Hz), 124.0 (q,  $J = 273.0$  Hz), 62.5, 61.7, 41.4, 35.4, 28.1, 24.1, 14.3;

**$^{19}\text{F}$  NMR** (376 MHz,  $\text{CDCl}_3$ )  $\delta$  -62.8;

**HRMS** (ESI): calculated for  $\text{C}_{16}\text{H}_{15}\text{O}_4\text{F}_3\text{Na}^+$   $[\text{M}+\text{Na}]^+$   $m/z$ : 351.0815, found: 351.0804.

**Ethyl (1*S*\*,5*R*\*,6*S*\*)-3-oxo-5-(*m*-tolyl)-2-oxabicyclo[4.1.0]heptane-1-carboxylate (3g)**

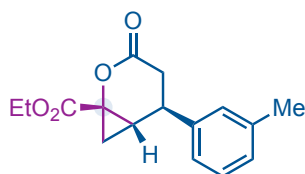

Prepared according to the general procedure C using 3-(*m*-tolyl)pent-4-enoic acid (**1g**) (19.0 mg, 1.0 equiv., 0.2 mmol). Ratio of diastereoisomers was determined to be  $>20:1$  from the crude reaction mixture using  $^1\text{H}$  NMR spectroscopy. Purification by flash chromatography on silica gel (hexane/ethyl acetate: 10/1 to 10/3) provided the title compound as a colorless oil (35.7 mg, 65% yield).

**IR** (cm<sup>-1</sup>): 3067, 3023, 2956, 2876, 1754, 1702, 1465, 1343, 1245, 1190, 930, 875, 780;

**<sup>1</sup>H NMR** (400 MHz, CDCl<sub>3</sub>) δ 7.31 – 7.23 (m, 1H), 7.16 – 7.02 (m, 2H), 4.27 (q, *J* = 7.1 Hz, 2H), 2.94 (ddd, *J* = 11.1, 6.5, 5.1 Hz, 1H), 2.71 – 2.58 (m, 2H), 2.37 (s, 3H), 2.05 (ddd, *J* = 9.7, 7.1, 6.5 Hz, 1H), 1.96 (dd, *J* = 9.7, 5.9 Hz, 1H), 1.44 (ddd, *J* = 7.1, 5.9, 0.6 Hz, 1H), 1.31 (t, *J* = 7.2 Hz, 3H);

**<sup>13</sup>C NMR** (101 MHz, CDCl<sub>3</sub>) δ 170.9, 170.3, 141.0, 139.0, 129.2, 128.5, 127.6, 123.8, 62.3, 61.7, 41.7, 35.9, 28.7, 24.3, 21.6, 14.3;

**HRMS** (ESI): calculated for C<sub>16</sub>H<sub>18</sub>O<sub>4</sub>Na<sup>+</sup> [*M*+Na]<sup>+</sup> *m/z*: 297.1097, found: 297.1095.

### Ethyl (1*S*\*,5*R*\*,6*S*\*)-3-oxo-5-(*o*-tolyl)-2-oxabicyclo[4.1.0]heptane-1-carboxylate (**3h**)

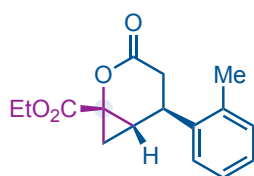

Prepared according to the general procedure C using 3-(*o*-tolyl)pent-4-enoic acid (**1h**) (19.0 mg, 1.0 equiv., 0.2 mmol). Ratio of diastereoisomers was determined to be >20:1 from the crude reaction mixture using <sup>1</sup>H NMR spectroscopy. Purification by flash chromatography on silica gel (hexane/ethyl acetate: 10/1 to 10/3) provided the title compound as a colorless oil (32.4 mg, 59% yield).

**IR** (cm<sup>-1</sup>): 3087, 3065, 2943, 2907, 1763, 1720, 1460, 1330, 1250, 1243, 1200, 946, 870, 800;

**<sup>1</sup>H NMR** (400 MHz, CDCl<sub>3</sub>) δ 7.29 – 7.15 (m, 4H), 4.25 (q, *J* = 7.2 Hz, 2H), 3.12 (ddd, *J* = 12.3, 6.8, 3.6 Hz, 1H), 2.75 (dd, *J* = 15.6, 12.3 Hz, 1H), 2.64 (dd, *J* = 15.6, 3.6 Hz, 1H), 2.39 (s, 3H), 2.00 (dd, *J* = 9.6, 6.0 Hz, 1H), 1.88 (dt, *J* = 9.6, 7.2 Hz, 1H), 1.47 (ddd, *J* = 7.2, 6.0, 0.6 Hz, 1H), 1.30 (t, *J* = 7.2 Hz, 3H);

**<sup>13</sup>C NMR** (101 MHz, CDCl<sub>3</sub>) δ 171.4, 170.2, 139.2, 136.0, 131.0, 127.5, 126.9, 124.9, 62.3, 61.7, 37.9, 34.7, 28.6, 25.0, 20.0, 14.3;

**HRMS** (ESI): calculated for C<sub>16</sub>H<sub>18</sub>O<sub>4</sub>Na<sup>+</sup> [*M*+Na]<sup>+</sup> *m/z*: 297.1097, found: 297.1097.

### Ethyl (1*S*\*,5*R*\*,6*S*\*)-5-methyl-3-oxo-2-oxabicyclo[4.1.0]heptane-1-carboxylate (**3i**)

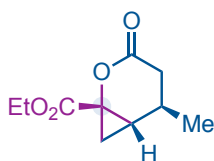

Prepared according to the general procedure C using 3-methylpent-4-enoic acid (22.8 mg, 1.0 equiv., 0.2 mmol). After dropwise addition of reagent **2b**, the resulting reaction mixture was stirred for an additional



period of 30 minutes at  $-50\text{ }^{\circ}\text{C}$ . Ratio of diastereoisomers was determined to be  $>20:1$  from the crude reaction mixture using  $^1\text{H}$  NMR spectroscopy. Purification by flash chromatography on silica gel (hexane/ethyl acetate: 10/1 to 10/3) provided the title compound as a colorless oil (29.7 mg, 75% yield).

**IR** ( $\text{cm}^{-1}$ ): 2970, 2900, 2864, 1754, 1723, 1454, 1319, 1289, 1245, 1215, 1201, 1167, 1100, 980;

**$^1\text{H}$  NMR** (400 MHz,  $\text{CDCl}_3$ )  $\delta$  4.24 (qd,  $J = 7.1, 1.8$  Hz, 2H), 2.41 (dd,  $J = 15.9, 3.6$  Hz, 1H), 2.14 (dd,  $J = 15.9, 11.8$  Hz, 1H), 1.91 – 1.81 (m, 2H), 1.62 (ddd,  $J = 9.7, 7.3, 6.1$  Hz, 1H), 1.30 (t,  $J = 7.1$  Hz, 3H), 1.27 (d,  $J = 6.8$  Hz, 3H), 1.25 – 1.22 (m, 1H);

**$^1\text{H}$  NMR** (500 MHz,  $\text{CD}_3\text{OD}$ )  $\delta$  4.15 (q,  $J = 7.1$  Hz, 2H), 2.48 (dd,  $J = 15.6, 5.8$  Hz, 1H), 2.27 (dd,  $J = 15.6, 8.1$  Hz, 1H), 1.89 – 1.82 (m, 1H), 1.41 – 1.30 (m, 2H), 1.25 (t,  $J = 7.1$  Hz, 3H), 1.14 (d,  $J = 6.9$  Hz, 3H), 0.77 (dd,  $J = 7.2, 4.6$  Hz, 1H);

**$^{13}\text{C}$  NMR** (101 MHz,  $\text{CDCl}_3$ )  $\delta$  171.2, 170.6, 62.2, 61.7, 36.9, 31.4, 28.6, 24.1, 21.1, 14.3;

**$^{13}\text{C}$  NMR** (126 MHz,  $\text{CD}_3\text{OD}$ )  $\delta$  176.94, 176.42, 62.16, 57.98, 42.03, 34.94, 30.35, 22.03, 19.97, 14.50;

**HRMS** (ESI): calculated for  $\text{C}_{10}\text{H}_{14}\text{O}_4\text{Na}^+$   $[\text{M}+\text{Na}]^+$   $m/z$ : 221.0784, found: 221.0785;

$^1\text{H}$ - $^1\text{H}$  COSY,  $^1\text{H}$ - $^{13}\text{C}$  HSQC,  $^1\text{H}$ - $^1\text{H}$  NOESY spectra were measured in  $\text{CD}_3\text{OD}$ .

### **Ethyl (1*S*\*,6*S*\*)-5,5-dimethyl-3-oxo-2-oxabicyclo[4.1.0]heptane-1-carboxylate (3j)**

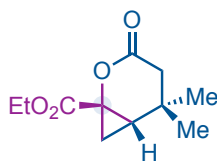

Prepared according to the general procedure C using 3,3-dimethylpent-4-enoic acid (**1j**) (25.6 mg, 1.0 equiv., 0.2 mmol). Ratio of diastereoisomers was determined to be  $>20:1$  from the crude reaction mixture using  $^1\text{H}$  NMR spectroscopy. Purification by flash chromatography on silica gel (hexane/ethyl acetate: 10/1 to 10/3) provided the title compound as a colorless oil (36.1 mg, 85% yield).

**IR** ( $\text{cm}^{-1}$ ): 2967, 2906, 2888, 1767, 1722, 1465, 1334, 1289, 1245, 1294, 1290, 1150, 992, 876, 812;

**$^1\text{H}$  NMR** (400 MHz,  $\text{CDCl}_3$ )  $\delta$  4.25 (qd,  $J = 7.2, 1.4$  Hz, 2H), 2.28 (dd,  $J = 16.3, 1.0$  Hz, 1H), 2.15 (d,  $J = 16.3$  Hz, 1H), 1.76 (ddd,  $J = 10.2, 7.7, 1.0$  Hz, 1H), 1.66 (dd,  $J = 10.2, 6.5$  Hz, 1H), 1.30 (t,  $J = 7.2$  Hz, 3H), 1.29 (dd,  $J = 7.7, 6.5$  Hz, 1H), 1.22 (s, 3H), 1.07 (s, 3H);

**$^{13}\text{C}$  NMR** (101 MHz,  $\text{CDCl}_3$ )  $\delta$  170.1, 168.6, 62.2, 62.0, 41.5, 31.5, 30.4, 30.1, 27.4, 18.6, 14.3;

**HRMS** (ESI): calculated for  $\text{C}_{11}\text{H}_{16}\text{O}_4\text{Na}^+$   $[\text{M}+\text{Na}]^+$   $m/z$ : 235.0941, found: 235.0942.

**Ethyl (1*S*\*,6*S*\*)-4-oxo-5-oxaspiro[bicyclo[4.1.0]heptane-2,1'-cyclohexane]-6-carboxylate (3k)**

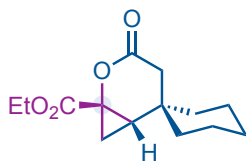

Prepared according to the general procedure C using 2-(1-vinylcyclohexyl)acetic acid (**1k**) (33.6 mg, 1.0 equiv., 0.2 mmol). Ratio of diastereoisomers was determined to be >20:1 from the crude reaction mixture using <sup>1</sup>H NMR spectroscopy. Purification by flash chromatography on silica gel (hexane/ethyl acetate: 10/1 to 10/3) provided the title compound as a colorless oil (40.9 mg, 81% yield).

**IR** (cm<sup>-1</sup>): 2983, 2929, 2856, 1755, 1726, 1450, 1314, 1282, 1244, 1207, 1175, 1153, 1103, 1018;

**<sup>1</sup>H NMR** (400 MHz, CDCl<sub>3</sub>) δ 4.24 (qd, *J* = 7.1, 1.3 Hz, 2H), 2.30 (d, *J* = 15.8 Hz, 1H), 2.16 (d, *J* = 15.8 Hz, 1H), 1.82 – 1.70 (m, 2H), 1.68 – 1.11 (m, 11H), 1.30 (t, *J* = 7.2 Hz, 3H);

**<sup>13</sup>C NMR** (101 MHz, CDCl<sub>3</sub>) δ 170.4, 170.0, 62.2, 62.0, 39.5, 34.5, 34.1, 25.5, 21.9, 21.7, 20.0, 14.3;

**HRMS** (ESI): calculated for C<sub>14</sub>H<sub>20</sub>O<sub>4</sub>Na<sup>+</sup> [M+Na]<sup>+</sup> *m/z*: 275.1254, found: 275.1245.

**Ethyl (1*S*\*,4*S*\*,6*R*\*)-4-methyl-3-oxo-2-oxabicyclo[4.1.0]heptane-1-carboxylate (3l)**

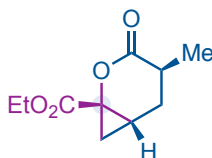

Prepared according to the general procedure C using 2-methylpent-4-enoic acid (22.8 mg, 1.0 equiv., 0.2 mmol). The reaction was stirred for an additional period of 1 hour at -50°C. Ratio of diastereoisomers was determined to be >20:1 from the crude reaction mixture using <sup>1</sup>H NMR spectroscopy. Purification by flash chromatography on silica gel (hexane/ethyl acetate: 10/1 to 10/3) provided the title compound as a colorless oil (27.0 mg, 68% yield).

**IR** (cm<sup>-1</sup>): 2982, 2937, 2877, 1759, 1732, 1459, 1398, 1382, 1347, 1305, 1279, 1257, 1152, 1095, 1069, 1039, 1017;

**<sup>1</sup>H NMR** (400 MHz, CDCl<sub>3</sub>) δ 4.22 (qd, *J* = 7.1, 2.6 Hz, 2H), 2.55 – 2.48 (m, 1H), 2.48 – 2.40 (m, 1H), 2.05 – 1.95 (m, 1H), 1.84 (dd, *J* = 9.6, 5.8 Hz, 1H), 1.43 – 1.30 (m, 1H), 1.28 (t, *J* = 7.2 Hz, 3H), 1.28 – 1.14 (m, 1H), 1.19 (d, *J* = 6.7 Hz, 3H);

**<sup>13</sup>C NMR** (101 MHz, CDCl<sub>3</sub>) δ 174.6, 170.8, 62.1, 60.9, 34.3, 32.0, 25.2, 22.7, 15.5, 14.3;

**HRMS** (ESI): calculated for  $C_{10}H_{14}O_4Na^+$   $[M+Na]^+$   $m/z$ : 221.0784, found: 221.0784;

$^1H$ - $^1H$  COSY,  $^1H$ - $^{13}C$  HSQC,  $^1H$ - $^1H$  NOESY spectra were measured.

**Ethyl (1*S*\*,4*R*\*,6*R*\*)-4-(1,3-dioxoisindolin-2-yl)-3-oxo-2-oxabicyclo[4.1.0]heptane-1-carboxylate (3*m*)**

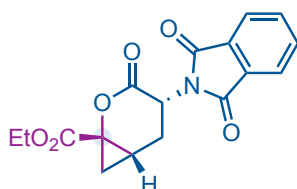

Prepared according to the general procedure C using 2-(1,3-dioxoisindolin-2-yl)pent-4-enoic acid (**1m**) (49.0 mg, 1.0 equiv., 0.2 mmol). The reaction was stirred for an additional period of 1 hour at  $-50^\circ C$ . Ratio of diastereoisomers was determined to be  $>20:1$  from the crude reaction mixture using  $^1H$  NMR spectroscopy. Purification by flash chromatography on silica gel (dichloromethane/diethyl ether: 25/1) provided the title compound as a white solid (19.8 mg, 30% yield).

**mp**: 185-187°C

**IR** ( $cm^{-1}$ ): 3100, 3023, 2956, 1767, 1754, 1702, 1465, 1350, 1290, 1190, 998, 870, 765;

**$^1H$  NMR** (400 MHz,  $CDCl_3$ )  $\delta$  7.92 – 7.82 (m, 2H), 7.80 – 7.71 (m, 2H), 5.02 – 4.90 (m, 1H), 4.37 – 4.20 (m, 2H), 2.70 – 2.56 (m, 2H), 2.19 – 2.06 (m, 1H), 1.96 (dd,  $J = 9.6, 6.1$  Hz, 1H), 1.49 (dd,  $J = 7.3, 6.1$  Hz, 1H), 1.33 (t,  $J = 7.2$  Hz, 3H);

**$^1H$  NMR** (500 MHz, MeOD)  $\delta$  7.93 – 7.83 (m, 5H), 5.11 (dd,  $J = 12.9, 5.4$  Hz, 1H), 4.27 (qq,  $J = 7.2, 3.6$  Hz, 2H), 2.70 (ddd,  $J = 13.3, 9.1, 5.4$  Hz, 1H), 2.54 (td,  $J = 13.3, 7.4$  Hz, 1H), 2.21 (tt,  $J = 9.1, 7.4$  Hz, 1H), 1.92 (dd,  $J = 9.7, 6.2$  Hz, 1H), 1.48 (dd,  $J = 8.0, 6.2$  Hz, 1H), 1.31 (t,  $J = 7.2$  Hz, 4H);

**$^{13}C$  NMR** (101 MHz,  $CDCl_3$ )  $\delta$  170.0, 167.3, 167.2, 134.6, 131.9, 123.9, 62.6, 61.0, 47.1, 28.2, 25.4, 21.6, 14.3;

**HRMS** (ESI): calculated for  $C_{17}H_{15}NO_6Na^+$   $[M+Na]^+$   $m/z$ : 352.0792, found: 352.0787;

$^1H$ - $^1H$  COSY,  $^1H$ - $^1H$  NOESY spectra were measured in  $CD_3OD$ .

### Ethyl (1*S*\*,6*R*\*)-3-oxo-2-oxabicyclo[4.1.0]heptane-1-carboxylate (**3n**)

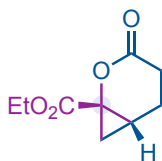

Prepared according to the general procedure C using pent-4-enoic acid (20.0 mg, 1.0 equiv., 0.2 mmol). Ratio of diastereoisomers was determined to be >20:1 from the crude reaction mixture using <sup>1</sup>H NMR spectroscopy. Purification by flash chromatography on silica gel (hexane/ethyl acetate: 10/1 to 10/3) provided the title compound as a colorless oil (22.8 mg, 62% yield).

**IR** (cm<sup>-1</sup>): 2984, 2937, 1760, 1726, 1307, 1244, 1207, 1152;

**<sup>1</sup>H NMR** (400 MHz, CDCl<sub>3</sub>) δ 4.23 (qd, *J* = 7.1, 1.8 Hz, 2H), 2.50 (dddd, *J* = 14.0, 8.0, 5.6, 4.5 Hz, 1H), 2.45 – 2.32 (m, 2H), 1.94 (dddd, *J* = 9.8, 8.0, 7.3, 6.3 Hz, 1H), 1.83 (dd, *J* = 9.8, 6.0 Hz, 1H), 1.71 – 1.61 (m, 1H), 1.29 (t, *J* = 7.1 Hz, 3H), 1.27 – 1.23 (m, 1H);

**<sup>13</sup>C NMR** (101 MHz, CDCl<sub>3</sub>) δ 170.6, 170.6, 62.2, 61.9, 28.5, 23.8, 22.6, 21.4, 14.3;

**HRMS** (ESI): calculated for C<sub>9</sub>H<sub>13</sub>O<sub>4</sub><sup>+</sup> [M+H]<sup>+</sup> *m/z*: 185.0808, found: 185.0802.

### Ethyl (1*S*\*,6*R*\*,7*R*\*)-7-methyl-3-oxo-2-oxabicyclo[4.1.0]heptane-1-carboxylate (**3o**)

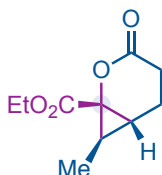

Prepared according to the general procedure C using (*E*)-hex-4-enoic acid (**1o**) (22.8 mg, 1.0 equiv., 0.2 mmol). Ratio of diastereoisomers was determined to be >20:1 from the crude reaction mixture using <sup>1</sup>H NMR spectroscopy. Purification by flash chromatography on silica gel (hexane/ethyl acetate: 10/1 to 10/3) provided the title compound as a colorless oil (17.8 mg, 45% yield).

**IR** (cm<sup>-1</sup>): 2981, 2937, 2878, 1763, 1727, 1455, 1372, 1283, 1246, 1151, 1115, 1037;

**<sup>1</sup>H NMR** (400 MHz, CDCl<sub>3</sub>) δ 4.25 (qq, *J* = 7.1, 3.7 Hz, 2H), 2.49 (dddd, *J* = 14.0, 8.3, 5.6, 4.1 Hz, 1H), 2.44 – 2.27 (m, 2H), 1.90 – 1.83 (m, 1H), 1.73 – 1.59 (m, 1H), 1.57 (dq, *J* = 8.0, 6.2 Hz, 1H), 1.30 (t, *J* = 7.1 Hz, 3H), 1.27 (d, *J* = 6.4 Hz, 3H);

**<sup>13</sup>C NMR** (101 MHz, CDCl<sub>3</sub>) δ 170.8, 169.2, 65.7, 61.9, 33.4, 28.9, 27.6, 22.8, 14.4, 11.9;

**HRMS** (ESI): calculated for C<sub>10</sub>H<sub>14</sub>O<sub>4</sub>Na<sup>+</sup> [M+Na]<sup>+</sup> *m/z*: 221.0784, found: 221.0782;

$^1\text{H}$ - $^1\text{H}$  COSY,  $^1\text{H}$ - $^{13}\text{C}$  HSQC,  $^1\text{H}$ - $^1\text{H}$  NOESY spectra were measured.

### Ethyl (1*S*\*,6*R*\*,7*R*\*)-7-methyl-3-oxo-2-oxabicyclo[4.1.0]heptane-1-carboxylate (3p)

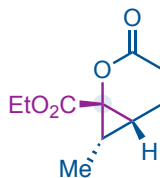

Prepared according to the general procedure C using (*Z*)-hex-4-enoic acid (**1p**) (22.8 mg, 1.0 equiv., 0.2 mmol). Ratio of diastereoisomers was determined to be >20:1 from the crude reaction mixture using  $^1\text{H}$  NMR spectroscopy. Purification by flash chromatography on silica gel (hexane/ethyl acetate: 10/1 to 10/3) provided the title compound as a colorless oil (21.0 mg, 53% yield).

**IR** ( $\text{cm}^{-1}$ ): 2980, 2939, 2870, 1762, 1724, 1454, 1378, 1288, 1240, 1151, 1115, 1041;

**$^1\text{H}$  NMR** (400 MHz,  $\text{CDCl}_3$ )  $\delta$  4.22 (qd,  $J = 7.2, 1.8$  Hz, 2H), 2.47 – 2.40 (m, 1H), 2.36 – 2.24 (m, 2H), 2.02 – 1.93 (m, 1H), 1.71 – 1.56 (m, 1H), 1.29 (t,  $J = 7.2$  Hz, 3H), 1.09 (d,  $J = 6.3$  Hz, 3H);

**$^{13}\text{C}$  NMR** (101 MHz,  $\text{CDCl}_3$ )  $\delta$  171.8, 171.3, 63.5, 62.0, 28.9, 25.2, 23.9, 16.4, 14.3, 6.3;

**HRMS** (ESI): calculated for  $\text{C}_{10}\text{H}_{15}\text{O}_4^+$  [ $\text{M}+\text{H}$ ] $^+$   $m/z$ : 199.0965, found: 199.0962.

### Ethyl (1*S*\*,6*R*\*)-6-methyl-3-oxo-2-oxabicyclo[4.1.0]heptane-1-carboxylate (3q)

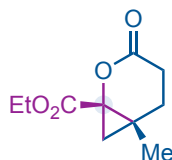

Prepared according to the general procedure C using 4-methylpent-4-enoic acid (**1q**) (22.8 mg, 1.0 equiv., 0.2 mmol). Ratio of diastereoisomers was determined to be >20:1 from the crude reaction mixture using  $^1\text{H}$  NMR spectroscopy. Purification by flash chromatography on silica gel (hexane/ethyl acetate: 10/1 to 10/3) provided the title compound as a colorless oil (19.8 mg, 50% yield).

**IR** ( $\text{cm}^{-1}$ ): 2983, 2939, 2878, 1766, 1730, 1430, 1373, 1303, 1260, 1245, 1167, 1132, 1078, 1020;

**$^1\text{H}$  NMR** (400 MHz,  $\text{CDCl}_3$ )  $\delta$  4.24 (qd,  $J = 7.2, 1.3$  Hz, 2H), 2.48 – 2.33 (m, 2H), 2.21 (dt,  $J = 13.9, 4.7$  Hz, 1H), 1.76 (m, 1H), 1.74 – 1.70 (m, 1H), 1.35 (m, 1H), 1.32 – 1.26 (m, 6H);

**$^{13}\text{C}$  NMR** (101 MHz,  $\text{CDCl}_3$ )  $\delta$  170.8, 169.2, 65.7, 61.9, 33.4, 28.9, 27.6, 22.8, 14.4, 11.9;

**HRMS** (ESI): calculated for  $\text{C}_{10}\text{H}_{14}\text{O}_4\text{Na}^+$  [ $\text{M}+\text{Na}$ ] $^+$   $m/z$ : 221.0784, found: 221.0782;

$^1\text{H}$ - $^1\text{H}$  COSY,  $^1\text{H}$ - $^{13}\text{C}$  HSQC,  $^1\text{H}$ - $^1\text{H}$  NOESY spectra were measured.

### Ethyl (1*S*\*,6*R*\*)-6-methyl-3-oxo-2-oxabicyclo[4.1.0]heptane-1-carboxylate (3r)

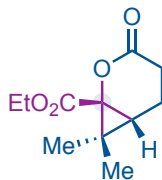

Prepared according to the general procedure C using 5-methylhex-4-enoic acid (**1r**) (26.6 mg, 1.0 equiv., 0.2 mmol). Ratio of diastereoisomers was determined to be >20:1 from the crude reaction mixture using  $^1\text{H}$  NMR spectroscopy. Purification by flash chromatography on silica gel (hexane/ethyl acetate: 10/1 to 10/3) provided the title compound as a colorless oil (25.9 mg, 61% yield).

**IR** ( $\text{cm}^{-1}$ ): 2905, 1769, 1721, 1400, 1390, 1347, 1183, 1123, 1090, 1056, 734;

**$^1\text{H}$  NMR** (400 MHz,  $\text{CDCl}_3$ )  $\delta$  4.32 – 4.15 (m, 2H), 2.45 – 2.38 (m, 1H), 2.37 – 2.31 (m, 1H), 2.30 – 2.24 (m, 1H), 1.94 (dd,  $J = 9.6, 6.8$  Hz, 1H), 1.68 – 1.58 (m, 1H), 1.32 – 1.28 (m, 6H), 1.14 (s, 3H);

**$^{13}\text{C}$  NMR** (101 MHz,  $\text{CDCl}_3$ )  $\delta$  171.7, 169.6, 67.8, 61.9, 31.7, 29.2, 28.9, 21.1, 17.8, 15.3, 14.4;

**HRMS** (ESI): calculated for  $\text{C}_{11}\text{H}_{16}\text{O}_4\text{Na}^+$  [ $\text{M}+\text{Na}$ ] $^+$   $m/z$ : 235.2450, found: 235.2452.

### Ethyl (1*S*\*,6*R*\*)-6,7,7-trimethyl-3-oxo-2-oxabicyclo[4.1.0]heptane-1-carboxylate (3s)

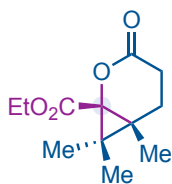

Prepared according to the general procedure C using 4,5-dimethylhex-4-enoic acid (**1s**) (28.4 mg, 1.0 equiv., 0.2 mmol). Ratio of diastereoisomers was determined to be >20:1 from the crude reaction mixture using  $^1\text{H}$  NMR spectroscopy. Purification by flash chromatography on silica gel (hexane/ethyl acetate: 10/1 to 10/3) provided the title compound as a colorless oil (19.0 mg, 42% yield).

**IR** ( $\text{cm}^{-1}$ ): 2927, 1764, 1725, 1466, 1381, 1340, 1272, 1247, 1212, 1183, 1162, 1130, 1090, 1056;

**$^1\text{H}$  NMR** (400 MHz,  $\text{CDCl}_3$ )  $\delta$  4.19 (qd,  $J = 7.2, 0.8$  Hz, 2H), 2.43 (dt,  $J = 15.9, 3.1$  Hz, 1H), 2.30 (ddd,  $J = 15.9, 11.2, 8.1$  Hz, 1H), 1.91 – 1.85 (m, 2H), 1.40 (s, 3H), 1.30 (s, 3H), 1.27 (t,  $J = 7.1$  Hz, 3H), 1.18 (s, 3H);

$^{13}\text{C}$  NMR (101 MHz,  $\text{CDCl}_3$ )  $\delta$  173.0, 168.6, 69.4, 61.5, 33.7, 31.6, 28.5, 26.7, 17.8, 17.5, 16.1, 14.4;

HRMS (ESI): calculated for  $\text{C}_{12}\text{H}_{19}\text{O}_4^+$   $[\text{M}+\text{H}]^+$   $m/z$ : 227.1278, found: 227.1277.

### Ethyl 4-oxo-3-oxatricyclo[3.2.1.0<sup>2,7</sup>]octane-2-carboxylate (**3t**)

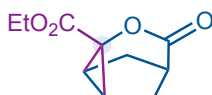

Prepared according to the general procedure C using cyclopent-3-ene-1-carboxylic acid (22.4 mg, 1.0 equiv., 0.2 mmol). Purification by flash chromatography on silica gel (hexane/ethyl acetate: 10/1 to 10/3) provided the title compound as a white solid (22.4 mg, 57% yield).

**m.p.:** 72-75 °C

**IR** ( $\text{cm}^{-1}$ ): 2982, 2941, 2876, 1764, 1747, 1466, 1448, 1380, 1335, 1310, 1268, 1200, 1128, 1100, 1051, 1021, 982, 731;

$^1\text{H}$  NMR (400 MHz,  $\text{CDCl}_3$ )  $\delta$  4.27 (q,  $J = 7.2$  Hz, 2H), 2.90 (tt,  $J = 5.0, 0.8$  Hz, 1H), 2.29 – 2.25 (m, 2H), 2.15 (ddd,  $J = 5.0, 1.5, 0.7$  Hz, 1H), 2.11 (ddd,  $J = 5.0, 1.5, 0.7$  Hz, 1H), 1.96 (d,  $J = 12.9$  Hz, 2H), 1.32 (t,  $J = 7.2$  Hz, 3H);

$^{13}\text{C}$  NMR (101 MHz,  $\text{CDCl}_3$ )  $\delta$  169.2, 168.1, 63.1, 62.1, 38.5, 27.2, 25.2, 14.3;

HRMS (ESI): calculated for  $\text{C}_{10}\text{H}_{12}\text{O}_4\text{Na}^+$   $[\text{M}+\text{Na}]^+$   $m/z$ : 219.0628, found: 219.0635.

The crystal structure of **3t** has been deposited at the Cambridge Crystallographic Data Centre, CCDC 2238826.

### Ethyl 4-oxo-3-oxatricyclo[3.3.1.0<sup>2,8</sup>]nonane-2-carboxylate (**3u**)

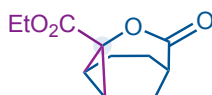

Prepared according to the general procedure C using cyclohex-3-ene-1-carboxylic acid (25.2 mg, 1.0 equiv., 0.2 mmol). Purification by flash chromatography on silica gel (hexane/ethyl acetate: 10/1 to 10/3) provided the title compound as a colorless oil (25.2 mg, 60% yield).

**IR** ( $\text{cm}^{-1}$ ): 2940, 2872, 1753, 1721, 1450, 1370, 1360, 1348, 1297, 1265, 1212, 1184, 1159, 1124, 1093, 1061, 1047, 1021, 980;

**<sup>1</sup>H NMR** (400 MHz, CDCl<sub>3</sub>) δ 4.25 (q, *J* = 7.1 Hz, 2H), 2.73 (tq, *J* = 3.1, 1.1 Hz, 1H), 2.31 – 2.22 (m, 1H), 2.15 – 2.08 (m, 1H), 2.08 – 2.00 (m, 2H), 1.94 – 1.81 (m, 3H), 1.62 – 1.54 (m, 1H), 1.31 (t, *J* = 7.2 Hz, 3H);

**<sup>13</sup>C NMR** (101 MHz, CDCl<sub>3</sub>) δ 170.6, 169.6, 64.0, 62.1, 36.6, 24.6, 21.7, 21.5, 19.8, 15.5, 14.4;

**HRMS** (ESI): calculated for C<sub>11</sub>H<sub>14</sub>O<sub>4</sub>Na<sup>+</sup> [M+Na]<sup>+</sup> *m/z*: 233.0784, found: 233.0785;

**Ethyl (1*R*\*,6*S*\*,7*S*\*)-7-((4-hydroxy-6-methoxy-7-methyl-3-oxo-1,3-dihydroisobenzofuran-5-yl)methyl)-6-methyl-3-oxo-2-oxabicyclo[4.1.0]heptane-1-carboxylate (3v)**

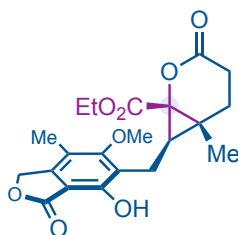

Prepared according to the general procedure C using mycophenolic acid (64.1 mg, 1.0 equiv., 0.2 mmol). The reaction was stirred for an additional period of 45 minutes at –50°C. Ratio of diastereoisomers was determined to be 3:1 from the crude reaction mixture using <sup>1</sup>H NMR spectroscopy. Purification by flash chromatography on silica gel (dichloromethane/diethyl ether: 20/1) provided the title compound as a colorless oil (28.3 mg, 35% yield).

*Major isomer:*

**IR** (cm<sup>-1</sup>): 2928, 2900, 1760, 1728, 1723, 1504, 1500, 1495, 1269, 1035, 759, 704;

**<sup>1</sup>H NMR** (500 MHz, CDCl<sub>3</sub>) δ 7.76 (s, 1H), 5.21 (s, 2H), 4.28 (qd, *J* = 7.1, 1.6 Hz, 2H), 3.77 (s, 3H), 3.16 – 3.06 (m, 2H), 2.45 – 2.30 (m, 2H), 2.20 – 2.17 (m, 1H), 2.16 (s, 3H), 1.88 (dd, *J* = 7.5, 5.4 Hz, 1H), 1.64 (td, *J* = 13.6, 3.8 Hz, 1H), 1.38 (s, 3H), 1.33 (t, *J* = 7.1 Hz, 3H);

**<sup>13</sup>C NMR** (126 MHz, CDCl<sub>3</sub>) δ 173.0, 172.2, 168.4, 164.2, 153.9, 144.9, 121.4, 117.0, 106.7, 70.2, 67.6, 61.7, 61.2, 41.3, 33.2, 30.6, 28.5, 18.1, 14.4, 14.1, 11.8;

**HRMS** (ESI): calculated for C<sub>21</sub>H<sub>24</sub>O<sub>8</sub>Na<sup>+</sup> [M+Na]<sup>+</sup> *m/z*: 427.4150, found: 427.4149;

<sup>1</sup>H-<sup>13</sup>C HSQC, <sup>1</sup>H-<sup>1</sup>H NOESY spectra were measured.



### Ethyl (1*S*\*,5*S*\*)-3-oxo-2-oxabicyclo[3.1.0]hexane-1-carboxylate (3w)

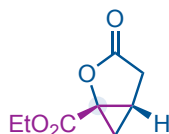

Prepared according to the general procedure C using but-3-enoic acid (17.2 mg, 1.0 equiv., 0.2 mmol). Ratio of diastereoisomers was determined to be >20:1 from the crude reaction mixture using <sup>1</sup>H NMR spectroscopy. Purification by flash chromatography on silica gel (hexane/ethyl acetate: 10/1 to 10/3) provided the title compound as a colorless oil (30.9 mg, 91% yield).

**IR** (cm<sup>-1</sup>): 2984, 2941, 1789, 1726, 1468, 1447, 1404, 1380, 1309, 1277, 1248, 1176, 1130, 1063, 1017, 958, 860;

**<sup>1</sup>H NMR** (400 MHz, CDCl<sub>3</sub>) δ 4.26 (qd, *J* = 7.2, 1.9 Hz, 2H), 2.99 (ddd, *J* = 18.9, 7.1, 1.1 Hz, 1H), 2.59 (dd, *J* = 18.9, 1.2 Hz, 1H), 2.24 (dddd, *J* = 9.1, 7.1, 6.1, 1.1 Hz, 1H), 1.87 (ddd, *J* = 9.1, 6.7, 1.1 Hz, 1H), 1.30 (t, *J* = 7.2 Hz, 3H), 1.07 – 1.03 (m, 1H);

**<sup>13</sup>C NMR** (101 MHz, CDCl<sub>3</sub>) δ 175.0, 168.8, 63.7, 62.1, 33.1, 23.3, 20.7, 14.3;

**HRMS** (ESI): calculated for C<sub>8</sub>H<sub>10</sub>O<sub>4</sub>Na<sup>+</sup> [M+Na]<sup>+</sup> *m/z*: 193.0471, found: 193.0466.

### Ethyl (1*S*\*,5*R*\*,6*R*\*)-6-methyl-3-oxo-2-oxabicyclo[3.1.0]hexane-1-carboxylate (3x)

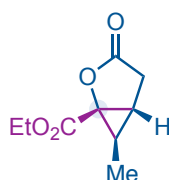

Prepared according to the general procedure C using (*E*)-pent-3-enoic acid (20.0 mg, 1.0 equiv., 0.2 mmol). Ratio of diastereoisomers was determined to be >20:1 from the crude reaction mixture using <sup>1</sup>H NMR spectroscopy. Purification by flash chromatography on silica gel (hexane/ethyl acetate: 10/1 to 10/3) provided the title compound as a colorless oil (29.4 mg, 80% yield).

**IR** (cm<sup>-1</sup>): 2984, 2938, 1791, 1728, 1463, 1414, 1373, 1341, 1290, 1265, 1225, 1135, 1110, 1094, 1023, 924, 719;

**<sup>1</sup>H NMR** (400 MHz, CDCl<sub>3</sub>) δ 4.28 (q, *J* = 7.1 Hz, 2H), 2.94 (dd, *J* = 18.7, 7.3 Hz, 1H), 2.60 (dd, *J* = 18.7, 1.1 Hz, 1H), 2.03 (ddd, *J* = 6.9, 5.7, 1.0 Hz, 1H), 1.36 – 1.28 (m, 7H);

**<sup>13</sup>C NMR** (101 MHz, CDCl<sub>3</sub>) δ 175.1, 167.8, 67.8, 61.9, 33.3, 32.9, 26.7, 14.3, 11.5;

**HRMS** (ESI): calculated for  $C_9H_{12}O_4Na^+$   $[M+Na]^+$   $m/z$ : 184.1910, found: 184.1912.

**Ethyl (1*R*\*,5*R*\*,6*S*\*)-3-oxo-6-phenyl-2-oxabicyclo[3.1.0]hexane-1-carboxylate (3y)**

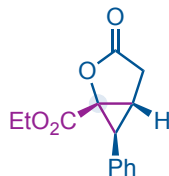

Prepared according to the general procedure C using (*E*)-4-Phenylbut-3-enoic acid (32.4 mg, 1.0 equiv., 0.2 mmol). Ratio of diastereoisomers was determined to be >20:1 from the crude reaction mixture using  $^1H$  NMR spectroscopy. Purification by flash chromatography on silica gel (hexane/ethyl acetate: 10/1 to 10/3) provided the title compound as a white solid (36.9 mg, 75% yield).

**mp**: 94-98 °C

**IR** ( $cm^{-1}$ ): 2980, 1796, 1736, 1374, 1222, 1128, 1051, 824, 743;

**$^1H$  NMR** (400 MHz,  $CDCl_3$ )  $\delta$  7.35 – 7.23 (m, 5H), 4.01 (qd,  $J = 7.1, 2.1$  Hz, 2H), 3.15 (dd,  $J = 18.4, 6.8$  Hz, 1H), 2.86 – 2.78 (m, 2H), 2.63 (d,  $J = 6.8$  Hz, 1H), 0.98 (t,  $J = 7.1$  Hz, 3H);

**$^{13}C$  NMR** (101 MHz,  $CDCl_3$ )  $\delta$  174.6, 166.0, 132.5, 128.9, 128.5, 127.9, 68.8, 61.7, 41.7, 33.3, 23.5, 13.8;

**HRMS** (ESI): calculated for  $C_{14}H_{14}O_4Na^+$   $[M+Na]^+$   $m/z$ : 269.0784, found: 269.0781.

The crystal structure of **3y** has been deposited at the Cambridge Crystallographic Data Centre, CCDC 2192080.

**7. General procedure D for intermolecular reaction optimization.**

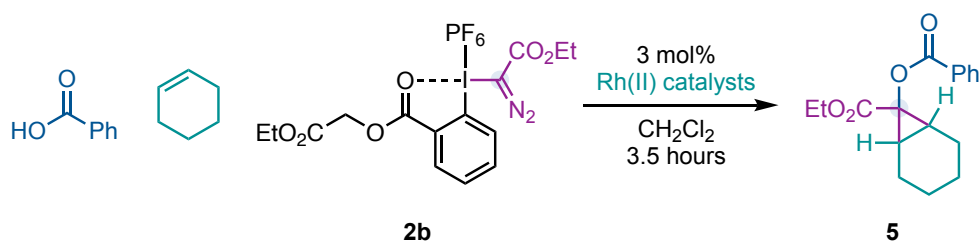

To a 10 mL oven-dried tube equipped with a stirring bar were added the corresponding Rh catalyst (3 mol%) and additive. The tube was sealed before being evacuated and backfilled with argon three times. Degassed dichloromethane (0.5 mL) and cyclohexene were added and the resulting mixture was cooled at the indicated temperature. Then, a solution of hypervalent iodine reagent **2b** and benzoic acid in degassed

dichloromethane (1 mL) were added dropwise to the reaction flask during 30 min using a syringe pump at the indicated temperature. Then the resulting reaction mixture was allowed to warm to room temperature in 3 hours. The solution was extracted with saturated aqueous solution of NaHCO<sub>3</sub> (3 mL) and dichloromethane (3 x 3 mL) following by filtering through a short plug of anhydrous Na<sub>2</sub>SO<sub>4</sub>. Solvent was removed under *vacuum* and <sup>1</sup>H NMR yield was measured using dibromomethane (7 μL, 0.1 mmol, 1.0 equiv.) as internal standard.

**Table S2.** Optimization studies for intramolecular reaction.

| Entry | Stoichiometry<br>(Acid : alkene : <b>2a</b> ) | Rh catalyst                        | Additive (equiv.)                   | Temperature | Yield <b>5</b> [%] |
|-------|-----------------------------------------------|------------------------------------|-------------------------------------|-------------|--------------------|
| 1     | 1 : 1 : 1.3                                   | Rh <sub>2</sub> (esp) <sub>2</sub> | NaHCO <sub>3</sub> (2)              | -50 °C      | traces             |
| 2     | 1 : 5 : 1.3                                   | Rh <sub>2</sub> (esp) <sub>2</sub> | NaHCO <sub>3</sub> (2)              | -50 °C      | 25                 |
| 3     | 1 : 10 : 1.3                                  | Rh <sub>2</sub> (esp) <sub>2</sub> | NaHCO <sub>3</sub> (2)              | -50 °C      | 23                 |
| 4     | 1 : 5 : 1.3                                   | Rh <sub>2</sub> (esp) <sub>2</sub> | NaHCO <sub>3</sub> (10)             | -50 °C      | 24                 |
| 5     | 1 : 5 : 1.3                                   | Rh <sub>2</sub> (esp) <sub>2</sub> | Na <sub>2</sub> CO <sub>3</sub> (2) | -50 °C      | 20                 |
| 6     | 1 : 5 : 1.3                                   | Rh <sub>2</sub> (esp) <sub>2</sub> | K <sub>3</sub> PO <sub>4</sub> (2)  | -50 °C      | 21                 |
| 7     | 1 : 5 : 1.3                                   | Rh <sub>2</sub> (OAc) <sub>2</sub> | NaHCO <sub>3</sub> (2)              | -50 °C      | 0                  |
| 8     | 1 : 5 : 1.3                                   | Rh <sub>2</sub> (Oct) <sub>2</sub> | NaHCO <sub>3</sub> (2)              | -50 °C      | 0                  |
| 9     | 1 : 5 : 1.3                                   | Rh <sub>2</sub> (Adc) <sub>2</sub> | NaHCO <sub>3</sub> (2)              | -50 °C      | 20                 |
| 10    | 2 : 5 : 1                                     | Rh <sub>2</sub> (esp) <sub>2</sub> | NaHCO <sub>3</sub> (2)              | -50 °C      | 20                 |
| 11    | 5 : 5 : 1                                     | Rh <sub>2</sub> (esp) <sub>2</sub> | NaHCO <sub>3</sub> (2)              | -50 °C      | 22                 |
| 12    | 5 : 2 : 1                                     | Rh <sub>2</sub> (esp) <sub>2</sub> | NaHCO <sub>3</sub> (2)              | -50 °C      | 19                 |
| 13    | 1 : 5 : 1.3                                   | Rh <sub>2</sub> (esp) <sub>2</sub> | NaHCO <sub>3</sub> (2)              | -78 °C      | 15                 |
| 14    | 1 : 5 : 1.3                                   | Rh <sub>2</sub> (esp) <sub>2</sub> | NaHCO <sub>3</sub> (2)              | -20 °C      | 28                 |
| 15    | 1 : 5 : 1.3                                   | Rh <sub>2</sub> (esp) <sub>2</sub> | NaHCO <sub>3</sub> (2)              | 0 °C        | 30                 |

### Ethyl-7-(benzyloxy)bicyclo[4.1.0]heptane-7-carboxylate (**5**)

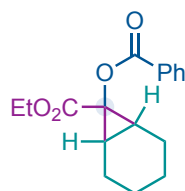

To a 10 mL oven-dried tube equipped with a stirring bar were added Rh<sub>2</sub>(esp)<sub>2</sub> (3 mol%) and additive. The tube was sealed before being evacuated and backfilled with argon three times. Degassed dichloromethane (0.5 mL) and cyclohexene (51 μL, 0.5 mmol, 5 equiv.) were added and the resulting mixture was cooled at 0°C. Then, a solution of hypervalent iodine reagent **2b** (77 mg, 0.13 mmol, 1.3 equiv.) and benzoic acid (12.2 mg, 0.1 mmol, 1 equiv.) in degassed dichloromethane (1 mL) were added dropwise to the reaction flask during 30 min using a syringe pump. Then the resulting reaction mixture was allowed to warm to

room temperature in 3 hours. The solution was extracted with saturated aqueous solution of NaHCO<sub>3</sub> (3 mL) and dichloromethane (3 x 3 mL) following by filtering through a short plug of anhydrous Na<sub>2</sub>SO<sub>4</sub>. Ratio of diastereoisomers was determined to be >20:1 from the crude reaction mixture using <sup>1</sup>H NMR spectroscopy. Purification by flash chromatography on silica gel (hexane/ethyl acetate: 40/1 to 10/1) provided the title compound as a colorless oil (5.6 mg, 30% yield).

<sup>1</sup>H NMR (500 MHz, CDCl<sub>3</sub>) δ 8.03 – 8.01 (m, 2H), 7.57 (ddt, *J* = 8.7, 7.2, 1.3 Hz, 1H), 7.44 (td, *J* = 7.5, 1.0 Hz, 2H), 4.21 (q, *J* = 7.1 Hz, 2H), 2.01 – 1.88 (m, 2H), 1.79 (m, *J* = 5.4 Hz, 2H), 1.79 – 1.74 (m, 2H), 1.58 (m, *J* = 4.6 Hz, 2H), 1.30 – 1.25 (m, 2H), 1.21 (t, *J* = 7.1 Hz, 3H);

<sup>1</sup>H NMR (500 MHz, CD<sub>3</sub>OD) δ 8.00 – 7.97 (m, 2H), 7.74 – 7.70 (m, 1H), 7.50 – 7.46 (m, 2H), 4.18 (q, *J* = 7.1 Hz, 2H), 2.01 – 1.93 (m, 2H), 1.80 – 1.77 (m, 2H), 1.76 – 1.70 (m, 2H), 1.62 – 1.55 (m, 2H), 1.34 – 1.25 (m, 2H), 1.18 (t, *J* = 7.1 Hz, 3H);

<sup>13</sup>C NMR (126 MHz, CDCl<sub>3</sub>) δ 168.8, 166.7, 133.3, 129.9, 129.8, 128.5, 63.5, 61.1, 25.7, 20.6, 17.4, 14.4;

HRMS (ESI): calculated for C<sub>17</sub>H<sub>20</sub>O<sub>4</sub>Na<sup>+</sup> [M+Na]<sup>+</sup> *m/z*: 311.1254, found: 311.1259;

<sup>1</sup>H-<sup>1</sup>H COSY, <sup>1</sup>H-<sup>13</sup>C HSQC, <sup>1</sup>H-<sup>13</sup>C HMBC spectra were measured;

**Note:** We were unable to determine the relative configuration of **5** since NOESY and GOESY experiments were not conclusive.

## 8. Derivatizations of compound **3a**.

### ▪ Methylation with MeI<sup>13</sup>

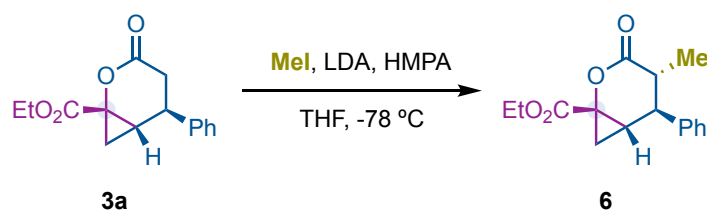

**Ethyl (1S\*,4R\*,5S\*,6S\*)-4-methyl-3-oxo-5-phenyl-2-oxabicyclo[4.1.0]heptane-1-carboxylate (6):** To a solution of LDA (420 μL, 0.42 mmol, 1M in THF) and HMPA (230 μL, 1.38 mmol) in THF (1.4 mL) at -78 °C was added dropwise a solution of **3a** (90 mg, 0.35 mmol) in THF (0.5 mL). The mixture was stirred at -78 °C for 50 min, then iodomethane (88 μL, 1.4 mmol) was added. The mixture was stirred for 30 min at -78 °C and was allowed to warm up to -20 °C over a period of 2 h. The reaction was quenched with

ammonium chloride and extracted with ethyl acetate. The combined organic layers were dried over Na<sub>2</sub>SO<sub>4</sub> and concentrated under reduced pressure. Ratio of diastereoisomers was determined to be >20:1 from the crude reaction mixture using <sup>1</sup>H NMR spectroscopy. The crude product was purified by flash column chromatography to afford the title compound as a colorless oil (77.7 mg, 81%), *R<sub>f</sub>* = 0.31 (30% ethyl acetate in hexane).

<sup>1</sup>H NMR (400 MHz, CDCl<sub>3</sub>) δ 7.42 – 7.35 (m, 2H), 7.34 – 7.28 (m, 1H), 7.26 – 7.21 (m, 2H), 4.27 (qd, *J* = 7.1, 2.5 Hz, 2H), 2.71 (dq, *J* = 12.1, 6.8 Hz, 1H), 2.51 (dd, *J* = 12.2, 7.1 Hz, 1H), 2.12 (dt, *J* = 9.7, 7.2 Hz, 1H), 1.88 (dd, *J* = 9.7, 6.0 Hz, 1H), 1.37 (ddd, *J* = 7.3, 6.0, 0.6 Hz, 1H), 1.32 (t, *J* = 7.1 Hz, 3H), 0.92 (d, *J* = 6.8 Hz, 3H).

<sup>13</sup>C NMR (101 MHz, CDCl<sub>3</sub>) δ 174.4, 170.6, 140.5, 129.3, 127.8, 127.8, 62.3, 60.0, 49.6, 40.2, 30.2, 24.9, 14.3, 13.2.

HRMS (ESI): calculated for C<sub>16</sub>H<sub>19</sub>O<sub>4</sub><sup>+</sup> [M+H]<sup>+</sup> *m/z*: 275.1278, found: 275.1291;

<sup>1</sup>H-<sup>13</sup>C HSQC, <sup>1</sup>H-<sup>1</sup>H NOESY spectra were measured.

#### ▪ Ring opening with piperidine<sup>14</sup>

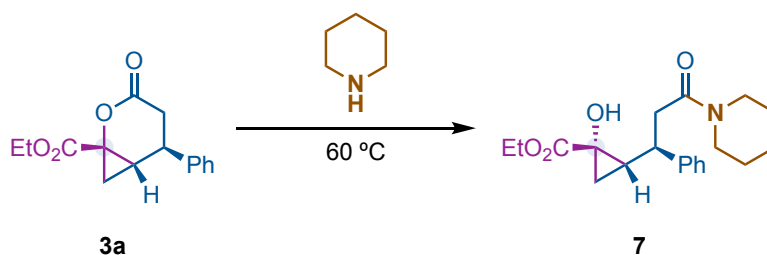

#### Ethyl (1*R*\*,2*S*\*)-2-((*S*\*)-3-ethoxy-3-oxo-1-phenylpropyl)-1-hydroxycyclopropane-1-carboxylate (**7**):

A 10 mL oven-dried tube equipped with a magnetic stirring bar was charged with **3a** (26.0 mg, 0.1 mmol) and piperidine (85 mg, 1.0 mmol). The mixture was stirred at 60 °C for 7 h until complete consumption of the starting material (monitored by TLC). The crude mixture was directly purified by column chromatography to afford the title compound as a colorless oil (31.0 mg, 90%); *R<sub>f</sub>* = 0.55 (dichloromethane/diethyl ether: 2/1).

<sup>1</sup>H NMR (400 MHz, CDCl<sub>3</sub>) δ 7.37 – 7.25 (m, 4H), 7.26 – 7.21 (m, 1H), 6.43 (s, 1H), 4.19 (qt, *J* = 7.2, 3.6 Hz, 2H), 3.63 (ddd, *J* = 13.2, 6.7, 4.3 Hz, 1H), 3.51 (ddd, *J* = 13.6, 7.2, 4.5 Hz, 1H), 3.39 (t, *J* = 5.6 Hz, 2H), 3.16 (td, *J* = 11.1, 3.0 Hz, 1H), 2.83 (dd, *J* = 16.3, 11.2 Hz, 1H), 2.58 (dd, *J* = 16.3, 3.1 Hz, 1H), 1.68 (dd, *J* = 10.0, 7.7 Hz, 1H), 1.65 – 1.45 (m, 6H), 1.40 (dd, *J* = 10.0, 5.2 Hz, 1H), 1.29 (t, *J* = 7.1 Hz, 3H), 0.76 (dd, *J* = 7.7, 5.2 Hz, 1H);

$^{13}\text{C}$  NMR (101 MHz,  $\text{CDCl}_3$ )  $\delta$  175.3, 170.5, 145.0, 128.8, 127.6, 126.7, 61.2, 57.6, 47.0, 43.4, 41.7, 38.9, 33.5, 26.6, 25.6, 24.5, 22.4, 14.5;

HRMS (ESI): calculated for  $\text{C}_{20}\text{H}_{28}\text{NO}_4^+$   $[\text{M}+\text{H}]^+$   $m/z$ : 346.2013, found: 346.2011;

$^1\text{H}$ - $^1\text{H}$  COSY,  $^1\text{H}$ - $^{13}\text{C}$  HSQC,  $^1\text{H}$ - $^1\text{H}$  NOESY spectra were measured.

▪ Ring opening with  $\text{HBF}_4 \cdot \text{Et}_2\text{O}$

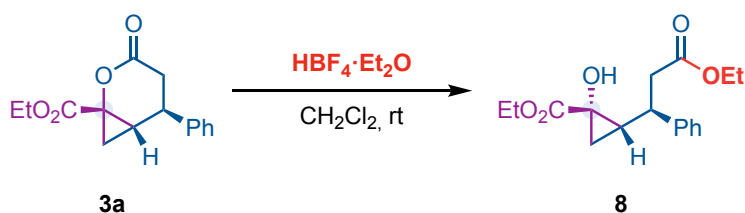

**Ethyl (1*S*<sup>\*</sup>)-2-((*R*<sup>\*</sup>)-3-ethoxy-3-oxo-1-phenylpropyl)-1-hydroxycyclopropane-1-carboxylate (8):** A 10 mL oven-dried tube equipped with a magnetic stirring bar was charged with **3a** (13.0 mg, 0.05 mmol). The vial was sealed before being evacuated and backfilled with argon three times. Then degassed dichloromethane (0.5 mL) was added. Then tetrafluoroboric acid diethyl ether complex (75  $\mu\text{L}$ , 0.5 mmol, 51-57% in  $\text{Et}_2\text{O}$ , 10 equiv.) was added to the solution. The mixture was stirred at room temperature for 48 h until complete consumption of the starting material (monitored by TLC). The crude mixture was directly purified by column chromatography to afford the title compound as a colorless oil (9.2 mg, 60%),  $R_f$  = 0.23 (dichloromethane/ethyl acetate: 25/1).

$^1\text{H}$  NMR (400 MHz,  $\text{CDCl}_3$ )  $\delta$  7.37 – 7.28 (m, 2H), 7.30 – 7.20 (m, 3H), 4.43 (s, 1H), 4.21 (qd,  $J$  = 7.1, 3.8 Hz, 2H), 4.13 (qd,  $J$  = 7.2, 1.0 Hz, 2H), 3.06 (td,  $J$  = 9.5, 6.3 Hz, 1H), 2.80 – 2.69 (m, 2H), 1.73 (td,  $J$  = 10.1, 7.7 Hz, 1H), 1.43 (dd,  $J$  = 10.0, 5.5 Hz, 1H), 1.29 (t,  $J$  = 7.2 Hz, 3H), 1.22 (t,  $J$  = 7.1 Hz, 3H), 0.81 (dd,  $J$  = 7.7, 5.5 Hz, 1H);

$^{13}\text{C}$  NMR (101 MHz,  $\text{CDCl}_3$ )  $\delta$  174.6, 173.7, 143.7, 128.8, 127.6, 126.9, 61.5, 61.3, 58.3, 42.5, 38.9, 33.0, 21.4, 14.4, 14.2;

HRMS (ESI): calculated for  $\text{C}_{17}\text{H}_{22}\text{O}_5\text{Na}^+$   $[\text{M}+\text{Na}]^+$   $m/z$ : 329.1359, found: 329.1355.

## 9. X-Ray crystal data of **3t** and **3y**.

**Single-crystal X-Ray diffraction analysis of 3t:** The crystal of **3t** used for the single-crystal X-ray diffraction experiment was grown by slow evaporation of a solution of **3t** in dichloromethane and hexane

at room temperature. An ORTEP diagram of the crystal structure of **3t** is shown below (CCDC No: 2238826):

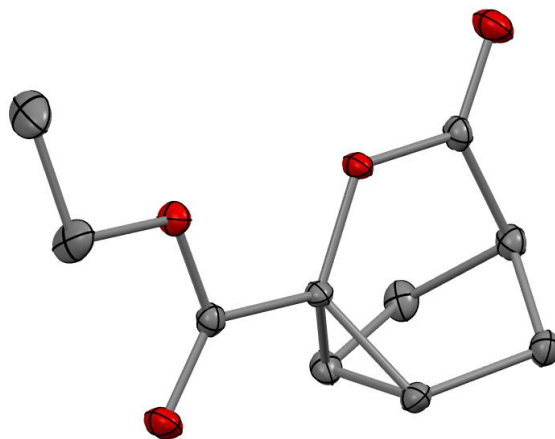

**Table S3.** Crystal data and structure refinement for **3t**.

|                                 |                                       |                  |
|---------------------------------|---------------------------------------|------------------|
| Identification code             | EPM454B_twin1_hklf5                   |                  |
| Empirical formula               | C10 H12 O4                            |                  |
| Formula weight                  | 196.20                                |                  |
| Temperature                     | 100(2)K                               |                  |
| Wavelength                      | 0.71073 Å                             |                  |
| Crystal system                  | monoclinic                            |                  |
| Space group                     | P 21/n                                |                  |
| Unit cell dimensions            | a = 13.1462(5)Å                       | a = 90°.         |
|                                 | b = 9.0845(2)Å                        | b = 112.482(4)°. |
|                                 | c = 16.6193(5)Å                       | g = 90°.         |
| Volume                          | 1833.95(11) Å <sup>3</sup>            |                  |
| Z                               | 8                                     |                  |
| Density (calculated)            | 1.421 Mg/m <sup>3</sup>               |                  |
| Absorption coefficient          | 0.110 mm <sup>-1</sup>                |                  |
| F(000)                          | 832                                   |                  |
| Crystal size                    | 0.700 x 0.400 x 0.300 mm <sup>3</sup> |                  |
| Theta range for data collection | 3.681 to 31.197°.                     |                  |
| Index ranges                    | -19<=h<=19,-13<=k<=13,-24<=l<=23      |                  |
| Reflections collected           | 9762                                  |                  |
| Independent reflections         | 9762[R(int) = ?]                      |                  |
| Completeness to theta =31.197°  | 94.3%                                 |                  |

|                                      |                                      |
|--------------------------------------|--------------------------------------|
| Absorption correction                | Multi-scan                           |
| Max. and min. transmission           | 1.00 and 0.82                        |
| Refinement method                    | Full-matrix least-squares on $F^2$   |
| Data / restraints / parameters       | 9762/ 0/ 256                         |
| Goodness-of-fit on $F^2$             | 1.076                                |
| Final R indices [ $I > 2\sigma(I)$ ] | $R_1 = 0.0640$ , $wR_2 = 0.1963$     |
| R indices (all data)                 | $R_1 = 0.0760$ , $wR_2 = 0.2209$     |
| Largest diff. peak and hole          | 0.989 and -1.125 $e.\text{\AA}^{-3}$ |

**Single-crystal X-Ray diffraction analysis of 3y:** The crystal of **3y** used for the single-crystal X-ray diffraction experiment was grown by slow evaporation of a solution of **3y** in dichloromethane and hexane at room temperature. An ORTEP diagram of the crystal structure of **3y** is shown below (CCDC No: 2192080):

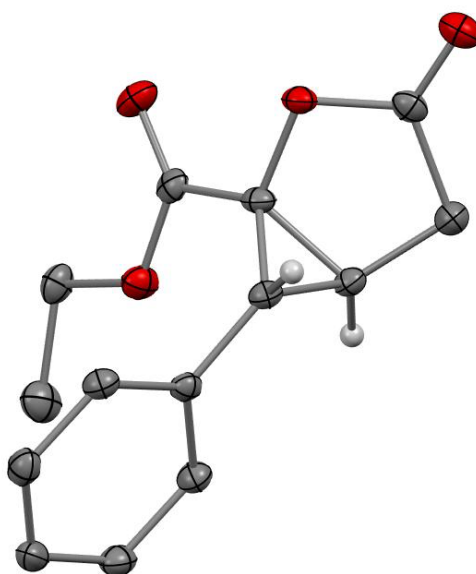

**Table S4.** Crystal data and structure refinement for **3y** .

|                     |                                                |
|---------------------|------------------------------------------------|
| Identification code | mo_EPM509I_0m                                  |
| Empirical formula   | C <sub>14</sub> H <sub>14</sub> O <sub>4</sub> |
| Formula weight      | 246.25                                         |
| Temperature         | 100(2)K                                        |
| Wavelength          | 0.71073 Å                                      |
| Crystal system      | monoclinic                                     |
| Space group         | P 21                                           |



|                                   |                                                     |                                          |
|-----------------------------------|-----------------------------------------------------|------------------------------------------|
| Unit cell dimensions              | a = 10.147(3)Å<br>b = 5.7189(19)Å<br>c = 11.362(4)Å | a = 90°.<br>b = 115.309(7)°.<br>g = 90°. |
| Volume                            | 596.0(3) Å <sup>3</sup>                             |                                          |
| Z                                 | 2                                                   |                                          |
| Density (calculated)              | 1.372 Mg/m <sup>3</sup>                             |                                          |
| Absorption coefficient            | 0.101 mm <sup>-1</sup>                              |                                          |
| F(000)                            | 260                                                 |                                          |
| Crystal size                      | 0.400 x 0.250 x 0.150 mm <sup>3</sup>               |                                          |
| Theta range for data collection   | 2.220 to 28.064°.                                   |                                          |
| Index ranges                      | -13<=h<=13,-7<=k<=7,-15<=l<=14                      |                                          |
| Reflections collected             | 7235                                                |                                          |
| Independent reflections           | 2863[R(int) = 0.0281]                               |                                          |
| Completeness to theta = 28.064°   | 99.1%                                               |                                          |
| Absorption correction             | Multi-scan                                          |                                          |
| Max. and min. transmission        | 0.74 and 0.64                                       |                                          |
| Refinement method                 | Full-matrix least-squares on F <sup>2</sup>         |                                          |
| Data / restraints / parameters    | 2863/ 1/ 164                                        |                                          |
| Goodness-of-fit on F <sup>2</sup> | 1.047                                               |                                          |
| Final R indices [I>2sigma(I)]     | R1 = 0.0337, wR2 = 0.0781                           |                                          |
| R indices (all data)              | R1 = 0.0386, wR2 = 0.0804                           |                                          |
| Flack parameter                   | x = 0.1(5)                                          |                                          |
| Largest diff. peak and hole       | 0.185 and -0.178 e.Å <sup>-3</sup>                  |                                          |

## 10. Computational details

The DFT calculations were performed with GAUSSIAN 16 Program.<sup>15</sup> For the geometry optimization, the B3LYP functional<sup>16</sup> with Grimme's third generation empirical dispersion correction including Becke-Johanson damping was used,<sup>17</sup> which is denoted as B3LYP-D3BJ. The SDD basis sets with associated effective core potential (ECP)<sup>18</sup> was used for Rh and Iodine, whereas the 6-31G\* basis set were used for other atoms.<sup>19</sup> All geometry optimizations were performed with the IEFPCM implicit solvation method as implemented in GAUSSIAN 16 program with dichloromethane as solvent.<sup>20</sup> Hessian calculation were performed to confirm the stationary points; minima with no imaginary frequency and single imaginary frequency for the transition states (TSs). The TSs were further confirmed by intrinsic reaction coordinate (IRC) calculations.<sup>21</sup> The electronic energies of the stationary points were further computed using an improved basis set. The cc-PVTZ-PP<sup>22</sup> basis set was used for Rh and Iodine, where triple-zeta cc-PVTZ

basis set was used with effective core potentials (ECP28MDF). Both triple-zeta basis set (ECP28MDF\_VTZ) and effective core potentials were downloaded from the Stuttgart/Cologne Group website.<sup>23</sup> For other atoms cc-PVTZ basis set was used.<sup>24</sup> The quasi-harmonic corrections proposed by Grimme with a cutoff of 100 cm<sup>-1</sup> were employed to free energies, and correction for standard state of 1 M for all species were also applied using GoodVibes v3.0.1 program.<sup>25</sup>

The natural population analysis was used for computing charges on the atoms.<sup>26</sup> The charge decomposition analysis (CDA) proposed by Frenking<sup>27</sup> was used to analyze the Rh-carbene bonds using the MultiWFN-3.8 program.<sup>28</sup> For CDA Rh<sub>2</sub>(OAc)<sub>4</sub> and carbene/Carbynoids were taken as two fragments. The electrophilicity was estimated using global electrophilicity Index ( $\omega$ ) =  $\mu^2/2\eta$ , where  $\mu$ (electronegativity) =  $(\epsilon_{\text{LUMO}} + \epsilon_{\text{HOMO}})/2$ ;  $\eta$ (hardness) =  $\epsilon_{\text{LUMO}} - \epsilon_{\text{HOMO}}$ .<sup>29</sup> For analysis was performed using the method used for energy calculation, i.e., PCM<sub>CH<sub>2</sub>Cl<sub>2</sub></sub>/B3LYP-D3BJ/cc-PVTZ-PP(Rh,I),cc-PVTZ(H,C,O,F,P). The crystal structure of the Rh<sub>2</sub>(esp)<sub>2</sub> was used for the catalyst structure. To generate other stationary points, the crystal structure of Rh<sub>2</sub>(esp)<sub>2</sub>-carbene complex was used as template (that is, the conformation of ligands is kept like the crystal structure). The molecular geometries in the Figures were generated using open source Pymol program.<sup>30</sup>

### • Conversion from intermediate C to intermediate E

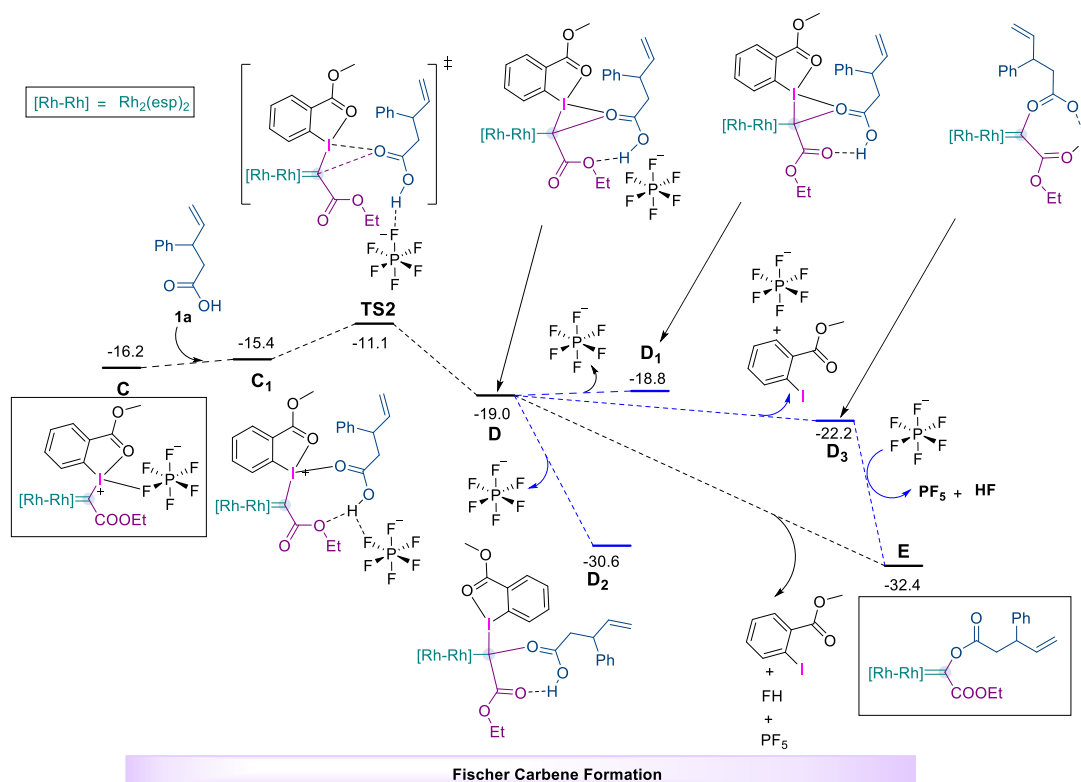

**Figure S3.** Free energy profile for Rh-carbynoid to Fischer-carbene conversion at  $\text{PCM}_{\text{CH}_2\text{Cl}_2}/\text{B3LYP-D3BJ}/\text{cc-PVTZ-PP}(\text{Rh},\text{I}),\text{cc-PVTZ}(\text{H},\text{C},\text{O},\text{F},\text{P})//\text{PCM}_{\text{CH}_2\text{Cl}_2}/\text{B3LYP-D3BJ}/\text{SDD}(\text{Rh},\text{I}),6-31\text{G}^*(\text{H},\text{C},\text{O},\text{F},\text{P})$ .

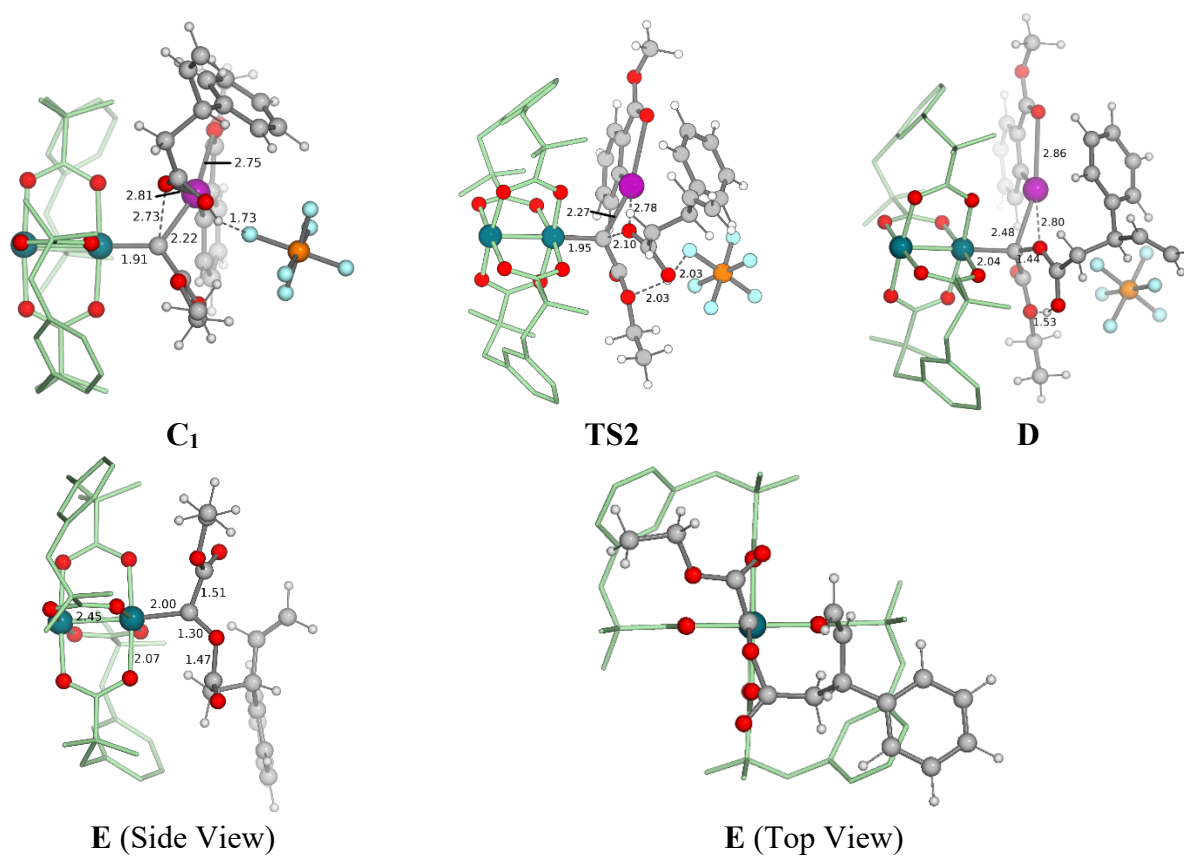

**Figure S4.** Optimized geometries of stationary points involved in conversion on intermediate C to E.

• Competition between acid and olefin addition to C

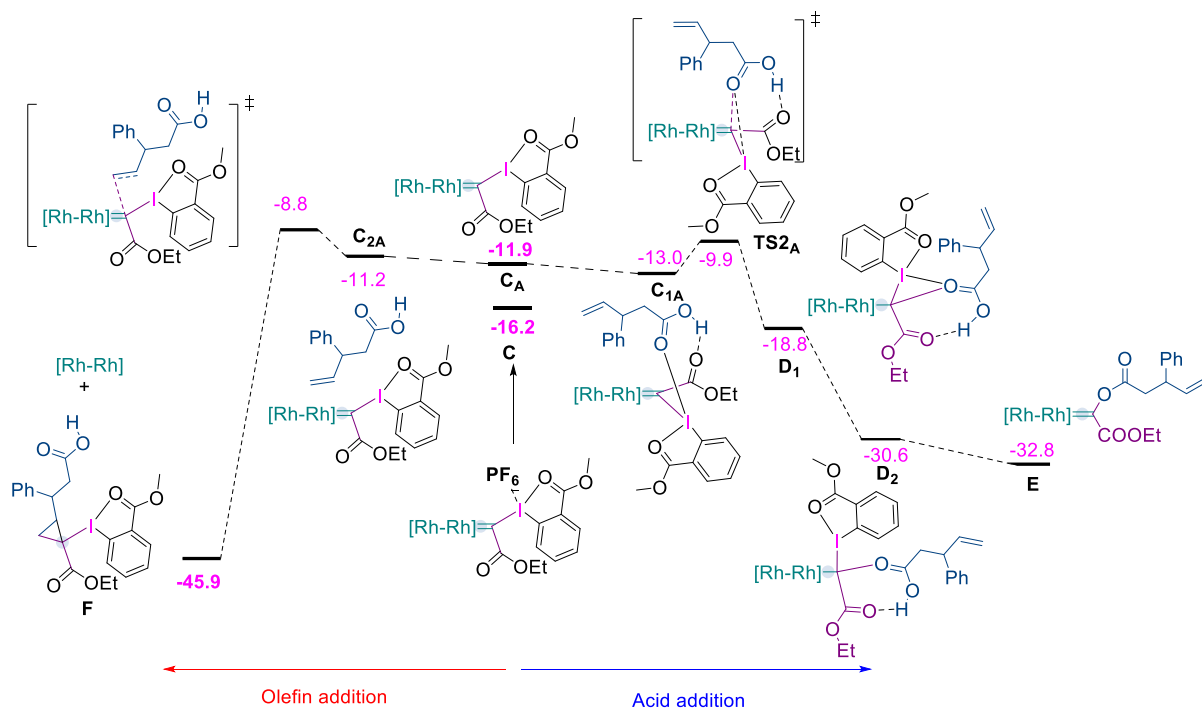

**Figure S5.** Comparison of potential energy surface for acid and olefin addition to Rh-carbynoid intermediate without PF<sub>6</sub><sup>-</sup> at PCM<sub>CH2Cl2</sub>/B3LYP-D3BJ/cc-PVTZ-PP(Rh,I),cc-PVTZ(H,C,O,F,P)// PCM<sub>CH2Cl2</sub>/B3LYP-D3BJ/SDD(Rh,I),6-31G\*(H,C,O,F,P).

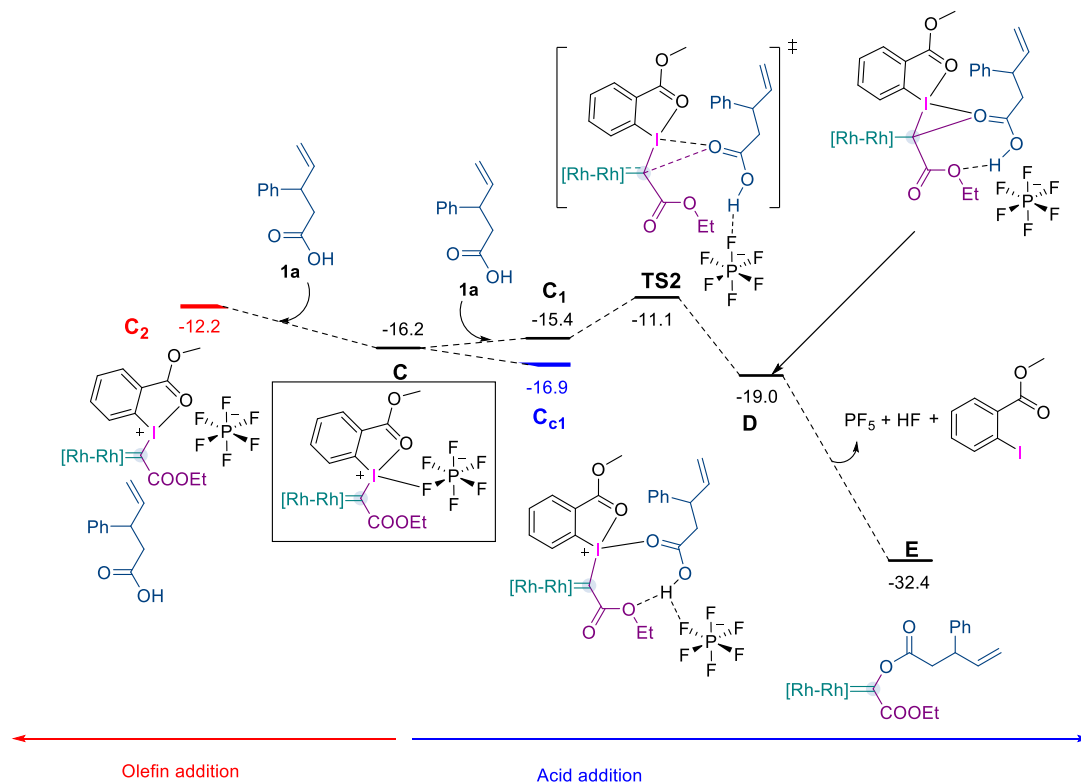

**Figure S6.** Comparison of potential energy surface for acid and olefin addition to Rh-carbynoid intermediate at PCM<sub>CH2Cl2</sub>/B3LYP-D3BJ/cc-PVTZ-PP(Rh,I),cc-PVTZ(H,C,O,F,P)// PCM<sub>CH2Cl2</sub>/B3LYP-D3BJ/SDD(Rh,I),6-

31G\*(H,C,O,F,P). The TS corresponding to olefin addition could not be optimized even after repeated attempts, probably due to low barrier (as clear from previous Figure) and flat potential energy surface near the TS.

The carbynoid complex **C** reacts with the carboxylic group rather than with the olefin group present in the substrate (**1a**). To understand this, we explored the pathway for olefin addition to **C**. However, we could not locate the TS for the olefin addition. Hence, we explored the TSs in absence of PF<sub>6</sub><sup>-</sup> (Figure S5). The transition state (TS) for alkenyl carboxylic acid (**1a**) addition through carboxylic acid (in absence of PF<sub>6</sub><sup>-</sup>) is lower in energy than in addition through olefin by 1.1 kcal/mol (Figure S5). It explains the experimental findings, however, the difference in energy of two TSs quantitatively cannot explain the exclusive carboxylic group addition to **C**. To further substantiate we explored energies of the pre-TS complexes (**C**<sub>2</sub> and **C**<sub>c1</sub>) of both competing pathways (Figure S6). The adduct between **C** and **1a** for olefin addition (**C**<sub>2</sub>) is higher in energy than the adduct for acid addition (**C**<sub>c1</sub>) by 4.7 kcal/mol (Figure S6), whereas the difference is only 1.8 kcal/mol for adducts without PF<sub>6</sub><sup>-</sup> (Figure 3, **C**<sub>1A</sub> and **C**<sub>2A</sub>). Although, the corresponding TSs from the adducts (**C**<sub>2</sub> and **C**<sub>c1</sub>) could not be optimized (probably due to the low barrier for TS and flat PES near the TS), but their energies explain the exclusive reaction of complex **C** with the carboxylic group.

- **Comparison of Metallo-Carbenes/Carbynoids**

**Table S5.** Orbital energies and global electrophilicity index.

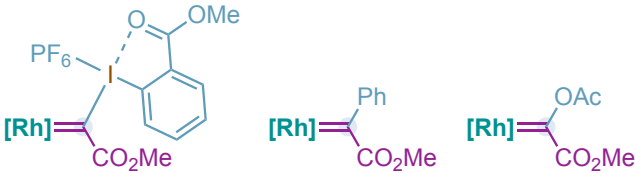

|                        |        |        |        |
|------------------------|--------|--------|--------|
| donation (d)           | 0.245  | 0.275  | 0.313  |
| back donation (b)      | 0.123  | 0.037  | 0.066  |
| d-b                    | 0.122  | 0.238  | 0.247  |
| ε <sub>LUMO</sub> (eV) | -4.083 | -3.496 | -2.931 |
| ω                      | 5.78   | 4.68   | 3.30   |

<sup>a</sup> Electrophilicity Index ( $\omega$ ) =  $\mu^2/2\eta$ ; where,  $\mu$ (electronegativity) =  $(\epsilon_{LUMO} + \epsilon_{HOMO})/2$ ;  $\eta$ (hardness) =  $\epsilon_{LUMO} - \epsilon_{HOMO}$ .

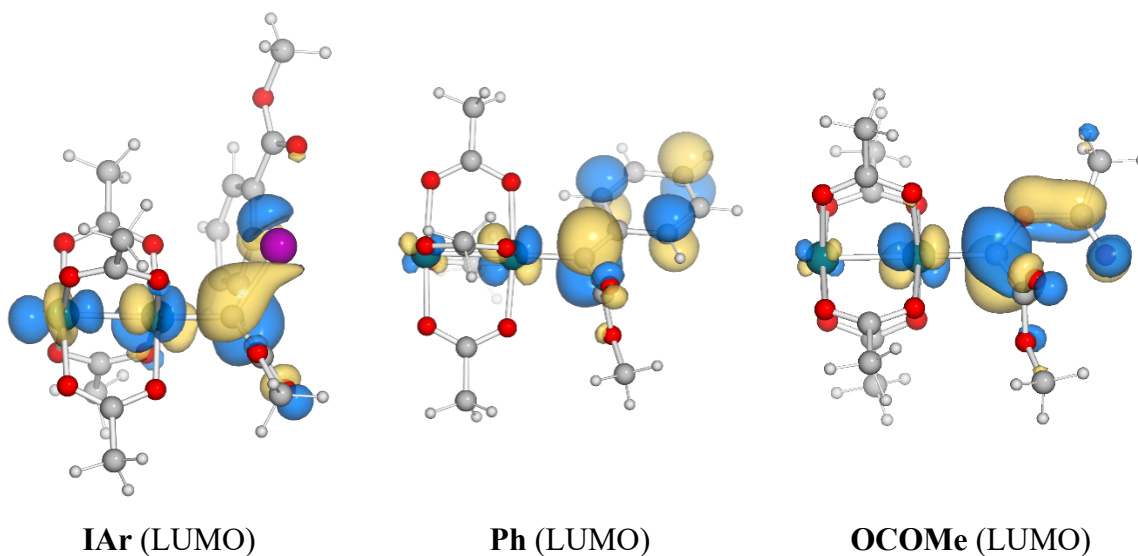

**Figure S7.** LUMO of complexes for different substituent. For Rh-carbynoid, LUMO constitute mainly of carbene carbon *p*-orbital. For the metal-carbene with  $\pi$ -donor substituent ( $-\text{Ph}$  and  $-\text{OCOMe}$ ), it is also distributed on substituent's pi-orbitals.

For X = IAr metal-Carbene complex has lowest  $\epsilon_{\text{LUMO}}$ .

**Table S6.** Bond order (Wiberg bond index (WBI) for selected bonds in complex.

| X             | Wiberg bond index                |                                 |                                |                   |
|---------------|----------------------------------|---------------------------------|--------------------------------|-------------------|
|               | Rh <sub>1</sub> -Rh <sub>2</sub> | Rh <sub>1</sub> -C <sub>1</sub> | C <sub>1</sub> -C <sub>2</sub> | C <sub>1</sub> -X |
| <b>-IAr</b>   | 0.66                             | 1.02                            | 1.00                           | 0.96              |
| <b>-Ph</b>    | 0.63                             | 0.81                            | 1.01                           | <b>1.29</b>       |
| <b>-OCOMe</b> | 0.64                             | 0.84                            | 0.96                           | <b>1.24</b>       |

The bond order (WBI) between carbene carbon and atom of X-substituent is  $>1$  for Ph and OCOMe substituents. It is due to electron donation ( $\pi$ -donation) from Ph and OCOMe substituents to C<sub>1</sub>.

**Table S7.** Computed total electronic energies ( $E_{\text{SPC}}$ ), total electronic energy ( $E$ ) at lower level of theory, zero-point energy correction ( $ZPE$ ), enthalpy ( $H$ ), temperature\*entropy ( $T.S$ ) term,  $T.S$  with quasiharmonic correction by Grimme ( $T.qh-S$ ), free energy (with quasiharmonic corrections for entropy and correction for solution phase standard state of 1 mole/litre,  $qh-G_{\text{SPC}}$ ) and relative energy w.r.t. substrates and catalyst ( $\Delta G_{\text{SPC}}(qh)$ ). The  $E_{\text{SPC}}$  is at PCM<sub>CH<sub>2</sub>Cl<sub>2</sub></sub>/B3LYP-D3BJ/cc-PVTZ-PP(Rh,I),cc-PVTZ(H,C,O,F,P) level of theory. The  $E$  and energy corrections are at PCM<sub>CH<sub>2</sub>Cl<sub>2</sub></sub>/B3LYP-D3BJ/SDD(Rh,I),6-31G\*(H,C,O,F,P) level of theory.

|                                   | $E_{\text{SPC}}$ | $E$          | $ZPE$    | $H$          | $T.S$    | $T.qh-S$ | $qh-G_{\text{SPC}}$ | $\Delta G_{\text{SPC}}(qh)$ |
|-----------------------------------|------------------|--------------|----------|--------------|----------|----------|---------------------|-----------------------------|
| <b>A</b>                          | -2066.985979     | -2066.961239 | 0.678074 | -2066.266252 | 0.107008 | 0.102339 | -2066.368591        | 0.0                         |
| <b>2b<sub>A</sub></b>             | -1170.820538     | -886.079766  | 0.229642 | -1170.569974 | 0.070055 | 0.065753 | -1170.635727        |                             |
| <b>2b*</b>                        | -2111.899123     | -1826.832843 | 0.249817 | -2111.620212 | 0.090304 | 0.082464 | -2111.702676        |                             |
| <b>I<sub>Ar</sub></b>             | -755.52921       | -470.962475  | 0.133339 | -755.384486  | 0.046861 | 0.04584  | -755.430326         |                             |
| <b>HPF<sub>6</sub></b>            | -941.443347      | -941.111235  | 0.027854 | -941.406438  | 0.038711 | 0.038632 | -941.445071         |                             |
| <b>PF<sub>5</sub></b>             | -840.95377       | -840.675917  | 0.016419 | -840.930864  | 0.033236 | 0.033225 | -840.964089         |                             |
| <b>HF</b>                         | -100.488223      | -100.423111  | 0.008936 | -100.475982  | 0.016723 | 0.016723 | -100.492705         |                             |
| <b>PF<sub>6</sub><sup>-</sup></b> | -941.053874      | -940.721133  | 0.018644 | -941.02795   | 0.031678 | 0.03169  | -941.05964          |                             |
| <b>N<sub>2</sub></b>              | -109.569019      | -109.521835  | 0.005603 | -109.560112  | 0.018735 | 0.018735 | -109.578846         |                             |
| <b>1a</b>                         | -577.107995      | -576.878142  | 0.205915 | -576.888936  | 0.050848 | 0.048196 | -576.937132         |                             |
| <b>3a</b>                         | -882.516159      | -882.182064  | 0.285866 | -882.212366  | 0.061914 | 0.058372 | -882.270738         | -60.8                       |
| <b>B</b>                          | -4178.91514      | -3893.84611  | 0.929401 | -4177.914594 | 0.172781 | 0.159362 | -4178.073956        | -1.7                        |
| <b>TS1</b>                        | -4178.897718     | -3893.828126 | 0.926337 | -4177.899821 | 0.174617 | 0.160472 | -4178.060292        | 6.9                         |
| <b>C<sub>N2</sub></b>             | -4178.923178     | -3893.848223 | 0.925701 | -4177.924094 | 0.182543 | 0.165343 | -4178.089438        | -11.4                       |
| <b>C<sub>A</sub></b>              | -3128.272717     | -2843.561664 | 0.899686 | -3127.312105 | 0.149458 | 0.139638 | -3127.451743        | -11.9                       |
| <b>C</b>                          | -4069.353368     | -3784.32631  | 0.920555 | -4068.364084 | 0.165874 | 0.154196 | -4068.51828         | -16.2                       |
| <b>C<sub>1</sub></b>              | -4646.483873     | -4361.23774  | 1.128261 | -4645.273069 | 0.198209 | 0.181099 | -4645.454167        | -15.4                       |
| <b>TS2</b>                        | -4646.478248     | -4361.236496 | 1.128037 | -4645.268584 | 0.19435  | 0.178664 | -4645.447249        | -11.1                       |
| <b>D</b>                          | -4646.492789     | -4361.257137 | 1.129595 | -4645.281666 | 0.193777 | 0.178239 | -4645.459905        | -19.0                       |
| <b>C<sub>c1</sub></b>             | -4646.484584     | -4361.236668 | 1.12781  | -4645.274096 | 0.201364 | 0.182374 | -4645.45647         | -16.9                       |
| <b>C<sub>2</sub></b>              | -4646.479122     | -4361.231697 | 1.128589 | -4645.267924 | 0.198544 | 0.181073 | -4645.448997        | -12.2                       |
| <b>D<sub>3</sub></b>              | -2949.870117     | -2949.515134 | 0.973858 | -2948.834703 | 0.150306 | 0.140188 | -2948.974892        | -22.2                       |
| <b>C<sub>1A</sub></b>             | -3705.408162     | -3420.476486 | 1.108414 | -3704.225599 | 0.178613 | 0.164981 | -3704.39058         | -13.0                       |
| <b>TS2<sub>A</sub></b>            | -3705.40331      | -3420.473732 | 1.1081   | -3704.221735 | 0.177879 | 0.163927 | -3704.385662        | -9.9                        |
| <b>D<sub>1</sub></b>              | -3705.418278     | -3420.496708 | 1.10827  | -3704.236493 | 0.176704 | 0.16337  | -3704.399863        | -18.8                       |
| <b>C<sub>2A</sub></b>             | -3705.403443     | -3420.469105 | 1.107684 | -3704.220963 | 0.182467 | 0.166845 | -3704.387809        | -11.2                       |
| <b>TS4<sub>A</sub></b>            | -3705.400509     | -3420.468202 | 1.1074   | -3704.219165 | 0.179329 | 0.164761 | -3704.383925        | -8.8                        |
| <b>D<sub>2</sub></b>              | -3705.436957     | -3420.511334 | 1.108333 | -3704.25533  | 0.177104 | 0.163378 | -3704.418708        | -30.6                       |
| <b>F</b>                          | -1638.451569     | -1353.539851 | 0.431584 | -1637.988987 | 0.092755 | 0.085474 | -1638.074461        | -45.9                       |
| <b>TS3<sub>PRC</sub></b>          | -2949.467799     | -2949.115524 | 0.961342 | -2948.444789 | 0.150891 | 0.140566 | -2948.585355        | -26.9                       |
| <b>TS3</b>                        | -2949.464313     | -2949.113982 | 0.961568 | -2948.442051 | 0.149127 | 0.138924 | -2948.580975        | -24.2                       |
| <b>TS3<sub>Prod</sub></b>         | -2949.523312     | -2949.174606 | 0.965874 | -2948.497189 | 0.148421 | 0.137988 | -2948.635177        | -58.2                       |

• **Cartesian Coordinates**

|   |      | A       |        |         |
|---|------|---------|--------|---------|
|   | Atom | X       | Y      | Z       |
| 1 | Rh   | -0.0405 | 0.0000 | -1.1945 |
| 2 | O    | 1.3924  | 1.4825 | -1.1621 |

|    |    |         |         |         |
|----|----|---------|---------|---------|
| 3  | O  | 1.3921  | -1.4830 | -1.1624 |
| 4  | O  | 1.4838  | 1.4584  | 1.0954  |
| 5  | O  | 1.4831  | -1.4589 | 1.0951  |
| 6  | C  | 1.8482  | 1.8935  | -0.0440 |
| 7  | C  | 2.9014  | 3.0032  | -0.0940 |
| 8  | C  | 2.2549  | 4.2326  | -0.7666 |
| 9  | H  | 1.9077  | 3.9922  | -1.7752 |
| 10 | H  | 2.9876  | 5.0441  | -0.8324 |
| 11 | H  | 1.4006  | 4.5928  | -0.1819 |
| 12 | C  | 3.3773  | 3.3723  | 1.3165  |
| 13 | H  | 2.5459  | 3.7371  | 1.9265  |
| 14 | H  | 4.1293  | 4.1662  | 1.2492  |
| 15 | H  | 3.8237  | 2.5160  | 1.8271  |
| 16 | C  | 4.0946  | 2.5181  | -0.9762 |
| 17 | H  | 3.7335  | 2.4043  | -2.0029 |
| 18 | H  | 4.8382  | 3.3234  | -0.9786 |
| 19 | C  | 4.7254  | 1.2244  | -0.5143 |
| 20 | C  | 5.7927  | 1.2109  | 0.3931  |
| 21 | H  | 6.2127  | 2.1501  | 0.7431  |
| 22 | C  | 6.3260  | 0.0001  | 0.8380  |
| 23 | H  | 7.1623  | 0.0001  | 1.5315  |
| 24 | C  | 5.7927  | -1.2107 | 0.3931  |
| 25 | H  | 6.2126  | -2.1499 | 0.7432  |
| 26 | C  | 4.7255  | -1.2242 | -0.5143 |
| 27 | C  | 4.2209  | 0.0001  | -0.9689 |
| 28 | H  | 3.4066  | 0.0001  | -1.6849 |
| 29 | C  | 4.0947  | -2.5179 | -0.9763 |
| 30 | H  | 4.8382  | -3.3233 | -0.9787 |
| 31 | H  | 3.7335  | -2.4041 | -2.0030 |
| 32 | C  | 2.9015  | -3.0031 | -0.0939 |
| 33 | C  | 3.3776  | -3.3716 | 1.3167  |
| 34 | H  | 3.8239  | -2.5150 | 1.8269  |
| 35 | H  | 4.1299  | -4.1653 | 1.2496  |
| 36 | H  | 2.5464  | -3.7364 | 1.9268  |
| 37 | C  | 2.2555  | -4.2329 | -0.7662 |
| 38 | H  | 1.4013  | -4.5932 | -0.1814 |
| 39 | H  | 2.9885  | -5.0442 | -0.8317 |
| 40 | H  | 1.9083  | -3.9930 | -1.7749 |
| 41 | C  | 1.8479  | -1.8938 | -0.0442 |
| 42 | Rh | 0.0405  | -0.0000 | 1.1945  |
| 43 | O  | -1.3925 | -1.4825 | 1.1621  |
| 44 | O  | -1.3921 | 1.4830  | 1.1624  |
| 45 | O  | -1.4838 | -1.4584 | -1.0954 |
| 46 | O  | -1.4831 | 1.4589  | -1.0951 |
| 47 | C  | -1.8482 | -1.8935 | 0.0440  |
| 48 | C  | -2.9014 | -3.0032 | 0.0940  |
| 49 | C  | -2.2549 | -4.2326 | 0.7667  |
| 50 | H  | -1.9077 | -3.9922 | 1.7752  |
| 51 | H  | -2.9876 | -5.0441 | 0.8324  |
| 52 | H  | -1.4006 | -4.5928 | 0.1819  |
| 53 | C  | -3.3773 | -3.3723 | -1.3165 |
| 54 | H  | -2.5459 | -3.7371 | -1.9265 |
| 55 | H  | -4.1293 | -4.1662 | -1.2492 |



|    |   |         |         |         |
|----|---|---------|---------|---------|
| 56 | H | -3.8237 | -2.5160 | -1.8271 |
| 57 | C | -4.0946 | -2.5181 | 0.9762  |
| 58 | H | -3.7335 | -2.4043 | 2.0029  |
| 59 | H | -4.8382 | -3.3234 | 0.9786  |
| 60 | C | -4.7254 | -1.2244 | 0.5143  |
| 61 | C | -5.7927 | -1.2109 | -0.3931 |
| 62 | H | -6.2127 | -2.1501 | -0.7431 |
| 63 | C | -6.3260 | -0.0001 | -0.8380 |
| 64 | H | -7.1623 | -0.0001 | -1.5315 |
| 65 | C | -5.7927 | 1.2107  | -0.3931 |
| 66 | H | -6.2126 | 2.1499  | -0.7432 |
| 67 | C | -4.7255 | 1.2242  | 0.5143  |
| 68 | C | -4.2209 | -0.0001 | 0.9689  |
| 69 | H | -3.4066 | -0.0001 | 1.6849  |
| 70 | C | -4.0947 | 2.5179  | 0.9763  |
| 71 | H | -4.8382 | 3.3233  | 0.9787  |
| 72 | H | -3.7335 | 2.4041  | 2.0030  |
| 73 | C | -2.9015 | 3.0031  | 0.0939  |
| 74 | C | -3.3776 | 3.3716  | -1.3167 |
| 75 | H | -3.8239 | 2.5150  | -1.8269 |
| 76 | H | -4.1299 | 4.1653  | -1.2496 |
| 77 | H | -2.5464 | 3.7364  | -1.9268 |
| 78 | C | -2.2555 | 4.2329  | 0.7662  |
| 79 | H | -1.4013 | 4.5932  | 0.1815  |
| 80 | H | -2.9885 | 5.0442  | 0.8317  |
| 81 | H | -1.9083 | 3.9930  | 1.7749  |
| 82 | C | -1.8479 | 1.8938  | 0.0442  |

|    |      | <b>2b*</b> |         |         |
|----|------|------------|---------|---------|
|    | Atom | X          | Y       | Z       |
| 1  | I    | 0.6410     | -0.3072 | 0.1219  |
| 2  | O    | 2.7022     | -1.8252 | -0.3197 |
| 3  | O    | 4.9351     | -1.5950 | -0.4703 |
| 4  | O    | -0.8018    | 1.9460  | -1.7814 |
| 5  | O    | -2.2895    | 2.7556  | -0.2614 |
| 6  | C    | 2.4208     | 0.9402  | 0.2191  |
| 7  | C    | 2.2897     | 2.2901  | 0.4793  |
| 8  | H    | 1.3172     | 2.7385  | 0.6445  |
| 9  | C    | 3.4522     | 3.0681  | 0.5258  |
| 10 | H    | 3.3670     | 4.1305  | 0.7296  |
| 11 | C    | 4.7040     | 2.4893  | 0.3126  |
| 12 | H    | 5.5992     | 3.1002  | 0.3500  |
| 13 | C    | 4.8073     | 1.1264  | 0.0502  |
| 14 | H    | 5.7721     | 0.6632  | -0.1176 |
| 15 | C    | 3.6557     | 0.3267  | -0.0011 |
| 16 | C    | 3.7170     | -1.1244 | -0.2771 |
| 17 | C    | 5.0475     | -3.0129 | -0.7476 |
| 18 | H    | 4.4957     | -3.2560 | -1.6571 |
| 19 | H    | 4.6543     | -3.5860 | 0.0937  |
| 20 | C    | -0.6785    | 1.2764  | 0.4830  |
| 21 | C    | -1.2514    | 2.0118  | -0.6554 |
| 22 | C    | -2.9473    | 3.5387  | -1.2978 |
| 23 | H    | -3.2867    | 2.8524  | -2.0776 |
| 24 | H    | -2.2106    | 4.2203  | -1.7317 |
| 25 | N    | -1.2140    | 1.3553  | 1.6735  |
| 26 | N    | -1.6665    | 1.4408  | 2.7073  |
| 27 | F    | -2.0930    | -1.2474 | 1.3143  |
| 28 | F    | -2.3807    | -0.7010 | -0.9141 |
| 29 | P    | -2.7662    | -2.0071 | 0.0107  |
| 30 | F    | -4.2030    | -1.3357 | 0.3632  |
| 31 | F    | -3.3912    | -2.7486 | -1.2921 |
| 32 | F    | -3.1036    | -3.2946 | 0.9429  |
| 33 | F    | -1.2818    | -2.6414 | -0.3317 |
| 34 | H    | 6.1129     | -3.1907 | -0.8775 |
| 35 | C    | -4.0948    | 4.2736  | -0.6384 |
| 36 | H    | -4.6189    | 4.8748  | -1.3882 |
| 37 | H    | -4.8077    | 3.5687  | -0.2000 |
| 38 | H    | -3.7314    | 4.9418  | 0.1485  |

|    |      | <b>1a</b> |         |         |
|----|------|-----------|---------|---------|
|    | Atom | X         | Y       | Z       |
| 1  | C    | -1.8764   | -1.3845 | 0.1174  |
| 2  | O    | -1.6817   | -1.6132 | 1.2943  |
| 3  | O    | -2.2161   | -2.3479 | -0.7657 |
| 4  | H    | -2.2754   | -3.1852 | -0.2654 |
| 5  | C    | -1.8072   | -0.0207 | -0.5325 |
| 6  | H    | -1.5842   | -0.1353 | -1.5967 |
| 7  | H    | -2.8093   | 0.4229  | -0.4664 |
| 8  | C    | -0.7901   | 0.9028  | 0.1699  |
| 9  | C    | -0.8704   | 2.3016  | -0.3952 |
| 10 | C    | -1.2399   | 3.3746  | 0.3040  |
| 11 | H    | -1.2821   | 4.3630  | -0.1458 |
| 12 | H    | -1.5124   | 3.3032  | 1.3551  |
| 13 | H    | -0.5996   | 2.4093  | -1.4458 |
| 14 | C    | 0.6253    | 0.3488  | 0.0672  |
| 15 | C    | 1.3508    | 0.0472  | 1.2251  |
| 16 | C    | 2.6505    | -0.4562 | 1.1451  |
| 17 | C    | 3.2452    | -0.6654 | -0.1005 |
| 18 | C    | 2.5302    | -0.3686 | -1.2634 |
| 19 | C    | 1.2312    | 0.1339  | -1.1786 |
| 20 | H    | 0.6885    | 0.3598  | -2.0929 |
| 21 | H    | 2.9835    | -0.5285 | -2.2377 |
| 22 | H    | 4.2561    | -1.0577 | -0.1656 |
| 23 | H    | 3.1963    | -0.6869 | 2.0558  |
| 24 | H    | 0.8884    | 0.2018  | 2.1961  |
| 25 | H    | -1.0637   | 0.9405  | 1.2289  |

|    |      | <b>3a</b> |         |         |
|----|------|-----------|---------|---------|
|    | Atom | X         | Y       | Z       |
| 1  | O    | 1.4789    | 1.4917  | 0.5984  |
| 2  | C    | 0.7663    | 2.0333  | -0.4352 |
| 3  | O    | 1.1547    | 3.0726  | -0.9147 |
| 4  | C    | -0.4980   | 1.3097  | -0.8451 |
| 5  | H    | -1.1227   | 2.0238  | -1.3851 |
| 6  | H    | -0.2332   | 0.5058  | -1.5432 |
| 7  | C    | -1.2271   | 0.7085  | 0.3792  |
| 8  | C    | -2.5415   | 0.0602  | -0.0072 |
| 9  | C    | -2.5761   | -1.0477 | -0.8656 |
| 10 | C    | -3.7906   | -1.6305 | -1.2267 |
| 11 | C    | -4.9916   | -1.1121 | -0.7353 |
| 12 | C    | -4.9679   | -0.0086 | 0.1186  |
| 13 | C    | -3.7496   | 0.5718  | 0.4784  |
| 14 | H    | -3.7357   | 1.4307  | 1.1445  |
| 15 | H    | -5.8958   | 0.4015  | 0.5069  |
| 16 | H    | -5.9375   | -1.5662 | -1.0161 |
| 17 | H    | -3.7991   | -2.4893 | -1.8918 |
| 18 | H    | -1.6501   | -1.4617 | -1.2565 |
| 19 | C    | -0.2590   | -0.2663 | 1.0439  |
| 20 | C    | 0.4367    | 0.0427  | 2.3337  |
| 21 | H    | 0.7179    | -0.7830 | 2.9783  |
| 22 | H    | 0.1991    | 0.9789  | 2.8305  |
| 23 | C    | 1.1939    | 0.1782  | 1.0352  |
| 24 | C    | 2.2189    | -0.8488 | 0.6825  |
| 25 | O    | 2.1798    | -1.9891 | 1.1101  |
| 26 | O    | 3.1370    | -0.3825 | -0.1683 |
| 27 | C    | 4.1529    | -1.3297 | -0.5922 |
| 28 | C    | 5.0731    | -0.6018 | -1.5500 |
| 29 | H    | 5.8571    | -1.2843 | -1.8939 |
| 30 | H    | 4.5209    | -0.2408 | -2.4234 |
| 31 | H    | 5.5488    | 0.2534  | -1.0600 |
| 32 | H    | 4.6801    | -1.6906 | 0.2954  |
| 33 | H    | 3.6554    | -2.1827 | -1.0626 |
| 34 | H    | -0.4051   | -1.3169 | 0.8132  |
| 35 | H    | -1.4457   | 1.5269  | 1.0736  |

|   |      | <b>PF<sub>6</sub><sup>-</sup></b> |         |         |
|---|------|-----------------------------------|---------|---------|
|   | Atom | X                                 | Y       | Z       |
| 1 | P    | 0.0000                            | 0.0000  | 0.0000  |
| 2 | F    | -0.0000                           | -0.0000 | 1.6362  |
| 3 | F    | -0.0000                           | 1.6362  | -0.0000 |
| 4 | F    | -1.6362                           | -0.0000 | -0.0000 |
| 5 | F    | -0.0000                           | -0.0000 | -1.6362 |
| 6 | F    | -0.0000                           | -1.6362 | 0.0000  |
| 7 | F    | 1.6362                            | -0.0000 | 0.0000  |

|   |      | <b>HPF<sub>6</sub></b> |         |         |
|---|------|------------------------|---------|---------|
|   | Atom | X                      | Y       | Z       |
| 1 | P    | 0.2674                 | -0.0028 | -0.0000 |
| 2 | F    | 0.0239                 | 0.0094  | 1.5756  |
| 3 | F    | -0.1807                | -1.5417 | -0.0039 |
| 4 | F    | 1.8240                 | -0.1667 | -0.0006 |
| 5 | F    | 0.0236                 | 0.0176  | -1.5755 |
| 6 | F    | 0.1316                 | 1.5824  | 0.0041  |
| 7 | F    | -2.0082                | 0.1819  | 0.0005  |
| 8 | H    | -2.3389                | -0.7048 | -0.0016 |

|   |      | <b>PF<sub>5</sub></b> |         |         |
|---|------|-----------------------|---------|---------|
|   | Atom | X                     | Y       | Z       |
| 1 | P    | 0.0001                | -0.0000 | -0.0003 |
| 2 | F    | -1.6000               | 0.0016  | 0.0001  |
| 3 | F    | 0.0004                | -0.0089 | 1.5682  |
| 4 | F    | 0.0016                | 1.3636  | -0.7760 |
| 5 | F    | 1.6001                | -0.0017 | -0.0006 |
| 6 | F    | -0.0023               | -1.3547 | -0.7913 |

|   |      | <b>HF</b> |        |         |
|---|------|-----------|--------|---------|
|   | Atom | X         | Y      | Z       |
| 1 | F    | 0.0000    | 0.0000 | 0.0937  |
| 2 | H    | 0.0000    | 0.0000 | -0.8436 |

|   |      | <b>N<sub>2</sub></b> |         |         |
|---|------|----------------------|---------|---------|
|   | Atom | X                    | Y       | Z       |
| 1 | N    | -0.0000              | -0.0000 | 0.5525  |
| 2 | N    | 0.0000               | -0.0000 | -0.5525 |

|    |      | <b>IAr</b> |         |         |
|----|------|------------|---------|---------|
|    | Atom | X          | Y       | Z       |
| 1  | I    | 1.8354     | -0.6788 | -0.0612 |
| 2  | O    | -1.1084    | -1.7229 | 0.7619  |
| 3  | O    | -2.8426    | -0.8488 | -0.3850 |
| 4  | C    | 0.3246     | 0.8600  | 0.0373  |
| 5  | C    | 0.7988     | 2.1704  | -0.0159 |
| 6  | H    | 1.8641     | 2.3621  | -0.0671 |
| 7  | C    | -0.1007    | 3.2375  | -0.0068 |
| 8  | H    | 0.2792     | 4.2540  | -0.0396 |
| 9  | C    | -1.4733    | 2.9950  | 0.0369  |
| 10 | H    | -2.1784    | 3.8198  | 0.0401  |
| 11 | C    | -1.9381    | 1.6849  | 0.0736  |
| 12 | H    | -3.0022    | 1.4839  | 0.1064  |
| 13 | C    | -1.0519    | 0.5924  | 0.0850  |
| 14 | C    | -1.6301    | -0.7814 | 0.1987  |
| 15 | C    | -3.5200    | -2.1128 | -0.2595 |
| 16 | H    | -2.9342    | -2.9050 | -0.7311 |
| 17 | H    | -4.4727    | -1.9827 | -0.7713 |
| 18 | H    | -3.6777    | -2.3567 | 0.7938  |

**B**

|    | Atom | X       | Y       | Z       |
|----|------|---------|---------|---------|
| 1  | C    | 4.5518  | 3.8940  | 2.5546  |
| 2  | C    | 3.9069  | 4.3409  | 1.4052  |
| 3  | C    | 3.2064  | 3.4547  | 0.5708  |
| 4  | C    | 3.1771  | 2.1108  | 0.9548  |
| 5  | C    | 3.7865  | 1.6440  | 2.1115  |
| 6  | C    | 4.4910  | 2.5477  | 2.9096  |
| 7  | I    | 2.1966  | 0.5329  | -0.1579 |
| 8  | C    | 0.1901  | 1.3816  | -0.3497 |
| 9  | Rh   | -1.2031 | -0.3115 | 0.0011  |
| 10 | O    | -2.5608 | 0.7117  | 1.1509  |
| 11 | C    | -3.5261 | 0.0778  | 1.6895  |
| 12 | O    | -3.7768 | -1.1592 | 1.5239  |
| 13 | Rh   | -2.5138 | -2.3025 | 0.3605  |
| 14 | O    | -1.3987 | -2.6418 | 2.0673  |
| 15 | C    | -0.5030 | -1.8003 | 2.3954  |
| 16 | O    | -0.1888 | -0.7650 | 1.7228  |
| 17 | C    | 2.5182  | 3.9743  | -0.6427 |
| 18 | O    | 2.3912  | 5.3022  | -0.6268 |
| 19 | C    | 1.6946  | 5.8771  | -1.7540 |
| 20 | C    | -0.1500 | 2.4872  | 0.6102  |
| 21 | O    | 0.2776  | 2.5391  | 1.7416  |
| 22 | O    | -0.9906 | 3.3426  | 0.0335  |
| 23 | C    | -1.4888 | 4.4394  | 0.8589  |
| 24 | O    | 0.0976  | -1.4194 | -1.1299 |
| 25 | C    | -0.1524 | -2.6579 | -1.3401 |
| 26 | O    | -1.1325 | -3.2876 | -0.8392 |
| 27 | C    | 0.8060  | -3.4242 | -2.2507 |
| 28 | C    | 1.7950  | -2.4747 | -2.9382 |
| 29 | C    | 1.5659  | -4.4680 | -1.3705 |
| 30 | C    | 2.1826  | -3.9075 | -0.1086 |
| 31 | C    | 3.4726  | -3.3626 | -0.0866 |
| 32 | C    | 4.0093  | -2.8726 | 1.1057  |
| 33 | C    | 3.2548  | -2.8884 | 2.2784  |
| 34 | C    | 1.9510  | -3.4021 | 2.2767  |
| 35 | C    | 1.4425  | -3.9217 | 1.0812  |
| 36 | C    | 1.0829  | -3.3754 | 3.5129  |
| 37 | C    | 0.2691  | -2.0538 | 3.6919  |
| 38 | C    | 1.2012  | -0.8761 | 4.0056  |
| 39 | C    | -0.0218 | -4.1724 | -3.3137 |
| 40 | O    | -2.3024 | 0.0267  | -1.6972 |
| 41 | C    | -3.2194 | -0.7956 | -2.0296 |
| 42 | O    | -3.5446 | -1.8303 | -1.3665 |
| 43 | C    | -3.9925 | -0.5126 | -3.3196 |
| 44 | C    | -3.4081 | 0.6991  | -4.0570 |
| 45 | C    | -5.4877 | -0.2650 | -2.9399 |
| 46 | C    | -5.6970 | 0.7850  | -1.8732 |
| 47 | C    | -5.8150 | 2.1454  | -2.1862 |
| 48 | C    | -5.9743 | 3.0913  | -1.1718 |
| 49 | C    | -6.0128 | 2.6923  | 0.1657  |
| 50 | C    | -5.8955 | 1.3379  | 0.5040  |
| 51 | C    | -5.7510 | 0.4030  | -0.5276 |

|     |   |         |         |         |
|-----|---|---------|---------|---------|
| 52  | C | -5.8852 | 0.8721  | 1.9413  |
| 53  | C | -4.4698 | 0.8648  | 2.6026  |
| 54  | C | -3.9589 | 2.2956  | 2.8111  |
| 55  | C | -3.9083 | -1.7613 | -4.2199 |
| 56  | C | -0.7436 | -2.2399 | 4.8381  |
| 57  | C | -4.5556 | 0.1384  | 3.9590  |
| 58  | O | 2.0907  | 3.2721  | -1.5450 |
| 59  | N | -0.0320 | 1.6980  | -1.6570 |
| 60  | N | -0.3109 | 1.8453  | -2.7316 |
| 61  | F | 4.8100  | -0.2201 | 0.1194  |
| 62  | H | -1.8116 | 4.0230  | 1.8139  |
| 63  | H | -0.6532 | 5.1235  | 1.0317  |
| 64  | H | 0.8601  | -5.2606 | -1.1021 |
| 65  | H | 2.3367  | -4.9188 | -2.0058 |
| 66  | H | 4.0717  | -3.3263 | -0.9906 |
| 67  | H | 5.0147  | -2.4716 | 1.1052  |
| 68  | H | 0.4431  | -4.3458 | 1.0749  |
| 69  | H | 0.6459  | -4.7686 | -3.9445 |
| 70  | H | -0.7526 | -4.8384 | -2.8483 |
| 71  | H | -0.5576 | -3.4663 | -3.9587 |
| 72  | H | 2.4183  | -3.0481 | -3.6328 |
| 73  | H | 1.2686  | -1.7032 | -3.5092 |
| 74  | H | 2.4593  | -1.9807 | -2.2293 |
| 75  | H | -6.0096 | 0.0155  | -3.8620 |
| 76  | H | -5.9124 | -1.2148 | -2.6005 |
| 77  | H | -5.7981 | 2.4628  | -3.2251 |
| 78  | H | -6.0806 | 4.1425  | -1.4250 |
| 79  | H | -5.6713 | -0.6498 | -0.2764 |
| 80  | H | -4.3111 | -2.6412 | -3.7119 |
| 81  | H | -4.4820 | -1.5924 | -5.1375 |
| 82  | H | -2.8699 | -1.9696 | -4.5020 |
| 83  | H | -3.9875 | 0.8816  | -4.9687 |
| 84  | H | -3.4365 | 1.6001  | -3.4408 |
| 85  | H | -2.3678 | 0.5177  | -4.3420 |
| 86  | H | 0.3733  | -4.2081 | 3.4790  |
| 87  | H | 1.6929  | -3.5014 | 4.4149  |
| 88  | H | 3.6835  | -2.5123 | 3.2038  |
| 89  | H | -0.2093 | -2.4537 | 5.7701  |
| 90  | H | -1.4277 | -3.0663 | 4.6290  |
| 91  | H | -1.3357 | -1.3296 | 4.9869  |
| 92  | H | 1.7398  | -1.0759 | 4.9384  |
| 93  | H | 0.6352  | 0.0524  | 4.1226  |
| 94  | H | 1.9316  | -0.7230 | 3.2094  |
| 95  | H | -6.5248 | 1.5138  | 2.5581  |
| 96  | H | -6.2902 | -0.1432 | 1.9968  |
| 97  | H | -6.1499 | 3.4333  | 0.9485  |
| 98  | H | -4.9029 | -0.8902 | 3.8331  |
| 99  | H | -5.2540 | 0.6674  | 4.6164  |
| 100 | H | -3.5767 | 0.1154  | 4.4514  |
| 101 | H | -4.6420 | 2.8329  | 3.4779  |
| 102 | H | -3.8982 | 2.8388  | 1.8665  |
| 103 | H | -2.9640 | 2.2910  | 3.2664  |
| 104 | H | 3.7336  | 0.5997  | 2.3909  |



|     |   |         |         |         |
|-----|---|---------|---------|---------|
| 105 | H | 3.9377  | 5.3879  | 1.1310  |
| 106 | H | 4.9810  | 2.1891  | 3.8087  |
| 107 | H | 5.0933  | 4.5994  | 3.1755  |
| 108 | H | 2.2270  | 5.6520  | -2.6799 |
| 109 | H | 0.6799  | 5.4759  | -1.8039 |
| 110 | H | 1.6802  | 6.9486  | -1.5640 |
| 111 | C | -2.6228 | 5.0849  | 0.0933  |
| 112 | H | -3.0256 | 5.9177  | 0.6787  |
| 113 | H | -2.2740 | 5.4750  | -0.8681 |
| 114 | H | -3.4276 | 4.3661  | -0.0898 |
| 115 | P | 5.7651  | -0.1681 | -1.2546 |
| 116 | F | 4.4996  | -0.7653 | -2.1087 |
| 117 | F | 6.2575  | -1.6900 | -0.9348 |
| 118 | F | 6.6742  | -0.1127 | -2.5947 |
| 119 | F | 6.9769  | 0.4292  | -0.3531 |
| 120 | F | 5.2118  | 1.3481  | -1.5278 |

## TS1

|    | Atom | X       | Y       | Z       |
|----|------|---------|---------|---------|
| 1  | C    | 4.2377  | 4.0382  | 2.6137  |
| 2  | C    | 3.5883  | 4.4497  | 1.4531  |
| 3  | C    | 2.9957  | 3.5199  | 0.5839  |
| 4  | C    | 3.0697  | 2.1715  | 0.9464  |
| 5  | C    | 3.6898  | 1.7374  | 2.1103  |
| 6  | C    | 4.2897  | 2.6846  | 2.9429  |
| 7  | I    | 2.1827  | 0.5710  | -0.2007 |
| 8  | C    | 0.0778  | 1.2153  | -0.2071 |
| 9  | Rh   | -1.1518 | -0.3622 | -0.0102 |
| 10 | O    | -2.5215 | 0.7207  | 1.0681  |
| 11 | C    | -3.4886 | 0.1216  | 1.6463  |
| 12 | O    | -3.7524 | -1.1174 | 1.5450  |
| 13 | Rh   | -2.4967 | -2.3319 | 0.4378  |
| 14 | O    | -1.4132 | -2.6265 | 2.1715  |
| 15 | C    | -0.5248 | -1.7724 | 2.4761  |
| 16 | O    | -0.1889 | -0.7750 | 1.7559  |
| 17 | C    | 2.3297  | 3.9986  | -0.6611 |
| 18 | O    | 1.9532  | 5.2788  | -0.5696 |
| 19 | C    | 1.3081  | 5.8234  | -1.7419 |
| 20 | C    | -0.1714 | 2.4421  | 0.6317  |
| 21 | O    | 0.1520  | 2.4497  | 1.8014  |
| 22 | O    | -0.8500 | 3.3796  | -0.0151 |
| 23 | C    | -1.3144 | 4.5264  | 0.7671  |
| 24 | O    | 0.1486  | -1.5312 | -1.0654 |
| 25 | C    | -0.1157 | -2.7762 | -1.2245 |
| 26 | O    | -1.1061 | -3.3727 | -0.7068 |
| 27 | C    | 0.8494  | -3.5847 | -2.0908 |
| 28 | C    | 1.7999  | -2.6611 | -2.8639 |
| 29 | C    | 1.6536  | -4.5352 | -1.1447 |
| 30 | C    | 2.2417  | -3.8704 | 0.0792  |
| 31 | C    | 3.4948  | -3.2451 | 0.0643  |
| 32 | C    | 3.9994  | -2.6532 | 1.2240  |
| 33 | C    | 3.2509  | -2.6549 | 2.4012  |
| 34 | C    | 1.9843  | -3.2535 | 2.4353  |
| 35 | C    | 1.5071  | -3.8666 | 1.2718  |
| 36 | C    | 1.1173  | -3.2248 | 3.6718  |
| 37 | C    | 0.2243  | -1.9480 | 3.7990  |
| 38 | C    | 1.0801  | -0.7108 | 4.1040  |
| 39 | C    | 0.0323  | -4.4376 | -3.0797 |
| 40 | O    | -2.2267 | -0.1118 | -1.7364 |
| 41 | C    | -3.1639 | -0.9319 | -2.0282 |
| 42 | O    | -3.5106 | -1.9187 | -1.3102 |
| 43 | C    | -3.9326 | -0.7064 | -3.3322 |
| 44 | C    | -3.3242 | 0.4387  | -4.1500 |
| 45 | C    | -5.4192 | -0.3959 | -2.9626 |
| 46 | C    | -5.5962 | 0.7163  | -1.9550 |
| 47 | C    | -5.6560 | 2.0629  | -2.3376 |
| 48 | C    | -5.7869 | 3.0649  | -1.3742 |
| 49 | C    | -5.8554 | 2.7366  | -0.0187 |
| 50 | C    | -5.7974 | 1.3973  | 0.3885  |
| 51 | C    | -5.6800 | 0.4062  | -0.5927 |

|     |   |         |         |         |
|-----|---|---------|---------|---------|
| 52  | C | -5.8199 | 1.0026  | 1.8466  |
| 53  | C | -4.4114 | 0.9733  | 2.5223  |
| 54  | C | -3.8532 | 2.3936  | 2.6793  |
| 55  | C | -3.8869 | -2.0120 | -4.1514 |
| 56  | C | -0.8025 | -2.1647 | 4.9263  |
| 57  | C | -4.5316 | 0.3037  | 3.9047  |
| 58  | O | 2.1326  | 3.3090  | -1.6467 |
| 59  | N | -0.0767 | 1.8404  | -1.9088 |
| 60  | N | -0.5159 | 1.7410  | -2.9226 |
| 61  | F | 4.9362  | -0.0142 | 0.0799  |
| 62  | H | -1.6599 | 4.1577  | 1.7334  |
| 63  | H | -0.4515 | 5.1798  | 0.9203  |
| 64  | H | 0.9826  | -5.3394 | -0.8255 |
| 65  | H | 2.4437  | -4.9915 | -1.7517 |
| 66  | H | 4.0911  | -3.2233 | -0.8414 |
| 67  | H | 4.9759  | -2.1871 | 1.1944  |
| 68  | H | 0.5363  | -4.3531 | 1.2940  |
| 69  | H | 0.7106  | -5.0621 | -3.6705 |
| 70  | H | -0.6730 | -5.0860 | -2.5541 |
| 71  | H | -0.5314 | -3.8006 | -3.7708 |
| 72  | H | 2.4348  | -3.2681 | -3.5182 |
| 73  | H | 1.2415  | -1.9563 | -3.4883 |
| 74  | H | 2.4518  | -2.0893 | -2.2040 |
| 75  | H | -5.9352 | -0.1525 | -3.8984 |
| 76  | H | -5.8694 | -1.3130 | -2.5705 |
| 77  | H | -5.6176 | 2.3265  | -3.3908 |
| 78  | H | -5.8483 | 4.1051  | -1.6818 |
| 79  | H | -5.6464 | -0.6350 | -0.2875 |
| 80  | H | -4.3063 | -2.8474 | -3.5852 |
| 81  | H | -4.4649 | -1.8866 | -5.0732 |
| 82  | H | -2.8566 | -2.2632 | -4.4282 |
| 83  | H | -3.9085 | 0.5765  | -5.0663 |
| 84  | H | -3.3233 | 1.3784  | -3.5943 |
| 85  | H | -2.2926 | 0.2121  | -4.4325 |
| 86  | H | 0.4590  | -4.0995 | 3.6741  |
| 87  | H | 1.7326  | -3.2759 | 4.5776  |
| 88  | H | 3.6573  | -2.2041 | 3.3030  |
| 89  | H | -0.2777 | -2.3340 | 5.8726  |
| 90  | H | -1.4392 | -3.0285 | 4.7196  |
| 91  | H | -1.4429 | -1.2833 | 5.0457  |
| 92  | H | 1.5989  | -0.8548 | 5.0579  |
| 93  | H | 0.4597  | 0.1871  | 4.1775  |
| 94  | H | 1.8247  | -0.5370 | 3.3257  |
| 95  | H | -6.4397 | 1.6972  | 2.4251  |
| 96  | H | -6.2643 | 0.0073  | 1.9461  |
| 97  | H | -5.9713 | 3.5214  | 0.7238  |
| 98  | H | -4.9107 | -0.7174 | 3.8164  |
| 99  | H | -5.2180 | 0.8803  | 4.5340  |
| 100 | H | -3.5580 | 0.2695  | 4.4070  |
| 101 | H | -4.5216 | 2.9783  | 3.3206  |
| 102 | H | -3.7689 | 2.8977  | 1.7150  |
| 103 | H | -2.8612 | 2.3732  | 3.1404  |
| 104 | H | 3.7169  | 0.6866  | 2.3699  |

|     |   |         |         |         |
|-----|---|---------|---------|---------|
| 105 | H | 3.5381  | 5.5003  | 1.1948  |
| 106 | H | 4.7865  | 2.3544  | 3.8491  |
| 107 | H | 4.6973  | 4.7761  | 3.2623  |
| 108 | H | 1.9848  | 5.7807  | -2.5973 |
| 109 | H | 0.4010  | 5.2564  | -1.9603 |
| 110 | H | 1.0704  | 6.8538  | -1.4841 |
| 111 | C | -2.4172 | 5.1858  | -0.0320 |
| 112 | H | -2.7903 | 6.0550  | 0.5191  |
| 113 | H | -2.0509 | 5.5262  | -1.0055 |
| 114 | H | -3.2480 | 4.4917  | -0.1931 |
| 115 | P | 5.7695  | -0.1580 | -1.3562 |
| 116 | F | 4.4278  | -0.8264 | -2.0282 |
| 117 | F | 6.2650  | -1.6431 | -0.8935 |
| 118 | F | 6.5618  | -0.2953 | -2.7649 |
| 119 | F | 7.0673  | 0.5135  | -0.6459 |
| 120 | F | 5.2183  | 1.3238  | -1.7773 |

|    |      | C <sub>N2</sub> |         |         |
|----|------|-----------------|---------|---------|
|    | Atom | X               | Y       | Z       |
| 1  | C    | 3.9711          | 4.1603  | 2.7998  |
| 2  | C    | 3.3440          | 4.5385  | 1.6152  |
| 3  | C    | 2.8422          | 3.5791  | 0.7221  |
| 4  | C    | 2.9834          | 2.2368  | 1.0886  |
| 5  | C    | 3.5872          | 1.8317  | 2.2699  |
| 6  | C    | 4.0944          | 2.8112  | 3.1276  |
| 7  | I    | 2.1652          | 0.6277  | -0.0988 |
| 8  | C    | 0.1045          | 1.1021  | 0.1744  |
| 9  | Rh   | -1.1089         | -0.3704 | 0.0093  |
| 10 | O    | -2.4637         | 0.5745  | 1.2195  |
| 11 | C    | -3.4373         | -0.0842 | 1.7196  |
| 12 | O    | -3.7143         | -1.2954 | 1.4581  |
| 13 | Rh   | -2.4867         | -2.3645 | 0.1780  |
| 14 | O    | -1.4324         | -2.9567 | 1.8423  |
| 15 | C    | -0.5237         | -2.1813 | 2.2646  |
| 16 | O    | -0.1671         | -1.0958 | 1.6938  |
| 17 | C    | 2.2124          | 4.0182  | -0.5590 |
| 18 | O    | 1.7559          | 5.2743  | -0.4876 |
| 19 | C    | 1.1479          | 5.7806  | -1.6965 |
| 20 | C    | -0.1728         | 2.3075  | 1.0136  |
| 21 | O    | 0.0110          | 2.2962  | 2.2146  |
| 22 | O    | -0.7063         | 3.2728  | 0.2827  |
| 23 | C    | -1.2246         | 4.4534  | 0.9822  |
| 24 | O    | 0.1833          | -1.3932 | -1.1888 |
| 25 | C    | -0.1070         | -2.5949 | -1.5361 |
| 26 | O    | -1.1131         | -3.2400 | -1.1174 |
| 27 | C    | 0.8450          | -3.2774 | -2.5167 |
| 28 | C    | 1.8310          | -2.2672 | -3.1195 |
| 29 | C    | 1.6063          | -4.3969 | -1.7345 |
| 30 | C    | 2.2065          | -3.9510 | -0.4210 |
| 31 | C    | 3.4703          | -3.3526 | -0.3414 |
| 32 | C    | 3.9814          | -2.9463 | 0.8924  |
| 33 | C    | 3.2303          | -3.1135 | 2.0558  |
| 34 | C    | 1.9550          | -3.6911 | 2.0004  |
| 35 | C    | 1.4694          | -4.1153 | 0.7585  |
| 36 | C    | 1.0854          | -3.8267 | 3.2278  |
| 37 | C    | 0.2245          | -2.5604 | 3.5436  |
| 38 | C    | 1.1093          | -1.4003 | 4.0210  |
| 39 | C    | 0.0118          | -3.9259 | -3.6391 |
| 40 | O    | -2.2060         | 0.1195  | -1.6540 |
| 41 | C    | -3.1582         | -0.6366 | -2.0482 |
| 42 | O    | -3.5121         | -1.7125 | -1.4751 |
| 43 | C    | -3.9313         | -0.2177 | -3.3004 |
| 44 | C    | -3.3261         | 1.0395  | -3.9354 |
| 45 | C    | -5.4178         | 0.0268  | -2.8867 |
| 46 | C    | -5.5956         | 0.9916  | -1.7378 |
| 47 | C    | -5.6735         | 2.3760  | -1.9377 |
| 48 | C    | -5.8018         | 3.2394  | -0.8483 |
| 49 | C    | -5.8471         | 2.7332  | 0.4522  |
| 50 | C    | -5.7696         | 1.3528  | 0.6773  |
| 51 | C    | -5.6580         | 0.5019  | -0.4283 |

|     |   |         |         |         |
|-----|---|---------|---------|---------|
| 52  | C | -5.7610 | 0.7699  | 2.0710  |
| 53  | C | -4.3380 | 0.6624  | 2.7065  |
| 54  | C | -3.7708 | 2.0549  | 3.0149  |
| 55  | C | -3.8803 | -1.3858 | -4.3065 |
| 56  | C | -0.8095 | -2.9122 | 4.6301  |
| 57  | C | -4.4273 | -0.1663 | 4.0030  |
| 58  | O | 2.1177  | 3.3207  | -1.5514 |
| 59  | N | -0.2500 | 2.2993  | -3.0555 |
| 60  | N | 0.3107  | 1.3628  | -3.2230 |
| 61  | F | 4.9341  | -0.0714 | 0.3873  |
| 62  | H | -1.5837 | 4.1348  | 1.9614  |
| 63  | H | -0.3821 | 5.1371  | 1.1094  |
| 64  | H | 0.9050  | -5.2168 | -1.5486 |
| 65  | H | 2.3844  | -4.7783 | -2.4053 |
| 66  | H | 4.0673  | -3.2056 | -1.2350 |
| 67  | H | 4.9631  | -2.4923 | 0.9329  |
| 68  | H | 0.4904  | -4.5835 | 0.7075  |
| 69  | H | 0.6780  | -4.4608 | -4.3239 |
| 70  | H | -0.7163 | -4.6330 | -3.2341 |
| 71  | H | -0.5267 | -3.1643 | -4.2147 |
| 72  | H | 2.4593  | -2.7793 | -3.8561 |
| 73  | H | 1.3011  | -1.4547 | -3.6251 |
| 74  | H | 2.4869  | -1.8269 | -2.3684 |
| 75  | H | -5.9390 | 0.3917  | -3.7791 |
| 76  | H | -5.8603 | -0.9383 | -2.6218 |
| 77  | H | -5.6486 | 2.7771  | -2.9470 |
| 78  | H | -5.8768 | 4.3105  | -1.0139 |
| 79  | H | -5.6130 | -0.5703 | -0.2649 |
| 80  | H | -4.3084 | -2.2954 | -3.8778 |
| 81  | H | -4.4483 | -1.1193 | -5.2040 |
| 82  | H | -2.8479 | -1.5963 | -4.6081 |
| 83  | H | -3.9311 | 1.3324  | -4.8002 |
| 84  | H | -3.2936 | 1.8750  | -3.2334 |
| 85  | H | -2.3080 | 0.8471  | -4.2818 |
| 86  | H | 0.4057  | -4.6756 | 3.1017  |
| 87  | H | 1.6960  | -4.0252 | 4.1161  |
| 88  | H | 3.6401  | -2.8048 | 3.0138  |
| 89  | H | -0.2887 | -3.2267 | 5.5406  |
| 90  | H | -1.4651 | -3.7232 | 4.3036  |
| 91  | H | -1.4294 | -2.0425 | 4.8756  |
| 92  | H | 1.6182  | -1.6926 | 4.9458  |
| 93  | H | 0.5094  | -0.5079 | 4.2233  |
| 94  | H | 1.8645  | -1.1370 | 3.2783  |
| 95  | H | -6.3688 | 1.3803  | 2.7485  |
| 96  | H | -6.2007 | -0.2322 | 2.0499  |
| 97  | H | -5.9569 | 3.4112  | 1.2941  |
| 98  | H | -4.8119 | -1.1697 | 3.8037  |
| 99  | H | -5.0973 | 0.3328  | 4.7111  |
| 100 | H | -3.4425 | -0.2592 | 4.4749  |
| 101 | H | -4.4217 | 2.5582  | 3.7381  |
| 102 | H | -3.7110 | 2.6708  | 2.1153  |
| 103 | H | -2.7664 | 1.9831  | 3.4417  |
| 104 | H | 3.6678  | 0.7833  | 2.5268  |

|     |   |         |         |         |
|-----|---|---------|---------|---------|
| 105 | H | 3.2448  | 5.5853  | 1.3554  |
| 106 | H | 4.5765  | 2.5084  | 4.0511  |
| 107 | H | 4.3600  | 4.9216  | 3.4674  |
| 108 | H | 1.8880  | 5.8219  | -2.4982 |
| 109 | H | 0.3202  | 5.1340  | -1.9931 |
| 110 | H | 0.7942  | 6.7782  | -1.4424 |
| 111 | C | -2.3262 | 5.0305  | 0.1199  |
| 112 | H | -2.7256 | 5.9289  | 0.6019  |
| 113 | H | -1.9493 | 5.3081  | -0.8689 |
| 114 | H | -3.1401 | 4.3098  | -0.0048 |
| 115 | P | 5.7769  | 0.0243  | -1.0416 |
| 116 | F | 4.4785  | -0.6349 | -1.8096 |
| 117 | F | 6.3690  | -1.4720 | -0.7755 |
| 118 | F | 6.5726  | 0.1264  | -2.4510 |
| 119 | F | 7.0267  | 0.6861  | -0.2425 |
| 120 | F | 5.1246  | 1.5115  | -1.2759 |

|    |      | Ca      |         |         |
|----|------|---------|---------|---------|
|    | Atom | X       | Y       | Z       |
| 1  | C    | 0.1881  | 0.3663  | -1.7696 |
| 2  | C    | -0.4587 | 1.1415  | -2.8700 |
| 3  | C    | -1.0811 | 3.2504  | -3.7750 |
| 4  | H    | -0.4307 | 3.1970  | -4.6517 |
| 5  | H    | -2.0407 | 2.7918  | -4.0189 |
| 6  | C    | 1.0554  | -1.1718 | 2.0330  |
| 7  | C    | 2.2477  | -1.9464 | 2.5967  |
| 8  | C    | 3.0997  | -0.9470 | 3.4462  |
| 9  | H    | 2.5628  | -0.7494 | 4.3791  |
| 10 | H    | 4.0301  | -1.4636 | 3.7074  |
| 11 | C    | 3.3882  | 0.3648  | 2.7543  |
| 12 | C    | 4.4559  | 0.5241  | 1.8611  |
| 13 | H    | 5.1427  | -0.2994 | 1.6863  |
| 14 | C    | 4.6582  | 1.7455  | 1.2156  |
| 15 | H    | 5.4922  | 1.8598  | 0.5300  |
| 16 | C    | 2.5421  | 1.4561  | 2.9824  |
| 17 | H    | 1.7194  | 1.3453  | 3.6829  |
| 18 | C    | 1.7193  | -3.0666 | 3.5130  |
| 19 | H    | 2.5649  | -3.6005 | 3.9590  |
| 20 | H    | 1.0971  | -2.6625 | 4.3150  |
| 21 | H    | 1.1242  | -3.7886 | 2.9424  |
| 22 | C    | 3.0911  | -2.5519 | 1.4712  |
| 23 | H    | 3.9186  | -3.1226 | 1.9053  |
| 24 | H    | 2.4973  | -3.2256 | 0.8482  |
| 25 | H    | 3.5074  | -1.7801 | 0.8259  |
| 26 | C    | -2.1022 | -2.3406 | 0.7521  |
| 27 | C    | -2.6594 | -3.7531 | 0.5898  |
| 28 | C    | -4.2147 | -3.6731 | 0.7180  |
| 29 | H    | -4.6000 | -4.6821 | 0.5335  |
| 30 | H    | -4.4565 | -3.4152 | 1.7537  |
| 31 | C    | -4.8650 | -2.6783 | -0.2153 |
| 32 | C    | -5.2641 | -3.0348 | -1.5098 |
| 33 | H    | -5.1496 | -4.0620 | -1.8448 |
| 34 | C    | -5.8238 | -2.0821 | -2.3627 |
| 35 | H    | -6.1439 | -2.3711 | -3.3598 |
| 36 | C    | -5.0511 | -1.3544 | 0.2007  |
| 37 | H    | -4.7645 | -1.0734 | 1.2090  |
| 38 | C    | -2.1058 | -4.6179 | 1.7411  |
| 39 | H    | -2.3747 | -4.1991 | 2.7142  |
| 40 | H    | -2.5196 | -5.6289 | 1.6676  |
| 41 | H    | -1.0139 | -4.6930 | 1.6843  |
| 42 | C    | -2.2449 | -4.3537 | -0.7600 |
| 43 | H    | -2.6588 | -5.3636 | -0.8474 |
| 44 | H    | -2.6077 | -3.7555 | -1.5985 |
| 45 | H    | -1.1554 | -4.4221 | -0.8358 |
| 46 | O    | 1.0326  | -0.9532 | 0.7710  |
| 47 | O    | 0.1687  | -0.7837 | 2.8529  |
| 48 | O    | -1.4508 | -1.8471 | -0.2344 |
| 49 | O    | -2.3109 | -1.7368 | 1.8478  |
| 50 | O    | -0.4531 | 2.4527  | -2.7160 |
| 51 | Rh   | -0.5910 | -0.0168 | -0.0652 |



|     |    |         |         |         |
|-----|----|---------|---------|---------|
| 52  | Rh | -1.5358 | 0.1450  | 2.1673  |
| 53  | O  | -0.9118 | 0.5048  | -3.8033 |
| 54  | C  | -0.0387 | 2.4746  | 1.4459  |
| 55  | C  | 0.5597  | 3.8774  | 1.5674  |
| 56  | C  | 1.7395  | 3.8032  | 2.5920  |
| 57  | H  | 1.3126  | 3.6854  | 3.5931  |
| 58  | H  | 2.2432  | 4.7759  | 2.5644  |
| 59  | C  | 2.7221  | 2.6842  | 2.3368  |
| 60  | C  | 3.7982  | 2.8199  | 1.4498  |
| 61  | H  | 3.9751  | 3.7715  | 0.9565  |
| 62  | C  | -0.5205 | 4.8313  | 2.1107  |
| 63  | H  | -0.0924 | 5.8310  | 2.2377  |
| 64  | H  | -0.9023 | 4.4886  | 3.0754  |
| 65  | H  | -1.3614 | 4.9067  | 1.4123  |
| 66  | C  | 1.0551  | 4.3742  | 0.2019  |
| 67  | H  | 1.4426  | 5.3928  | 0.3097  |
| 68  | H  | 0.2416  | 4.3871  | -0.5282 |
| 69  | H  | 1.8523  | 3.7418  | -0.1938 |
| 70  | O  | 0.2118  | 1.8430  | 0.3641  |
| 71  | O  | -0.7213 | 2.0168  | 2.4105  |
| 72  | C  | -3.2231 | 1.2349  | 0.0745  |
| 73  | C  | -4.4580 | 1.9321  | -0.4985 |
| 74  | C  | -5.7045 | 1.0489  | -0.1733 |
| 75  | H  | -6.5696 | 1.5391  | -0.6337 |
| 76  | H  | -5.8581 | 1.0641  | 0.9100  |
| 77  | C  | -5.5910 | -0.3811 | -0.6482 |
| 78  | C  | -5.9828 | -0.7622 | -1.9380 |
| 79  | H  | -6.4248 | -0.0276 | -2.6055 |
| 80  | C  | -4.6070 | 3.2928  | 0.2126  |
| 81  | H  | -4.7060 | 3.1650  | 1.2935  |
| 82  | H  | -5.4982 | 3.8058  | -0.1637 |
| 83  | H  | -3.7385 | 3.9322  | 0.0162  |
| 84  | C  | -4.3155 | 2.1500  | -2.0096 |
| 85  | H  | -5.2227 | 2.6277  | -2.3941 |
| 86  | H  | -4.1617 | 1.2110  | -2.5448 |
| 87  | H  | -3.4687 | 2.8070  | -2.2223 |
| 88  | O  | -2.3092 | 0.8836  | -0.7484 |
| 89  | O  | -3.1842 | 1.0490  | 1.3291  |
| 90  | I  | 2.3744  | 0.6167  | -1.8938 |
| 91  | C  | 2.7369  | -1.5341 | -1.9183 |
| 92  | C  | 4.0538  | -1.9805 | -1.8029 |
| 93  | C  | 1.6510  | -2.3793 | -2.0491 |
| 94  | C  | 4.2656  | -3.3688 | -1.8161 |
| 95  | C  | 1.8949  | -3.7569 | -2.0602 |
| 96  | H  | 0.6395  | -2.0000 | -2.1242 |
| 97  | C  | 3.1953  | -4.2489 | -1.9443 |
| 98  | H  | 5.2797  | -3.7380 | -1.7252 |
| 99  | H  | 1.0549  | -4.4361 | -2.1636 |
| 100 | H  | 3.3765  | -5.3180 | -1.9558 |
| 101 | C  | 5.1833  | -1.0280 | -1.6655 |
| 102 | O  | 5.0458  | 0.1883  | -1.7746 |
| 103 | O  | 6.3424  | -1.6146 | -1.4085 |
| 104 | C  | 7.4891  | -0.7423 | -1.2678 |

|     |   |         |         |         |
|-----|---|---------|---------|---------|
| 105 | H | 7.6429  | -0.1792 | -2.1899 |
| 106 | H | 7.3316  | -0.0572 | -0.4329 |
| 107 | H | 8.3276  | -1.4073 | -1.0724 |
| 108 | C | -1.2248 | 4.6595  | -3.2448 |
| 109 | H | -1.6821 | 5.2883  | -4.0152 |
| 110 | H | -1.8648 | 4.6809  | -2.3570 |
| 111 | H | -0.2499 | 5.0829  | -2.9859 |

| C  |      |         |         |         |
|----|------|---------|---------|---------|
|    | Atom | X       | Y       | Z       |
| 1  | C    | -0.3875 | -0.3038 | -1.2981 |
| 2  | C    | -0.3896 | -1.4030 | -2.2981 |
| 3  | C    | -0.3940 | -3.6930 | -2.8576 |
| 4  | H    | -1.3263 | -3.5868 | -3.4139 |
| 5  | H    | 0.4534  | -3.5321 | -3.5281 |
| 6  | C    | 0.0076  | 1.8186  | 2.2095  |
| 7  | C    | -0.8594 | 2.9492  | 2.7697  |
| 8  | C    | -1.8735 | 2.3153  | 3.7815  |
| 9  | H    | -1.3396 | 2.1193  | 4.7169  |
| 10 | H    | -2.6298 | 3.0800  | 3.9934  |
| 11 | C    | -2.5154 | 1.0324  | 3.3060  |
| 12 | C    | -3.6059 | 1.0106  | 2.4254  |
| 13 | H    | -4.0602 | 1.9414  | 2.0979  |
| 14 | C    | -4.1113 | -0.2056 | 1.9628  |
| 15 | H    | -4.9369 | -0.2223 | 1.2574  |
| 16 | C    | -1.9666 | -0.1877 | 3.7151  |
| 17 | H    | -1.1209 | -0.1808 | 4.3981  |
| 18 | C    | 0.0341  | 3.9577  | 3.5123  |
| 19 | H    | -0.5900 | 4.7401  | 3.9571  |
| 20 | H    | 0.6043  | 3.4708  | 4.3070  |
| 21 | H    | 0.7396  | 4.4355  | 2.8231  |
| 22 | C    | -1.6096 | 3.6570  | 1.6356  |
| 23 | H    | -2.2039 | 4.4795  | 2.0475  |
| 24 | H    | -0.9138 | 4.0700  | 0.8997  |
| 25 | H    | -2.2805 | 2.9690  | 1.1224  |
| 26 | C    | 3.0639  | 1.8675  | 0.2548  |
| 27 | C    | 3.9491  | 3.0095  | -0.2456 |
| 28 | C    | 5.4241  | 2.4975  | -0.2847 |
| 29 | H    | 6.0330  | 3.3170  | -0.6830 |
| 30 | H    | 5.7491  | 2.3191  | 0.7448  |
| 31 | C    | 5.6266  | 1.2436  | -1.1031 |
| 32 | C    | 5.8957  | 1.2970  | -2.4769 |
| 33 | H    | 6.0068  | 2.2606  | -2.9667 |
| 34 | C    | 6.0379  | 0.1203  | -3.2140 |
| 35 | H    | 6.2606  | 0.1712  | -4.2762 |
| 36 | C    | 5.5152  | -0.0111 | -0.4924 |
| 37 | H    | 5.3252  | -0.0624 | 0.5746  |
| 38 | C    | 3.8490  | 4.1627  | 0.7752  |
| 39 | H    | 4.1644  | 3.8373  | 1.7699  |
| 40 | H    | 4.4922  | 4.9895  | 0.4556  |
| 41 | H    | 2.8212  | 4.5379  | 0.8417  |
| 42 | C    | 3.4972  | 3.5001  | -1.6241 |
| 43 | H    | 4.1684  | 4.2960  | -1.9642 |
| 44 | H    | 3.5072  | 2.6970  | -2.3646 |
| 45 | H    | 2.4839  | 3.9041  | -1.5734 |
| 46 | O    | -0.2660 | 1.4149  | 1.0271  |
| 47 | O    | 0.9213  | 1.3419  | 2.9487  |
| 48 | O    | 2.1178  | 1.4575  | -0.5035 |
| 49 | O    | 3.3238  | 1.3950  | 1.4025  |
| 50 | O    | -0.3798 | -2.6317 | -1.8488 |
| 51 | Rh   | 0.8687  | -0.0411 | 0.1307  |

|     |    |         |         |         |
|-----|----|---------|---------|---------|
| 52  | Rh | 2.1736  | -0.1128 | 2.1892  |
| 53  | O  | -0.3123 | -1.0298 | -3.4621 |
| 54  | C  | 0.1041  | -2.0656 | 2.1677  |
| 55  | C  | -0.7312 | -3.2497 | 2.6620  |
| 56  | C  | -1.7729 | -2.6890 | 3.6900  |
| 57  | H  | -1.2519 | -2.5102 | 4.6364  |
| 58  | H  | -2.5024 | -3.4879 | 3.8651  |
| 59  | C  | -2.4621 | -1.4152 | 3.2617  |
| 60  | C  | -3.5476 | -1.4121 | 2.3791  |
| 61  | H  | -3.9467 | -2.3436 | 1.9966  |
| 62  | C  | 0.1894  | -4.2508 | 3.3836  |
| 63  | H  | -0.4132 | -5.0745 | 3.7811  |
| 64  | H  | 0.7248  | -3.7785 | 4.2109  |
| 65  | H  | 0.9257  | -4.6728 | 2.6902  |
| 66  | C  | -1.4356 | -3.9476 | 1.4915  |
| 67  | H  | -2.0102 | -4.7968 | 1.8782  |
| 68  | H  | -0.7022 | -4.3294 | 0.7754  |
| 69  | H  | -2.1046 | -3.2843 | 0.9497  |
| 70  | O  | -0.1807 | -1.5966 | 1.0165  |
| 71  | O  | 1.0071  | -1.6116 | 2.9367  |
| 72  | C  | 3.0718  | -1.9228 | 0.0812  |
| 73  | C  | 3.9425  | -3.0221 | -0.5312 |
| 74  | C  | 5.4239  | -2.5286 | -0.5273 |
| 75  | H  | 6.0225  | -3.3103 | -1.0087 |
| 76  | H  | 5.7558  | -2.4561 | 0.5130  |
| 77  | C  | 5.6318  | -1.2016 | -1.2198 |
| 78  | C  | 5.9025  | -1.1219 | -2.5919 |
| 79  | H  | 6.0177  | -2.0338 | -3.1713 |
| 80  | C  | 3.8247  | -4.2707 | 0.3670  |
| 81  | H  | 4.1459  | -4.0528 | 1.3890  |
| 82  | H  | 4.4530  | -5.0724 | -0.0353 |
| 83  | H  | 2.7905  | -4.6326 | 0.3982  |
| 84  | C  | 3.4799  | -3.3590 | -1.9545 |
| 85  | H  | 4.1161  | -4.1508 | -2.3645 |
| 86  | H  | 3.5360  | -2.4909 | -2.6146 |
| 87  | H  | 2.4467  | -3.7138 | -1.9516 |
| 88  | O  | 2.1475  | -1.4357 | -0.6536 |
| 89  | O  | 3.3221  | -1.5699 | 1.2751  |
| 90  | I  | -2.3121 | 0.7384  | -1.2985 |
| 91  | C  | -1.4216 | 2.5839  | -1.9615 |
| 92  | C  | -2.1031 | 3.7874  | -1.7480 |
| 93  | C  | -0.2163 | 2.5258  | -2.6438 |
| 94  | C  | -1.5133 | 4.9721  | -2.2126 |
| 95  | C  | 0.3383  | 3.7181  | -3.1194 |
| 96  | H  | 0.2862  | 1.5822  | -2.8169 |
| 97  | C  | -0.3010 | 4.9375  | -2.8960 |
| 98  | H  | -2.0297 | 5.9099  | -2.0472 |
| 99  | H  | 1.2716  | 3.6799  | -3.6700 |
| 100 | H  | 0.1362  | 5.8586  | -3.2660 |
| 101 | C  | -3.4308 | 3.7990  | -1.0887 |
| 102 | O  | -4.0857 | 2.7782  | -0.8924 |
| 103 | O  | -3.8379 | 5.0106  | -0.7310 |
| 104 | C  | -5.1304 | 5.0860  | -0.0867 |

|     |   |         |         |         |
|-----|---|---------|---------|---------|
| 105 | H | -5.9028 | 4.6946  | -0.7511 |
| 106 | H | -5.1141 | 4.5132  | 0.8425  |
| 107 | H | -5.2869 | 6.1444  | 0.1122  |
| 108 | P | -4.1129 | -2.5957 | -1.4669 |
| 109 | F | -5.2804 | -3.2736 | -2.3641 |
| 110 | F | -3.3096 | -2.1339 | -2.8255 |
| 111 | F | -2.9155 | -1.8759 | -0.5692 |
| 112 | F | -4.9149 | -1.1629 | -1.4665 |
| 113 | F | -3.2716 | -3.9909 | -1.4459 |
| 114 | F | -4.8724 | -3.0220 | -0.0892 |
| 115 | C | -0.3132 | -5.0105 | -2.1206 |
| 116 | H | -0.3106 | -5.8281 | -2.8490 |
| 117 | H | 0.6037  | -5.0760 | -1.5262 |
| 118 | H | -1.1767 | -5.1265 | -1.4639 |

|    |      | C1      |         |         |
|----|------|---------|---------|---------|
|    | Atom | X       | Y       | Z       |
| 1  | C    | -3.9449 | -0.7754 | -1.2049 |
| 2  | C    | -4.7844 | -1.3703 | -2.3384 |
| 3  | C    | -5.5342 | -2.6193 | -1.7756 |
| 4  | H    | -6.2990 | -2.2688 | -1.0755 |
| 5  | H    | -6.0529 | -3.0888 | -2.6192 |
| 6  | C    | -4.6391 | -3.6175 | -1.0796 |
| 7  | C    | -3.9894 | -4.6446 | -1.7765 |
| 8  | H    | -4.1601 | -4.7646 | -2.8427 |
| 9  | C    | -3.1417 | -5.5262 | -1.1032 |
| 10 | H    | -2.6530 | -6.3287 | -1.6485 |
| 11 | C    | -4.4204 | -3.5034 | 0.2978  |
| 12 | H    | -4.9284 | -2.7179 | 0.8484  |
| 13 | C    | -5.8224 | -0.3189 | -2.7771 |
| 14 | H    | -6.4589 | -0.7379 | -3.5638 |
| 15 | H    | -6.4545 | -0.0154 | -1.9388 |
| 16 | H    | -5.3283 | 0.5730  | -3.1792 |
| 17 | C    | -3.8975 | -1.7558 | -3.5302 |
| 18 | H    | -4.5230 | -2.1767 | -4.3249 |
| 19 | H    | -3.3771 | -0.8798 | -3.9287 |
| 20 | H    | -3.1438 | -2.4948 | -3.2519 |
| 21 | C    | -2.7962 | 2.6260  | -0.6039 |
| 22 | C    | -3.0040 | 3.9316  | -1.3739 |
| 23 | C    | -2.9257 | 5.1090  | -0.3524 |
| 24 | H    | -3.0209 | 6.0369  | -0.9279 |
| 25 | H    | -3.7939 | 5.0442  | 0.3104  |
| 26 | C    | -1.6611 | 5.1273  | 0.4738  |
| 27 | C    | -0.5015 | 5.7771  | 0.0328  |
| 28 | H    | -0.5109 | 6.3182  | -0.9093 |
| 29 | C    | 0.6584  | 5.7510  | 0.8079  |
| 30 | H    | 1.5404  | 6.2818  | 0.4661  |
| 31 | C    | -1.6248 | 4.4590  | 1.7033  |
| 32 | H    | -2.5238 | 3.9678  | 2.0614  |
| 33 | C    | -4.4163 | 3.8993  | -1.9925 |
| 34 | H    | -5.1825 | 3.7775  | -1.2225 |
| 35 | H    | -4.6016 | 4.8366  | -2.5279 |
| 36 | H    | -4.5095 | 3.0750  | -2.7086 |
| 37 | C    | -1.9560 | 4.0940  | -2.4764 |
| 38 | H    | -2.1210 | 5.0411  | -3.0017 |
| 39 | H    | -0.9428 | 4.0934  | -2.0735 |
| 40 | H    | -2.0268 | 3.2821  | -3.2037 |
| 41 | O    | -2.6762 | -0.8070 | -1.3527 |
| 42 | O    | -4.5541 | -0.2971 | -0.1995 |
| 43 | O    | -1.7977 | 1.8944  | -0.9252 |
| 44 | O    | -3.6348 | 2.3540  | 0.3071  |
| 45 | Rh   | -3.4807 | 0.5849  | 1.3380  |
| 46 | C    | -2.2693 | -1.9242 | 2.0224  |
| 47 | C    | -2.0963 | -3.2402 | 2.7878  |
| 48 | C    | -3.3188 | -4.1550 | 2.4620  |
| 49 | H    | -4.2087 | -3.7079 | 2.9159  |
| 50 | H    | -3.1416 | -5.1131 | 2.9640  |
| 51 | C    | -3.5611 | -4.3667 | 0.9863  |

|     |    |         |         |         |
|-----|----|---------|---------|---------|
| 52  | C  | -2.9265 | -5.3888 | 0.2693  |
| 53  | H  | -2.2752 | -6.0867 | 0.7884  |
| 54  | C  | -2.0994 | -2.9218 | 4.2963  |
| 55  | H  | -2.0009 | -3.8514 | 4.8670  |
| 56  | H  | -3.0260 | -2.4241 | 4.5932  |
| 57  | H  | -1.2570 | -2.2713 | 4.5583  |
| 58  | C  | -0.7807 | -3.9261 | 2.4071  |
| 59  | H  | -0.7005 | -4.8830 | 2.9342  |
| 60  | H  | 0.0662  | -3.3032 | 2.6991  |
| 61  | H  | -0.7097 | -4.1054 | 1.3342  |
| 62  | O  | -1.3960 | -1.6433 | 1.1385  |
| 63  | O  | -3.2712 | -1.2032 | 2.3192  |
| 64  | C  | -0.9910 | 1.4946  | 2.5389  |
| 65  | C  | -0.0751 | 2.1091  | 3.6005  |
| 66  | C  | -0.4664 | 3.6105  | 3.7709  |
| 67  | H  | 0.2388  | 4.0454  | 4.4884  |
| 68  | H  | -1.4624 | 3.6547  | 4.2232  |
| 69  | C  | -0.4630 | 4.4000  | 2.4821  |
| 70  | C  | 0.6829  | 5.0615  | 2.0215  |
| 71  | H  | 1.5886  | 5.0504  | 2.6219  |
| 72  | C  | -0.3206 | 1.3684  | 4.9298  |
| 73  | H  | -1.3697 | 1.4319  | 5.2303  |
| 74  | H  | 0.2981  | 1.8124  | 5.7170  |
| 75  | H  | -0.0488 | 0.3102  | 4.8401  |
| 76  | C  | 1.3978  | 1.9694  | 3.1906  |
| 77  | H  | 2.0348  | 2.3563  | 3.9940  |
| 78  | H  | 1.6209  | 2.5242  | 2.2771  |
| 79  | H  | 1.6586  | 0.9244  | 3.0084  |
| 80  | O  | -0.4196 | 1.0809  | 1.4765  |
| 81  | O  | -2.2380 | 1.4344  | 2.7692  |
| 82  | Rh | -1.4716 | 0.1000  | 0.0335  |
| 83  | C  | 0.1307  | -0.4082 | -0.8785 |
| 84  | C  | 0.2429  | -1.5850 | -1.7759 |
| 85  | O  | 0.2792  | -2.7688 | -1.2134 |
| 86  | C  | 0.2222  | -3.9179 | -2.1306 |
| 87  | O  | 0.1446  | -1.3339 | -2.9689 |
| 88  | H  | 0.9471  | -3.7415 | -2.9232 |
| 89  | H  | -0.7888 | -3.9427 | -2.5446 |
| 90  | C  | 0.5411  | -5.1551 | -1.3241 |
| 91  | H  | -0.1732 | -5.2867 | -0.5084 |
| 92  | H  | 0.4769  | -6.0281 | -1.9823 |
| 93  | H  | 1.5542  | -5.1062 | -0.9204 |
| 94  | C  | 2.0268  | 3.5178  | -2.1914 |
| 95  | C  | 1.4879  | 2.2249  | -2.2376 |
| 96  | C  | 0.7156  | 1.7824  | -3.3001 |
| 97  | C  | 0.4606  | 2.6659  | -4.3538 |
| 98  | C  | 0.9650  | 3.9650  | -4.3308 |
| 99  | C  | 1.7404  | 4.3874  | -3.2556 |
| 100 | I  | 1.9604  | 0.8212  | -0.6509 |
| 101 | C  | 2.9427  | 3.9307  | -1.1029 |
| 102 | O  | 3.3018  | 5.2116  | -1.1568 |
| 103 | C  | 4.2587  | 5.6386  | -0.1621 |
| 104 | O  | 3.3588  | 3.1544  | -0.2502 |

|     |   |         |         |         |
|-----|---|---------|---------|---------|
| 105 | H | 0.3282  | 0.7717  | -3.3311 |
| 106 | H | -0.1384 | 2.3233  | -5.1915 |
| 107 | H | 0.7624  | 4.6461  | -5.1503 |
| 108 | H | 2.1539  | 5.3882  | -3.2307 |
| 109 | H | 5.1890  | 5.0788  | -0.2770 |
| 110 | H | 3.8547  | 5.4796  | 0.8395  |
| 111 | H | 4.4163  | 6.6981  | -0.3546 |
| 112 | C | 2.2255  | -2.2523 | 1.6421  |
| 113 | O | 1.6561  | -1.2517 | 1.2208  |
| 114 | O | 2.6083  | -3.2680 | 0.8739  |
| 115 | H | 2.5331  | -2.9999 | -0.0727 |
| 116 | C | 2.6418  | -2.4114 | 3.0823  |
| 117 | H | 2.1486  | -1.6299 | 3.6649  |
| 118 | H | 2.3369  | -3.3900 | 3.4651  |
| 119 | C | 4.1959  | -2.2840 | 3.1976  |
| 120 | C | 4.5934  | -2.2181 | 4.6496  |
| 121 | C | 5.3226  | -3.1468 | 5.2680  |
| 122 | H | 5.5820  | -3.0620 | 6.3198  |
| 123 | H | 5.6899  | -4.0260 | 4.7427  |
| 124 | H | 4.2380  | -1.3541 | 5.2105  |
| 125 | C | 4.6844  | -1.1028 | 2.3694  |
| 126 | C | 5.1864  | -1.3397 | 1.0848  |
| 127 | C | 5.5384  | -0.2823 | 0.2449  |
| 128 | C | 5.4018  | 1.0331  | 0.6889  |
| 129 | C | 4.9015  | 1.2819  | 1.9707  |
| 130 | C | 4.5443  | 0.2222  | 2.8043  |
| 131 | H | 4.1391  | 0.4344  | 3.7891  |
| 132 | H | 4.7726  | 2.3046  | 2.3122  |
| 133 | H | 5.6579  | 1.8626  | 0.0384  |
| 134 | H | 5.8832  | -0.4976 | -0.7606 |
| 135 | H | 5.2685  | -2.3559 | 0.7175  |
| 136 | H | 4.6225  | -3.1937 | 2.7635  |
| 137 | F | 2.9752  | -2.1403 | -1.5072 |
| 138 | P | 3.9987  | -2.7332 | -2.6988 |
| 139 | F | 4.9796  | -3.3109 | -3.8518 |
| 140 | F | 2.8087  | -2.4885 | -3.7872 |
| 141 | F | 4.5355  | -1.2115 | -2.9400 |
| 142 | F | 5.1469  | -2.9622 | -1.5632 |
| 143 | F | 3.4100  | -4.2276 | -2.3937 |



## TS2

|    | Atom | X       | Y       | Z       |
|----|------|---------|---------|---------|
| 1  | C    | 3.6649  | -0.7709 | -1.5003 |
| 2  | C    | 4.5284  | -0.5262 | -2.7418 |
| 3  | C    | 5.8688  | 0.1277  | -2.2816 |
| 4  | H    | 6.4289  | -0.6149 | -1.7049 |
| 5  | H    | 6.4479  | 0.3455  | -3.1862 |
| 6  | C    | 5.6915  | 1.3798  | -1.4545 |
| 7  | C    | 5.6227  | 2.6492  | -2.0429 |
| 8  | H    | 5.7421  | 2.7514  | -3.1181 |
| 9  | C    | 5.4201  | 3.7823  | -1.2533 |
| 10 | H    | 5.3818  | 4.7641  | -1.7165 |
| 11 | C    | 5.5576  | 1.2798  | -0.0646 |
| 12 | H    | 5.6238  | 0.3028  | 0.4019  |
| 13 | C    | 4.8335  | -1.8945 | -3.3841 |
| 14 | H    | 5.4789  | -1.7549 | -4.2580 |
| 15 | H    | 5.3386  | -2.5574 | -2.6768 |
| 16 | H    | 3.9106  | -2.3823 | -3.7184 |
| 17 | C    | 3.8032  | 0.3710  | -3.7521 |
| 18 | H    | 4.4354  | 0.5053  | -4.6367 |
| 19 | H    | 2.8553  | -0.0748 | -4.0656 |
| 20 | H    | 3.5880  | 1.3546  | -3.3304 |
| 21 | C    | 1.2663  | -3.3874 | -0.7683 |
| 22 | C    | 0.8239  | -4.5997 | -1.5938 |
| 23 | C    | 0.3101  | -5.6903 | -0.6020 |
| 24 | H    | -0.0953 | -6.5094 | -1.2070 |
| 25 | H    | 1.1706  | -6.0840 | -0.0523 |
| 26 | C    | -0.7234 | -5.1922 | 0.3800  |
| 27 | C    | -2.0904 | -5.1724 | 0.0753  |
| 28 | H    | -2.4387 | -5.5615 | -0.8774 |
| 29 | C    | -3.0087 | -4.6757 | 1.0011  |
| 30 | H    | -4.0673 | -4.6957 | 0.7663  |
| 31 | C    | -0.3106 | -4.7059 | 1.6256  |
| 32 | H    | 0.7457  | -4.7284 | 1.8743  |
| 33 | C    | 2.0538  | -5.1473 | -2.3447 |
| 34 | H    | 2.8531  | -5.4173 | -1.6503 |
| 35 | H    | 1.7676  | -6.0374 | -2.9156 |
| 36 | H    | 2.4435  | -4.4033 | -3.0487 |
| 37 | C    | -0.2657 | -4.2208 | -2.5972 |
| 38 | H    | -0.5594 | -5.1069 | -3.1706 |
| 39 | H    | -1.1501 | -3.8193 | -2.1024 |
| 40 | H    | 0.0978  | -3.4655 | -3.2971 |
| 41 | O    | 2.5281  | -0.1924 | -1.4562 |
| 42 | O    | 4.1362  | -1.5356 | -0.6034 |
| 43 | O    | 0.6268  | -2.2906 | -0.9165 |
| 44 | O    | 2.2460  | -3.5646 | 0.0176  |
| 45 | Rh   | 3.0037  | -1.9747 | 1.0715  |
| 46 | C    | 3.0875  | 0.7977  | 1.8988  |
| 47 | C    | 3.6368  | 2.0174  | 2.6476  |
| 48 | C    | 5.1244  | 2.2281  | 2.2269  |
| 49 | H    | 5.7027  | 1.3686  | 2.5792  |
| 50 | H    | 5.4862  | 3.1104  | 2.7673  |
| 51 | C    | 5.3301  | 2.4017  | 0.7403  |

|     |    |         |         |         |
|-----|----|---------|---------|---------|
| 52  | C  | 5.2704  | 3.6610  | 0.1293  |
| 53  | H  | 5.1163  | 4.5481  | 0.7377  |
| 54  | C  | 3.5861  | 1.7034  | 4.1570  |
| 55  | H  | 3.9847  | 2.5520  | 4.7233  |
| 56  | H  | 4.1774  | 0.8148  | 4.3936  |
| 57  | H  | 2.5545  | 1.5305  | 4.4849  |
| 58  | C  | 2.8059  | 3.2699  | 2.3502  |
| 59  | H  | 3.2457  | 4.1316  | 2.8639  |
| 60  | H  | 1.7839  | 3.1456  | 2.7118  |
| 61  | H  | 2.7620  | 3.4849  | 1.2816  |
| 62  | O  | 2.0553  | 0.9710  | 1.1700  |
| 63  | O  | 3.6932  | -0.3052 | 2.0637  |
| 64  | C  | 0.5547  | -1.8283 | 2.6390  |
| 65  | C  | -0.3792 | -2.0960 | 3.8239  |
| 66  | C  | -0.6971 | -3.6238 | 3.8612  |
| 67  | H  | -1.4276 | -3.7793 | 4.6635  |
| 68  | H  | 0.2173  | -4.1545 | 4.1451  |
| 69  | C  | -1.2151 | -4.1839 | 2.5571  |
| 70  | C  | -2.5776 | -4.1787 | 2.2323  |
| 71  | H  | -3.3027 | -3.8015 | 2.9482  |
| 72  | C  | 0.3551  | -1.7055 | 5.1209  |
| 73  | H  | 1.2880  | -2.2647 | 5.2292  |
| 74  | H  | -0.2842 | -1.9181 | 5.9846  |
| 75  | H  | 0.5910  | -0.6350 | 5.1281  |
| 76  | C  | -1.6685 | -1.2758 | 3.6880  |
| 77  | H  | -2.3124 | -1.4606 | 4.5552  |
| 78  | H  | -2.2212 | -1.5308 | 2.7819  |
| 79  | H  | -1.4441 | -0.2077 | 3.6445  |
| 80  | O  | 0.0803  | -1.1137 | 1.6959  |
| 81  | O  | 1.7216  | -2.3280 | 2.6660  |
| 82  | Rh | 1.2378  | -0.5905 | 0.0973  |
| 83  | C  | -0.1498 | 0.5581  | -0.6528 |
| 84  | C  | 0.1621  | 1.5468  | -1.7265 |
| 85  | O  | 0.6974  | 2.6788  | -1.3023 |
| 86  | C  | 1.3379  | 3.5190  | -2.3264 |
| 87  | O  | 0.1024  | 1.1699  | -2.8828 |
| 88  | H  | 0.5759  | 3.7686  | -3.0619 |
| 89  | H  | 2.1193  | 2.9140  | -2.7893 |
| 90  | C  | 1.8943  | 4.7326  | -1.6186 |
| 91  | H  | 2.6282  | 4.4425  | -0.8626 |
| 92  | H  | 2.3967  | 5.3693  | -2.3543 |
| 93  | H  | 1.0937  | 5.3123  | -1.1537 |
| 94  | C  | -3.6513 | -2.3274 | -2.1701 |
| 95  | C  | -2.6066 | -1.3913 | -2.2000 |
| 96  | C  | -1.7976 | -1.2183 | -3.3097 |
| 97  | C  | -2.0251 | -2.0212 | -4.4325 |
| 98  | C  | -3.0341 | -2.9822 | -4.4283 |
| 99  | C  | -3.8409 | -3.1318 | -3.3048 |
| 100 | I  | -2.3029 | -0.1256 | -0.4620 |
| 101 | C  | -4.5861 | -2.4078 | -1.0247 |
| 102 | O  | -5.4684 | -3.4009 | -1.1192 |
| 103 | C  | -6.4876 | -3.4435 | -0.0955 |
| 104 | O  | -4.5705 | -1.6115 | -0.0924 |

|     |   |         |         |         |
|-----|---|---------|---------|---------|
| 105 | H | -1.0069 | -0.4801 | -3.3159 |
| 106 | H | -1.3963 | -1.8876 | -5.3069 |
| 107 | H | -3.2015 | -3.6061 | -5.2997 |
| 108 | H | -4.6449 | -3.8575 | -3.2931 |
| 109 | H | -7.0765 | -2.5245 | -0.1210 |
| 110 | H | -6.0306 | -3.5601 | 0.8889  |
| 111 | H | -7.1025 | -4.3067 | -0.3422 |
| 112 | C | -0.7475 | 2.7687  | 1.5334  |
| 113 | O | -0.7603 | 1.6263  | 1.0511  |
| 114 | O | -0.6009 | 3.8792  | 0.8501  |
| 115 | H | -0.6038 | 3.6864  | -0.1146 |
| 116 | C | -0.9749 | 2.9719  | 3.0071  |
| 117 | H | -0.8515 | 2.0076  | 3.5034  |
| 118 | H | -0.2323 | 3.6732  | 3.3982  |
| 119 | C | -2.3991 | 3.5515  | 3.2762  |
| 120 | C | -2.6312 | 3.6235  | 4.7642  |
| 121 | C | -2.7933 | 4.7610  | 5.4395  |
| 122 | H | -2.9560 | 4.7682  | 6.5137  |
| 123 | H | -2.7732 | 5.7278  | 4.9406  |
| 124 | H | -2.6524 | 2.6733  | 5.2970  |
| 125 | C | -3.4571 | 2.7497  | 2.5311  |
| 126 | C | -3.9577 | 3.2530  | 1.3269  |
| 127 | C | -4.8716 | 2.5218  | 0.5675  |
| 128 | C | -5.3068 | 1.2747  | 1.0150  |
| 129 | C | -4.8113 | 0.7599  | 2.2177  |
| 130 | C | -3.8913 | 1.4906  | 2.9698  |
| 131 | H | -3.5118 | 1.0719  | 3.8965  |
| 132 | H | -5.1321 | -0.2191 | 2.5607  |
| 133 | H | -6.0056 | 0.6908  | 0.4248  |
| 134 | H | -5.2055 | 2.9209  | -0.3845 |
| 135 | H | -3.6085 | 4.2085  | 0.9557  |
| 136 | H | -2.4090 | 4.5705  | 2.8761  |
| 137 | F | -2.1806 | 3.0388  | -1.2114 |
| 138 | P | -2.6040 | 4.2035  | -2.3155 |
| 139 | F | -2.9872 | 5.3520  | -3.3952 |
| 140 | F | -1.7179 | 3.4194  | -3.4425 |
| 141 | F | -3.9132 | 3.3200  | -2.7180 |
| 142 | F | -3.4673 | 4.9749  | -1.1653 |
| 143 | F | -1.2646 | 5.0449  | -1.8551 |

**D**

|    | Atom | X       | Y       | Z       |
|----|------|---------|---------|---------|
| 1  | C    | 3.2239  | -1.8723 | -1.5157 |
| 2  | C    | 4.2234  | -1.8322 | -2.6769 |
| 3  | C    | 5.6632  | -1.7765 | -2.0737 |
| 4  | H    | 5.8728  | -2.7436 | -1.6066 |
| 5  | H    | 6.3595  | -1.6598 | -2.9122 |
| 6  | C    | 5.8679  | -0.6756 | -1.0590 |
| 7  | C    | 6.2679  | 0.6136  | -1.4341 |
| 8  | H    | 6.4867  | 0.8279  | -2.4767 |
| 9  | C    | 6.4036  | 1.6183  | -0.4738 |
| 10 | H    | 6.7262  | 2.6116  | -0.7733 |
| 11 | C    | 5.6258  | -0.9297 | 0.2960  |
| 12 | H    | 5.3298  | -1.9285 | 0.5989  |
| 13 | C    | 4.0715  | -3.1346 | -3.4874 |
| 14 | H    | 4.8032  | -3.1489 | -4.3025 |
| 15 | H    | 4.2324  | -4.0118 | -2.8556 |
| 16 | H    | 3.0705  | -3.2044 | -3.9282 |
| 17 | C    | 3.9709  | -0.6248 | -3.5841 |
| 18 | H    | 4.6844  | -0.6353 | -4.4153 |
| 19 | H    | 2.9585  | -0.6521 | -3.9976 |
| 20 | H    | 4.0926  | 0.3108  | -3.0373 |
| 21 | C    | -0.0825 | -3.3282 | -1.2484 |
| 22 | C    | -0.9234 | -4.1089 | -2.2630 |
| 23 | C    | -1.7255 | -5.2023 | -1.4922 |
| 24 | H    | -2.3386 | -5.7318 | -2.2306 |
| 25 | H    | -1.0122 | -5.9226 | -1.0805 |
| 26 | C    | -2.5953 | -4.6583 | -0.3829 |
| 27 | C    | -3.9297 | -4.2986 | -0.6070 |
| 28 | H    | -4.3696 | -4.4437 | -1.5900 |
| 29 | C    | -4.7008 | -3.7708 | 0.4292  |
| 30 | H    | -5.7400 | -3.5201 | 0.2466  |
| 31 | C    | -2.0617 | -4.4775 | 0.8991  |
| 32 | H    | -1.0361 | -4.7732 | 1.0882  |
| 33 | C    | 0.0472  | -4.7982 | -3.2441 |
| 34 | H    | 0.7398  | -5.4587 | -2.7160 |
| 35 | H    | -0.5218 | -5.3914 | -3.9683 |
| 36 | H    | 0.6315  | -4.0551 | -3.7987 |
| 37 | C    | -1.8677 | -3.1835 | -3.0320 |
| 38 | H    | -2.4447 | -3.7681 | -3.7572 |
| 39 | H    | -2.5660 | -2.6769 | -2.3652 |
| 40 | H    | -1.3085 | -2.4177 | -3.5745 |
| 41 | O    | 2.3845  | -0.9163 | -1.4158 |
| 42 | O    | 3.3098  | -2.8644 | -0.7276 |
| 43 | O    | -0.2411 | -2.0628 | -1.1790 |
| 44 | O    | 0.7271  | -4.0080 | -0.5445 |
| 45 | Rh   | 1.9556  | -3.0647 | 0.8096  |
| 46 | C    | 3.0303  | -0.7107 | 2.1396  |
| 47 | C    | 3.9465  | 0.0192  | 3.1290  |
| 48 | C    | 5.4252  | -0.2589 | 2.7117  |
| 49 | H    | 5.6355  | -1.3166 | 2.8971  |
| 50 | H    | 6.0625  | 0.3245  | 3.3863  |
| 51 | C    | 5.7439  | 0.0672  | 1.2712  |

|     |    |         |         |         |
|-----|----|---------|---------|---------|
| 52  | C  | 6.1393  | 1.3502  | 0.8705  |
| 53  | H  | 6.2584  | 2.1346  | 1.6130  |
| 54  | C  | 3.7085  | -0.5748 | 4.5320  |
| 55  | H  | 4.3752  | -0.0913 | 5.2543  |
| 56  | H  | 3.9012  | -1.6504 | 4.5417  |
| 57  | H  | 2.6754  | -0.4054 | 4.8571  |
| 58  | C  | 3.6646  | 1.5237  | 3.1561  |
| 59  | H  | 4.3571  | 2.0120  | 3.8501  |
| 60  | H  | 2.6481  | 1.7135  | 3.5092  |
| 61  | H  | 3.7817  | 1.9802  | 2.1720  |
| 62  | O  | 2.2333  | -0.0134 | 1.4223  |
| 63  | O  | 3.1353  | -1.9736 | 2.1002  |
| 64  | C  | -0.3624 | -2.2093 | 2.3572  |
| 65  | C  | -1.4370 | -2.3201 | 3.4441  |
| 66  | C  | -2.1666 | -3.6902 | 3.2916  |
| 67  | H  | -2.9249 | -3.7364 | 4.0818  |
| 68  | H  | -1.4410 | -4.4852 | 3.4888  |
| 69  | C  | -2.8088 | -3.9164 | 1.9416  |
| 70  | C  | -4.1430 | -3.5689 | 1.6927  |
| 71  | H  | -4.7481 | -3.1542 | 2.4945  |
| 72  | C  | -0.7196 | -2.2890 | 4.8099  |
| 73  | H  | 0.0027  | -3.1056 | 4.8938  |
| 74  | H  | -1.4549 | -2.3866 | 5.6160  |
| 75  | H  | -0.1880 | -1.3403 | 4.9486  |
| 76  | C  | -2.4345 | -1.1593 | 3.3520  |
| 77  | H  | -3.1775 | -1.2548 | 4.1522  |
| 78  | H  | -2.9582 | -1.1440 | 2.3943  |
| 79  | H  | -1.9263 | -0.1992 | 3.4675  |
| 80  | O  | -0.4001 | -1.1796 | 1.6048  |
| 81  | O  | 0.4991  | -3.1391 | 2.2838  |
| 82  | Rh | 0.9562  | -0.9577 | 0.0830  |
| 83  | C  | 0.1549  | 0.8472  | -0.4363 |
| 84  | C  | 0.5350  | 1.3924  | -1.7908 |
| 85  | O  | 1.6926  | 2.0839  | -1.7519 |
| 86  | C  | 2.2649  | 2.5390  | -3.0344 |
| 87  | O  | -0.0069 | 1.0765  | -2.8235 |
| 88  | H  | 1.5400  | 3.2228  | -3.4688 |
| 89  | H  | 2.3695  | 1.6527  | -3.6573 |
| 90  | C  | 3.5871  | 3.1980  | -2.7168 |
| 91  | H  | 4.2566  | 2.5153  | -2.1850 |
| 92  | H  | 4.0684  | 3.4889  | -3.6563 |
| 93  | H  | 3.4348  | 4.0994  | -2.1182 |
| 94  | C  | -4.6932 | -0.6242 | -1.6970 |
| 95  | C  | -3.4297 | -0.0471 | -1.9182 |
| 96  | C  | -2.8717 | 0.0339  | -3.1859 |
| 97  | C  | -3.5697 | -0.5042 | -4.2704 |
| 98  | C  | -4.8058 | -1.1183 | -4.0805 |
| 99  | C  | -5.3612 | -1.1692 | -2.8063 |
| 100 | I  | -2.3184 | 0.7869  | -0.2594 |
| 101 | C  | -5.3639 | -0.6048 | -0.3707 |
| 102 | O  | -6.5646 | -1.1991 | -0.3841 |
| 103 | C  | -7.2913 | -1.1604 | 0.8601  |
| 104 | O  | -4.9006 | -0.0745 | 0.6266  |

|     |   |         |         |         |
|-----|---|---------|---------|---------|
| 105 | H | -1.8985 | 0.4812  | -3.3266 |
| 106 | H | -3.1298 | -0.4453 | -5.2609 |
| 107 | H | -5.3437 | -1.5442 | -4.9209 |
| 108 | H | -6.3339 | -1.6180 | -2.6490 |
| 109 | H | -7.4872 | -0.1253 | 1.1480  |
| 110 | H | -6.7192 | -1.6559 | 1.6473  |
| 111 | H | -8.2218 | -1.6909 | 0.6655  |
| 112 | C | 0.9368  | 2.6331  | 1.1587  |
| 113 | O | 0.1355  | 1.7301  | 0.6975  |
| 114 | O | 1.9657  | 3.0766  | 0.5512  |
| 115 | H | 2.0218  | 2.7368  | -0.4048 |
| 116 | C | 0.5953  | 3.2064  | 2.4843  |
| 117 | H | 0.3006  | 2.4000  | 3.1584  |
| 118 | H | 1.4973  | 3.6833  | 2.8689  |
| 119 | C | -0.5343 | 4.2844  | 2.3729  |
| 120 | C | -0.4865 | 5.1590  | 3.6048  |
| 121 | C | -0.2530 | 6.4705  | 3.5600  |
| 122 | H | -0.2427 | 7.0801  | 4.4592  |
| 123 | H | -0.0730 | 6.9795  | 2.6156  |
| 124 | H | -0.6768 | 4.6622  | 4.5563  |
| 125 | C | -1.9298 | 3.7041  | 2.1990  |
| 126 | C | -2.7941 | 4.2837  | 1.2623  |
| 127 | C | -4.1109 | 3.8393  | 1.1423  |
| 128 | C | -4.5837 | 2.8090  | 1.9572  |
| 129 | C | -3.7290 | 2.2247  | 2.8936  |
| 130 | C | -2.4130 | 2.6723  | 3.0157  |
| 131 | H | -1.7669 | 2.2115  | 3.7583  |
| 132 | H | -4.0822 | 1.4132  | 3.5221  |
| 133 | H | -5.6021 | 2.4495  | 1.8531  |
| 134 | H | -4.7649 | 4.2951  | 0.4041  |
| 135 | H | -2.4253 | 5.0667  | 0.6124  |
| 136 | H | -0.3120 | 4.9097  | 1.5079  |
| 137 | F | -0.5426 | 3.8312  | -0.7909 |
| 138 | P | -0.3698 | 5.2008  | -1.7083 |
| 139 | F | -0.1825 | 6.5376  | -2.6084 |
| 140 | F | -0.3754 | 4.2675  | -3.0522 |
| 141 | F | -1.9922 | 5.3315  | -1.7890 |
| 142 | F | -0.3647 | 6.1014  | -0.3370 |
| 143 | F | 1.2558  | 5.0292  | -1.5882 |

|    |      | C <sub>61</sub> |         |         |
|----|------|-----------------|---------|---------|
|    | Atom | X               | Y       | Z       |
| 1  | C    | 3.9481          | 0.2467  | 1.3475  |
| 2  | C    | 4.8139          | -0.0214 | 2.5815  |
| 3  | C    | 5.9423          | -1.0195 | 2.1676  |
| 4  | H    | 6.6304          | -0.4942 | 1.4978  |
| 5  | H    | 6.4987          | -1.2692 | 3.0783  |
| 6  | C    | 5.4411          | -2.2733 | 1.4900  |
| 7  | C    | 5.0522          | -3.4043 | 2.2194  |
| 8  | H    | 5.1570          | -3.4102 | 3.3008  |
| 9  | C    | 4.5472          | -4.5279 | 1.5628  |
| 10 | H    | 4.2583          | -5.4044 | 2.1360  |
| 11 | C    | 5.3234          | -2.3054 | 0.0958  |
| 12 | H    | 5.6351          | -1.4390 | -0.4791 |
| 13 | C    | 5.4577          | 1.3080  | 3.0215  |
| 14 | H    | 6.1102          | 1.1318  | 3.8833  |
| 15 | H    | 6.0525          | 1.7442  | 2.2150  |
| 16 | H    | 4.6915          | 2.0333  | 3.3186  |
| 17 | C    | 3.9694          | -0.5953 | 3.7271  |
| 18 | H    | 4.6108          | -0.7708 | 4.5976  |
| 19 | H    | 3.1777          | 0.1021  | 4.0164  |
| 20 | H    | 3.4996          | -1.5391 | 3.4448  |
| 21 | C    | 1.9296          | 3.1296  | 0.3720  |
| 22 | C    | 1.6673          | 4.4780  | 1.0474  |
| 23 | C    | 1.2588          | 5.4947  | -0.0648 |
| 24 | H    | 0.9916          | 6.4298  | 0.4407  |
| 25 | H    | 2.1394          | 5.6967  | -0.6823 |
| 26 | C    | 0.1263          | 5.0254  | -0.9472 |
| 27 | C    | -1.2163         | 5.2263  | -0.6017 |
| 28 | H    | -1.4666         | 5.7678  | 0.3062  |
| 29 | C    | -2.2333         | 4.7538  | -1.4319 |
| 30 | H    | -3.2685         | 4.9425  | -1.1681 |
| 31 | C    | 0.4147          | 4.3466  | -2.1365 |
| 32 | H    | 1.4525          | 4.1989  | -2.4187 |
| 33 | C    | 2.9792          | 4.9534  | 1.7025  |
| 34 | H    | 3.7821          | 5.0354  | 0.9658  |
| 35 | H    | 2.8226          | 5.9348  | 2.1628  |
| 36 | H    | 3.2980          | 4.2574  | 2.4869  |
| 37 | C    | 0.5698          | 4.3615  | 2.1076  |
| 38 | H    | 0.4016          | 5.3415  | 2.5672  |
| 39 | H    | -0.3708         | 4.0121  | 1.6810  |
| 40 | H    | 0.8609          | 3.6606  | 2.8936  |
| 41 | O    | 2.7333          | -0.1451 | 1.4015  |
| 42 | O    | 4.4871          | 0.8316  | 0.3590  |
| 43 | O    | 1.1552          | 2.1561  | 0.6670  |
| 44 | O    | 2.8981          | 3.0679  | -0.4433 |
| 45 | Rh   | 3.3574          | 1.2695  | -1.3222 |
| 46 | C    | 2.9692          | -1.5324 | -1.8835 |
| 47 | C    | 3.2493          | -2.8752 | -2.5633 |
| 48 | C    | 4.6484          | -3.3730 | -2.0801 |
| 49 | H    | 5.4096          | -2.7121 | -2.5062 |
| 50 | H    | 4.7994          | -4.3684 | -2.5131 |
| 51 | C    | 4.8072          | -3.4178 | -0.5786 |

|     |    |         |         |         |
|-----|----|---------|---------|---------|
| 52  | C  | 4.4212  | -4.5352 | 0.1727  |
| 53  | H  | 4.0351  | -5.4166 | -0.3317 |
| 54  | C  | 3.3017  | -2.6407 | -4.0864 |
| 55  | H  | 3.5238  | -3.5854 | -4.5942 |
| 56  | H  | 4.0730  | -1.9120 | -4.3480 |
| 57  | H  | 2.3379  | -2.2737 | -4.4576 |
| 58  | C  | 2.1569  | -3.8987 | -2.2357 |
| 59  | H  | 2.4054  | -4.8571 | -2.7043 |
| 60  | H  | 1.1932  | -3.5678 | -2.6299 |
| 61  | H  | 2.0469  | -4.0522 | -1.1613 |
| 62  | O  | 1.9764  | -1.4742 | -1.0839 |
| 63  | O  | 3.7440  | -0.5654 | -2.1577 |
| 64  | C  | 0.8538  | 1.3026  | -2.8024 |
| 65  | C  | -0.0845 | 1.5312  | -3.9900 |
| 66  | C  | -0.2146 | 3.0718  | -4.2116 |
| 67  | H  | -0.9621 | 3.2195  | -4.9995 |
| 68  | H  | 0.7414  | 3.4438  | -4.5941 |
| 69  | C  | -0.5924 | 3.8467  | -2.9703 |
| 70  | C  | -1.9273 | 4.0631  | -2.6058 |
| 71  | H  | -2.7272 | 3.7053  | -3.2480 |
| 72  | C  | 0.5509  | 0.8934  | -5.2403 |
| 73  | H  | 1.5430  | 1.3084  | -5.4357 |
| 74  | H  | -0.0862 | 1.0804  | -6.1113 |
| 75  | H  | 0.6472  | -0.1915 | -5.1166 |
| 76  | C  | -1.4590 | 0.9006  | -3.7230 |
| 77  | H  | -2.0903 | 1.0197  | -4.6104 |
| 78  | H  | -1.9640 | 1.3706  | -2.8770 |
| 79  | H  | -1.3702 | -0.1643 | -3.4956 |
| 80  | O  | 0.3236  | 0.7957  | -1.7596 |
| 81  | O  | 2.0759  | 1.6282  | -2.9155 |
| 82  | Rh | 1.4578  | 0.2823  | -0.1484 |
| 83  | C  | -0.0216 | -0.5061 | 0.7621  |
| 84  | C  | 0.1206  | -1.5898 | 1.7828  |
| 85  | O  | 0.2657  | -1.0836 | 2.9880  |
| 86  | C  | 0.3725  | -2.0241 | 4.1115  |
| 87  | O  | 0.2265  | -2.7741 | 1.5039  |
| 88  | H  | 1.3672  | -2.4718 | 4.0626  |
| 89  | H  | -0.3901 | -2.7883 | 3.9679  |
| 90  | C  | 0.1501  | -1.2137 | 5.3682  |
| 91  | H  | -0.8568 | -0.7873 | 5.3656  |
| 92  | H  | 0.2493  | -1.8675 | 6.2405  |
| 93  | H  | 0.8858  | -0.4074 | 5.4547  |
| 94  | C  | -3.1057 | 2.7576  | 1.8444  |
| 95  | C  | -2.1644 | 1.7234  | 1.9365  |
| 96  | C  | -1.3396 | 1.5787  | 3.0388  |
| 97  | C  | -1.4470 | 2.5014  | 4.0832  |
| 98  | C  | -2.3564 | 3.5554  | 4.0124  |
| 99  | C  | -3.1798 | 3.6816  | 2.8983  |
| 100 | I  | -2.0480 | 0.2820  | 0.3202  |
| 101 | C  | -4.0469 | 2.8239  | 0.7069  |
| 102 | O  | -4.8388 | 3.8926  | 0.7147  |
| 103 | C  | -5.8471 | 3.9413  | -0.3202 |
| 104 | O  | -4.1072 | 1.9511  | -0.1538 |



|     |   |         |         |         |
|-----|---|---------|---------|---------|
| 105 | H | -0.6275 | 0.7718  | 3.1084  |
| 106 | H | -0.8053 | 2.3854  | 4.9509  |
| 107 | H | -2.4316 | 4.2709  | 4.8241  |
| 108 | H | -3.9066 | 4.4821  | 2.8334  |
| 109 | H | -6.5166 | 3.0843  | -0.2244 |
| 110 | H | -5.3770 | 3.9334  | -1.3053 |
| 111 | H | -6.3822 | 4.8738  | -0.1523 |
| 112 | C | -1.1938 | -3.0116 | -1.4886 |
| 113 | O | -1.0627 | -1.8042 | -1.2861 |
| 114 | O | -0.8555 | -3.9438 | -0.6167 |
| 115 | H | -0.4904 | -3.5001 | 0.1974  |
| 116 | C | -1.8016 | -3.5778 | -2.7450 |
| 117 | H | -1.6463 | -2.8750 | -3.5666 |
| 118 | H | -1.3124 | -4.5262 | -2.9829 |
| 119 | C | -3.3253 | -3.8287 | -2.5299 |
| 120 | C | -3.8778 | -4.6318 | -3.6828 |
| 121 | C | -4.3986 | -5.8526 | -3.5616 |
| 122 | H | -4.7862 | -6.3954 | -4.4194 |
| 123 | H | -4.4593 | -6.3526 | -2.5971 |
| 124 | H | -3.8325 | -4.1591 | -4.6637 |
| 125 | C | -4.0738 | -2.5186 | -2.3370 |
| 126 | C | -4.6415 | -2.2050 | -1.0976 |
| 127 | C | -5.3290 | -1.0027 | -0.9180 |
| 128 | C | -5.4617 | -0.1028 | -1.9758 |
| 129 | C | -4.8858 | -0.4017 | -3.2126 |
| 130 | C | -4.1960 | -1.6004 | -3.3895 |
| 131 | H | -3.7475 | -1.8170 | -4.3554 |
| 132 | H | -4.9713 | 0.2983  | -4.0392 |
| 133 | H | -5.9875 | 0.8347  | -1.8302 |
| 134 | H | -5.7408 | -0.7717 | 0.0582  |
| 135 | H | -4.5279 | -2.8835 | -0.2594 |
| 136 | H | -3.4327 | -4.4255 | -1.6176 |
| 137 | F | -2.6407 | -2.7206 | 1.3840  |
| 138 | P | -3.4990 | -2.5865 | 2.7786  |
| 139 | F | -4.3370 | -2.4465 | 4.1670  |
| 140 | F | -2.4858 | -1.3798 | 3.2663  |
| 141 | F | -4.4628 | -1.4617 | 2.0772  |
| 142 | F | -4.4938 | -3.7722 | 2.2665  |
| 143 | F | -2.5082 | -3.6870 | 3.4758  |

|    |      | C <sub>2</sub> |         |         |
|----|------|----------------|---------|---------|
|    | Atom | X              | Y       | Z       |
| 1  | C    | 3.4120         | -1.6457 | 0.8033  |
| 2  | C    | 4.9118         | -1.3390 | 0.8392  |
| 3  | C    | 5.3570         | -1.2523 | 2.3322  |
| 4  | H    | 5.2472         | -2.2445 | 2.7806  |
| 5  | H    | 6.4255         | -1.0087 | 2.3321  |
| 6  | C    | 4.5836         | -0.2387 | 3.1430  |
| 7  | C    | 5.0001         | 1.0943  | 3.2502  |
| 8  | H    | 5.9280         | 1.4076  | 2.7796  |
| 9  | C    | 4.2351         | 2.0167  | 3.9656  |
| 10 | H    | 4.5711         | 3.0464  | 4.0511  |
| 11 | C    | 3.3961         | -0.6197 | 3.7780  |
| 12 | H    | 3.0753         | -1.6542 | 3.7192  |
| 13 | C    | 5.6435         | -2.5150 | 0.1603  |
| 14 | H    | 6.7240         | -2.3389 | 0.1885  |
| 15 | H    | 5.4287         | -3.4593 | 0.6675  |
| 16 | H    | 5.3417         | -2.6083 | -0.8895 |
| 17 | C    | 5.2267         | -0.0317 | 0.1022  |
| 18 | H    | 6.3071         | 0.1477  | 0.1327  |
| 19 | H    | 4.9148         | -0.0893 | -0.9419 |
| 20 | H    | 4.7198         | 0.8209  | 0.5571  |
| 21 | C    | 1.3153         | -3.4999 | -1.5595 |
| 22 | C    | 1.6245         | -4.2667 | -2.8467 |
| 23 | C    | 0.5644         | -5.4041 | -2.9925 |
| 24 | H    | 0.7502         | -5.8916 | -3.9563 |
| 25 | H    | 0.7538         | -6.1453 | -2.2099 |
| 26 | C    | -0.8704        | -4.9374 | -2.9032 |
| 27 | C    | -1.5786        | -4.5055 | -4.0318 |
| 28 | H    | -1.1063        | -4.5376 | -5.0098 |
| 29 | C    | -2.8956        | -4.0584 | -3.9079 |
| 30 | H    | -3.4456        | -3.7478 | -4.7924 |
| 31 | C    | -1.5142        | -4.9108 | -1.6600 |
| 32 | H    | -0.9783        | -5.2579 | -0.7826 |
| 33 | C    | 3.0228         | -4.9005 | -2.7024 |
| 34 | H    | 3.0677         | -5.5612 | -1.8329 |
| 35 | H    | 3.2548         | -5.4842 | -3.5996 |
| 36 | H    | 3.7921         | -4.1278 | -2.5908 |
| 37 | C    | 1.6005         | -3.3329 | -4.0634 |
| 38 | H    | 1.8108         | -3.9116 | -4.9691 |
| 39 | H    | 0.6323         | -2.8416 | -4.1802 |
| 40 | H    | 2.3661         | -2.5577 | -3.9679 |
| 41 | O    | 2.6627         | -0.8125 | 0.1918  |
| 42 | O    | 3.0084         | -2.7042 | 1.3735  |
| 43 | O    | 1.0182         | -2.2615 | -1.6788 |
| 44 | O    | 1.3655         | -4.1352 | -0.4648 |
| 45 | Rh   | 0.9962         | -3.1396 | 1.3124  |
| 46 | C    | 0.3372         | -0.7873 | 2.8788  |
| 47 | C    | 0.0554         | -0.0223 | 4.1755  |
| 48 | C    | 1.3061         | -0.1618 | 5.1009  |
| 49 | H    | 1.3945         | -1.2109 | 5.3992  |
| 50 | H    | 1.0905         | 0.4183  | 6.0053  |
| 51 | C    | 2.6058         | 0.2952  | 4.4834  |

|     |    |         |         |         |
|-----|----|---------|---------|---------|
| 52  | C  | 3.0432  | 1.6228  | 4.5754  |
| 53  | H  | 2.4540  | 2.3453  | 5.1333  |
| 54  | C  | -1.1423 | -0.7019 | 4.8728  |
| 55  | H  | -1.3313 | -0.2013 | 5.8288  |
| 56  | H  | -0.9334 | -1.7577 | 5.0662  |
| 57  | H  | -2.0411 | -0.6141 | 4.2621  |
| 58  | C  | -0.2619 | 1.4525  | 3.9068  |
| 59  | H  | -0.4311 | 1.9579  | 4.8644  |
| 60  | H  | -1.1616 | 1.5568  | 3.3045  |
| 61  | H  | 0.5626  | 1.9543  | 3.3977  |
| 62  | O  | 0.2941  | -0.1472 | 1.7725  |
| 63  | O  | 0.6138  | -2.0225 | 2.9897  |
| 64  | C  | -1.7709 | -2.6805 | 0.5865  |
| 65  | C  | -3.2692 | -2.9953 | 0.5797  |
| 66  | C  | -3.4463 | -4.3745 | -0.1364 |
| 67  | H  | -4.5244 | -4.5625 | -0.1927 |
| 68  | H  | -3.0105 | -5.1507 | 0.5002  |
| 69  | C  | -2.8259 | -4.4448 | -1.5124 |
| 70  | C  | -3.5155 | -4.0244 | -2.6576 |
| 71  | H  | -4.5426 | -3.6814 | -2.5714 |
| 72  | C  | -3.7423 | -3.1223 | 2.0425  |
| 73  | H  | -3.1475 | -3.8584 | 2.5896  |
| 74  | H  | -4.7904 | -3.4415 | 2.0527  |
| 75  | H  | -3.6785 | -2.1552 | 2.5466  |
| 76  | C  | -4.0829 | -1.9106 | -0.1296 |
| 77  | H  | -5.1421 | -2.1917 | -0.1050 |
| 78  | H  | -3.7835 | -1.8011 | -1.1704 |
| 79  | H  | -3.9742 | -0.9470 | 0.3644  |
| 80  | O  | -1.3572 | -1.6530 | -0.0526 |
| 81  | O  | -1.0180 | -3.4893 | 1.2126  |
| 82  | Rh | 0.6386  | -1.1285 | -0.0097 |
| 83  | C  | 0.4495  | 0.4180  | -1.1098 |
| 84  | C  | 1.0320  | 0.5818  | -2.4763 |
| 85  | O  | 2.3518  | 0.4844  | -2.5198 |
| 86  | C  | 2.9439  | 0.4909  | -3.8578 |
| 87  | O  | 0.2977  | 0.6914  | -3.4440 |
| 88  | H  | 2.6619  | 1.4249  | -4.3501 |
| 89  | H  | 2.5070  | -0.3384 | -4.4175 |
| 90  | C  | 4.4403  | 0.3553  | -3.6934 |
| 91  | H  | 4.6968  | -0.5904 | -3.2069 |
| 92  | H  | 4.9119  | 0.3748  | -4.6810 |
| 93  | H  | 4.8467  | 1.1802  | -3.1004 |
| 94  | C  | -3.7931 | 2.0031  | -1.7614 |
| 95  | C  | -2.6064 | 1.2698  | -1.7835 |
| 96  | C  | -2.4536 | 0.1040  | -2.5110 |
| 97  | C  | -3.5252 | -0.3216 | -3.3022 |
| 98  | C  | -4.7190 | 0.3980  | -3.3291 |
| 99  | C  | -4.8576 | 1.5428  | -2.5500 |
| 100 | I  | -0.9448 | 2.0240  | -0.5787 |
| 101 | C  | -3.9328 | 3.1936  | -0.8898 |
| 102 | O  | -5.1781 | 3.6267  | -0.7720 |
| 103 | C  | -5.4039 | 4.6361  | 0.2408  |
| 104 | O  | -2.9734 | 3.7179  | -0.3304 |

|     |   |         |         |         |
|-----|---|---------|---------|---------|
| 105 | H | -1.5498 | -0.4830 | -2.4736 |
| 106 | H | -3.4157 | -1.2379 | -3.8724 |
| 107 | H | -5.5478 | 0.0582  | -3.9410 |
| 108 | H | -5.7885 | 2.0968  | -2.5353 |
| 109 | H | -4.7831 | 5.5127  | 0.0485  |
| 110 | H | -5.1742 | 4.2062  | 1.2168  |
| 111 | H | -6.4609 | 4.8839  | 0.1616  |
| 112 | C | 4.2409  | 5.9356  | -1.5152 |
| 113 | O | 3.6251  | 6.8641  | -1.0334 |
| 114 | O | 5.2070  | 6.1014  | -2.4441 |
| 115 | H | 5.2902  | 7.0621  | -2.6020 |
| 116 | C | 4.0636  | 4.4800  | -1.1475 |
| 117 | H | 4.2547  | 3.8594  | -2.0282 |
| 118 | H | 4.8464  | 4.2272  | -0.4203 |
| 119 | C | 2.6807  | 4.1961  | -0.5371 |
| 120 | C | 2.6123  | 2.7626  | -0.0587 |
| 121 | C | 2.2025  | 2.3959  | 1.1607  |
| 122 | H | 1.8897  | 3.1328  | 1.8965  |
| 123 | H | 2.1825  | 1.3583  | 1.4667  |
| 124 | H | 2.9321  | 1.9979  | -0.7632 |
| 125 | C | 1.5448  | 4.4807  | -1.5103 |
| 126 | C | 0.4789  | 5.3016  | -1.1245 |
| 127 | C | -0.6158 | 5.4942  | -1.9687 |
| 128 | C | -0.6606 | 4.8637  | -3.2141 |
| 129 | C | 0.4056  | 4.0560  | -3.6161 |
| 130 | C | 1.5012  | 3.8731  | -2.7713 |
| 131 | H | 2.3248  | 3.2443  | -3.0946 |
| 132 | H | 0.3825  | 3.5609  | -4.5820 |
| 133 | H | -1.5157 | 5.0052  | -3.8686 |
| 134 | H | -1.4381 | 6.1263  | -1.6480 |
| 135 | H | 0.5043  | 5.7843  | -0.1515 |
| 136 | H | 2.5527  | 4.8572  | 0.3254  |
| 137 | F | -3.0354 | 2.5051  | 2.2606  |
| 138 | P | -4.0702 | 1.2600  | 2.5103  |
| 139 | F | -2.8590 | 0.1992  | 2.1744  |
| 140 | F | -3.6664 | 1.2351  | 4.0905  |
| 141 | F | -5.2738 | 2.3257  | 2.8183  |
| 142 | F | -4.4705 | 1.2843  | 0.9145  |
| 143 | F | -5.0946 | 0.0104  | 2.7386  |

|    |      | <b>D<sub>3</sub></b> |         |         |
|----|------|----------------------|---------|---------|
|    | Atom | X                    | Y       | Z       |
| 1  | C    | -1.5139              | -0.9405 | 2.1846  |
| 2  | C    | -2.6015              | -0.6950 | 3.2331  |
| 3  | C    | -3.7599              | -1.7101 | 2.9561  |
| 4  | H    | -3.4337              | -2.6967 | 3.3000  |
| 5  | H    | -4.6065              | -1.4095 | 3.5837  |
| 6  | C    | -4.1728              | -1.8058 | 1.5064  |
| 7  | C    | -5.1015              | -0.9299 | 0.9302  |
| 8  | H    | -5.5927              | -0.1803 | 1.5441  |
| 9  | C    | -5.4233              | -1.0375 | -0.4248 |
| 10 | H    | -6.1667              | -0.3721 | -0.8559 |
| 11 | C    | -3.5879              | -2.7847 | 0.6953  |
| 12 | H    | -2.8747              | -3.4750 | 1.1368  |
| 13 | C    | -2.0234              | -0.9638 | 4.6343  |
| 14 | H    | -2.8099              | -0.8328 | 5.3851  |
| 15 | H    | -1.6316              | -1.9807 | 4.7111  |
| 16 | H    | -1.2131              | -0.2630 | 4.8640  |
| 17 | C    | -3.1171              | 0.7472  | 3.1516  |
| 18 | H    | -3.8856              | 0.9036  | 3.9158  |
| 19 | H    | -2.3094              | 1.4649  | 3.3269  |
| 20 | H    | -3.5514              | 0.9599  | 2.1744  |
| 21 | C    | 1.9309               | 0.1384  | 2.0889  |
| 22 | C    | 2.7746               | 0.9401  | 3.0830  |
| 23 | C    | 4.2335               | 0.3866  | 3.0532  |
| 24 | H    | 4.8164               | 0.9863  | 3.7611  |
| 25 | H    | 4.2148               | -0.6396 | 3.4322  |
| 26 | C    | 4.8828               | 0.4114  | 1.6884  |
| 27 | C    | 5.6557               | 1.4990  | 1.2624  |
| 28 | H    | 5.8278               | 2.3337  | 1.9366  |
| 29 | C    | 6.2156               | 1.5090  | -0.0167 |
| 30 | H    | 6.8247               | 2.3511  | -0.3331 |
| 31 | C    | 4.6987               | -0.6621 | 0.8080  |
| 32 | H    | 4.1273               | -1.5218 | 1.1393  |
| 33 | C    | 2.1806               | 0.7042  | 4.4881  |
| 34 | H    | 2.1865               | -0.3584 | 4.7448  |
| 35 | H    | 2.7719               | 1.2485  | 5.2321  |
| 36 | H    | 1.1485               | 1.0693  | 4.5415  |
| 37 | C    | 2.7486               | 2.4370  | 2.7539  |
| 38 | H    | 3.3732               | 2.9777  | 3.4729  |
| 39 | H    | 3.1247               | 2.6365  | 1.7490  |
| 40 | H    | 1.7306               | 2.8304  | 2.8220  |
| 41 | O    | -1.4109              | -0.0804 | 1.2439  |
| 42 | O    | -0.8011              | -1.9837 | 2.2990  |
| 43 | O    | 1.2977               | 0.7844  | 1.1870  |
| 44 | O    | 1.9065               | -1.1224 | 2.2380  |
| 45 | Rh   | 0.7627               | -2.2865 | 0.9869  |
| 46 | C    | -1.0515              | -2.6967 | -1.2334 |
| 47 | C    | -1.9100              | -3.4699 | -2.2367 |
| 48 | C    | -3.1908              | -3.9623 | -1.4852 |
| 49 | H    | -2.9004              | -4.7876 | -0.8274 |
| 50 | H    | -3.8658              | -4.3735 | -2.2444 |
| 51 | C    | -3.8907              | -2.9034 | -0.6652 |

|     |    |         |         |         |
|-----|----|---------|---------|---------|
| 52  | C  | -4.8229 | -2.0164 | -1.2201 |
| 53  | H  | -5.0977 | -2.1065 | -2.2671 |
| 54  | C  | -1.1208 | -4.6938 | -2.7359 |
| 55  | H  | -1.7463 | -5.2799 | -3.4174 |
| 56  | H  | -0.8157 | -5.3331 | -1.9040 |
| 57  | H  | -0.2223 | -4.3826 | -3.2809 |
| 58  | C  | -2.2910 | -2.5742 | -3.4248 |
| 59  | H  | -2.8987 | -3.1502 | -4.1308 |
| 60  | H  | -1.3972 | -2.2225 | -3.9502 |
| 61  | H  | -2.8618 | -1.6998 | -3.1060 |
| 62  | O  | -1.0309 | -1.4265 | -1.3673 |
| 63  | O  | -0.4370 | -3.3397 | -0.3304 |
| 64  | C  | 2.4562  | -1.5220 | -1.2579 |
| 65  | C  | 3.6219  | -1.6710 | -2.2383 |
| 66  | C  | 4.9442  | -1.8117 | -1.4216 |
| 67  | H  | 5.7568  | -1.9200 | -2.1488 |
| 68  | H  | 4.8922  | -2.7428 | -0.8492 |
| 69  | C  | 5.2277  | -0.6568 | -0.4881 |
| 70  | C  | 5.9957  | 0.4436  | -0.8914 |
| 71  | H  | 6.4331  | 0.4591  | -1.8859 |
| 72  | C  | 3.3887  | -2.9696 | -3.0393 |
| 73  | H  | 3.3326  | -3.8360 | -2.3750 |
| 74  | H  | 4.2146  | -3.1193 | -3.7427 |
| 75  | H  | 2.4577  | -2.9118 | -3.6147 |
| 76  | C  | 3.6966  | -0.4737 | -3.1944 |
| 77  | H  | 4.5296  | -0.6176 | -3.8908 |
| 78  | H  | 3.8622  | 0.4595  | -2.6513 |
| 79  | H  | 2.7752  | -0.3759 | -3.7754 |
| 80  | O  | 1.7066  | -0.4938 | -1.3894 |
| 81  | O  | 2.2983  | -2.4302 | -0.3873 |
| 82  | Rh | 0.0949  | -0.2382 | -0.1363 |
| 83  | C  | -0.5942 | 1.2464  | -1.2104 |
| 84  | C  | 0.3407  | 2.0822  | -2.0287 |
| 85  | O  | 1.3629  | 2.4948  | -1.3945 |
| 86  | C  | 2.4218  | 3.2619  | -2.1027 |
| 87  | O  | 0.2707  | 2.2548  | -3.3041 |
| 88  | H  | 1.9257  | 4.1175  | -2.5634 |
| 89  | H  | 2.8153  | 2.5993  | -2.8748 |
| 90  | C  | 3.4417  | 3.6422  | -1.0610 |
| 91  | H  | 3.8935  | 2.7567  | -0.6094 |
| 92  | H  | 4.2323  | 4.2220  | -1.5476 |
| 93  | H  | 2.9896  | 4.2588  | -0.2796 |
| 94  | C  | -2.6627 | 1.9599  | -2.3846 |
| 95  | O  | -1.8900 | 1.2223  | -1.4658 |
| 96  | O  | -2.2710 | 2.1608  | -3.5099 |
| 97  | H  | -0.6582 | 2.0494  | -3.6434 |
| 98  | C  | -3.9440 | 2.3678  | -1.7452 |
| 99  | H  | -4.4306 | 3.0862  | -2.4079 |
| 100 | H  | -4.5876 | 1.4830  | -1.6649 |
| 101 | C  | -3.6902 | 2.9399  | -0.3154 |
| 102 | C  | -4.9169 | 3.6855  | 0.1520  |
| 103 | C  | -5.6685 | 3.3087  | 1.1856  |
| 104 | H  | -6.5415 | 3.8787  | 1.4900  |

|     |   |         |        |         |
|-----|---|---------|--------|---------|
| 105 | H | -5.4354 | 2.4222 | 1.7697  |
| 106 | H | -5.1705 | 4.5829 | -0.4115 |
| 107 | C | -2.4388 | 3.8100 | -0.2755 |
| 108 | C | -1.4139 | 3.5146 | 0.6378  |
| 109 | C | -0.2475 | 4.2826 | 0.6699  |
| 110 | C | -0.0843 | 5.3479 | -0.2177 |
| 111 | C | -1.0937 | 5.6416 | -1.1379 |
| 112 | C | -2.2641 | 4.8784 | -1.1655 |
| 113 | H | -3.0405 | 5.1210 | -1.8858 |
| 114 | H | -0.9742 | 6.4664 | -1.8338 |
| 115 | H | 0.8226  | 5.9450 | -0.1950 |
| 116 | H | 0.5382  | 4.0326 | 1.3745  |
| 117 | H | -1.5295 | 2.6754 | 1.3172  |
| 118 | H | -3.5253 | 2.0871 | 0.3464  |

|    |      | C <sub>1A</sub> |         |         |
|----|------|-----------------|---------|---------|
|    | Atom | X               | Y       | Z       |
| 1  | C    | -3.6927         | -0.2568 | -1.3291 |
| 2  | C    | -4.5708         | -0.7406 | -2.4844 |
| 3  | C    | -5.4610         | -1.9070 | -1.9445 |
| 4  | H    | -6.2187         | -1.4761 | -1.2827 |
| 5  | H    | -5.9851         | -2.3336 | -2.8072 |
| 6  | C    | -4.6990         | -2.9764 | -1.1978 |
| 7  | C    | -4.0740         | -4.0438 | -1.8563 |
| 8  | H    | -4.1752         | -4.1476 | -2.9330 |
| 9  | C    | -3.3463         | -4.9894 | -1.1316 |
| 10 | H    | -2.8793         | -5.8233 | -1.6482 |
| 11 | C    | -4.5811         | -2.8901 | 0.1939  |
| 12 | H    | -5.0734         | -2.0735 | 0.7138  |
| 13 | C    | -5.4816         | 0.4177  | -2.9338 |
| 14 | H    | -6.1479         | 0.0699  | -3.7301 |
| 15 | H    | -6.0898         | 0.7860  | -2.1041 |
| 16 | H    | -4.8889         | 1.2517  | -3.3264 |
| 17 | C    | -3.7069         | -1.2127 | -3.6619 |
| 18 | H    | -4.3571         | -1.5516 | -4.4754 |
| 19 | H    | -3.0807         | -0.3978 | -4.0380 |
| 20 | H    | -3.0515         | -2.0360 | -3.3737 |
| 21 | C    | -2.0007         | 2.8962  | -0.7560 |
| 22 | C    | -1.9306         | 4.1793  | -1.5833 |
| 23 | C    | -1.5685         | 5.3492  | -0.6122 |
| 24 | H    | -1.4208         | 6.2409  | -1.2317 |
| 25 | H    | -2.4334         | 5.5377  | 0.0313  |
| 26 | C    | -0.3532         | 5.0885  | 0.2462  |
| 27 | C    | 0.9460          | 5.3561  | -0.2035 |
| 28 | H    | 1.0980          | 5.8047  | -1.1810 |
| 29 | C    | 2.0455          | 5.0666  | 0.6058  |
| 30 | H    | 3.0470          | 5.2904  | 0.2530  |
| 31 | C    | -0.5166         | 4.5344  | 1.5212  |
| 32 | H    | -1.5210         | 4.3388  | 1.8847  |
| 33 | C    | -3.3222         | 4.4425  | -2.1910 |
| 34 | H    | -4.0861         | 4.5182  | -1.4133 |
| 35 | H    | -3.3011         | 5.3807  | -2.7553 |
| 36 | H    | -3.6055         | 3.6382  | -2.8793 |
| 37 | C    | -0.8863         | 4.0565  | -2.6970 |
| 38 | H    | -0.8632         | 4.9858  | -3.2764 |
| 39 | H    | 0.1095          | 3.8728  | -2.2951 |
| 40 | H    | -1.1310         | 3.2340  | -3.3755 |
| 41 | O    | -2.4388         | -0.4931 | -1.4217 |
| 42 | O    | -4.2546         | 0.3314  | -0.3558 |
| 43 | O    | -1.1273         | 1.9902  | -0.9904 |
| 44 | O    | -2.9141         | 2.8053  | 0.1187  |
| 45 | Rh   | -3.1188         | 1.0755  | 1.2043  |
| 46 | C    | -2.3877         | -1.5604 | 2.0440  |
| 47 | C    | -2.4342         | -2.8494 | 2.8669  |
| 48 | C    | -3.7096         | -3.6408 | 2.4296  |
| 49 | H    | -4.5871         | -3.1092 | 2.8111  |
| 50 | H    | -3.6699         | -4.6121 | 2.9356  |
| 51 | C    | -3.8459         | -3.8218 | 0.9358  |



|     |    |         |         |         |
|-----|----|---------|---------|---------|
| 52  | C  | -3.2312 | -4.8806 | 0.2555  |
| 53  | H  | -2.6759 | -5.6299 | 0.8126  |
| 54  | C  | -2.5570 | -2.4771 | 4.3566  |
| 55  | H  | -2.6333 | -3.3910 | 4.9550  |
| 56  | H  | -3.4425 | -1.8635 | 4.5398  |
| 57  | H  | -1.6741 | -1.9223 | 4.6937  |
| 58  | C  | -1.1681 | -3.6844 | 2.6381  |
| 59  | H  | -1.2156 | -4.5896 | 3.2526  |
| 60  | H  | -0.2737 | -3.1211 | 2.9183  |
| 61  | H  | -1.0724 | -3.9780 | 1.5918  |
| 62  | O  | -1.4599 | -1.4710 | 1.1729  |
| 63  | O  | -3.2689 | -0.6748 | 2.2622  |
| 64  | C  | -0.5892 | 1.5531  | 2.5465  |
| 65  | C  | 0.3478  | 2.0147  | 3.6642  |
| 66  | C  | 0.3301  | 3.5776  | 3.6856  |
| 67  | H  | 1.0897  | 3.8942  | 4.4092  |
| 68  | H  | -0.6423 | 3.9013  | 4.0701  |
| 69  | C  | 0.5739  | 4.2221  | 2.3408  |
| 70  | C  | 1.8639  | 4.4988  | 1.8684  |
| 71  | H  | 2.7248  | 4.2899  | 2.4976  |
| 72  | C  | -0.1956 | 1.4865  | 5.0059  |
| 73  | H  | -1.2172 | 1.8321  | 5.1821  |
| 74  | H  | 0.4413  | 1.8416  | 5.8228  |
| 75  | H  | -0.1919 | 0.3907  | 5.0235  |
| 76  | C  | 1.7728  | 1.4909  | 3.4353  |
| 77  | H  | 2.4074  | 1.8060  | 4.2707  |
| 78  | H  | 2.2043  | 1.8775  | 2.5103  |
| 79  | H  | 1.7884  | 0.3983  | 3.3819  |
| 80  | O  | -0.0406 | 0.9958  | 1.5349  |
| 81  | O  | -1.8344 | 1.7552  | 2.6773  |
| 82  | Rh | -1.1722 | 0.2135  | 0.0219  |
| 83  | C  | 0.3373  | -0.6869 | -0.7137 |
| 84  | C  | 0.2438  | -2.0401 | -1.3348 |
| 85  | O  | 0.1260  | -1.9321 | -2.6465 |
| 86  | C  | -0.1416 | -3.1652 | -3.3984 |
| 87  | O  | 0.1991  | -3.0801 | -0.6985 |
| 88  | H  | -1.0685 | -3.5890 | -3.0044 |
| 89  | H  | 0.6783  | -3.8600 | -3.2037 |
| 90  | C  | -0.2445 | -2.7756 | -4.8553 |
| 91  | H  | 0.6907  | -2.3296 | -5.2076 |
| 92  | H  | -0.4472 | -3.6704 | -5.4520 |
| 93  | H  | -1.0590 | -2.0625 | -5.0118 |
| 94  | C  | 3.3415  | 2.4394  | -1.5464 |
| 95  | C  | 2.4414  | 1.3760  | -1.6717 |
| 96  | C  | 1.6279  | 1.2162  | -2.7836 |
| 97  | C  | 1.7050  | 2.1656  | -3.8065 |
| 98  | C  | 2.5772  | 3.2492  | -3.7041 |
| 99  | C  | 3.3883  | 3.3860  | -2.5813 |
| 100 | I  | 2.3748  | -0.1167 | -0.1172 |
| 101 | C  | 4.2641  | 2.5226  | -0.3886 |
| 102 | O  | 4.9522  | 3.6560  | -0.3316 |
| 103 | C  | 5.8856  | 3.7853  | 0.7664  |
| 104 | O  | 4.3915  | 1.6138  | 0.4289  |

|     |   |        |         |         |
|-----|---|--------|---------|---------|
| 105 | H | 0.9492 | 0.3768  | -2.8739 |
| 106 | H | 1.0720 | 2.0503  | -4.6802 |
| 107 | H | 2.6301 | 3.9837  | -4.5001 |
| 108 | H | 4.0803 | 4.2150  | -2.4963 |
| 109 | H | 6.6392 | 2.9978  | 0.7081  |
| 110 | H | 5.3515 | 3.7203  | 1.7159  |
| 111 | H | 6.3369 | 4.7671  | 0.6399  |
| 112 | C | 2.6045 | -3.2374 | 1.6810  |
| 113 | O | 2.1841 | -2.0990 | 1.8661  |
| 114 | O | 1.8640 | -4.1926 | 1.1215  |
| 115 | H | 1.0511 | -3.7746 | 0.7501  |
| 116 | C | 4.0053 | -3.6909 | 1.9985  |
| 117 | H | 4.5450 | -2.8499 | 2.4395  |
| 118 | H | 3.9655 | -4.5035 | 2.7321  |
| 119 | C | 4.7234 | -4.2120 | 0.7196  |
| 120 | C | 6.1230 | -4.6599 | 1.0654  |
| 121 | C | 6.5568 | -5.9134 | 0.9363  |
| 122 | H | 7.5719 | -6.1953 | 1.2016  |
| 123 | H | 5.9119 | -6.7041 | 0.5586  |
| 124 | H | 6.7955 | -3.8943 | 1.4509  |
| 125 | C | 4.7103 | -3.1765 | -0.4013 |
| 126 | C | 3.8767 | -3.3624 | -1.5132 |
| 127 | C | 3.8771 | -2.4506 | -2.5727 |
| 128 | C | 4.7152 | -1.3346 | -2.5363 |
| 129 | C | 5.5351 | -1.1275 | -1.4237 |
| 130 | C | 5.5269 | -2.0368 | -0.3633 |
| 131 | H | 6.1738 | -1.8588 | 0.4908  |
| 132 | H | 6.1819 | -0.2566 | -1.3782 |
| 133 | H | 4.7241 | -0.6281 | -3.3609 |
| 134 | H | 3.2304 | -2.6195 | -3.4290 |
| 135 | H | 3.2310 | -4.2351 | -1.5528 |
| 136 | H | 4.1627 | -5.0842 | 0.3713  |

|    |      | TS2 <sub>A</sub> |         |         |
|----|------|------------------|---------|---------|
|    | Atom | X                | Y       | Z       |
| 1  | C    | -3.4967          | -1.5767 | 0.6964  |
| 2  | C    | -4.5229          | -2.0637 | 1.7233  |
| 3  | C    | -5.8884          | -1.3753 | 1.4052  |
| 4  | H    | -6.2668          | -1.7900 | 0.4657  |
| 5  | H    | -6.5867          | -1.6684 | 2.1974  |
| 6  | C    | -5.8090          | 0.1292  | 1.2953  |
| 7  | C    | -5.9398          | 0.9615  | 2.4144  |
| 8  | H    | -6.1563          | 0.5271  | 3.3865  |
| 9  | C    | -5.8116          | 2.3454  | 2.2828  |
| 10 | H    | -5.9290          | 2.9842  | 3.1537  |
| 11 | C    | -5.5612          | 0.7184  | 0.0504  |
| 12 | H    | -5.4749          | 0.0830  | -0.8252 |
| 13 | C    | -4.6801          | -3.5886 | 1.5613  |
| 14 | H    | -5.4360          | -3.9557 | 2.2636  |
| 15 | H    | -4.9898          | -3.8470 | 0.5457  |
| 16 | H    | -3.7369          | -4.1032 | 1.7777  |
| 17 | C    | -4.0659          | -1.7370 | 3.1506  |
| 18 | H    | -4.8114          | -2.1035 | 3.8642  |
| 19 | H    | -3.1101          | -2.2205 | 3.3722  |
| 20 | H    | -3.9452          | -0.6618 | 3.2966  |
| 21 | C    | -0.5357          | -3.1814 | -0.7034 |
| 22 | C    | 0.0861           | -4.5614 | -0.4753 |
| 23 | C    | 0.9053           | -4.9313 | -1.7522 |
| 24 | H    | 1.4107           | -5.8808 | -1.5422 |
| 25 | H    | 0.2005           | -5.1096 | -2.5700 |
| 26 | C    | 1.9049           | -3.8801 | -2.1724 |
| 27 | C    | 3.2028           | -3.8394 | -1.6471 |
| 28 | H    | 3.5269           | -4.6027 | -0.9453 |
| 29 | C    | 4.0889           | -2.8360 | -2.0405 |
| 30 | H    | 5.1011           | -2.8357 | -1.6505 |
| 31 | C    | 1.5275           | -2.8976 | -3.0947 |
| 32 | H    | 0.5293           | -2.9317 | -3.5197 |
| 33 | C    | -1.0577          | -5.5808 | -0.3027 |
| 34 | H    | -1.7175          | -5.5859 | -1.1737 |
| 35 | H    | -0.6361          | -6.5835 | -0.1750 |
| 36 | H    | -1.6569          | -5.3487 | 0.5850  |
| 37 | C    | 0.9804           | -4.5695 | 0.7651  |
| 38 | H    | 1.4075           | -5.5689 | 0.9015  |
| 39 | H    | 1.7975           | -3.8533 | 0.6780  |
| 40 | H    | 0.4060           | -4.3181 | 1.6600  |
| 41 | O    | -2.5047          | -0.9034 | 1.1406  |
| 42 | O    | -3.6963          | -1.8711 | -0.5214 |
| 43 | O    | -0.1737          | -2.2215 | 0.0618  |
| 44 | O    | -1.3736          | -3.0807 | -1.6486 |
| 45 | Rh   | -2.3273          | -1.2952 | -1.9610 |
| 46 | C    | -2.8842          | 1.4902  | -1.4821 |
| 47 | C    | -3.5605          | 2.8403  | -1.7378 |
| 48 | C    | -5.0879          | 2.6752  | -1.4570 |
| 49 | H    | -5.5086          | 2.0295  | -2.2339 |
| 50 | H    | -5.5405          | 3.6663  | -1.5747 |
| 51 | C    | -5.4134          | 2.1021  | -0.0980 |

|     |    |         |         |         |
|-----|----|---------|---------|---------|
| 52  | C  | -5.5461 | 2.9140  | 1.0358  |
| 53  | H  | -5.4576 | 3.9925  | 0.9396  |
| 54  | C  | -3.3650 | 3.1975  | -3.2255 |
| 55  | H  | -3.8652 | 4.1476  | -3.4413 |
| 56  | H  | -3.7835 | 2.4251  | -3.8753 |
| 57  | H  | -2.3012 | 3.3121  | -3.4634 |
| 58  | C  | -2.9580 | 3.9409  | -0.8605 |
| 59  | H  | -3.4909 | 4.8808  | -1.0400 |
| 60  | H  | -1.9068 | 4.0964  | -1.1127 |
| 61  | H  | -3.0208 | 3.7005  | 0.2016  |
| 62  | O  | -2.0072 | 1.4243  | -0.5553 |
| 63  | O  | -3.2432 | 0.5190  | -2.2144 |
| 64  | C  | 0.1808  | -0.0689 | -2.7859 |
| 65  | C  | 1.2619  | 0.4330  | -3.7461 |
| 66  | C  | 1.9080  | -0.8074 | -4.4409 |
| 67  | H  | 2.7349  | -0.4352 | -5.0563 |
| 68  | H  | 1.1665  | -1.2422 | -5.1188 |
| 69  | C  | 2.3955  | -1.8705 | -3.4837 |
| 70  | C  | 3.6894  | -1.8525 | -2.9473 |
| 71  | H  | 4.3903  | -1.0801 | -3.2518 |
| 72  | C  | 0.5877  | 1.3162  | -4.8137 |
| 73  | H  | -0.1901 | 0.7648  | -5.3481 |
| 74  | H  | 1.3372  | 1.6556  | -5.5365 |
| 75  | H  | 0.1320  | 2.2013  | -4.3551 |
| 76  | C  | 2.3218  | 1.2452  | -2.9868 |
| 77  | H  | 3.0479  | 1.6494  | -3.7005 |
| 78  | H  | 2.8563  | 0.6312  | -2.2593 |
| 79  | H  | 1.8630  | 2.0751  | -2.4430 |
| 80  | O  | 0.3984  | 0.1286  | -1.5442 |
| 81  | O  | -0.8453 | -0.6424 | -3.2629 |
| 82  | Rh | -1.0072 | -0.3368 | -0.1478 |
| 83  | C  | 0.0331  | 0.4441  | 1.2612  |
| 84  | C  | -0.5023 | 0.9171  | 2.5788  |
| 85  | O  | -0.5099 | -0.0816 | 3.4422  |
| 86  | C  | -1.1507 | 0.1426  | 4.7456  |
| 87  | O  | -0.9741 | 2.0231  | 2.7983  |
| 88  | H  | -2.2032 | 0.3585  | 4.5543  |
| 89  | H  | -0.6806 | 1.0173  | 5.1989  |
| 90  | C  | -0.9479 | -1.1183 | 5.5549  |
| 91  | H  | 0.1159  | -1.3119 | 5.7222  |
| 92  | H  | -1.4334 | -0.9988 | 6.5284  |
| 93  | H  | -1.3924 | -1.9819 | 5.0515  |
| 94  | C  | 4.0252  | -2.0192 | 1.7245  |
| 95  | C  | 2.7796  | -1.4392 | 2.0038  |
| 96  | C  | 1.8804  | -2.0121 | 2.8866  |
| 97  | C  | 2.2323  | -3.2083 | 3.5204  |
| 98  | C  | 3.4544  | -3.8213 | 3.2528  |
| 99  | C  | 4.3415  | -3.2311 | 2.3578  |
| 100 | I  | 2.2799  | 0.4506  | 1.0472  |
| 101 | C  | 5.0080  | -1.3443 | 0.8464  |
| 102 | O  | 6.1123  | -2.0500 | 0.6286  |
| 103 | C  | 7.1373  | -1.4007 | -0.1594 |
| 104 | O  | 4.8255  | -0.2216 | 0.3857  |

|     |   |         |         |         |
|-----|---|---------|---------|---------|
| 105 | H | 0.9214  | -1.5602 | 3.0874  |
| 106 | H | 1.5307  | -3.6573 | 4.2160  |
| 107 | H | 3.7196  | -4.7526 | 3.7410  |
| 108 | H | 5.3013  | -3.6869 | 2.1476  |
| 109 | H | 7.4622  | -0.4851 | 0.3380  |
| 110 | H | 6.7524  | -1.1653 | -1.1533 |
| 111 | H | 7.9494  | -2.1224 | -0.2181 |
| 112 | C | 0.3326  | 3.6987  | 0.3405  |
| 113 | O | 0.6364  | 2.5090  | 0.2096  |
| 114 | O | -0.4432 | 4.1493  | 1.3044  |
| 115 | H | -0.7220 | 3.3715  | 1.8648  |
| 116 | C | 0.8746  | 4.7680  | -0.5679 |
| 117 | H | 1.2107  | 4.2985  | -1.4948 |
| 118 | H | 0.0853  | 5.4887  | -0.7979 |
| 119 | C | 2.0523  | 5.5163  | 0.1252  |
| 120 | C | 2.5959  | 6.5742  | -0.8052 |
| 121 | C | 2.5375  | 7.8834  | -0.5638 |
| 122 | H | 2.9431  | 8.6100  | -1.2623 |
| 123 | H | 2.0834  | 8.2764  | 0.3434  |
| 124 | H | 3.0586  | 6.2107  | -1.7225 |
| 125 | C | 3.1370  | 4.5495  | 0.5761  |
| 126 | C | 3.4633  | 4.4433  | 1.9324  |
| 127 | C | 4.4623  | 3.5648  | 2.3616  |
| 128 | C | 5.1457  | 2.7782  | 1.4343  |
| 129 | C | 4.8230  | 2.8725  | 0.0767  |
| 130 | C | 3.8264  | 3.7495  | -0.3474 |
| 131 | H | 3.5835  | 3.8056  | -1.4045 |
| 132 | H | 5.3392  | 2.2495  | -0.6458 |
| 133 | H | 5.9168  | 2.0877  | 1.7608  |
| 134 | H | 4.7060  | 3.5006  | 3.4183  |
| 135 | H | 2.9362  | 5.0585  | 2.6570  |
| 136 | H | 1.6447  | 6.0130  | 1.0119  |

|    |      | <b>D<sub>1</sub></b> |         |         |
|----|------|----------------------|---------|---------|
|    | Atom | X                    | Y       | Z       |
| 1  | C    | 3.1032               | -2.0895 | -0.8880 |
| 2  | C    | 4.0664               | -2.6402 | -1.9450 |
| 3  | C    | 5.5241               | -2.3500 | -1.4670 |
| 4  | H    | 5.7274               | -2.9803 | -0.5960 |
| 5  | H    | 6.1956               | -2.6749 | -2.2699 |
| 6  | C    | 5.7837               | -0.9057 | -1.1088 |
| 7  | C    | 6.1628               | 0.0426  | -2.0679 |
| 8  | H    | 6.3225               | -0.2657 | -3.0974 |
| 9  | C    | 6.3569               | 1.3761  | -1.7023 |
| 10 | H    | 6.6667               | 2.1014  | -2.4496 |
| 11 | C    | 5.6147               | -0.4848 | 0.2147  |
| 12 | H    | 5.3317               | -1.2143 | 0.9665  |
| 13 | C    | 3.8655               | -4.1664 | -2.0320 |
| 14 | H    | 4.5621               | -4.5880 | -2.7646 |
| 15 | H    | 4.0439               | -4.6422 | -1.0644 |
| 16 | H    | 2.8460               | -4.4088 | -2.3537 |
| 17 | C    | 3.8088               | -2.0070 | -3.3173 |
| 18 | H    | 4.5511               | -2.3755 | -4.0334 |
| 19 | H    | 2.8189               | -2.2852 | -3.6866 |
| 20 | H    | 3.8673               | -0.9174 | -3.2818 |
| 21 | C    | -0.2926              | -3.0171 | 0.1364  |
| 22 | C    | -1.2548              | -4.1108 | -0.3360 |
| 23 | C    | -2.0348              | -4.6459 | 0.9039  |
| 24 | H    | -2.7141              | -5.4268 | 0.5435  |
| 25 | H    | -1.3179              | -5.1210 | 1.5802  |
| 26 | C    | -2.8092              | -3.5814 | 1.6457  |
| 27 | C    | -4.1464              | -3.3016 | 1.3387  |
| 28 | H    | -4.6581              | -3.8845 | 0.5775  |
| 29 | C    | -4.8293              | -2.2922 | 2.0179  |
| 30 | H    | -5.8723              | -2.1053 | 1.7876  |
| 31 | C    | -2.1823              | -2.8285 | 2.6460  |
| 32 | H    | -1.1557              | -3.0556 | 2.9094  |
| 33 | C    | -0.4031              | -5.2544 | -0.9256 |
| 34 | H    | 0.2953               | -5.6487 | -0.1828 |
| 35 | H    | -1.0581              | -6.0665 | -1.2587 |
| 36 | H    | 0.1724               | -4.9063 | -1.7912 |
| 37 | C    | -2.2221              | -3.5806 | -1.3975 |
| 38 | H    | -2.8883              | -4.3876 | -1.7214 |
| 39 | H    | -2.8341              | -2.7636 | -1.0130 |
| 40 | H    | -1.6800              | -3.2119 | -2.2697 |
| 41 | O    | 2.2979               | -1.1642 | -1.2447 |
| 42 | O    | 3.1757               | -2.5887 | 0.2763  |
| 43 | O    | -0.3743              | -1.8679 | -0.4158 |
| 44 | O    | 0.5337               | -3.3348 | 1.0459  |
| 45 | Rh   | 1.8778               | -1.9392 | 1.7451  |
| 46 | C    | 3.1079               | 0.6971  | 1.7725  |
| 47 | C    | 4.0817               | 1.7545  | 2.3060  |
| 48 | C    | 5.5339               | 1.2490  | 2.0309  |
| 49 | H    | 5.7238               | 0.3922  | 2.6841  |
| 50 | H    | 6.2150               | 2.0514  | 2.3367  |
| 51 | C    | 5.7903               | 0.8496  | 0.5972  |

|     |    |         |         |         |
|-----|----|---------|---------|---------|
| 52  | C  | 6.1706  | 1.7800  | -0.3788 |
| 53  | H  | 6.3372  | 2.8169  | -0.1003 |
| 54  | C  | 3.8772  | 1.8724  | 3.8299  |
| 55  | H  | 4.5834  | 2.6028  | 4.2391  |
| 56  | H  | 4.0401  | 0.9117  | 4.3240  |
| 57  | H  | 2.8619  | 2.2135  | 4.0631  |
| 58  | C  | 3.8522  | 3.1193  | 1.6532  |
| 59  | H  | 4.5948  | 3.8318  | 2.0276  |
| 60  | H  | 2.8623  | 3.5030  | 1.9107  |
| 61  | H  | 3.9400  | 3.0698  | 0.5664  |
| 62  | O  | 2.3198  | 1.0128  | 0.8131  |
| 63  | O  | 3.1604  | -0.4408 | 2.3280  |
| 64  | C  | -0.3040 | -0.2724 | 2.7325  |
| 65  | C  | -1.3088 | 0.2462  | 3.7651  |
| 66  | C  | -2.1010 | -0.9657 | 4.3451  |
| 67  | H  | -2.8064 | -0.5625 | 5.0806  |
| 68  | H  | -1.3960 | -1.6047 | 4.8855  |
| 69  | C  | -2.8399 | -1.7873 | 3.3127  |
| 70  | C  | -4.1786 | -1.5303 | 2.9899  |
| 71  | H  | -4.7151 | -0.7443 | 3.5150  |
| 72  | C  | -0.5009 | 0.9050  | 4.9031  |
| 73  | H  | 0.1931  | 0.1926  | 5.3574  |
| 74  | H  | -1.1847 | 1.2709  | 5.6765  |
| 75  | H  | 0.0746  | 1.7589  | 4.5270  |
| 76  | C  | -2.2620 | 1.2738  | 3.1409  |
| 77  | H  | -2.9541 | 1.6374  | 3.9086  |
| 78  | H  | -2.8470 | 0.8464  | 2.3244  |
| 79  | H  | -1.7081 | 2.1293  | 2.7448  |
| 80  | O  | -0.3319 | 0.2616  | 1.5729  |
| 81  | O  | 0.4987  | -1.1860 | 3.0948  |
| 82  | Rh | 0.9492  | -0.3866 | 0.1144  |
| 83  | C  | 0.2045  | 0.9108  | -1.2511 |
| 84  | C  | 0.5586  | 0.6324  | -2.6744 |
| 85  | O  | -0.0793 | -0.3804 | -3.1985 |
| 86  | C  | 0.3950  | -0.9140 | -4.4834 |
| 87  | O  | 1.5010  | 1.2157  | -3.2328 |
| 88  | H  | 1.4681  | -0.7408 | -4.5409 |
| 89  | H  | -0.1049 | -0.3382 | -5.2661 |
| 90  | C  | 0.0391  | -2.3837 | -4.5189 |
| 91  | H  | -1.0416 | -2.5396 | -4.4633 |
| 92  | H  | 0.3999  | -2.8127 | -5.4590 |
| 93  | H  | 0.5126  | -2.9153 | -3.6885 |
| 94  | C  | -4.8671 | -0.5381 | -1.3837 |
| 95  | C  | -3.6145 | -0.2263 | -1.9393 |
| 96  | C  | -3.1928 | -0.7703 | -3.1443 |
| 97  | C  | -4.0076 | -1.6989 | -3.7963 |
| 98  | C  | -5.2296 | -2.0733 | -3.2409 |
| 99  | C  | -5.6573 | -1.4860 | -2.0542 |
| 100 | I  | -2.2882 | 1.1370  | -0.9165 |
| 101 | C  | -5.4083 | 0.1685  | -0.1911 |
| 102 | O  | -6.6093 | -0.2844 | 0.1816  |
| 103 | C  | -7.2192 | 0.4017  | 1.2947  |
| 104 | O  | -4.8441 | 1.0970  | 0.3675  |

|     |   |         |         |         |
|-----|---|---------|---------|---------|
| 105 | H | -2.2368 | -0.4958 | -3.5618 |
| 106 | H | -3.6757 | -2.1273 | -4.7366 |
| 107 | H | -5.8589 | -2.8027 | -3.7395 |
| 108 | H | -6.6239 | -1.7366 | -1.6353 |
| 109 | H | -7.3857 | 1.4507  | 1.0413  |
| 110 | H | -6.5769 | 0.3348  | 2.1747  |
| 111 | H | -8.1642 | -0.1111 | 1.4638  |
| 112 | C | 1.3220  | 3.1083  | -0.9157 |
| 113 | O | 0.3088  | 2.2923  | -0.8735 |
| 114 | O | 2.3344  | 2.9358  | -1.6624 |
| 115 | H | 2.1580  | 2.1572  | -2.3485 |
| 116 | C | 1.1951  | 4.3417  | -0.1008 |
| 117 | H | 0.8958  | 4.0649  | 0.9118  |
| 118 | H | 2.1750  | 4.8169  | -0.0681 |
| 119 | C | 0.1635  | 5.3461  | -0.7138 |
| 120 | C | 0.3553  | 6.6865  | -0.0398 |
| 121 | C | 0.7496  | 7.7891  | -0.6754 |
| 122 | H | 0.8621  | 8.7351  | -0.1537 |
| 123 | H | 0.9690  | 7.7869  | -1.7407 |
| 124 | H | 0.1351  | 6.7145  | 1.0269  |
| 125 | C | -1.2850 | 4.8978  | -0.5857 |
| 126 | C | -2.1366 | 4.9907  | -1.6926 |
| 127 | C | -3.4947 | 4.6869  | -1.5767 |
| 128 | C | -4.0194 | 4.2831  | -0.3481 |
| 129 | C | -3.1771 | 4.1826  | 0.7622  |
| 130 | C | -1.8218 | 4.4894  | 0.6445  |
| 131 | H | -1.1862 | 4.4135  | 1.5224  |
| 132 | H | -3.5735 | 3.8558  | 1.7183  |
| 133 | H | -5.0714 | 4.0341  | -0.2553 |
| 134 | H | -4.1406 | 4.7672  | -2.4462 |
| 135 | H | -1.7347 | 5.3160  | -2.6487 |
| 136 | H | 0.4018  | 5.4641  | -1.7765 |



|    |      | C <sub>2</sub> A |         |         |
|----|------|------------------|---------|---------|
|    | Atom | X                | Y       | Z       |
| 1  | C    | 3.4048           | -0.4208 | -1.7503 |
| 2  | C    | 4.1365           | -0.0564 | -3.0434 |
| 3  | C    | 5.5015           | 0.5981  | -2.6590 |
| 4  | H    | 6.1284           | -0.1692 | -2.1946 |
| 5  | H    | 5.9872           | 0.8962  | -3.5949 |
| 6  | C    | 5.3750           | 1.7819  | -1.7281 |
| 7  | C    | 5.2072           | 3.0853  | -2.2128 |
| 8  | H    | 5.2160           | 3.2666  | -3.2840 |
| 9  | C    | 5.0457           | 4.1524  | -1.3272 |
| 10 | H    | 4.9323           | 5.1618  | -1.7124 |
| 11 | C    | 5.3877           | 1.5814  | -0.3423 |
| 12 | H    | 5.5391           | 0.5785  | 0.0432  |
| 13 | C    | 4.4033           | -1.3636 | -3.8177 |
| 14 | H    | 4.9510           | -1.1376 | -4.7385 |
| 15 | H    | 4.9945           | -2.0621 | -3.2201 |
| 16 | H    | 3.4618           | -1.8521 | -4.0936 |
| 17 | C    | 3.2966           | 0.8970  | -3.9021 |
| 18 | H    | 3.8333           | 1.1138  | -4.8318 |
| 19 | H    | 2.3296           | 0.4529  | -4.1539 |
| 20 | H    | 3.1133           | 1.8399  | -3.3832 |
| 21 | C    | 1.1155           | -3.1209 | -0.9808 |
| 22 | C    | 0.5304           | -4.2119 | -1.8801 |
| 23 | C    | -0.1090          | -5.2965 | -0.9516 |
| 24 | H    | -0.6687          | -5.9801 | -1.5997 |
| 25 | H    | 0.7017           | -5.8718 | -0.4933 |
| 26 | C    | -0.9965          | -4.7394 | 0.1360  |
| 27 | C    | -2.3524          | -4.4548 | -0.0718 |
| 28 | H    | -2.8126          | -4.6808 | -1.0296 |
| 29 | C    | -3.1203          | -3.9054 | 0.9565  |
| 30 | H    | -4.1753          | -3.7059 | 0.7954  |
| 31 | C    | -0.4427          | -4.4662 | 1.3914  |
| 32 | H    | 0.6043           | -4.6978 | 1.5659  |
| 33 | C    | 1.6661           | -4.8531 | -2.6974 |
| 34 | H    | 2.4442           | -5.2566 | -2.0451 |
| 35 | H    | 1.2611           | -5.6682 | -3.3061 |
| 36 | H    | 2.1244           | -4.1201 | -3.3707 |
| 37 | C    | -0.5261          | -3.6204 | -2.8241 |
| 38 | H    | -0.9086          | -4.4112 | -3.4780 |
| 39 | H    | -1.3643          | -3.1907 | -2.2739 |
| 40 | H    | -0.0946          | -2.8338 | -3.4511 |
| 41 | O    | 2.2652           | 0.1227  | -1.5485 |
| 42 | O    | 3.9735           | -1.2403 | -0.9653 |
| 43 | O    | 0.4551           | -2.0290 | -0.9124 |
| 44 | O    | 2.1882           | -3.3586 | -0.3495 |
| 45 | Rh   | 3.0051           | -1.8236 | 0.7546  |
| 46 | C    | 3.1358           | 0.8984  | 1.7949  |
| 47 | C    | 3.7233           | 2.0621  | 2.5931  |
| 48 | C    | 5.1558           | 2.3538  | 2.0440  |
| 49 | H    | 5.7912           | 1.4935  | 2.2754  |
| 50 | H    | 5.5435           | 3.2088  | 2.6091  |
| 51 | C    | 5.2044           | 2.6356  | 0.5601  |

|     |    |         |         |         |
|-----|----|---------|---------|---------|
| 52  | C  | 5.0381  | 3.9301  | 0.0508  |
| 53  | H  | 4.9160  | 4.7659  | 0.7341  |
| 54  | C  | 3.8312  | 1.6136  | 4.0652  |
| 55  | H  | 4.2685  | 2.4212  | 4.6615  |
| 56  | H  | 4.4613  | 0.7256  | 4.1622  |
| 57  | H  | 2.8414  | 1.3850  | 4.4764  |
| 58  | C  | 2.8319  | 3.3073  | 2.4890  |
| 59  | H  | 3.2857  | 4.1221  | 3.0632  |
| 60  | H  | 1.8350  | 3.1152  | 2.8943  |
| 61  | H  | 2.7168  | 3.6357  | 1.4538  |
| 62  | O  | 2.0435  | 1.1164  | 1.1650  |
| 63  | O  | 3.7508  | -0.2108 | 1.8066  |
| 64  | C  | 0.7671  | -1.7780 | 2.6308  |
| 65  | C  | -0.0053 | -2.1368 | 3.9016  |
| 66  | C  | -0.5158 | -3.6071 | 3.7475  |
| 67  | H  | -1.1961 | -3.7956 | 4.5857  |
| 68  | H  | 0.3412  | -4.2773 | 3.8670  |
| 69  | C  | -1.1937 | -3.9065 | 2.4307  |
| 70  | C  | -2.5475 | -3.6293 | 2.1997  |
| 71  | H  | -3.1601 | -3.2169 | 2.9961  |
| 72  | C  | 0.9533  | -2.0629 | 5.1048  |
| 73  | H  | 1.8136  | -2.7218 | 4.9650  |
| 74  | H  | 0.4230  | -2.3663 | 6.0134  |
| 75  | H  | 1.3193  | -1.0402 | 5.2499  |
| 76  | C  | -1.1826 | -1.1756 | 4.1161  |
| 77  | H  | -1.7166 | -1.4600 | 5.0287  |
| 78  | H  | -1.8873 | -1.2000 | 3.2826  |
| 79  | H  | -0.8303 | -0.1476 | 4.2324  |
| 80  | O  | 0.2075  | -0.9473 | 1.8325  |
| 81  | O  | 1.8927  | -2.3232 | 2.4306  |
| 82  | Rh | 1.1579  | -0.3810 | 0.1111  |
| 83  | C  | -0.3485 | 0.5146  | -0.6562 |
| 84  | C  | -0.2497 | 1.3168  | -1.9151 |
| 85  | O  | 0.2212  | 2.5191  | -1.6274 |
| 86  | C  | 0.5240  | 3.4142  | -2.7459 |
| 87  | O  | -0.4649 | 0.8667  | -3.0248 |
| 88  | H  | -0.4257 | 3.7051  | -3.2035 |
| 89  | H  | 1.1078  | 2.8507  | -3.4746 |
| 90  | C  | 1.2838  | 4.5884  | -2.1702 |
| 91  | H  | 2.2203  | 4.2568  | -1.7122 |
| 92  | H  | 1.5205  | 5.2921  | -2.9747 |
| 93  | H  | 0.6869  | 5.1133  | -1.4176 |
| 94  | C  | -4.8430 | -1.0900 | -1.3996 |
| 95  | C  | -3.4948 | -0.8135 | -1.6537 |
| 96  | C  | -2.9230 | -0.9203 | -2.9071 |
| 97  | C  | -3.7456 | -1.3065 | -3.9726 |
| 98  | C  | -5.0972 | -1.5765 | -3.7667 |
| 99  | C  | -5.6401 | -1.4721 | -2.4888 |
| 100 | I  | -2.2491 | -0.2268 | 0.0477  |
| 101 | C  | -5.4065 | -1.0068 | -0.0322 |
| 102 | O  | -6.7260 | -1.1261 | 0.0095  |
| 103 | C  | -7.3349 | -1.0777 | 1.3219  |
| 104 | O  | -4.7076 | -0.8457 | 0.9656  |

|     |   |         |         |         |
|-----|---|---------|---------|---------|
| 105 | H | -1.8810 | -0.6901 | -3.0768 |
| 106 | H | -3.3114 | -1.3923 | -4.9634 |
| 107 | H | -5.7282 | -1.8737 | -4.5971 |
| 108 | H | -6.6863 | -1.6895 | -2.3110 |
| 109 | H | -7.1265 | -0.1145 | 1.7910  |
| 110 | H | -6.9459 | -1.8875 | 1.9416  |
| 111 | H | -8.4010 | -1.2009 | 1.1434  |
| 112 | C | -3.4910 | 6.1423  | 1.3887  |
| 113 | O | -4.5442 | 5.7821  | 1.8742  |
| 114 | O | -3.3138 | 7.3675  | 0.8514  |
| 115 | H | -4.1557 | 7.8520  | 0.9581  |
| 116 | C | -2.2240 | 5.3182  | 1.3332  |
| 117 | H | -1.6615 | 5.5804  | 0.4322  |
| 118 | H | -1.5999 | 5.6190  | 2.1850  |
| 119 | C | -2.5110 | 3.8078  | 1.4094  |
| 120 | C | -1.2201 | 3.0288  | 1.5280  |
| 121 | C | -0.9612 | 2.1507  | 2.5004  |
| 122 | H | -1.6821 | 1.9518  | 3.2907  |
| 123 | H | -0.0288 | 1.5985  | 2.5278  |
| 124 | H | -0.4777 | 3.1950  | 0.7484  |
| 125 | C | -3.3169 | 3.3231  | 0.2103  |
| 126 | C | -4.5537 | 2.6945  | 0.3926  |
| 127 | C | -5.2725 | 2.2024  | -0.6991 |
| 128 | C | -4.7555 | 2.3157  | -1.9911 |
| 129 | C | -3.5263 | 2.9499  | -2.1859 |
| 130 | C | -2.8212 | 3.4580  | -1.0933 |
| 131 | H | -1.8737 | 3.9592  | -1.2564 |
| 132 | H | -3.1194 | 3.0535  | -3.1877 |
| 133 | H | -5.3041 | 1.9131  | -2.8371 |
| 134 | H | -6.2358 | 1.7262  | -0.5407 |
| 135 | H | -4.9557 | 2.5917  | 1.3962  |
| 136 | H | -3.1084 | 3.6288  | 2.3085  |

|    |      | TS4 <sub>A</sub> |         |         |
|----|------|------------------|---------|---------|
|    | Atom | X                | Y       | Z       |
| 1  | C    | 3.4375           | -0.2054 | -1.7983 |
| 2  | C    | 4.1215           | 0.2198  | -3.0992 |
| 3  | C    | 5.4984           | 0.8612  | -2.7364 |
| 4  | H    | 6.1422           | 0.0765  | -2.3273 |
| 5  | H    | 5.9504           | 1.1999  | -3.6754 |
| 6  | C    | 5.4044           | 2.0043  | -1.7524 |
| 7  | C    | 5.2243           | 3.3275  | -2.1752 |
| 8  | H    | 5.1992           | 3.5543  | -3.2375 |
| 9  | C    | 5.0938           | 4.3557  | -1.2399 |
| 10 | H    | 4.9701           | 5.3807  | -1.5777 |
| 11 | C    | 5.4619           | 1.7448  | -0.3778 |
| 12 | H    | 5.6241           | 0.7264  | -0.0406 |
| 13 | C    | 4.3634           | -1.0504 | -3.9403 |
| 14 | H    | 4.8743           | -0.7813 | -4.8708 |
| 15 | H    | 4.9800           | -1.7710 | -3.3971 |
| 16 | H    | 3.4141           | -1.5323 | -4.2007 |
| 17 | C    | 3.2492           | 1.2081  | -3.8828 |
| 18 | H    | 3.7507           | 1.4682  | -4.8211 |
| 19 | H    | 2.2738           | 0.7736  | -4.1182 |
| 20 | H    | 3.0844           | 2.1260  | -3.3154 |
| 21 | C    | 1.1981           | -2.9626 | -1.0539 |
| 22 | C    | 0.5903           | -4.0382 | -1.9562 |
| 23 | C    | 0.0474           | -5.1763 | -1.0314 |
| 24 | H    | -0.5118          | -5.8678 | -1.6717 |
| 25 | H    | 0.9052           | -5.7250 | -0.6299 |
| 26 | C    | -0.8116          | -4.6918 | 0.1129  |
| 27 | C    | -2.1881          | -4.4702 | -0.0251 |
| 28 | H    | -2.6798          | -4.6923 | -0.9682 |
| 29 | C    | -2.9348          | -3.9906 | 1.0523  |
| 30 | H    | -4.0030          | -3.8333 | 0.9432  |
| 31 | C    | -0.2144          | -4.4272 | 1.3504  |
| 32 | H    | 0.8493           | -4.6113 | 1.4711  |
| 33 | C    | 1.6943           | -4.6100 | -2.8646 |
| 34 | H    | 2.5210           | -5.0146 | -2.2758 |
| 35 | H    | 1.2781           | -5.4123 | -3.4829 |
| 36 | H    | 2.0904           | -3.8364 | -3.5320 |
| 37 | C    | -0.5404          | -3.4521 | -2.8124 |
| 38 | H    | -0.9425          | -4.2341 | -3.4651 |
| 39 | H    | -1.3535          | -3.0638 | -2.1978 |
| 40 | H    | -0.1731          | -2.6350 | -3.4410 |
| 41 | O    | 2.3034           | 0.3208  | -1.5324 |
| 42 | O    | 4.0386           | -1.0554 | -1.0717 |
| 43 | O    | 0.5408           | -1.8722 | -0.9429 |
| 44 | O    | 2.2895           | -3.2133 | -0.4610 |
| 45 | Rh   | 3.1434           | -1.7117 | 0.6617  |
| 46 | C    | 3.2933           | 0.9585  | 1.8080  |
| 47 | C    | 3.9071           | 2.0886  | 2.6355  |
| 48 | C    | 5.3158           | 2.4136  | 2.0456  |
| 49 | H    | 5.9634           | 1.5481  | 2.2156  |
| 50 | H    | 5.7209           | 3.2456  | 2.6325  |
| 51 | C    | 5.3101           | 2.7593  | 0.5745  |

|     |    |         |         |         |
|-----|----|---------|---------|---------|
| 52  | C  | 5.1292  | 4.0745  | 0.1270  |
| 53  | H  | 5.0309  | 4.8804  | 0.8489  |
| 54  | C  | 4.0768  | 1.5732  | 4.0799  |
| 55  | H  | 4.5334  | 2.3553  | 4.6955  |
| 56  | H  | 4.7153  | 0.6865  | 4.1096  |
| 57  | H  | 3.1060  | 1.3177  | 4.5196  |
| 58  | C  | 3.0093  | 3.3327  | 2.6275  |
| 59  | H  | 3.4920  | 4.1286  | 3.2045  |
| 60  | H  | 2.0403  | 3.1200  | 3.0878  |
| 61  | H  | 2.8322  | 3.6985  | 1.6137  |
| 62  | O  | 2.1731  | 1.1889  | 1.2343  |
| 63  | O  | 3.9227  | -0.1404 | 1.7440  |
| 64  | C  | 0.9664  | -1.7551 | 2.6137  |
| 65  | C  | 0.2405  | -2.1554 | 3.8984  |
| 66  | C  | -0.2272 | -3.6390 | 3.7352  |
| 67  | H  | -0.8697 | -3.8656 | 4.5935  |
| 68  | H  | 0.6557  | -4.2814 | 3.8109  |
| 69  | C  | -0.9445 | -3.9361 | 2.4387  |
| 70  | C  | -2.3192 | -3.7214 | 2.2764  |
| 71  | H  | -2.9136 | -3.3634 | 3.1121  |
| 72  | C  | 1.2285  | -2.0681 | 5.0767  |
| 73  | H  | 2.1048  | -2.6975 | 4.9037  |
| 74  | H  | 0.7330  | -2.4011 | 5.9946  |
| 75  | H  | 1.5665  | -1.0367 | 5.2276  |
| 76  | C  | -0.9599 | -1.2327 | 4.1546  |
| 77  | H  | -1.4508 | -1.5302 | 5.0871  |
| 78  | H  | -1.6937 | -1.2860 | 3.3476  |
| 79  | H  | -0.6384 | -0.1914 | 4.2544  |
| 80  | O  | 0.3626  | -0.9188 | 1.8542  |
| 81  | O  | 2.0960  | -2.2713 | 2.3644  |
| 82  | Rh | 1.2555  | -0.2703 | 0.1377  |
| 83  | C  | -0.2924 | 0.6804  | -0.4966 |
| 84  | C  | -0.2442 | 1.6112  | -1.6676 |
| 85  | O  | 0.2685  | 2.7778  | -1.3178 |
| 86  | C  | 0.5666  | 3.7251  | -2.3930 |
| 87  | O  | -0.5141 | 1.2516  | -2.7994 |
| 88  | H  | -0.3847 | 4.0496  | -2.8238 |
| 89  | H  | 1.1352  | 3.1941  | -3.1575 |
| 90  | C  | 1.3463  | 4.8610  | -1.7696 |
| 91  | H  | 2.2838  | 4.4968  | -1.3396 |
| 92  | H  | 1.5834  | 5.6000  | -2.5417 |
| 93  | H  | 0.7623  | 5.3554  | -0.9869 |
| 94  | C  | -4.7103 | -1.1075 | -1.5495 |
| 95  | C  | -3.3687 | -0.7621 | -1.7462 |
| 96  | C  | -2.7743 | -0.7179 | -2.9934 |
| 97  | C  | -3.5634 | -1.0202 | -4.1090 |
| 98  | C  | -4.9063 | -1.3611 | -3.9585 |
| 99  | C  | -5.4730 | -1.4070 | -2.6884 |
| 100 | I  | -2.1599 | -0.3346 | 0.0274  |
| 101 | C  | -5.3091 | -1.1684 | -0.1960 |
| 102 | O  | -6.6311 | -1.2825 | -0.2051 |
| 103 | C  | -7.2763 | -1.3539 | 1.0879  |
| 104 | O  | -4.6394 | -1.1167 | 0.8317  |

|     |   |         |         |         |
|-----|---|---------|---------|---------|
| 105 | H | -1.7400 | -0.4329 | -3.1152 |
| 106 | H | -3.1105 | -0.9861 | -5.0946 |
| 107 | H | -5.5119 | -1.5956 | -4.8272 |
| 108 | H | -6.5139 | -1.6752 | -2.5547 |
| 109 | H | -7.0719 | -0.4431 | 1.6535  |
| 110 | H | -6.9128 | -2.2240 | 1.6377  |
| 111 | H | -8.3382 | -1.4465 | 0.8698  |
| 112 | C | -4.8594 | 4.8820  | 2.1703  |
| 113 | O | -5.5133 | 4.0118  | 2.7107  |
| 114 | O | -5.3579 | 6.1020  | 1.8893  |
| 115 | H | -6.2800 | 6.1182  | 2.2131  |
| 116 | C | -3.4055 | 4.7613  | 1.7703  |
| 117 | H | -3.1805 | 5.4759  | 0.9739  |
| 118 | H | -2.8102 | 5.0549  | 2.6451  |
| 119 | C | -3.0271 | 3.3235  | 1.3472  |
| 120 | C | -1.5269 | 3.2043  | 1.2638  |
| 121 | C | -0.7944 | 2.2846  | 1.9060  |
| 122 | H | -1.2537 | 1.5415  | 2.5547  |
| 123 | H | 0.2861  | 2.2617  | 1.8288  |
| 124 | H | -1.0133 | 3.9297  | 0.6374  |
| 125 | C | -3.7159 | 2.9509  | 0.0360  |
| 126 | C | -4.9474 | 2.2810  | 0.0580  |
| 127 | C | -5.6017 | 1.9527  | -1.1303 |
| 128 | C | -5.0250 | 2.2672  | -2.3628 |
| 129 | C | -3.8000 | 2.9339  | -2.3964 |
| 130 | C | -3.1589 | 3.2841  | -1.2059 |
| 131 | H | -2.2168 | 3.8195  | -1.2498 |
| 132 | H | -3.3395 | 3.1842  | -3.3475 |
| 133 | H | -5.5215 | 1.9862  | -3.2863 |
| 134 | H | -6.5548 | 1.4335  | -1.0922 |
| 135 | H | -5.3943 | 2.0269  | 1.0134  |
| 136 | H | -3.3906 | 2.6443  | 2.1251  |

|    |      | <b>D<sub>2</sub></b> |         |         |
|----|------|----------------------|---------|---------|
|    | Atom | X                    | Y       | Z       |
| 1  | C    | 3.4843               | -0.8383 | -1.5478 |
| 2  | C    | 4.3450               | -0.7991 | -2.8146 |
| 3  | C    | 5.6482               | -0.0043 | -2.4830 |
| 4  | H    | 6.2607               | -0.6214 | -1.8184 |
| 5  | H    | 6.2016               | 0.1135  | -3.4218 |
| 6  | C    | 5.4090               | 1.3384  | -1.8337 |
| 7  | C    | 5.1798               | 2.4985  | -2.5846 |
| 8  | H    | 5.2163               | 2.4545  | -3.6696 |
| 9  | C    | 4.9259               | 3.7133  | -1.9446 |
| 10 | H    | 4.7651               | 4.6112  | -2.5349 |
| 11 | C    | 5.3841               | 1.4316  | -0.4377 |
| 12 | H    | 5.5682               | 0.5395  | 0.1523  |
| 13 | C    | 4.7259               | -2.2426 | -3.1967 |
| 14 | H    | 5.3663               | -2.2320 | -4.0853 |
| 15 | H    | 5.2632               | -2.7361 | -2.3832 |
| 16 | H    | 3.8325               | -2.8341 | -3.4288 |
| 17 | C    | 3.5859               | -0.1422 | -3.9735 |
| 18 | H    | 4.2362               | -0.0895 | -4.8534 |
| 19 | H    | 2.7066               | -0.7365 | -4.2374 |
| 20 | H    | 3.2532               | 0.8665  | -3.7213 |
| 21 | C    | 0.9339               | -3.1707 | -0.4201 |
| 22 | C    | 0.3311               | -4.4294 | -1.0496 |
| 23 | C    | -0.2441              | -5.3116 | 0.1040  |
| 24 | H    | -0.7555              | -6.1605 | -0.3643 |
| 25 | H    | 0.5981               | -5.7126 | 0.6764  |
| 26 | C    | -1.1786              | -4.5788 | 1.0381  |
| 27 | C    | -2.5460              | -4.4435 | 0.7648  |
| 28 | H    | -2.9681              | -4.9134 | -0.1192 |
| 29 | C    | -3.3720              | -3.7260 | 1.6316  |
| 30 | H    | -4.4291              | -3.6264 | 1.4094  |
| 31 | C    | -0.6697              | -3.9866 | 2.1996  |
| 32 | H    | 0.3866               | -4.0941 | 2.4255  |
| 33 | C    | 1.4557               | -5.2061 | -1.7612 |
| 34 | H    | 2.2578               | -5.4634 | -1.0649 |
| 35 | H    | 1.0524               | -6.1298 | -2.1900 |
| 36 | H    | 1.8836               | -4.6113 | -2.5766 |
| 37 | C    | -0.7674              | -4.0680 | -2.0579 |
| 38 | H    | -1.1771              | -4.9864 | -2.4925 |
| 39 | H    | -1.5820              | -3.5130 | -1.5890 |
| 40 | H    | -0.3659              | -3.4534 | -2.8674 |
| 41 | O    | 2.3743               | -0.2101 | -1.5690 |
| 42 | O    | 3.9448               | -1.4853 | -0.5556 |
| 43 | O    | 0.3771               | -2.0560 | -0.7009 |
| 44 | O    | 1.9364               | -3.3138 | 0.3434  |
| 45 | Rh   | 2.8251               | -1.6358 | 1.1726  |
| 46 | C    | 3.0076               | 1.2285  | 1.6763  |
| 47 | C    | 3.6248               | 2.4740  | 2.3224  |
| 48 | C    | 5.0587               | 2.6594  | 1.7306  |
| 49 | H    | 5.6943               | 1.8622  | 2.1276  |
| 50 | H    | 5.4448               | 3.6091  | 2.1186  |
| 51 | C    | 5.1199               | 2.6373  | 0.2213  |

|     |    |         |         |         |
|-----|----|---------|---------|---------|
| 52  | C  | 4.8944  | 3.7845  | -0.5506 |
| 53  | H  | 4.7117  | 4.7371  | -0.0611 |
| 54  | C  | 3.7431  | 2.2284  | 3.8397  |
| 55  | H  | 4.2176  | 3.0931  | 4.3162  |
| 56  | H  | 4.3425  | 1.3392  | 4.0490  |
| 57  | H  | 2.7535  | 2.0928  | 4.2913  |
| 58  | C  | 2.7704  | 3.7191  | 2.0714  |
| 59  | H  | 3.2568  | 4.5917  | 2.5204  |
| 60  | H  | 1.7876  | 3.6070  | 2.5361  |
| 61  | H  | 2.6326  | 3.9090  | 1.0058  |
| 62  | O  | 1.9726  | 1.3719  | 0.9391  |
| 63  | O  | 3.5875  | 0.1252  | 1.9176  |
| 64  | C  | 0.4523  | -1.0924 | 2.7817  |
| 65  | C  | -0.4089 | -1.1180 | 4.0473  |
| 66  | C  | -0.8617 | -2.5940 | 4.2844  |
| 67  | H  | -1.5679 | -2.5840 | 5.1225  |
| 68  | H  | 0.0138  | -3.1691 | 4.6016  |
| 69  | C  | -1.4800 | -3.2542 | 3.0749  |
| 70  | C  | -2.8436 | -3.1315 | 2.7785  |
| 71  | H  | -3.4957 | -2.5853 | 3.4548  |
| 72  | C  | 0.4504  | -0.6618 | 5.2418  |
| 73  | H  | 1.3312  | -1.2978 | 5.3584  |
| 74  | H  | -0.1424 | -0.7100 | 6.1616  |
| 75  | H  | 0.7870  | 0.3728  | 5.1081  |
| 76  | C  | -1.6216 | -0.1912 | 3.8987  |
| 77  | H  | -2.2302 | -0.2346 | 4.8084  |
| 78  | H  | -2.2445 | -0.4722 | 3.0477  |
| 79  | H  | -1.2973 | 0.8434  | 3.7531  |
| 80  | O  | -0.0232 | -0.4848 | 1.7626  |
| 81  | O  | 1.5730  | -1.6844 | 2.8223  |
| 82  | Rh | 1.1221  | -0.3033 | 0.0640  |
| 83  | C  | -0.4724 | 0.8109  | -0.8678 |
| 84  | C  | -0.1649 | 0.9952  | -2.3038 |
| 85  | O  | -0.5191 | -0.0111 | -3.0676 |
| 86  | C  | -0.1496 | 0.0359  | -4.4852 |
| 87  | O  | 0.4546  | 1.9859  | -2.7353 |
| 88  | H  | 0.8375  | 0.4888  | -4.5645 |
| 89  | H  | -0.8830 | 0.6800  | -4.9773 |
| 90  | C  | -0.1845 | -1.3837 | -5.0036 |
| 91  | H  | -1.1714 | -1.8330 | -4.8588 |
| 92  | H  | 0.0412  | -1.3784 | -6.0747 |
| 93  | H  | 0.5623  | -2.0008 | -4.4953 |
| 94  | C  | -5.0033 | 0.2857  | -1.7741 |
| 95  | C  | -3.6750 | 0.7188  | -1.7077 |
| 96  | C  | -3.2362 | 1.8387  | -2.3939 |
| 97  | C  | -4.1429 | 2.5353  | -3.1986 |
| 98  | C  | -5.4675 | 2.1145  | -3.3015 |
| 99  | C  | -5.8956 | 1.0006  | -2.5868 |
| 100 | I  | -2.2657 | -0.4064 | -0.4899 |
| 101 | C  | -5.4584 | -0.8725 | -0.9725 |
| 102 | O  | -6.7568 | -1.1197 | -1.0694 |
| 103 | C  | -7.2553 | -2.2363 | -0.2956 |
| 104 | O  | -4.6951 | -1.5312 | -0.2695 |



|     |   |         |         |         |
|-----|---|---------|---------|---------|
| 105 | H | -2.2243 | 2.2065  | -2.3142 |
| 106 | H | -3.8005 | 3.4135  | -3.7359 |
| 107 | H | -6.1670 | 2.6574  | -3.9275 |
| 108 | H | -6.9259 | 0.6707  | -2.6396 |
| 109 | H | -7.0644 | -2.0662 | 0.7655  |
| 110 | H | -6.7685 | -3.1584 | -0.6184 |
| 111 | H | -8.3236 | -2.2679 | -0.4994 |
| 112 | C | -0.1137 | 3.1321  | -0.0238 |
| 113 | O | -0.7726 | 2.0189  | -0.1281 |
| 114 | O | 0.7733  | 3.5190  | -0.8450 |
| 115 | H | 0.8040  | 2.8755  | -1.6928 |
| 116 | C | -0.5426 | 4.0198  | 1.0907  |
| 117 | H | -0.5126 | 3.4500  | 2.0226  |
| 118 | H | 0.1781  | 4.8343  | 1.1568  |
| 119 | C | -1.9634 | 4.6284  | 0.8697  |
| 120 | C | -2.1708 | 5.7128  | 1.9047  |
| 121 | C | -2.3210 | 7.0045  | 1.6145  |
| 122 | H | -2.4807 | 7.7464  | 2.3916  |
| 123 | H | -2.2945 | 7.3662  | 0.5889  |
| 124 | H | -2.2078 | 5.3713  | 2.9391  |
| 125 | C | -3.1173 | 3.6352  | 0.9399  |
| 126 | C | -4.2402 | 3.8535  | 0.1303  |
| 127 | C | -5.3668 | 3.0395  | 0.2334  |
| 128 | C | -5.3849 | 1.9815  | 1.1452  |
| 129 | C | -4.2712 | 1.7526  | 1.9546  |
| 130 | C | -3.1494 | 2.5779  | 1.8560  |
| 131 | H | -2.2968 | 2.3791  | 2.4957  |
| 132 | H | -4.2717 | 0.9319  | 2.6656  |
| 133 | H | -6.2599 | 1.3426  | 1.2238  |
| 134 | H | -6.2238 | 3.2229  | -0.4067 |
| 135 | H | -4.2322 | 4.6748  | -0.5812 |
| 136 | H | -1.9719 | 5.1000  | -0.1197 |

|    |      | F       |         |         |
|----|------|---------|---------|---------|
|    | Atom | X       | Y       | Z       |
| 1  | C    | -1.9438 | -0.2973 | -0.8201 |
| 2  | C    | -2.7989 | -1.4319 | -0.3317 |
| 3  | O    | -3.9467 | -0.9673 | 0.1545  |
| 4  | C    | -4.8984 | -1.9604 | 0.6484  |
| 5  | O    | -2.4862 | -2.6055 | -0.3895 |
| 6  | H    | -4.4059 | -2.5330 | 1.4383  |
| 7  | H    | -5.1363 | -2.6369 | -0.1758 |
| 8  | C    | -6.1092 | -1.2033 | 1.1478  |
| 9  | H    | -6.5699 | -0.6258 | 0.3406  |
| 10 | H    | -6.8479 | -1.9158 | 1.5280  |
| 11 | H    | -5.8374 | -0.5213 | 1.9592  |
| 12 | C    | 2.3287  | -1.6076 | 0.3498  |
| 13 | C    | 0.9393  | -1.7041 | 0.2554  |
| 14 | C    | 0.1485  | -2.2764 | 1.2344  |
| 15 | C    | 0.7818  | -2.7686 | 2.3810  |
| 16 | C    | 2.1650  | -2.6816 | 2.5226  |
| 17 | C    | 2.9310  | -2.1041 | 1.5156  |
| 18 | I    | -0.0073 | -0.9365 | -1.5702 |
| 19 | C    | 3.1470  | -1.0528 | -0.7551 |
| 20 | O    | 4.3850  | -0.7468 | -0.3929 |
| 21 | C    | 5.2464  | -0.2229 | -1.4308 |
| 22 | O    | 2.7102  | -0.9069 | -1.8928 |
| 23 | H    | -0.9202 | -2.3729 | 1.1224  |
| 24 | H    | 0.1756  | -3.2244 | 3.1569  |
| 25 | H    | 2.6487  | -3.0674 | 3.4132  |
| 26 | H    | 4.0078  | -2.0322 | 1.6075  |
| 27 | H    | 4.8276  | 0.7048  | -1.8246 |
| 28 | H    | 5.3511  | -0.9558 | -2.2329 |
| 29 | H    | 6.2012  | -0.0418 | -0.9416 |
| 30 | C    | -0.4596 | 4.5709  | -0.1274 |
| 31 | O    | 0.3890  | 4.5422  | -0.9964 |
| 32 | O    | -0.6244 | 5.6161  | 0.7045  |
| 33 | H    | 0.0340  | 6.2937  | 0.4540  |
| 34 | C    | -1.4751 | 3.4795  | 0.1317  |
| 35 | H    | -1.8290 | 3.5389  | 1.1641  |
| 36 | H    | -2.3355 | 3.6852  | -0.5194 |
| 37 | C    | -0.9075 | 2.0800  | -0.1837 |
| 38 | C    | -2.0812 | 1.1101  | -0.2743 |
| 39 | C    | -2.6291 | 0.7966  | -1.6310 |
| 40 | H    | -2.0989 | 1.2100  | -2.4846 |
| 41 | H    | -3.6937 | 0.6528  | -1.7797 |
| 42 | H    | -2.7935 | 1.1589  | 0.5448  |
| 43 | C    | 0.1666  | 1.6775  | 0.8109  |
| 44 | C    | 1.5148  | 1.8942  | 0.4919  |
| 45 | C    | 2.5222  | 1.5663  | 1.3982  |
| 46 | C    | 2.1945  | 1.0069  | 2.6351  |
| 47 | C    | 0.8561  | 0.7832  | 2.9592  |
| 48 | C    | -0.1518 | 1.1200  | 2.0537  |
| 49 | H    | -1.1889 | 0.9345  | 2.3188  |
| 50 | H    | 0.5943  | 0.3381  | 3.9142  |
| 51 | H    | 2.9775  | 0.7360  | 3.3365  |

|    |   |         |        |         |
|----|---|---------|--------|---------|
| 52 | H | 3.5620  | 1.7315 | 1.1327  |
| 53 | H | 1.7681  | 2.3293 | -0.4696 |
| 54 | H | -0.4404 | 2.1503 | -1.1707 |

|    |      | TS3 <sub>PRC</sub> |         |         |
|----|------|--------------------|---------|---------|
|    | Atom | X                  | Y       | Z       |
| 1  | C    | 0.1107             | 3.0056  | -0.9953 |
| 2  | C    | -0.3543            | 4.1562  | -1.8952 |
| 3  | C    | -1.2397            | 5.1165  | -1.0405 |
| 4  | H    | -0.5982            | 5.5909  | -0.2914 |
| 5  | H    | -1.5983            | 5.9055  | -1.7118 |
| 6  | C    | -2.4041            | 4.4436  | -0.3512 |
| 7  | C    | -3.6517            | 4.3091  | -0.9743 |
| 8  | H    | -3.8078            | 4.7330  | -1.9626 |
| 9  | C    | -4.6966            | 3.6473  | -0.3271 |
| 10 | H    | -5.6644            | 3.5596  | -0.8133 |
| 11 | C    | -2.2383            | 3.9094  | 0.9321  |
| 12 | H    | -1.2790            | 4.0172  | 1.4270  |
| 13 | C    | 0.8951             | 4.9247  | -2.3705 |
| 14 | H    | 0.5921             | 5.7737  | -2.9932 |
| 15 | H    | 1.4715             | 5.3007  | -1.5212 |
| 16 | H    | 1.5455             | 4.2782  | -2.9707 |
| 17 | C    | -1.1321            | 3.6290  | -3.1077 |
| 18 | H    | -1.4523            | 4.4730  | -3.7291 |
| 19 | H    | -0.5048            | 2.9715  | -3.7168 |
| 20 | H    | -2.0167            | 3.0644  | -2.8058 |
| 21 | C    | 3.1115             | 0.8654  | -0.9778 |
| 22 | C    | 4.3714             | 0.8042  | -1.8504 |
| 23 | C    | 5.5881             | 0.4370  | -0.9458 |
| 24 | H    | 6.4708             | 0.4000  | -1.5948 |
| 25 | H    | 5.7396             | 1.2553  | -0.2352 |
| 26 | C    | 5.4415             | -0.8656 | -0.1924 |
| 27 | C    | 5.9330             | -2.0721 | -0.7071 |
| 28 | H    | 6.4619             | -2.0758 | -1.6566 |
| 29 | C    | 5.7580             | -3.2639 | -0.0012 |
| 30 | H    | 6.1519             | -4.1931 | -0.4038 |
| 31 | C    | 4.7857             | -0.8862 | 1.0444  |
| 32 | H    | 4.4218             | 0.0453  | 1.4617  |
| 33 | C    | 4.5985             | 2.2126  | -2.4382 |
| 34 | H    | 4.7185             | 2.9547  | -1.6442 |
| 35 | H    | 5.5014             | 2.2134  | -3.0588 |
| 36 | H    | 3.7530             | 2.5130  | -3.0679 |
| 37 | C    | 4.2103             | -0.2130 | -2.9865 |
| 38 | H    | 5.1267             | -0.2378 | -3.5867 |
| 39 | H    | 4.0226             | -1.2169 | -2.6003 |
| 40 | H    | 3.3767             | 0.0590  | -3.6402 |
| 41 | O    | -0.2333            | 1.8264  | -1.3380 |
| 42 | O    | 0.8030             | 3.3053  | 0.0254  |
| 43 | O    | 2.1225             | 0.1410  | -1.3273 |
| 44 | O    | 3.1436             | 1.6427  | 0.0263  |
| 45 | Rh   | 0.3693             | 0.1944  | -0.2403 |
| 46 | Rh   | 1.4887             | 1.7895  | 1.2565  |
| 47 | C    | -1.2433            | 1.1091  | 2.0147  |
| 48 | C    | -2.4962            | 1.1430  | 2.8979  |
| 49 | C    | -3.0154            | 2.6141  | 2.9472  |
| 50 | H    | -2.2776            | 3.2154  | 3.4874  |
| 51 | H    | -3.9355            | 2.6113  | 3.5432  |

|     |   |         |         |         |
|-----|---|---------|---------|---------|
| 52  | C | -3.2687 | 3.2273  | 1.5895  |
| 53  | C | -4.5072 | 3.1066  | 0.9459  |
| 54  | H | -5.3270 | 2.5988  | 1.4471  |
| 55  | C | -2.0913 | 0.7083  | 4.3204  |
| 56  | H | -2.9629 | 0.7519  | 4.9826  |
| 57  | H | -1.3119 | 1.3606  | 4.7227  |
| 58  | H | -1.7151 | -0.3212 | 4.3212  |
| 59  | C | -3.5804 | 0.2026  | 2.3574  |
| 60  | H | -4.4668 | 0.2602  | 2.9992  |
| 61  | H | -3.2342 | -0.8347 | 2.3480  |
| 62  | H | -3.8713 | 0.4724  | 1.3398  |
| 63  | O | -1.2858 | 0.3742  | 0.9718  |
| 64  | O | -0.2534 | 1.8125  | 2.3804  |
| 65  | C | 1.7815  | -1.0052 | 2.0177  |
| 66  | C | 2.2685  | -2.1550 | 2.9092  |
| 67  | C | 3.8172  | -2.0486 | 3.0601  |
| 68  | H | 4.1354  | -2.8806 | 3.6990  |
| 69  | H | 4.0418  | -1.1212 | 3.5957  |
| 70  | C | 4.5795  | -2.0747 | 1.7547  |
| 71  | C | 5.0781  | -3.2683 | 1.2177  |
| 72  | H | 4.9439  | -4.1999 | 1.7612  |
| 73  | C | 1.6221  | -1.9715 | 4.2982  |
| 74  | H | 1.8949  | -1.0065 | 4.7335  |
| 75  | H | 1.9578  | -2.7682 | 4.9712  |
| 76  | H | 0.5293  | -2.0235 | 4.2290  |
| 77  | C | 1.8717  | -3.5176 | 2.3308  |
| 78  | H | 2.2612  | -4.3150 | 2.9735  |
| 79  | H | 2.2714  | -3.6564 | 1.3245  |
| 80  | H | 0.7845  | -3.6178 | 2.2813  |
| 81  | O | 1.0897  | -1.3050 | 0.9904  |
| 82  | O | 2.0976  | 0.1702  | 2.3823  |
| 83  | O | -1.7736 | -0.5314 | -1.9236 |
| 84  | C | -2.6513 | -1.1097 | -2.9629 |
| 85  | O | -2.6074 | -0.6133 | -4.0428 |
| 86  | C | -3.6959 | -2.0390 | -2.4035 |
| 87  | H | -4.6564 | -1.5856 | -2.6744 |
| 88  | H | -3.6228 | -2.9694 | -2.9758 |
| 89  | C | -3.6636 | -2.3147 | -0.8817 |
| 90  | C | -4.9891 | -2.9318 | -0.4491 |
| 91  | C | -5.8055 | -2.2617 | 0.4687  |
| 92  | C | -7.0203 | -2.8145 | 0.8788  |
| 93  | C | -7.4340 | -4.0486 | 0.3746  |
| 94  | C | -6.6256 | -4.7249 | -0.5426 |
| 95  | C | -5.4122 | -4.1704 | -0.9506 |
| 96  | H | -4.7933 | -4.7097 | -1.6627 |
| 97  | H | -6.9393 | -5.6856 | -0.9409 |
| 98  | H | -8.3782 | -4.4808 | 0.6928  |
| 99  | H | -7.6417 | -2.2798 | 1.5917  |
| 100 | H | -5.4886 | -1.3004 | 0.8626  |
| 101 | C | -2.5172 | -3.2112 | -0.4817 |
| 102 | C | -1.6190 | -2.9135 | 0.4623  |
| 103 | H | -0.8182 | -3.6004 | 0.7148  |
| 104 | H | -1.6421 | -1.9706 | 0.9987  |

|     |   |         |         |         |
|-----|---|---------|---------|---------|
| 105 | C | -0.6255 | -0.9649 | -1.5139 |
| 106 | C | -0.1721 | -2.2336 | -2.2372 |
| 107 | O | -0.8446 | -2.7582 | -3.1110 |
| 108 | O | 1.0012  | -2.6490 | -1.8109 |
| 109 | C | 1.5232  | -3.8583 | -2.4355 |
| 110 | C | 2.8395  | -4.1810 | -1.7664 |
| 111 | H | 3.2722  | -5.0734 | -2.2302 |
| 112 | H | 3.5491  | -3.3569 | -1.8695 |
| 113 | H | 2.7011  | -4.3774 | -0.7001 |
| 114 | H | 0.7794  | -4.6493 | -2.3056 |
| 115 | H | 1.6344  | -3.6597 | -3.5050 |
| 116 | H | -2.4498 | -4.1610 | -1.0115 |
| 117 | H | -3.5532 | -1.3599 | -0.3602 |

## TS3

|    | Atom | X       | Y       | Z       |
|----|------|---------|---------|---------|
| 1  | C    | 0.4601  | 2.8191  | -1.4388 |
| 2  | C    | 0.0838  | 3.8470  | -2.5115 |
| 3  | C    | -0.4079 | 5.1427  | -1.7928 |
| 4  | H    | 0.4495  | 5.5929  | -1.2826 |
| 5  | H    | -0.7280 | 5.8422  | -2.5739 |
| 6  | C    | -1.5228 | 4.9197  | -0.7976 |
| 7  | C    | -2.8704 | 4.9582  | -1.1786 |
| 8  | H    | -3.1321 | 5.1938  | -2.2066 |
| 9  | C    | -3.8760 | 4.7097  | -0.2429 |
| 10 | H    | -4.9186 | 4.7546  | -0.5455 |
| 11 | C    | -1.2154 | 4.6371  | 0.5386  |
| 12 | H    | -0.1751 | 4.6147  | 0.8457  |
| 13 | C    | 1.3507  | 4.1816  | -3.3237 |
| 14 | H    | 1.1153  | 4.9370  | -4.0815 |
| 15 | H    | 2.1419  | 4.5690  | -2.6764 |
| 16 | H    | 1.7299  | 3.2912  | -3.8382 |
| 17 | C    | -1.0004 | 3.2912  | -3.4441 |
| 18 | H    | -1.2589 | 4.0479  | -4.1935 |
| 19 | H    | -0.6434 | 2.3978  | -3.9649 |
| 20 | H    | -1.9042 | 3.0169  | -2.8968 |
| 21 | C    | 2.8429  | 0.0150  | -1.3828 |
| 22 | C    | 3.8455  | -0.5379 | -2.4031 |
| 23 | C    | 5.1359  | -0.9857 | -1.6500 |
| 24 | H    | 5.8356  | -1.3604 | -2.4061 |
| 25 | H    | 5.5885  | -0.0986 | -1.1968 |
| 26 | C    | 4.9070  | -2.0382 | -0.5887 |
| 27 | C    | 5.0487  | -3.4038 | -0.8671 |
| 28 | H    | 5.3635  | -3.7205 | -1.8580 |
| 29 | C    | 4.7977  | -4.3560 | 0.1226  |
| 30 | H    | 4.9200  | -5.4124 | -0.1003 |
| 31 | C    | 4.5213  | -1.6574 | 0.7024  |
| 32 | H    | 4.4311  | -0.6028 | 0.9343  |
| 33 | C    | 4.2057  | 0.6133  | -3.3654 |
| 34 | H    | 4.6363  | 1.4583  | -2.8214 |
| 35 | H    | 4.9345  | 0.2636  | -4.1049 |
| 36 | H    | 3.3170  | 0.9635  | -3.9029 |
| 37 | C    | 3.2452  | -1.7073 | -3.1922 |
| 38 | H    | 3.9774  | -2.0687 | -3.9228 |
| 39 | H    | 2.9818  | -2.5360 | -2.5317 |
| 40 | H    | 2.3436  | -1.3985 | -3.7282 |
| 41 | O    | -0.1969 | 1.7284  | -1.4291 |
| 42 | O    | 1.3942  | 3.1261  | -0.6341 |
| 43 | O    | 1.6689  | -0.4811 | -1.3849 |
| 44 | O    | 3.2543  | 0.9410  | -0.6160 |
| 45 | Rh   | 0.2438  | 0.2445  | -0.0767 |
| 46 | Rh   | 1.9737  | 1.7479  | 0.7949  |
| 47 | C    | -0.6202 | 1.9545  | 2.1166  |
| 48 | C    | -1.6222 | 2.4817  | 3.1501  |
| 49 | C    | -1.8166 | 4.0108  | 2.9019  |
| 50 | H    | -0.8799 | 4.5159  | 3.1577  |
| 51 | H    | -2.5790 | 4.3576  | 3.6095  |

|     |   |         |         |         |
|-----|---|---------|---------|---------|
| 52  | C | -2.2091 | 4.3687  | 1.4871  |
| 53  | C | -3.5492 | 4.4138  | 1.0817  |
| 54  | H | -4.3374 | 4.2291  | 1.8068  |
| 55  | C | -1.0188 | 2.2790  | 4.5540  |
| 56  | H | -1.7044 | 2.6734  | 5.3121  |
| 57  | H | -0.0594 | 2.7942  | 4.6470  |
| 58  | H | -0.8604 | 1.2140  | 4.7602  |
| 59  | C | -2.9603 | 1.7378  | 3.0492  |
| 60  | H | -3.6587 | 2.1422  | 3.7904  |
| 61  | H | -2.8283 | 0.6705  | 3.2517  |
| 62  | H | -3.4065 | 1.8424  | 2.0580  |
| 63  | O | -1.0395 | 1.0679  | 1.3013  |
| 64  | O | 0.5539  | 2.4369  | 2.1419  |
| 65  | C | 1.8198  | -0.8343 | 2.1359  |
| 66  | C | 2.2276  | -1.8964 | 3.1644  |
| 67  | C | 3.7644  | -2.1382 | 3.0595  |
| 68  | H | 4.0245  | -2.8841 | 3.8195  |
| 69  | H | 4.2722  | -1.2070 | 3.3287  |
| 70  | C | 4.2373  | -2.5986 | 1.6992  |
| 71  | C | 4.3853  | -3.9581 | 1.3954  |
| 72  | H | 4.1856  | -4.7045 | 2.1598  |
| 73  | C | 1.9106  | -1.3290 | 4.5640  |
| 74  | H | 2.4559  | -0.3981 | 4.7421  |
| 75  | H | 2.1963  | -2.0556 | 5.3325  |
| 76  | H | 0.8382  | -1.1273 | 4.6687  |
| 77  | C | 1.4549  | -3.2034 | 2.9457  |
| 78  | H | 1.7869  | -3.9497 | 3.6762  |
| 79  | H | 1.6172  | -3.6040 | 1.9426  |
| 80  | H | 0.3803  | -3.0494 | 3.0804  |
| 81  | O | 0.8694  | -1.1261 | 1.3397  |
| 82  | O | 2.4491  | 0.2693  | 2.1614  |
| 83  | O | -2.2460 | -0.1800 | -1.4351 |
| 84  | C | -3.2322 | -0.6300 | -2.3782 |
| 85  | O | -3.4502 | 0.0900  | -3.3055 |
| 86  | C | -4.0207 | -1.8502 | -1.9787 |
| 87  | H | -5.0132 | -1.7187 | -2.4167 |
| 88  | H | -3.5702 | -2.7201 | -2.4671 |
| 89  | C | -4.1419 | -2.0846 | -0.4483 |
| 90  | C | -5.2560 | -3.0765 | -0.1427 |
| 91  | C | -6.2647 | -2.7332 | 0.7640  |
| 92  | C | -7.2855 | -3.6358 | 1.0668  |
| 93  | C | -7.3059 | -4.8964 | 0.4674  |
| 94  | C | -6.3001 | -5.2487 | -0.4357 |
| 95  | C | -5.2811 | -4.3451 | -0.7375 |
| 96  | H | -4.5060 | -4.6340 | -1.4423 |
| 97  | H | -6.3082 | -6.2274 | -0.9066 |
| 98  | H | -8.0996 | -5.5997 | 0.7013  |
| 99  | H | -8.0638 | -3.3526 | 1.7695  |
| 100 | H | -6.2510 | -1.7528 | 1.2328  |
| 101 | C | -2.8426 | -2.5796 | 0.1217  |
| 102 | C | -2.0590 | -1.8697 | 0.9630  |
| 103 | H | -1.1283 | -2.2692 | 1.3470  |
| 104 | H | -2.3711 | -0.9055 | 1.3517  |



|     |   |         |         |         |
|-----|---|---------|---------|---------|
| 105 | C | -1.2158 | -0.8685 | -0.9764 |
| 106 | C | -0.8179 | -2.0602 | -1.8297 |
| 107 | O | -1.1022 | -2.1238 | -3.0154 |
| 108 | O | -0.0682 | -2.9252 | -1.1674 |
| 109 | C | 0.4491  | -4.0558 | -1.9196 |
| 110 | C | 1.3482  | -4.8305 | -0.9815 |
| 111 | H | 1.7696  | -5.6936 | -1.5071 |
| 112 | H | 2.1726  | -4.2057 | -0.6289 |
| 113 | H | 0.7868  | -5.1931 | -0.1145 |
| 114 | H | -0.4008 | -4.6482 | -2.2719 |
| 115 | H | 0.9868  | -3.6697 | -2.7880 |
| 116 | H | -2.5183 | -3.5640 | -0.2111 |
| 117 | H | -4.3930 | -1.1308 | 0.0263  |

|    |      | TS3 <sub>Prod</sub> |         |         |
|----|------|---------------------|---------|---------|
|    | Atom | X                   | Y       | Z       |
| 1  | C    | -0.2505             | -2.3597 | -1.4463 |
| 2  | C    | 0.4451              | -3.2720 | -2.4586 |
| 3  | C    | 1.1616              | -4.4097 | -1.6583 |
| 4  | H    | 0.3958              | -5.1081 | -1.3054 |
| 5  | H    | 1.7919              | -4.9520 | -2.3726 |
| 6  | C    | 1.9806              | -3.9450 | -0.4754 |
| 7  | C    | 3.3108              | -3.5275 | -0.6025 |
| 8  | H    | 3.7918              | -3.5296 | -1.5755 |
| 9  | C    | 4.0218              | -3.0958 | 0.5183  |
| 10 | H    | 5.0567              | -2.7824 | 0.4097  |
| 11 | C    | 1.3897              | -3.9115 | 0.7935  |
| 12 | H    | 0.3589              | -4.2357 | 0.9014  |
| 13 | C    | -0.6205             | -3.9072 | -3.3725 |
| 14 | H    | -0.1378             | -4.5989 | -4.0715 |
| 15 | H    | -1.3650             | -4.4582 | -2.7925 |
| 16 | H    | -1.1376             | -3.1391 | -3.9589 |
| 17 | C    | 1.4525              | -2.4872 | -3.3071 |
| 18 | H    | 1.9140              | -3.1661 | -4.0332 |
| 19 | H    | 0.9517              | -1.6855 | -3.8599 |
| 20 | H    | 2.2359              | -2.0354 | -2.7011 |
| 21 | C    | -2.9651             | 0.0140  | -1.8001 |
| 22 | C    | -3.7852             | 0.4622  | -3.0115 |
| 23 | C    | -5.1719             | 0.9644  | -2.4958 |
| 24 | H    | -5.7095             | 1.3670  | -3.3620 |
| 25 | H    | -5.7344             | 0.0966  | -2.1371 |
| 26 | C    | -5.0918             | 1.9971  | -1.3954 |
| 27 | C    | -4.9830             | 3.3664  | -1.6710 |
| 28 | H    | -4.9983             | 3.7113  | -2.7013 |
| 29 | C    | -4.8744             | 4.2892  | -0.6293 |
| 30 | H    | -4.8039             | 5.3502  | -0.8526 |
| 31 | C    | -5.0981             | 1.5848  | -0.0579 |
| 32 | H    | -5.1919             | 0.5270  | 0.1661  |
| 33 | C    | -4.0060             | -0.7545 | -3.9314 |
| 34 | H    | -4.5122             | -1.5639 | -3.3992 |
| 35 | H    | -4.6201             | -0.4608 | -4.7896 |
| 36 | H    | -3.0505             | -1.1340 | -4.3112 |
| 37 | C    | -3.0558             | 1.5707  | -3.7818 |
| 38 | H    | -3.6577             | 1.8673  | -4.6479 |
| 39 | H    | -2.8895             | 2.4520  | -3.1587 |
| 40 | H    | -2.0835             | 1.2212  | -4.1417 |
| 41 | O    | 0.2219              | -1.1924 | -1.2628 |
| 42 | O    | -1.2597             | -2.8421 | -0.8325 |
| 43 | O    | -1.9058             | 0.6651  | -1.5311 |
| 44 | O    | -3.4007             | -0.9785 | -1.1303 |
| 45 | Rh   | -0.7218             | 0.0852  | 0.0376  |
| 46 | Rh   | -2.3062             | -1.6572 | 0.4820  |
| 47 | C    | -0.0912             | -1.5797 | 2.3433  |
| 48 | C    | 0.7091              | -2.0142 | 3.5742  |
| 49 | C    | 1.3626              | -3.3991 | 3.2539  |
| 50 | H    | 0.5724              | -4.1565 | 3.2712  |
| 51 | H    | 2.0500              | -3.6269 | 4.0771  |

|     |   |         |         |         |
|-----|---|---------|---------|---------|
| 52  | C | 2.0801  | -3.4645 | 1.9253  |
| 53  | C | 3.4153  | -3.0659 | 1.7755  |
| 54  | H | 3.9828  | -2.7429 | 2.6443  |
| 55  | C | -0.2552 | -2.1817 | 4.7637  |
| 56  | H | 0.2989  | -2.5350 | 5.6401  |
| 57  | H | -1.0439 | -2.9023 | 4.5344  |
| 58  | H | -0.7253 | -1.2257 | 5.0218  |
| 59  | C | 1.7817  | -0.9750 | 3.9241  |
| 60  | H | 2.3161  | -1.2960 | 4.8250  |
| 61  | H | 1.3298  | 0.0020  | 4.1220  |
| 62  | H | 2.5057  | -0.8533 | 3.1181  |
| 63  | O | 0.3427  | -0.5951 | 1.6666  |
| 64  | O | -1.1396 | -2.2507 | 2.0674  |
| 65  | C | -2.7846 | 0.7954  | 1.9586  |
| 66  | C | -3.4993 | 1.7015  | 2.9644  |
| 67  | C | -4.9368 | 1.9837  | 2.4216  |
| 68  | H | -5.4011 | 2.7065  | 3.1025  |
| 69  | H | -5.5126 | 1.0553  | 2.4891  |
| 70  | C | -4.9778 | 2.4938  | 0.9997  |
| 71  | C | -4.8705 | 3.8577  | 0.6983  |
| 72  | H | -4.7981 | 4.5833  | 1.5039  |
| 73  | C | -3.6121 | 0.9510  | 4.3058  |
| 74  | H | -4.1489 | 0.0068  | 4.1848  |
| 75  | H | -4.1510 | 1.5706  | 5.0308  |
| 76  | H | -2.6190 | 0.7344  | 4.7164  |
| 77  | C | -2.7255 | 3.0110  | 3.1655  |
| 78  | H | -3.2554 | 3.6371  | 3.8918  |
| 79  | H | -2.6269 | 3.5700  | 2.2330  |
| 80  | H | -1.7199 | 2.8149  | 3.5496  |
| 81  | O | -1.7639 | 1.2639  | 1.3606  |
| 82  | O | -3.2668 | -0.3706 | 1.7784  |
| 83  | O | 3.4024  | -0.3931 | -1.5024 |
| 84  | C | 4.6209  | -0.2871 | -2.1008 |
| 85  | O | 4.9860  | -1.1906 | -2.8185 |
| 86  | C | 5.4476  | 0.9282  | -1.7471 |
| 87  | H | 6.4852  | 0.7093  | -2.0058 |
| 88  | H | 5.1176  | 1.7719  | -2.3653 |
| 89  | C | 5.2834  | 1.2860  | -0.2518 |
| 90  | C | 6.1816  | 2.4338  | 0.1620  |
| 91  | C | 7.1664  | 2.2428  | 1.1371  |
| 92  | C | 8.0061  | 3.2911  | 1.5198  |
| 93  | C | 7.8697  | 4.5478  | 0.9284  |
| 94  | C | 6.8892  | 4.7491  | -0.0468 |
| 95  | C | 6.0528  | 3.6997  | -0.4265 |
| 96  | H | 5.2959  | 3.8706  | -1.1880 |
| 97  | H | 6.7763  | 5.7237  | -0.5131 |
| 98  | H | 8.5214  | 5.3649  | 1.2239  |
| 99  | H | 8.7647  | 3.1244  | 2.2792  |
| 100 | H | 7.2757  | 1.2656  | 1.6004  |
| 101 | C | 3.8040  | 1.5799  | -0.0123 |
| 102 | C | 2.8965  | 0.6235  | 0.6978  |
| 103 | H | 2.0561  | 1.0099  | 1.2569  |
| 104 | H | 3.3216  | -0.2992 | 1.0789  |

|     |   |         |        |         |
|-----|---|---------|--------|---------|
| 105 | C | 2.8430  | 0.6944 | -0.7998 |
| 106 | C | 1.7728  | 1.3625 | -1.5913 |
| 107 | O | 1.7760  | 1.4248 | -2.8011 |
| 108 | O | 0.8457  | 1.9754 | -0.8055 |
| 109 | C | 0.0456  | 3.0018 | -1.4916 |
| 110 | C | -0.7076 | 3.7923 | -0.4452 |
| 111 | H | -1.2887 | 4.5730 | -0.9484 |
| 112 | H | -1.3964 | 3.1557 | 0.1121  |
| 113 | H | -0.0185 | 4.2731 | 0.2574  |
| 114 | H | 0.7444  | 3.6226 | -2.0566 |
| 115 | H | -0.6253 | 2.4930 | -2.1811 |
| 116 | H | 3.5345  | 2.6313 | 0.0280  |
| 117 | H | 5.5683  | 0.4051 | 0.3342  |

| <b>Rh(oac)<sub>4</sub>C(COOMe)(Ph)</b> |      |         |         |         |
|----------------------------------------|------|---------|---------|---------|
|                                        | Atom | X       | Y       | Z       |
| 1                                      | C    | 1.9351  | 0.5756  | -0.2147 |
| 2                                      | C    | 3.0762  | -0.2745 | -0.1444 |
| 3                                      | C    | 2.9337  | -1.6557 | 0.1665  |
| 4                                      | C    | 4.0494  | -2.4746 | 0.2552  |
| 5                                      | C    | 5.3252  | -1.9484 | 0.0219  |
| 6                                      | C    | 5.4936  | -0.5922 | -0.2919 |
| 7                                      | C    | 4.3881  | 0.2376  | -0.3656 |
| 8                                      | H    | 1.9444  | -2.0493 | 0.3451  |
| 9                                      | H    | 3.9331  | -3.5249 | 0.5022  |
| 10                                     | H    | 6.1946  | -2.5959 | 0.0862  |
| 11                                     | H    | 6.4869  | -0.1945 | -0.4714 |
| 12                                     | H    | 4.5185  | 1.2861  | -0.6115 |
| 13                                     | C    | 2.1735  | 2.0235  | -0.4194 |
| 14                                     | O    | 2.1602  | 2.5484  | -1.5192 |
| 15                                     | O    | 2.3607  | 2.6686  | 0.7382  |
| 16                                     | C    | 2.4194  | 4.1089  | 0.6556  |
| 17                                     | H    | 1.4796  | 4.4955  | 0.2553  |
| 18                                     | H    | 3.2499  | 4.4201  | 0.0186  |
| 19                                     | H    | 2.5701  | 4.4496  | 1.6785  |
| 20                                     | Rh   | -0.0056 | 0.0751  | -0.0779 |
| 21                                     | O    | -0.5389 | 1.0307  | -1.8255 |
| 22                                     | C    | -1.7565 | 1.0345  | -2.2130 |
| 23                                     | C    | -2.0466 | 1.8078  | -3.4760 |
| 24                                     | O    | -0.4601 | 1.7967  | 0.9660  |
| 25                                     | C    | -1.6578 | 2.0084  | 1.3594  |
| 26                                     | O    | -2.6502 | 1.2396  | 1.1773  |
| 27                                     | Rh   | -2.3818 | -0.5295 | 0.1454  |
| 28                                     | O    | -1.8962 | -1.4936 | 1.9057  |
| 29                                     | C    | -0.6896 | -1.5008 | 2.2939  |
| 30                                     | C    | -0.3551 | -2.2348 | 3.5693  |
| 31                                     | O    | 0.2266  | -1.6802 | -1.1403 |
| 32                                     | C    | -0.7763 | -2.4524 | -1.3277 |
| 33                                     | C    | -0.5077 | -3.6978 | -2.1362 |
| 34                                     | O    | 0.2946  | -0.9424 | 1.6964  |
| 35                                     | C    | -1.8824 | 3.2852  | 2.1323  |
| 36                                     | O    | -1.9568 | -2.2538 | -0.9101 |
| 37                                     | O    | -2.7289 | 0.4695  | -1.6245 |
| 38                                     | H    | -2.0195 | 2.8796  | -3.2493 |
| 39                                     | H    | -3.0329 | 1.5508  | -3.8652 |
| 40                                     | H    | -1.2771 | 1.6064  | -4.2254 |
| 41                                     | H    | -2.9474 | 3.5119  | 2.1989  |
| 42                                     | H    | -1.3467 | 4.1104  | 1.6563  |
| 43                                     | H    | -1.4789 | 3.1637  | 3.1439  |
| 44                                     | H    | 0.3911  | -4.1971 | -1.7638 |
| 45                                     | H    | -1.3611 | -4.3758 | -2.0944 |
| 46                                     | H    | -0.3221 | -3.4140 | -3.1779 |
| 47                                     | H    | -1.2605 | -2.6149 | 4.0438  |
| 48                                     | H    | 0.3173  | -3.0684 | 3.3408  |
| 49                                     | H    | 0.1722  | -1.5632 | 4.2532  |

| <b>Rh(oac)<sub>4</sub>C(COOMe)(OCOMe)</b> |      |         |         |         |
|-------------------------------------------|------|---------|---------|---------|
|                                           | Atom | X       | Y       | Z       |
| 1                                         | C    | 0.8637  | 2.3377  | 1.1923  |
| 2                                         | C    | 0.6905  | 3.6931  | 1.8322  |
| 3                                         | C    | 1.1321  | 1.2058  | -2.3358 |
| 4                                         | C    | 1.1005  | 1.9329  | -3.6576 |
| 5                                         | H    | 1.6467  | 4.0741  | 2.1928  |
| 6                                         | H    | -0.0246 | 3.6256  | 2.6568  |
| 7                                         | H    | 0.2791  | 4.3877  | 1.0916  |
| 8                                         | H    | 0.4359  | 1.4156  | -4.3543 |
| 9                                         | H    | 2.1044  | 2.0090  | -4.0775 |
| 10                                        | H    | 0.6999  | 2.9405  | -3.4998 |
| 11                                        | O    | -0.2160 | 1.7198  | 0.8930  |
| 12                                        | O    | 2.0427  | 1.9189  | 0.9862  |
| 13                                        | O    | 0.0001  | 0.8314  | -1.8739 |
| 14                                        | O    | 0.0114  | -1.0614 | 1.7902  |
| 15                                        | Rh   | -0.1126 | -0.1173 | -0.0403 |
| 16                                        | Rh   | 2.3300  | 0.0935  | 0.0553  |
| 17                                        | O    | 0.1657  | -1.9354 | -0.9730 |
| 18                                        | O    | 2.2576  | 1.0359  | -1.7759 |
| 19                                        | C    | 1.1496  | -1.2317 | 2.3498  |
| 20                                        | O    | 2.4276  | -1.7420 | -0.8893 |
| 21                                        | O    | 2.2684  | -0.8584 | 1.8851  |
| 22                                        | C    | 1.3561  | -2.3533 | -1.1866 |
| 23                                        | C    | 1.1343  | -1.9598 | 3.6709  |
| 24                                        | C    | 1.4758  | -3.7144 | -1.8278 |
| 25                                        | H    | 2.1110  | -1.8997 | 4.1530  |
| 26                                        | H    | 0.3647  | -1.5358 | 4.3215  |
| 27                                        | H    | 0.8812  | -3.0114 | 3.4969  |
| 28                                        | H    | 0.7273  | -3.8279 | -2.6157 |
| 29                                        | H    | 2.4785  | -3.8608 | -2.2321 |
| 30                                        | H    | 1.2835  | -4.4813 | -1.0687 |
| 31                                        | C    | -2.0867 | -0.2715 | -0.0633 |
| 32                                        | C    | -2.9093 | 0.9290  | 0.3328  |
| 33                                        | O    | -3.2991 | 1.0285  | 1.4801  |
| 34                                        | O    | -2.9644 | 1.8541  | -0.6136 |
| 35                                        | C    | -3.5492 | 3.1189  | -0.2230 |
| 36                                        | H    | -2.9534 | 3.5651  | 0.5756  |
| 37                                        | H    | -4.5771 | 2.9693  | 0.1125  |
| 38                                        | H    | -3.5204 | 3.7352  | -1.1194 |
| 39                                        | O    | -2.6803 | -1.4243 | -0.2096 |
| 40                                        | C    | -4.1345 | -1.5568 | -0.2915 |
| 41                                        | O    | -4.8105 | -0.6091 | -0.5443 |
| 42                                        | C    | -4.4956 | -2.9802 | -0.0543 |
| 43                                        | H    | -5.5734 | -3.1054 | -0.1536 |
| 44                                        | H    | -3.9674 | -3.6169 | -0.7710 |
| 45                                        | H    | -4.1681 | -3.2728 | 0.9492  |

|    |      | <b>[Rh(oac)<sub>4</sub>C(COOMe)(IAr)]<sup>+</sup></b> |         |         |
|----|------|-------------------------------------------------------|---------|---------|
|    | Atom | X                                                     | Y       | Z       |
| 1  | Rh   | 0.9969                                                | 0.0698  | -0.1772 |
| 2  | O    | -0.5649                                               | -1.0344 | 0.5598  |
| 3  | C    | -0.3349                                               | -2.1357 | 1.1749  |
| 4  | C    | -1.5511                                               | -2.9072 | 1.6119  |
| 5  | O    | 2.6716                                                | 1.0657  | -0.8345 |
| 6  | C    | 3.8341                                                | 0.6239  | -0.5219 |
| 7  | O    | 4.0659                                                | -0.4237 | 0.1539  |
| 8  | Rh   | 2.4916                                                | -1.5710 | 0.8218  |
| 9  | O    | 2.4584                                                | -2.5721 | -0.9718 |
| 10 | C    | 1.7547                                                | -2.1261 | -1.9257 |
| 11 | C    | 1.7626                                                | -2.8600 | -3.2377 |
| 12 | O    | 1.1086                                                | 1.0146  | 1.6664  |
| 13 | C    | 1.7988                                                | 0.5331  | 2.6318  |
| 14 | C    | 1.7798                                                | 1.3228  | 3.9130  |
| 15 | O    | 1.0332                                                | -1.0666 | -1.8713 |
| 16 | C    | 5.0022                                                | 1.4330  | -1.0183 |
| 17 | O    | 2.4838                                                | -0.5312 | 2.5853  |
| 18 | O    | 0.8135                                                | -2.6108 | 1.4232  |
| 19 | H    | 2.2208                                                | 2.3087  | 3.7346  |
| 20 | H    | 2.1717                                                | -3.8629 | -3.1099 |
| 21 | H    | 2.3852                                                | -2.3055 | -3.9485 |
| 22 | H    | 0.7503                                                | -2.9091 | -3.6457 |
| 23 | H    | -2.1942                                               | -2.2645 | 2.2204  |
| 24 | H    | -1.2624                                               | -3.7926 | 2.1787  |
| 25 | H    | -2.1227                                               | -3.2018 | 0.7260  |
| 26 | H    | 5.9402                                                | 1.0197  | -0.6469 |
| 27 | H    | 5.0040                                                | 1.4282  | -2.1131 |
| 28 | H    | 4.8923                                                | 2.4713  | -0.6912 |
| 29 | H    | 0.7452                                                | 1.4738  | 4.2346  |
| 30 | H    | 2.3416                                                | 0.8023  | 4.6891  |
| 31 | C    | -3.4621                                               | -2.4066 | -2.2739 |
| 32 | C    | -4.2053                                               | -1.9416 | -1.1914 |
| 33 | C    | -3.8735                                               | -0.7302 | -0.5644 |
| 34 | C    | -2.7720                                               | -0.0387 | -1.0656 |
| 35 | C    | -2.0268                                               | -0.4531 | -2.1520 |
| 36 | C    | -2.3856                                               | -1.6628 | -2.7570 |
| 37 | C    | -4.6830                                               | -0.1856 | 0.5539  |
| 38 | O    | -5.5761                                               | -1.0426 | 1.0249  |
| 39 | C    | -6.4241                                               | -0.5662 | 2.0972  |
| 40 | I    | -2.1506                                               | 1.7945  | -0.0607 |
| 41 | C    | -0.0753                                               | 1.5850  | -0.6828 |
| 42 | C    | 0.4984                                                | 2.8895  | -1.1180 |
| 43 | O    | 0.4479                                                | 3.1383  | -2.3087 |
| 44 | O    | 1.0492                                                | 3.6145  | -0.1644 |
| 45 | C    | 1.7576                                                | 4.8100  | -0.5941 |
| 46 | O    | -4.5348                                               | 0.9549  | 0.9851  |
| 47 | H    | -1.1754                                               | 0.1087  | -2.5130 |
| 48 | H    | -1.8137                                               | -2.0115 | -3.6102 |
| 49 | H    | -3.7330                                               | -3.3432 | -2.7487 |
| 50 | H    | -5.0573                                               | -2.4992 | -0.8218 |
| 51 | H    | -6.9998                                               | 0.2972  | 1.7592  |

|    |   |         |         |         |
|----|---|---------|---------|---------|
| 52 | H | -5.8126 | -0.2936 | 2.9591  |
| 53 | H | 1.0742  | 5.4769  | -1.1216 |
| 54 | H | 2.5873  | 4.5236  | -1.2425 |
| 55 | H | 2.1191  | 5.2665  | 0.3244  |
| 56 | H | -7.0785 | -1.4028 | 2.3329  |



|    |      | <b>Rh(oac)<sub>4</sub>C(COOMe)(IAr.PF<sub>6</sub>)</b> |         |         |
|----|------|--------------------------------------------------------|---------|---------|
|    | Atom | X                                                      | Y       | Z       |
| 1  | C    | -0.4478                                                | -0.4369 | -1.1884 |
| 2  | C    | -1.0953                                                | -1.5421 | -1.9464 |
| 3  | C    | -1.8884                                                | -3.7450 | -2.0294 |
| 4  | H    | -2.8764                                                | -3.4094 | -2.3434 |
| 5  | H    | -1.2803                                                | -4.0308 | -2.8893 |
| 6  | O    | -1.2361                                                | -2.6752 | -1.3005 |
| 7  | O    | -1.3423                                                | -1.3159 | -3.1212 |
| 8  | I    | -1.8569                                                | 1.1509  | -0.7515 |
| 9  | C    | -0.4172                                                | 2.6684  | -1.2663 |
| 10 | C    | -0.3609                                                | 3.8530  | -0.5266 |
| 11 | C    | 0.4423                                                 | 2.4011  | -2.3181 |
| 12 | C    | 0.6383                                                 | 4.7804  | -0.8518 |
| 13 | C    | 1.4232                                                 | 3.3485  | -2.6313 |
| 14 | H    | 0.3816                                                 | 1.4743  | -2.8746 |
| 15 | C    | 1.5265                                                 | 4.5280  | -1.8963 |
| 16 | H    | 0.6960                                                 | 5.7032  | -0.2870 |
| 17 | H    | 2.1036                                                 | 3.1490  | -3.4522 |
| 18 | H    | 2.2893                                                 | 5.2590  | -2.1420 |
| 19 | C    | -1.3552                                                | 4.1312  | 0.5393  |
| 20 | O    | -2.4080                                                | 3.5133  | 0.6461  |
| 21 | O    | -0.9860                                                | 5.1125  | 1.3581  |
| 22 | C    | -1.9184                                                | 5.4491  | 2.4112  |
| 23 | H    | -2.8676                                                | 5.7720  | 1.9799  |
| 24 | H    | -2.0788                                                | 4.5822  | 3.0549  |
| 25 | H    | -1.4448                                                | 6.2598  | 2.9613  |
| 26 | P    | -4.2648                                                | -1.5414 | 0.4406  |
| 27 | F    | -5.7235                                                | -1.7395 | -0.2455 |
| 28 | F    | -3.6370                                                | -1.1503 | -1.0545 |
| 29 | F    | -2.7733                                                | -1.3100 | 1.0896  |
| 30 | F    | -4.5805                                                | 0.0528  | 0.6718  |
| 31 | F    | -3.9012                                                | -3.1047 | 0.1669  |
| 32 | F    | -4.8623                                                | -1.8984 | 1.9063  |
| 33 | H    | -1.9704                                                | -4.5594 | -1.3142 |
| 34 | C    | 1.6204                                                 | 1.4019  | 1.8761  |
| 35 | C    | 1.2398                                                 | 2.6329  | 2.6550  |
| 36 | C    | 3.7682                                                 | 0.6277  | -1.0833 |
| 37 | C    | 4.6269                                                 | 1.4896  | -1.9684 |
| 38 | O    | 0.8778                                                 | 1.1255  | 0.8694  |
| 39 | O    | 2.6241                                                 | 0.7273  | 2.2555  |
| 40 | O    | 2.5458                                                 | 0.4897  | -1.4408 |
| 41 | O    | 4.2853                                                 | 0.1162  | -0.0453 |
| 42 | Rh   | 1.2397                                                 | -0.5528 | -0.2635 |
| 43 | Rh   | 3.1168                                                 | -0.9934 | 1.2339  |
| 44 | C    | 0.6797                                                 | -2.1618 | 2.1490  |
| 45 | C    | -0.2576                                                | -2.9520 | 3.0229  |
| 46 | O    | 0.1580                                                 | -1.6469 | 1.1047  |
| 47 | O    | 1.9014                                                 | -2.0726 | 2.4842  |
| 48 | C    | 2.7402                                                 | -2.9647 | -0.8710 |
| 49 | C    | 3.0097                                                 | -4.2349 | -1.6336 |
| 50 | O    | 1.7540                                                 | -2.2594 | -1.2841 |
| 51 | O    | 3.4799                                                 | -2.6913 | 0.1229  |
| 52 | H    | 2.2414                                                 | -4.9711 | -1.3722 |
| 53 | H    | 2.9424                                                 | -4.0483 | -2.7082 |
| 54 | H    | -0.1030                                                | -4.0193 | 2.8273  |
| 55 | H    | -1.2906                                                | -2.6927 | 2.7877  |
| 56 | H    | 1.2278                                                 | 3.5006  | 1.9897  |
| 57 | H    | 1.9394                                                 | 2.8011  | 3.4741  |
| 58 | H    | 4.4396                                                 | 1.2530  | -3.0186 |

|    |   |         |         |         |
|----|---|---------|---------|---------|
| 59 | H | 4.3534  | 2.5382  | -1.8064 |
| 60 | H | -0.0355 | -2.7642 | 4.0761  |
| 61 | H | 0.2276  | 2.5061  | 3.0525  |
| 62 | H | 3.9914  | -4.6349 | -1.3769 |
| 63 | H | 5.6819  | 1.3521  | -1.7288 |

## 11. References

1. Song, Z. J., Thompson, A. S., Zhao, M., DeMarco, A., Reamer, R. A., Huntington, M. F., Grabowski, E. J., Reider, P. J., Nelson, T. D. Rhodium-carbenoid-mediated intermolecular O–H insertion reactions: a dramatic additive effect. Application in the synthesis of an ascomycin derivative. *Tetrahedron Lett.* **2000**, *41*, 1877-1881.
2. Guptill, D. M.; Cohen, C. M.; Davies, H. M. L. Rhodium(II)-catalyzed stereoselective synthesis of allylsilanes. *Org. Lett.* **2013**, *15*, 6120-6123.
3. Wang, Z.; Herraiz, A. G.; Del Hoyo, A. M.; Suero, M. G. Generating carbyne equivalents with photoredox catalysis. *Nature* **2018**, *554*, 86-91.
4. Weiss, R.; Seubert, J.; Hampel, F.  $\alpha$ -Aryliodonio diazo compounds:  $S_N$  reactions at the  $\alpha$ -C atom as a novel reaction type for diazo compounds. *Angew. Chem. Int. Ed.* **1994**, *33*, 1952-1953.
5. Schnaars, C.; Hennen, M.; Bonge-Hansen, T. Nucleophilic Halogenations of Diazo Compounds, a Complementary Principle for the Synthesis of Halodiazo Compounds: Experimental and Theoretical Studies. *J. Org. Chem.* **2013**, *78*, 7488– 7497.
6. Heuger, G.; Kalsow, S.; Göttlich R. Copper (I) Catalysts for the Stereoselective Addition of N-Chloroamines to Double Bonds: A Diastereoselective Radical Cyclisation. *Eur. J. Org. Chem.* **2002**, 1848-1854.
7. Wzorek, A.; Gawdzik, B.; Gładkowski, W.; Urbaniak, M.; Barańska, A.; Malińska, M.; Woźniak, K.; Kempieńska, K.; Wietrzyk, J. Synthesis, Characterization and Antiproliferative Activity of  $\beta$ -Aryl- $\delta$ -Iodo- $\gamma$ -Lactones. *J. Mol. Struct.* **2013**, *1047*, 160–168.

8. McCourt, R. O.; Dénès, F.; Sanchez-Sanz, G.; Scanlan, E. M. Rapid Access to Thiolactone Derivatives through Radical-Mediated Acyl Thiol–Ene and Acyl Thiol–Yne Cyclization. *Org. Lett.* **2018**, *20*, 2948–2951.
9. O’Duill, M. L.; Matsuura, R.; Wang, Y.; Turnbull, J. L.; Gurak, J. A.; Gao, D.-W.; Lu, G.; Liu, P.; Engle, K. M. Tridentate Directing Groups Stabilize 6-Membered Palladacycles in Catalytic Alkene Hydrofunctionalization. *J. Am. Chem. Soc.* **2017**, *139*, 15576–15579.
10. Brimiouille, R.; Bauer, A.; Bach, T. Enantioselective Lewis Acid Catalysis in Intramolecular [2 + 2] Photocycloaddition Reactions: A Mechanistic Comparison between Representative Coumarin and Enone Substrates. *J. Am. Chem. Soc.* **2015**, *137*, 5170–5176.
11. Jeon, J.; Lee, C.; Seo, H.; Hong, S. NiH-Catalyzed Proximal-Selective Hydroamination of Unactivated Alkenes. *J. Am. Chem. Soc.* **2020**, *142*, 20470–20480.
12. Noten, E. A.; McAtee, R. C.; Stephenson, C. R. J. Catalytic Intramolecular Aminoarylation of Unactivated Alkenes with Aryl Sulfonamides. *Chem. Sci.* **2022**, *13*, 6942–6949.
13. Tomioka, K.; Kawasaki, H.; Yasuda, K.; Koga, K. A Model for the Diastereofacial Differentiation in the Alkylation of Endocyclic Enolate. *J. Am. Chem. Soc.* **1988**, *110*, 3597–3601.
14. Sekiguchi, Y.; Yoshikai, N. Zinc-Catalyzed  $\beta$ -Functionalization of Cyclopropanols via Enolized Homoenate. *J. Am. Chem. Soc.* **2021**, *143*, 18400–18405.
15. Gaussian 16, Revision A.03, Frisch, M. J.; Trucks, G. W.; Schlegel, H. B.; Scuseria, G. E.; Robb, M. A.; Cheeseman, J. R.; Scalmani, G.; Barone, V.; Petersson, G. A.; Nakatsuji, H.; Li, X.; Caricato, M.; Marenich, A. V.; Bloino, J.; Janesko, B. G.; Gomperts, R.; Mennucci, B.; Hratchian, H. P.; Ortiz, J. V.; Izmaylov, A. F.; Sonnenberg, J. L.; Williams-Young, D.; Ding, F.; Lipparini, F.; Egidi, F.; Goings, J.; Peng, B.; Petrone, A.; Henderson, T.; Ranasinghe, D.; Zakrzewski, V. G.; Gao, J.; Rega, N.; Zheng, G.; Liang, W.; Hada, M.; Ehara, M.; Toyota, K.; Fukuda, R.; Hasegawa, J.; Ishida, M.; Nakajima, T.; Honda, Y.; Kitao, O.; Nakai, H.; Vreven, T.; Throssell, K.; Montgomery, J. A., Jr.; Peralta, J. E.; Ogliaro, F.; Bearpark, M. J.; Heyd, J. J.; Brothers, E. N.; Kudin, K. N.; Staroverov, V. N.; Keith, T. A.; Kobayashi, R.; Normand, J.; Raghavachari, K.; Rendell, A. P.; Burant, J. C.; Iyengar, S. S.; Tomasi, J.; Cossi, M.; Millam, J. M.;

Klene, M.; Adamo, C.; Cammi, R.; Ochterski, J. W.; Martin, R. L.; Morokuma, K.; Farkas, O.; Foresman, J. B.; Fox, D. J. Gaussian, Inc., Wallingford CT, **2016**.

16. (a) Lee, C.; Yang, W.; Parr, R.G., Development of the Colle-Salvetti Correlation-Energy Formula into a Functional of the Electron Density. *Phys. Rev. B* **1988**, *37*, 785. (b) Beck, A.D., Density-Functional Thermochemistry. III. The Role of Exact Exchange. *J. Chem. Phys.* **1993**, *98*, 5648.

17. (a) Grimme, S.; Antony, J.; Ehrlich, S.; Krieg, H. A Consistent and Accurate Ab initio Parametrization of Density Functional Dispersion Correction (DFT-D) for the 94 Elements H-Pu. *J. Chem. Phys.* **2010**, *132*, 154104. (b) Grimme, S.; Ehrlich, S.; Goerigk, L. Effect of the Damping Function in Dispersion Corrected Density Functional Theory. *J. Comput. Chem.* **2011**, *32*, 1456–1465.

18. Dolg, M.; Wedig, U.; Stoll, H.; Preuss, H.; Energy-Adjusted Abinitio Pseudopotentials for the First Row Transition Elements. *J. Chem. Phys.* **1987**, *86*, 866–872.

19. (a) Ditchfield, R.H.W.J.; Hehre, W.J.; Pople, J.A.; Self-Consistent Molecular-Orbital Methods. IX. An Extended Gaussian-Type Basis for Molecular-Orbital Studies of Organic Molecules. *J. Chem. Phys.* **1971**, *54*, 724. (b) Hehre, W.J.; Ditchfield, R.; Pople, J.A., Type Basis Sets for Use in Molecular Orbital Studies of Organic Molecules. *J. Chem. Phys.* **1972**, *56*, 1972, 2257. (c) Hariharan, P.C.; Pople, J.A., The Influence of Polarization Functions on Molecular Orbital Hydrogenation Energies. *Theor. Chem. Acc.* **1973**, *28*, 213–222.

20. (a) Miertuš, S.; Scrocco, E.; Tomasi, J. Electrostatic Interaction of a Solute with a Continuum. A Direct Utilization of Ab-initio Molecular Potentials for the Prevision of Solvent Effects. *Chem. Phys.* **1981**, *55*, 117–129. (b) Miertuš, S.; Tomasi, J. Approximate Evaluations of the Electrostatic Free Energy and Internal Energy Changes in Solution Processes. *Chem. Phys.* **1982**, *65*, 239–245. (c) Pascual-Ahuir, J. L.; Silla, E.; Tuñón, I. GEPO: An Improved Description of Molecular Surfaces. III. A new algorithm for the computation of a solvent-excluding surface. *J. Comput. Chem.* **1994**, *15*, 1127–1138.

21. Fukui, K., The Path of Chemical Reactions- The IRC Approach. *Acc. Chem. Res.* **1981**, *14*, 363–368.

22. (a) Peterson, K.A.; Figgen, D.; Dolg, M.; Stoll, H. Energy-consistent relativistic pseudopotentials and correlation consistent basis sets for the 4d elements Y–Pd. *J. Chem. Phys.* **2007**, *126*, 124101. (b) Peterson,

K.A.; Shepler, B.C.; Figgen, D.; Stoll, H. On the Spectroscopic and Thermochemical Properties of ClO, BrO, IO, and Their Anions. *J. Phys. Chem. A* **2006**, *110*, 13877–13883.

23. <https://www.tc.uni-koeln.de/PP/clickpse.en.html>

24. (a) Dunning Jr., T. H. Gaussian basis sets for use in correlated molecular calculations. I. The atoms boron through neon and hydrogen. *J. Chem. Phys.* **1989**, *90*, 1007–1023. (b) Davidson, E. R. Comment on ‘Comment on Dunning’s correlation-consistent basis sets. *Chem. Phys. Lett.* **1996**, *260*, 514–518.

25. (a) Grimme, S., Supramolecular Binding Thermodynamics by Dispersion-Corrected Density Functional Theory. *Chem. Eur. J.* **2012**, *18*, 9955–9964. (b) Luchini, G.; Alegre-Requena, J.V.; Funes-Ardoiz, I.; Paton, R.S., GoodVibes: Automated Thermochemistry for Heterogeneous Computational Chemistry Data. *F1000Research*. **2020**, *9*, 291.

26. (a) Weigend, F.; Ahlrichs, R., Balanced Basis Sets of Split Valence, Triple Zeta Valence and Quadruple Zeta Valence Quality for H to Rn: Design and Assessment of Accuracy. *Phys. Chem. Chem. Phys.* **2005**, *7*, 3297–3305. (b) Weigend, F., Accurate Coulomb-Fitting Basis Sets for H to Rn. *Phys. Chem. Chem. Phys.* **2006**, *8*, 1057–1065.

27. (a) Dapprich, S.; Frenking, G. Investigation of Donor-Acceptor Interactions: A Charge Decomposition Analysis Using Fragment Molecular Orbitals. *J. Phys. Chem.* **1995**, *99*, 9352–9362. (b) Dapprich, S.; Frenking, G. Investigation of Donor-Acceptor Interactions: A Charge Decomposition Analysis Using Fragment Molecular Orbitals. *J. Phys. Chem.* 1995, *99*, 9352–9362.

28. Lu, T.; Chen, F. Multiwfn: A multifunctional wavefunction analyser. *J. Comput. Chem.* **2012**, *33*, 580–592.

29. Parr, R. G.; Szentpály, L. v.; Liu, S. Electrophilicity Index. *J. Am. Chem. Soc.* **1999**, *121*, 1922–1924.

30. PyMOL(TM) Molecular Graphics System, Version 2.4.0.

## 12. NMR Spectra

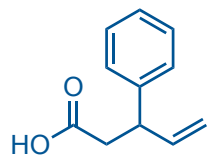

$^1\text{H}$  NMR of 1a (300 MHz,  $\text{CDCl}_3$ )

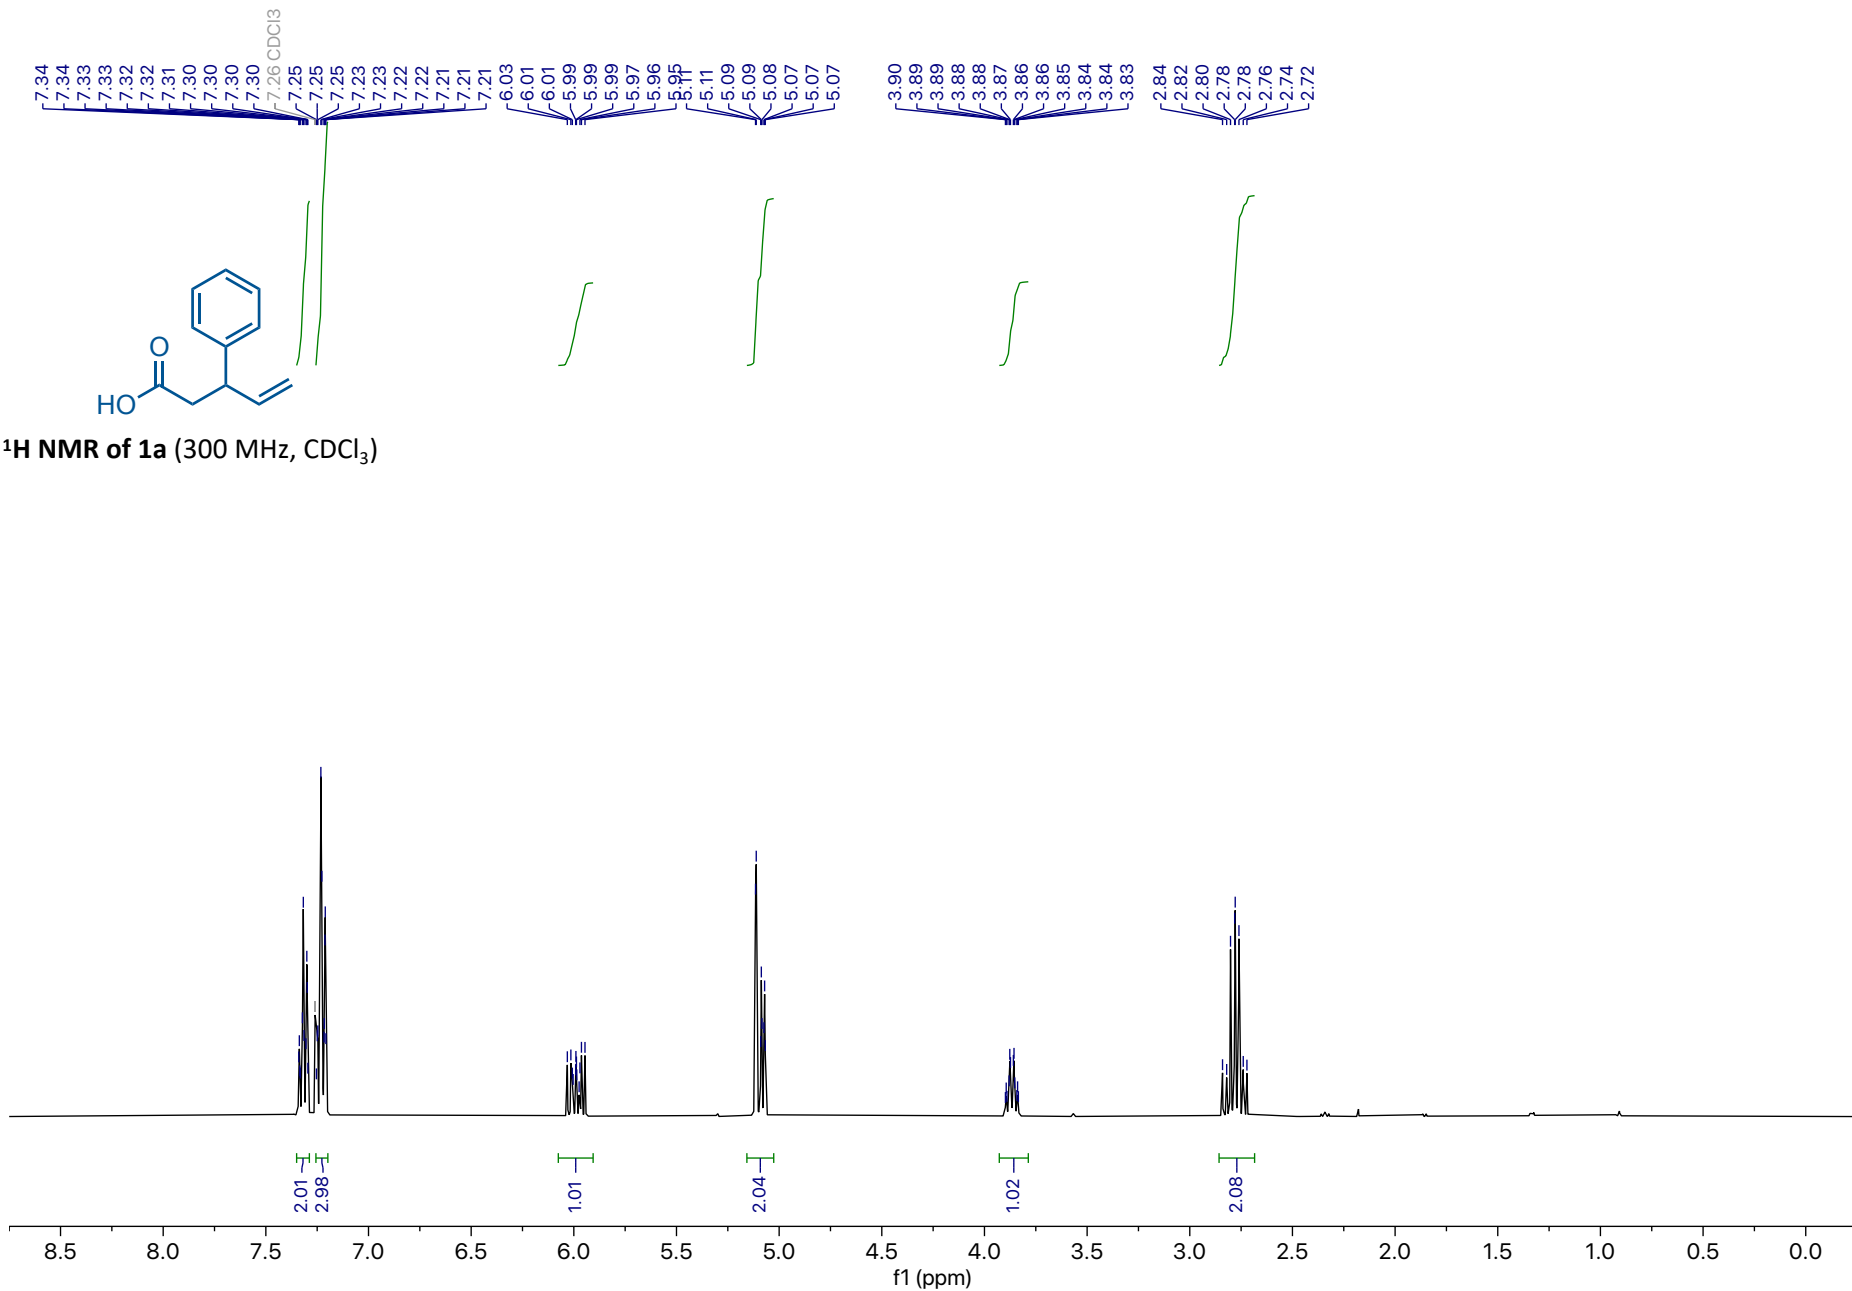

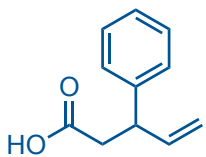

<sup>13</sup>C NMR of 1a (101 MHz, CDCl<sub>3</sub>)

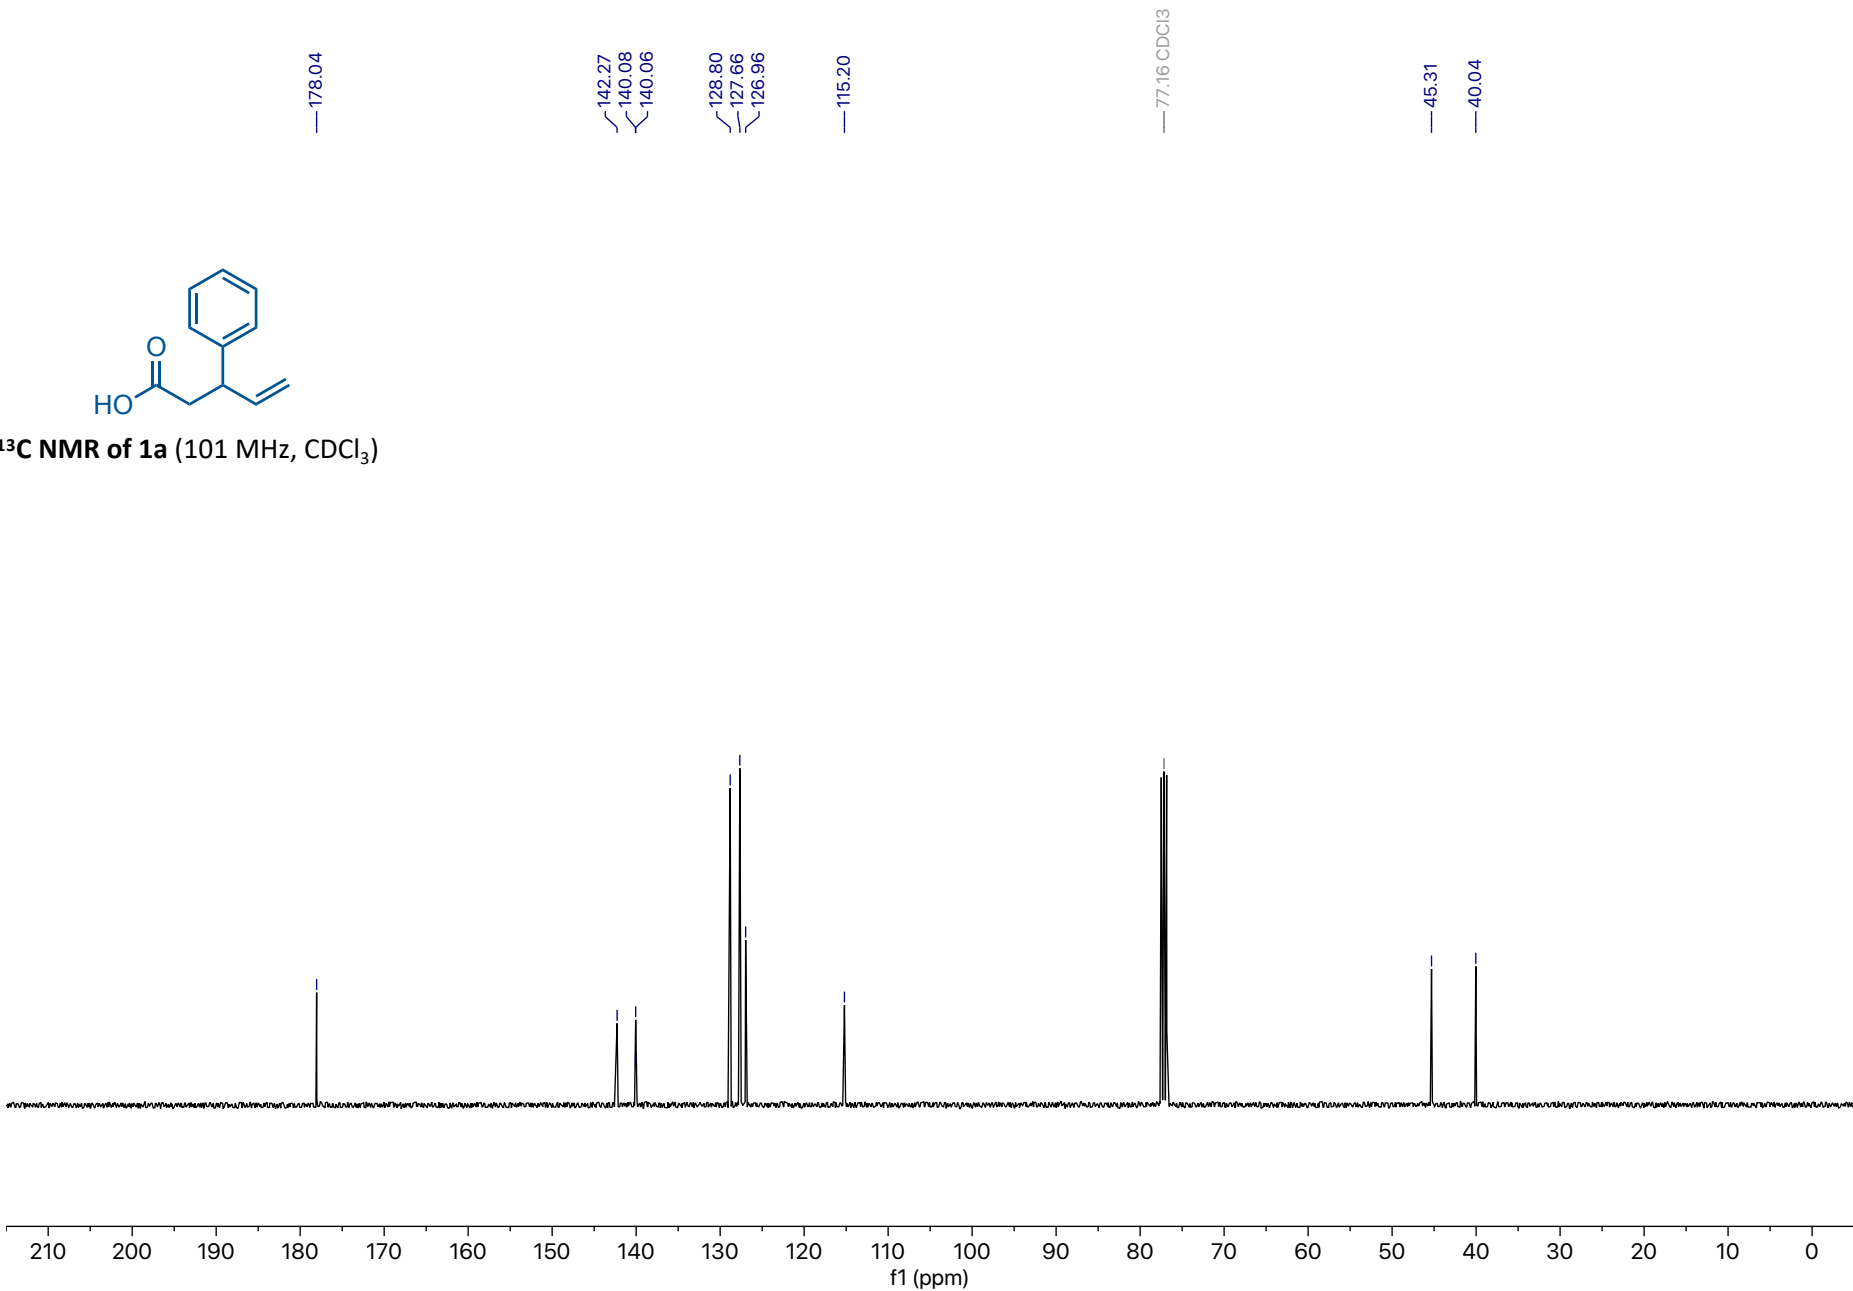

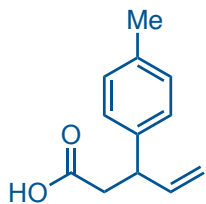

<sup>1</sup>H NMR of 1b (300 MHz, CDCl<sub>3</sub>)

7.26 CDCl<sub>3</sub>  
7.15  
7.14  
7.13  
7.12  
7.12  
7.11  
7.10  
7.10  
7.09  
7.09

6.01  
5.99  
5.99  
5.98  
5.97  
5.96  
5.95  
5.94  
5.93  
5.10  
5.10  
5.09  
5.09  
5.09  
5.08  
5.07  
5.06  
5.06  
5.05

3.85  
3.84  
3.82  
3.80

2.82  
2.80  
2.78  
2.76  
2.75  
2.74  
2.71  
2.70  
2.32

4.09

0.95

1.88

0.98

1.98

3.08

8.5 8.0 7.5 7.0 6.5 6.0 5.5 5.0 4.5 4.0 3.5 3.0 2.5 2.0 1.5 1.0 0.5 0.0

f1 (ppm)





<sup>13</sup>C NMR of 1b (101 MHz, CDCl<sub>3</sub>)

— 177.75

— 140.30

— 139.27

— 136.52

— 129.48

— 127.51

— 114.95

— 77.16 CDCl<sub>3</sub>

— 44.94

— 40.04

— 21.16

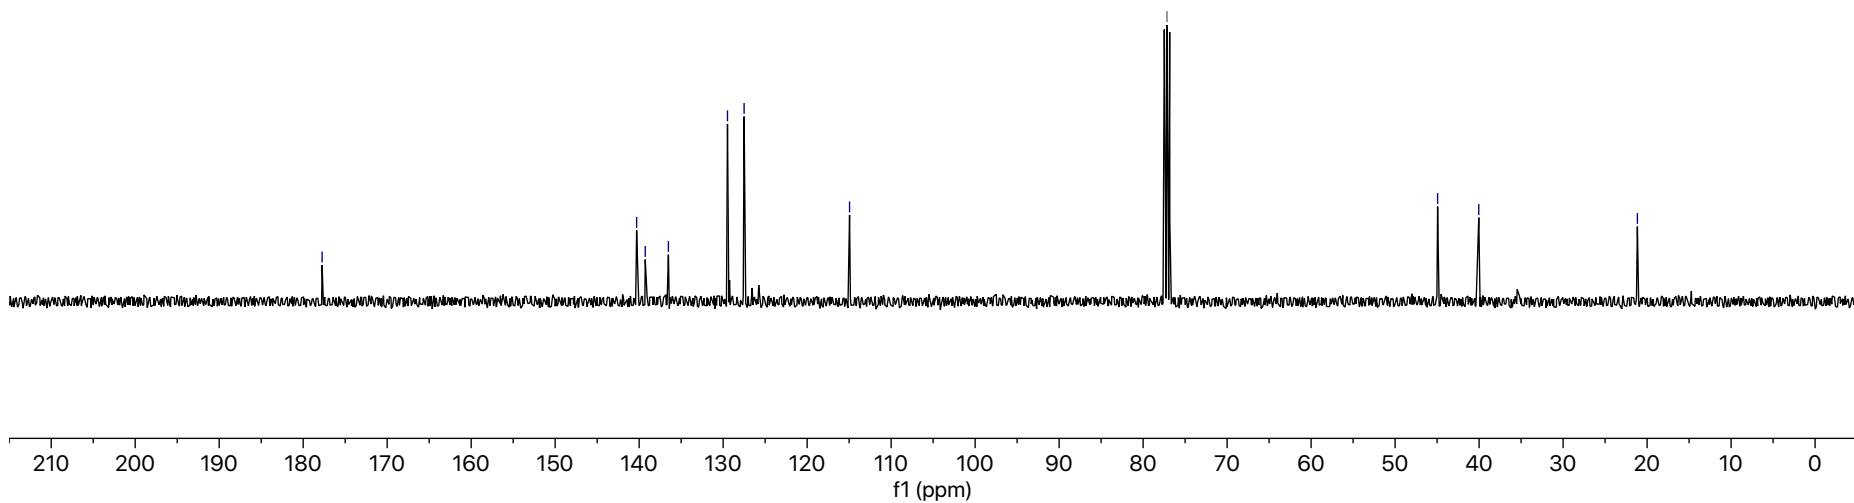

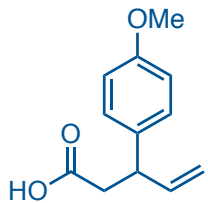

$^1\text{H}$  NMR of **1c** (300 MHz,  $\text{CDCl}_3$ )

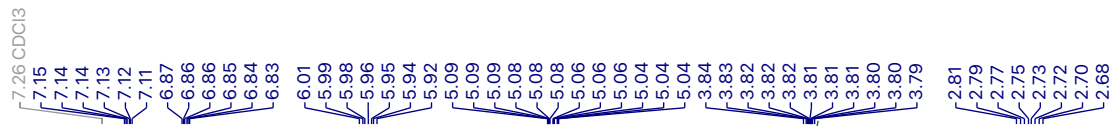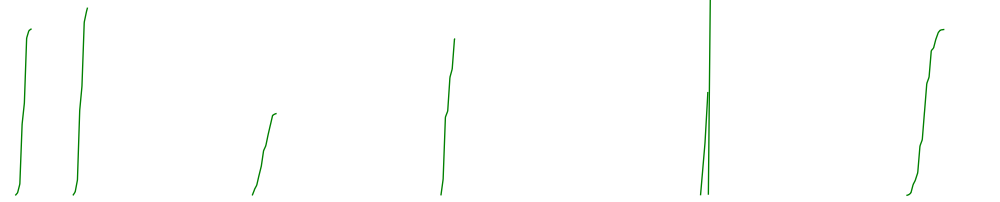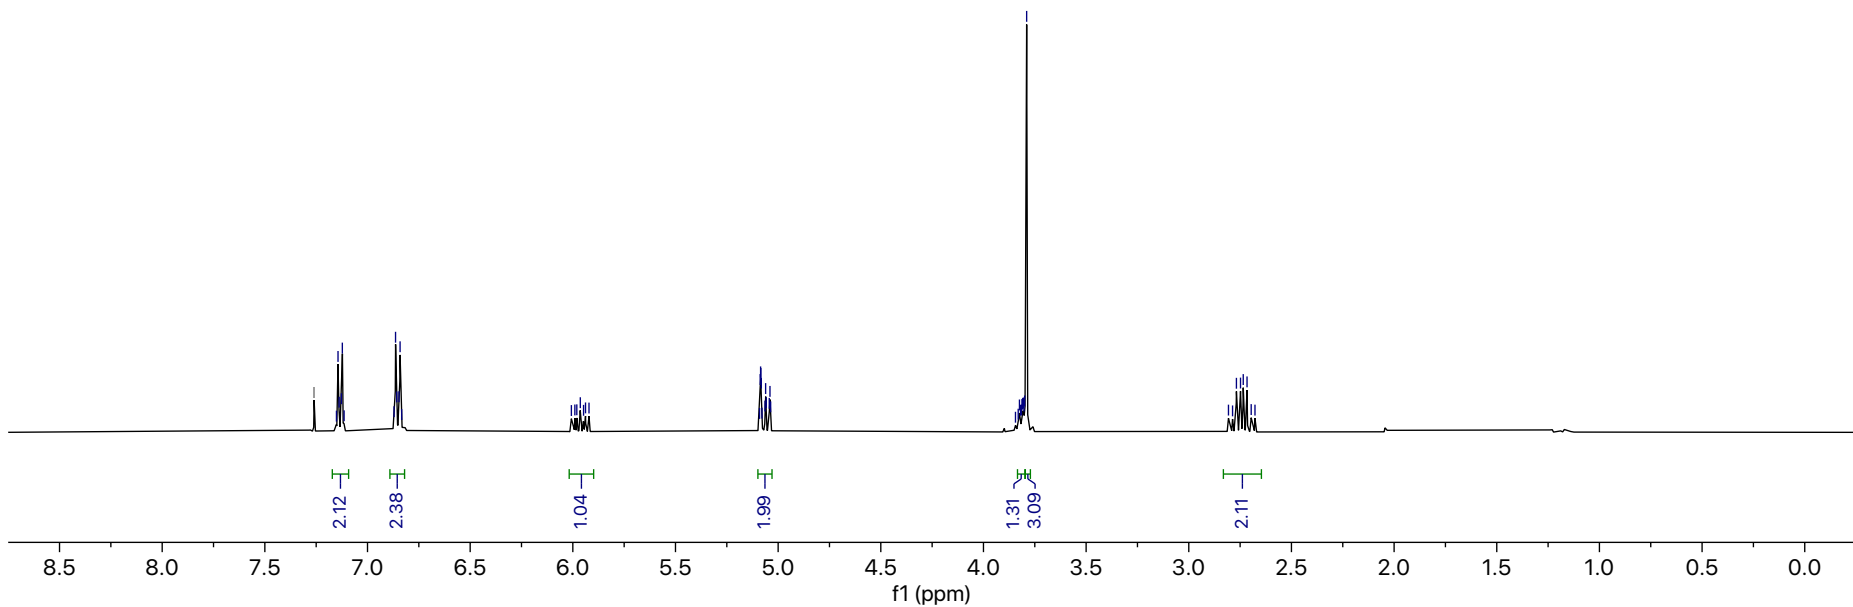

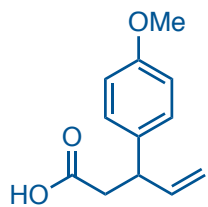

<sup>13</sup>C NMR of **1c** (101 MHz, CDCl<sub>3</sub>)

— 177.81

— 158.53

— 140.41

— 134.32

— 128.63

— 114.82  
— 114.18

— 77.16 CDCl<sub>3</sub>

— 55.38

— 44.49

— 40.16

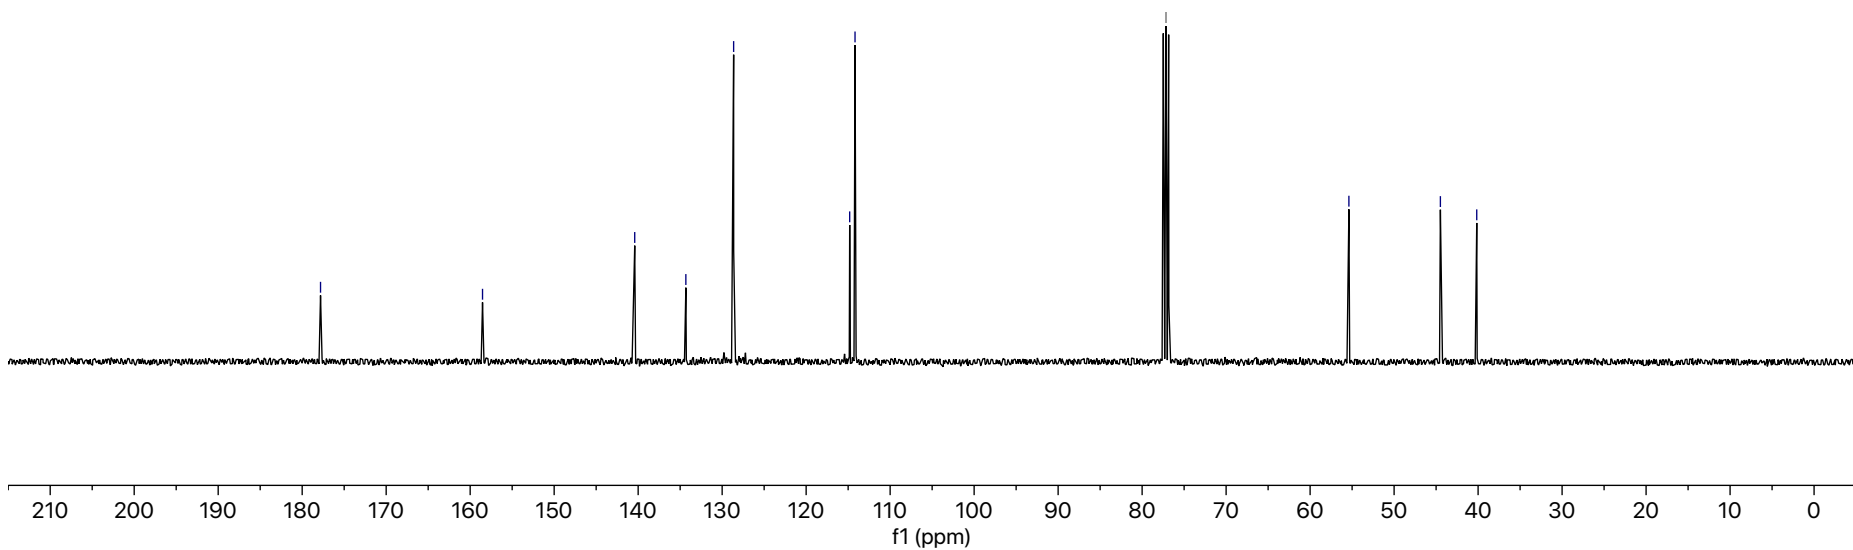

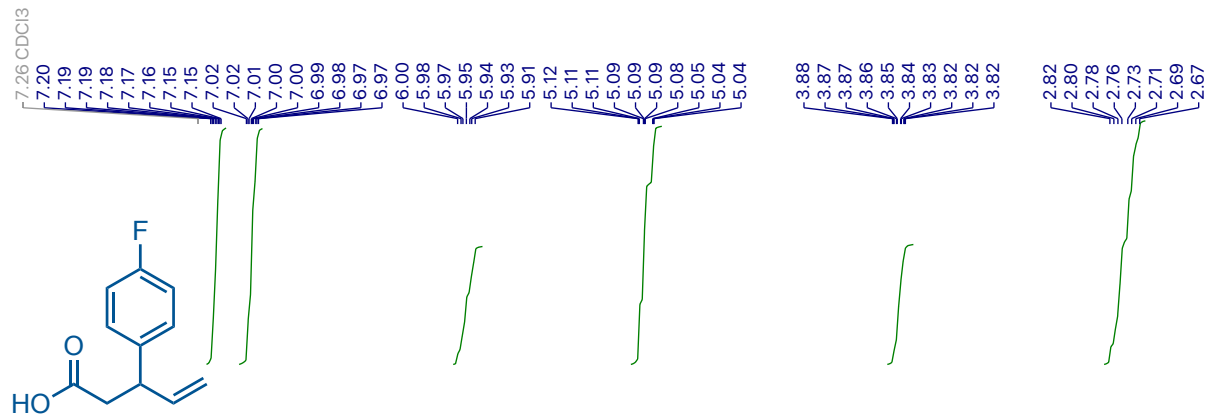

<sup>1</sup>H NMR of **1d** (300 MHz, CDCl<sub>3</sub>)

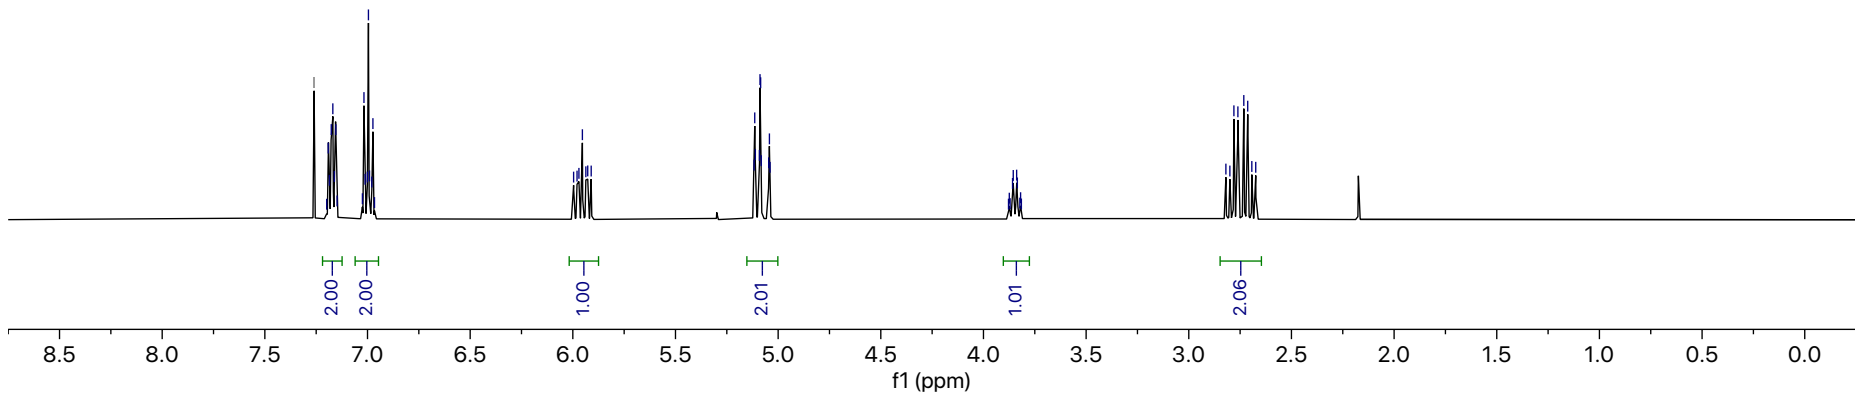

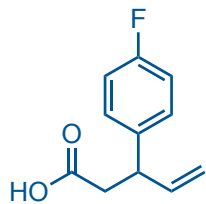

<sup>13</sup>C NMR of **1d** (101 MHz, CDCl<sub>3</sub>)

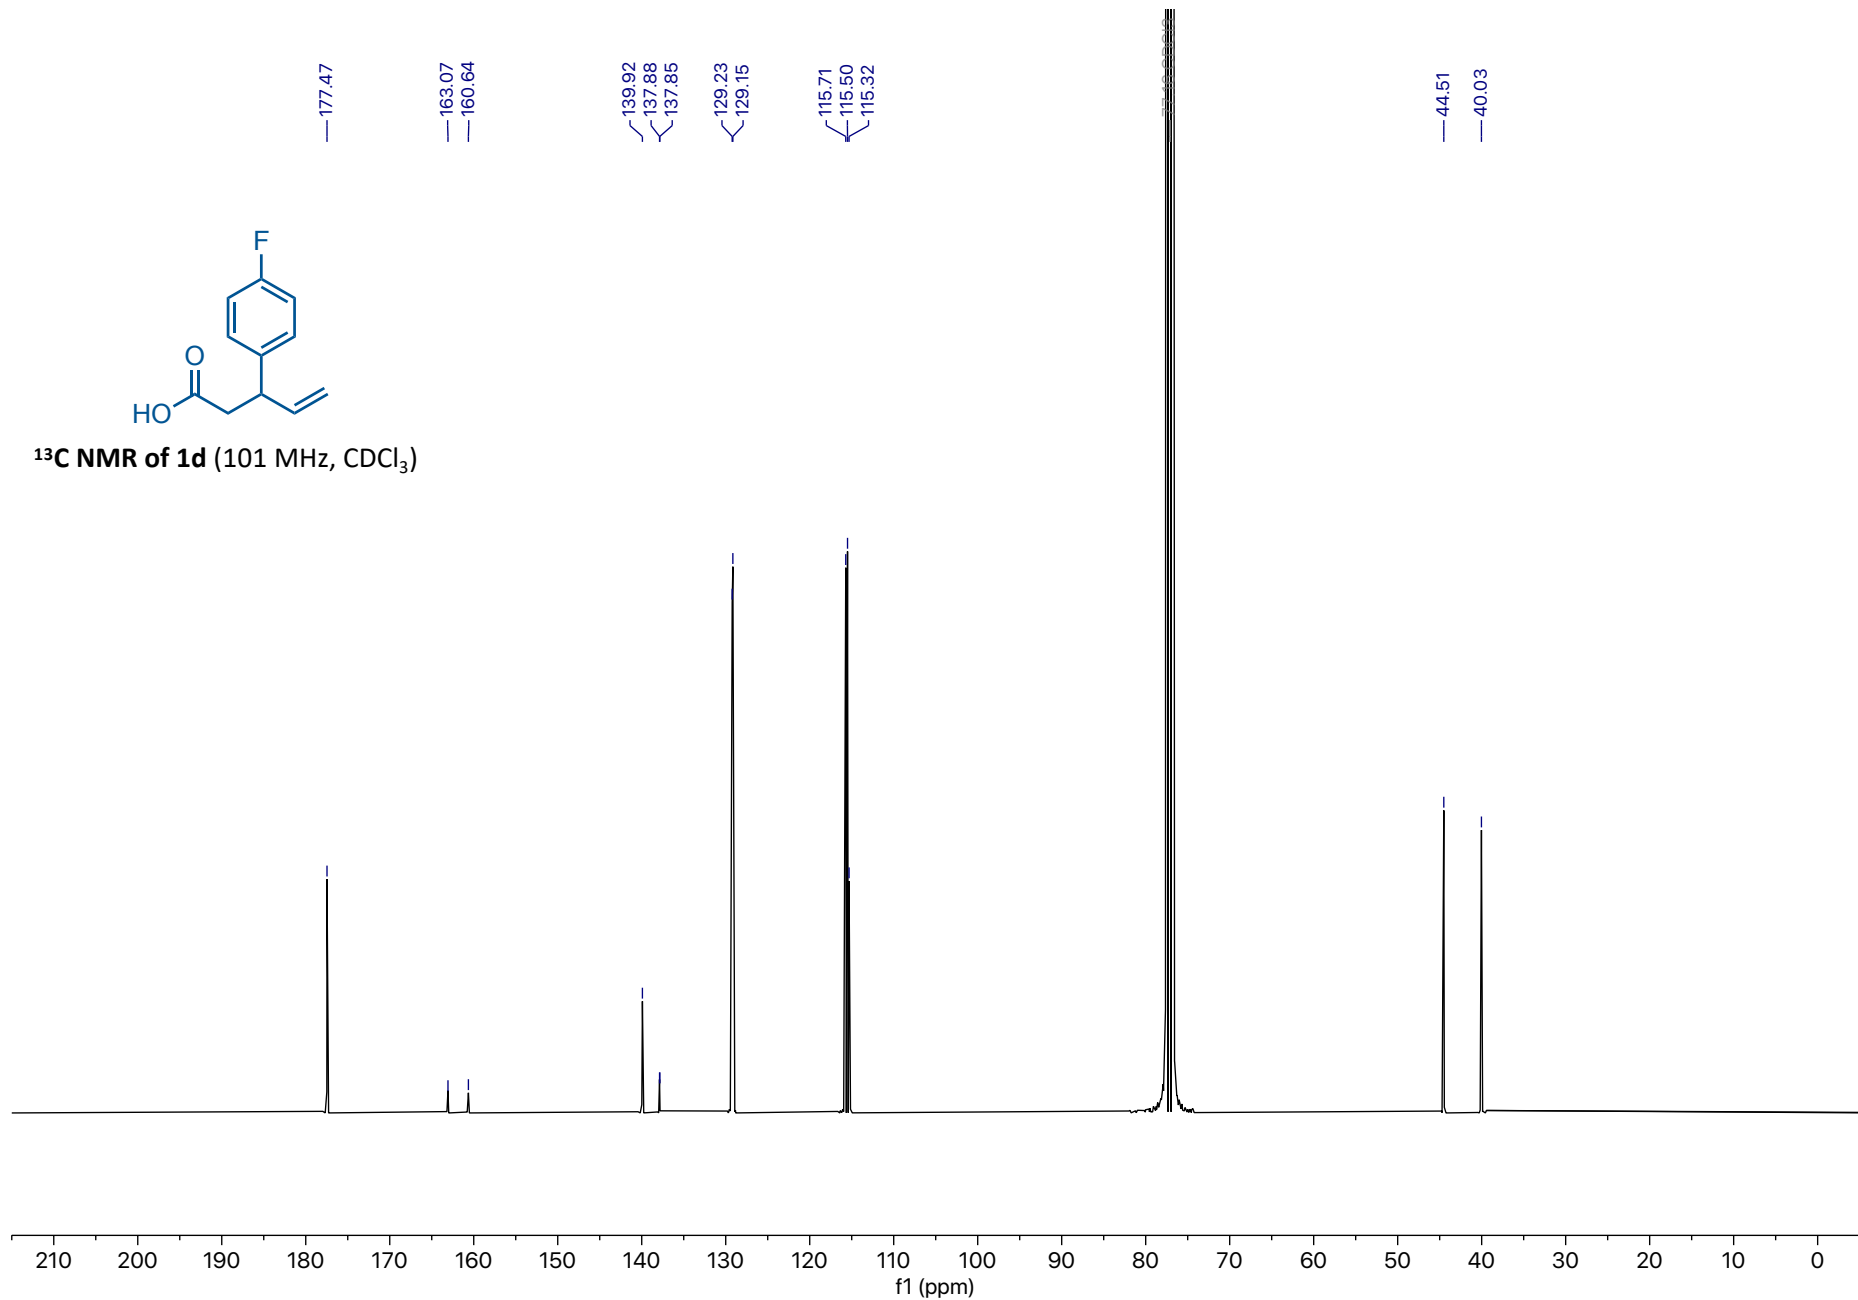

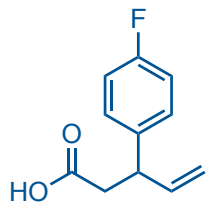

**<sup>19</sup>F NMR of 1d** (471 MHz, CDCl<sub>3</sub>)

— -116.47

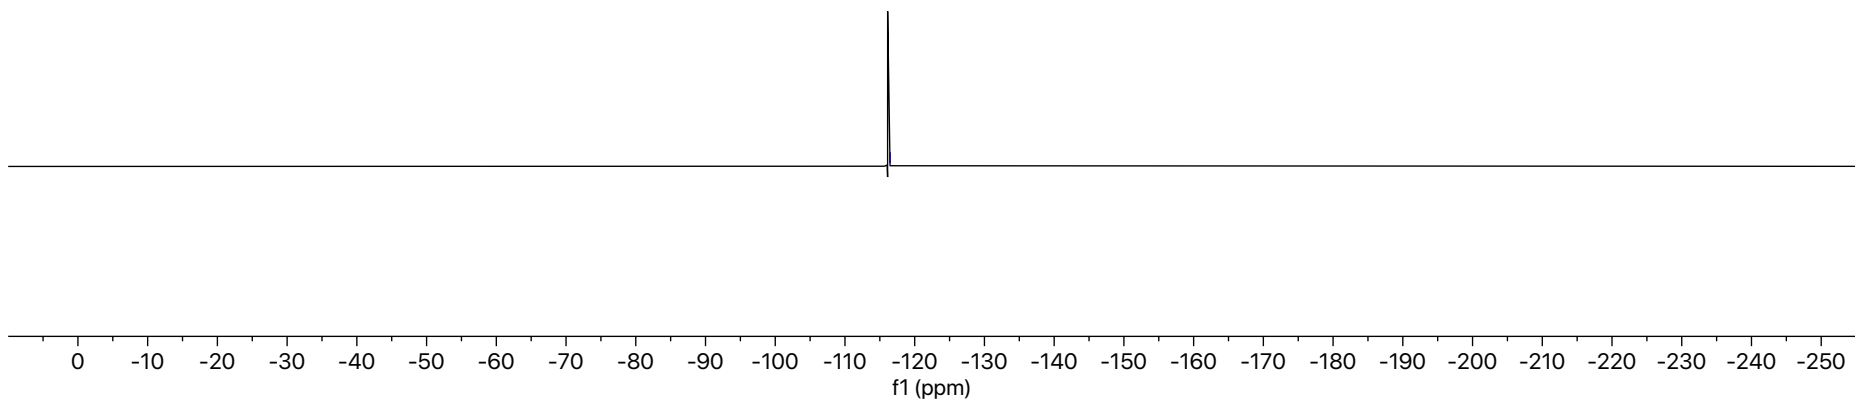

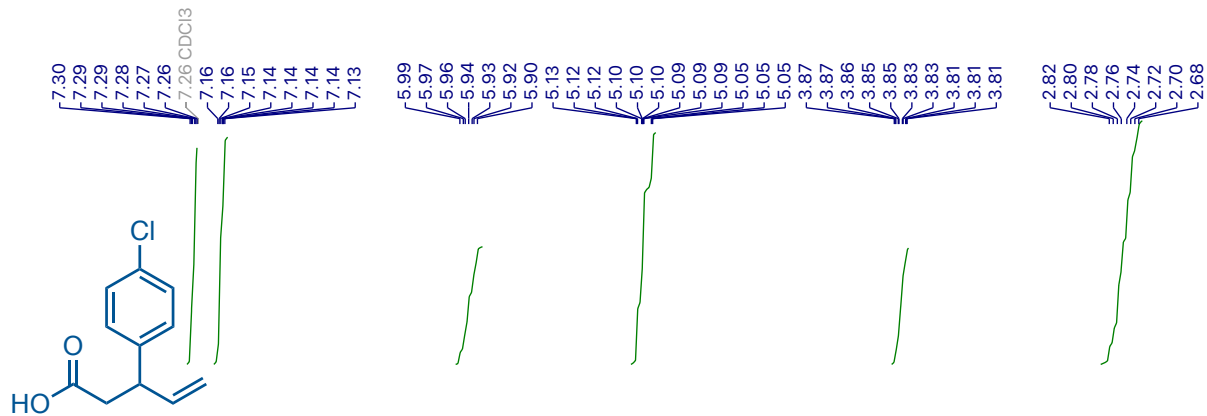

<sup>1</sup>H NMR of 1e (300 MHz, CDCl<sub>3</sub>)

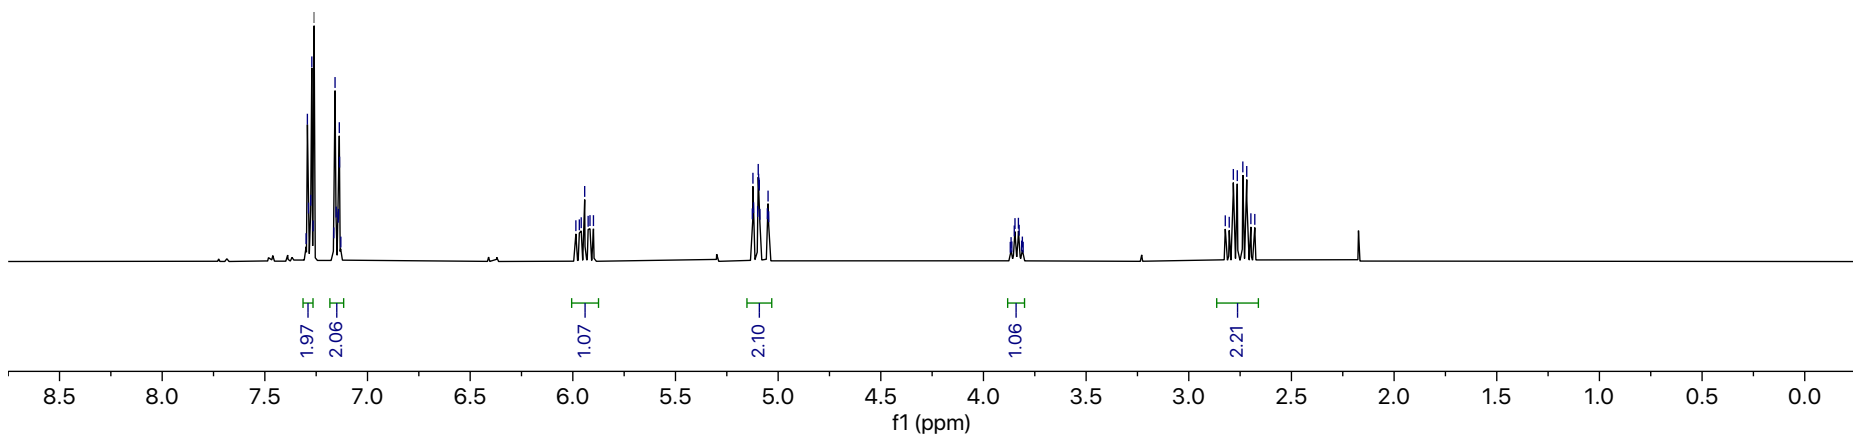

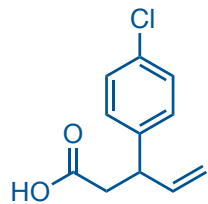

<sup>13</sup>C NMR of 1e (101 MHz, CDCl<sub>3</sub>)

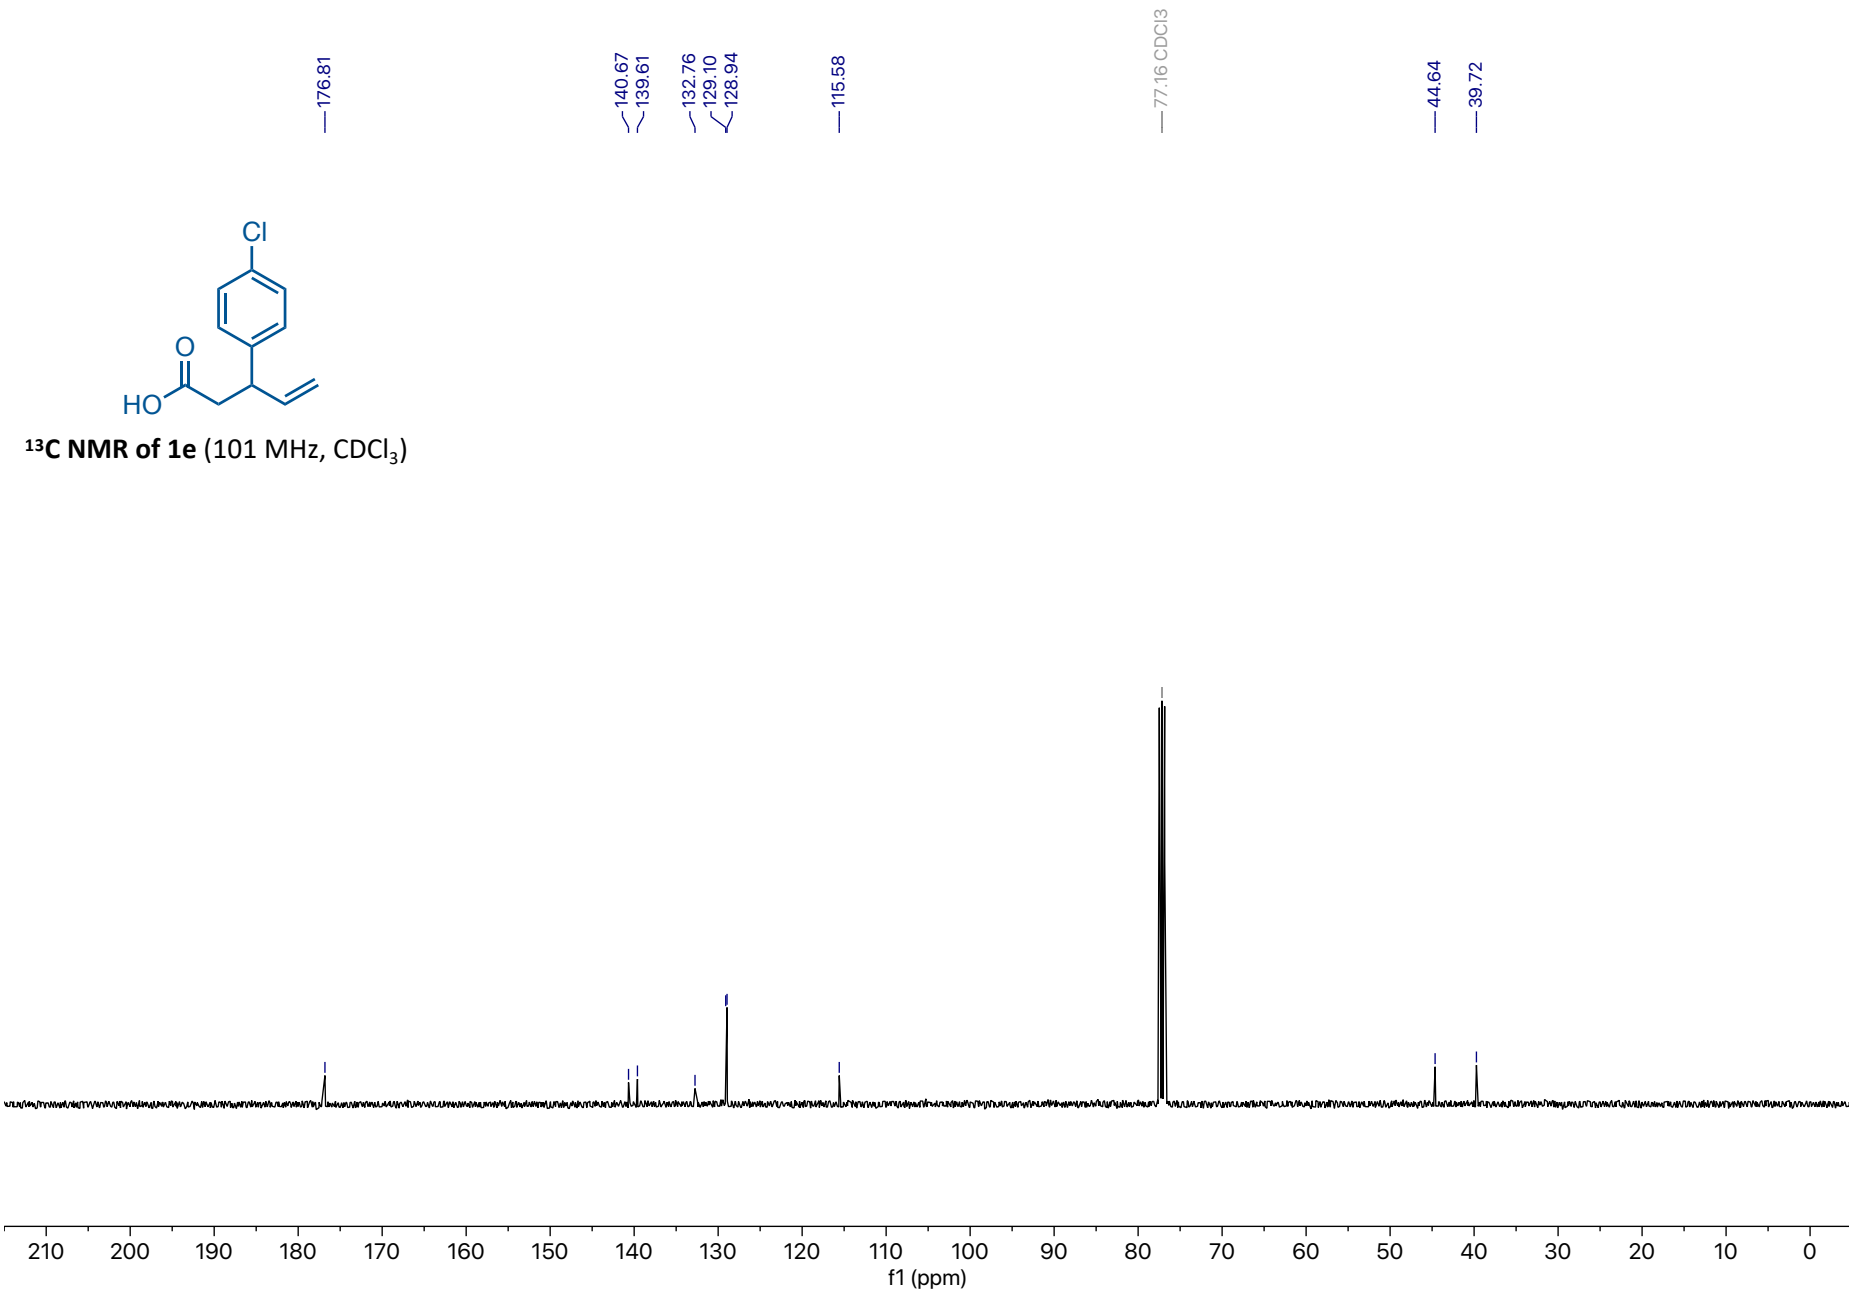



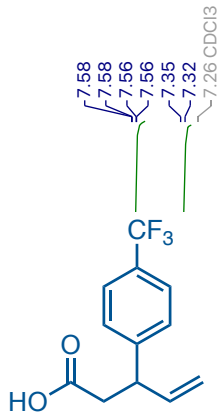

$^1\text{H}$  NMR of **1f** (300 MHz,  $\text{CDCl}_3$ )

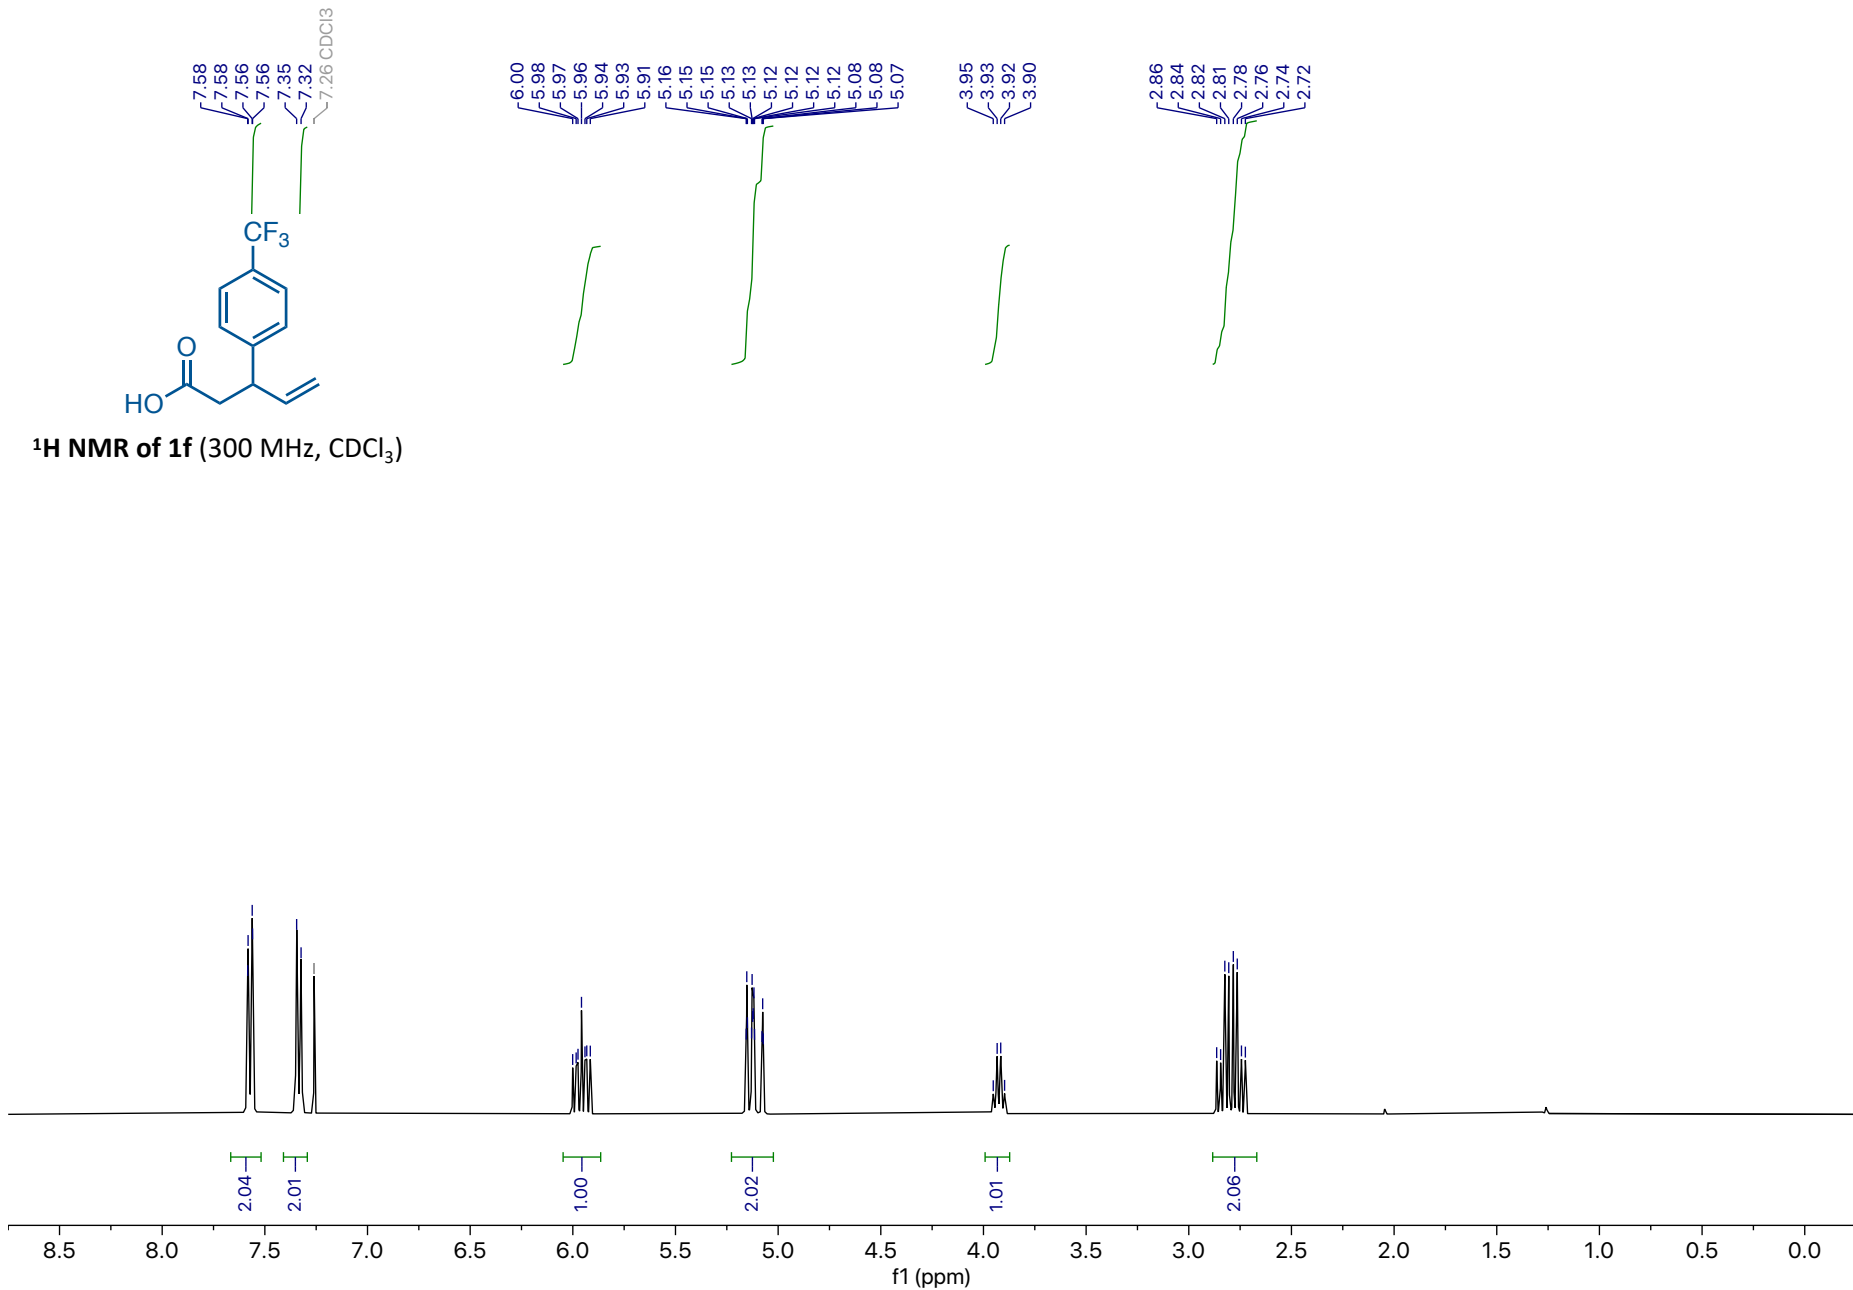

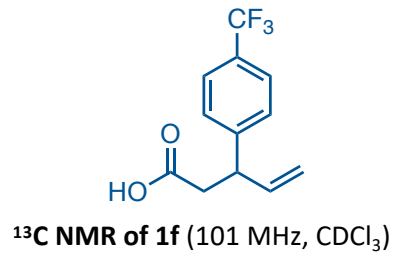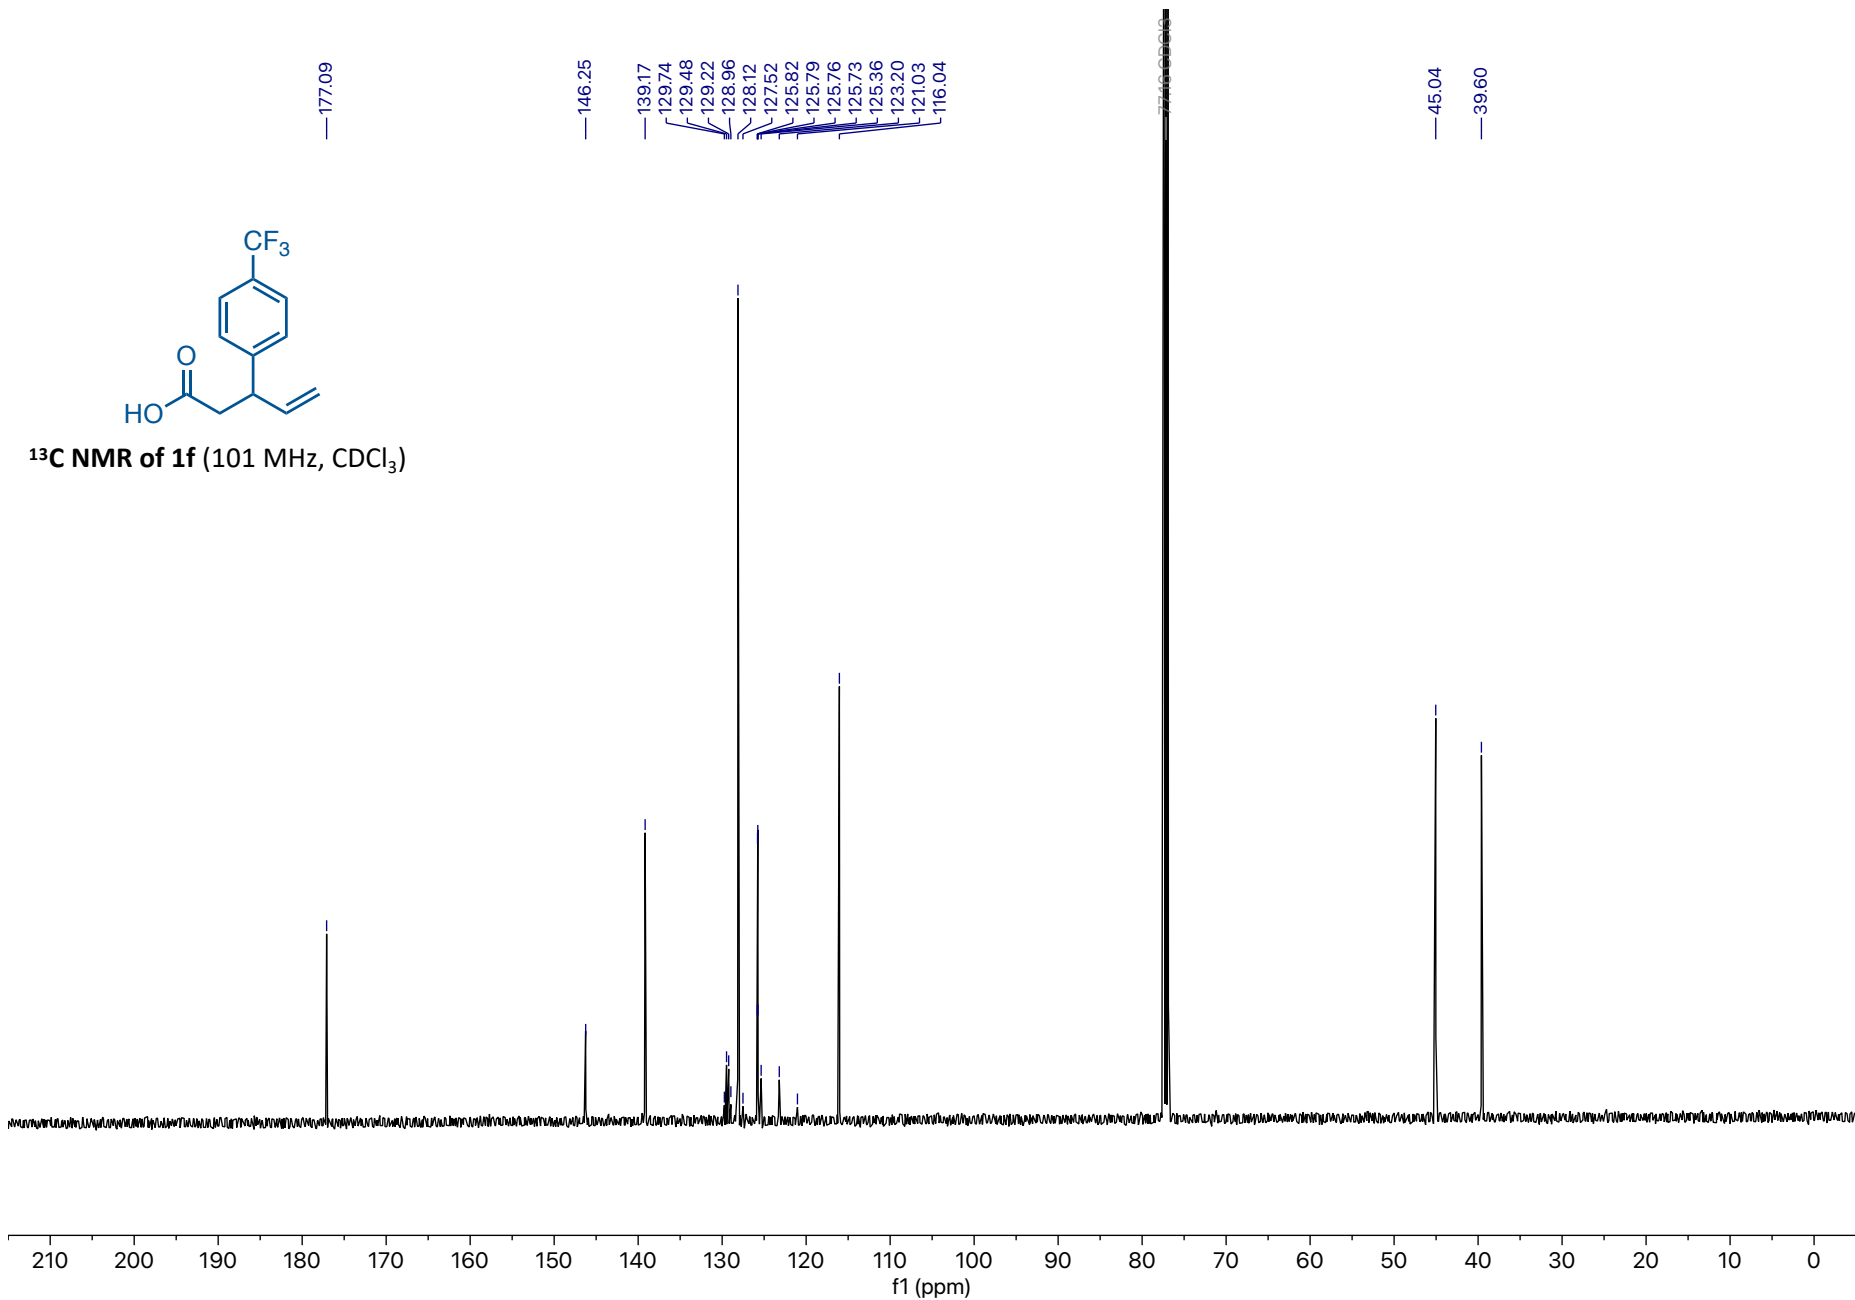

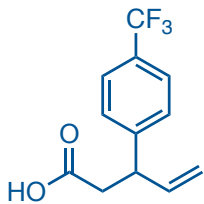

**<sup>19</sup>F NMR of 1f** (282 MHz, CDCl<sub>3</sub>)

---62.49

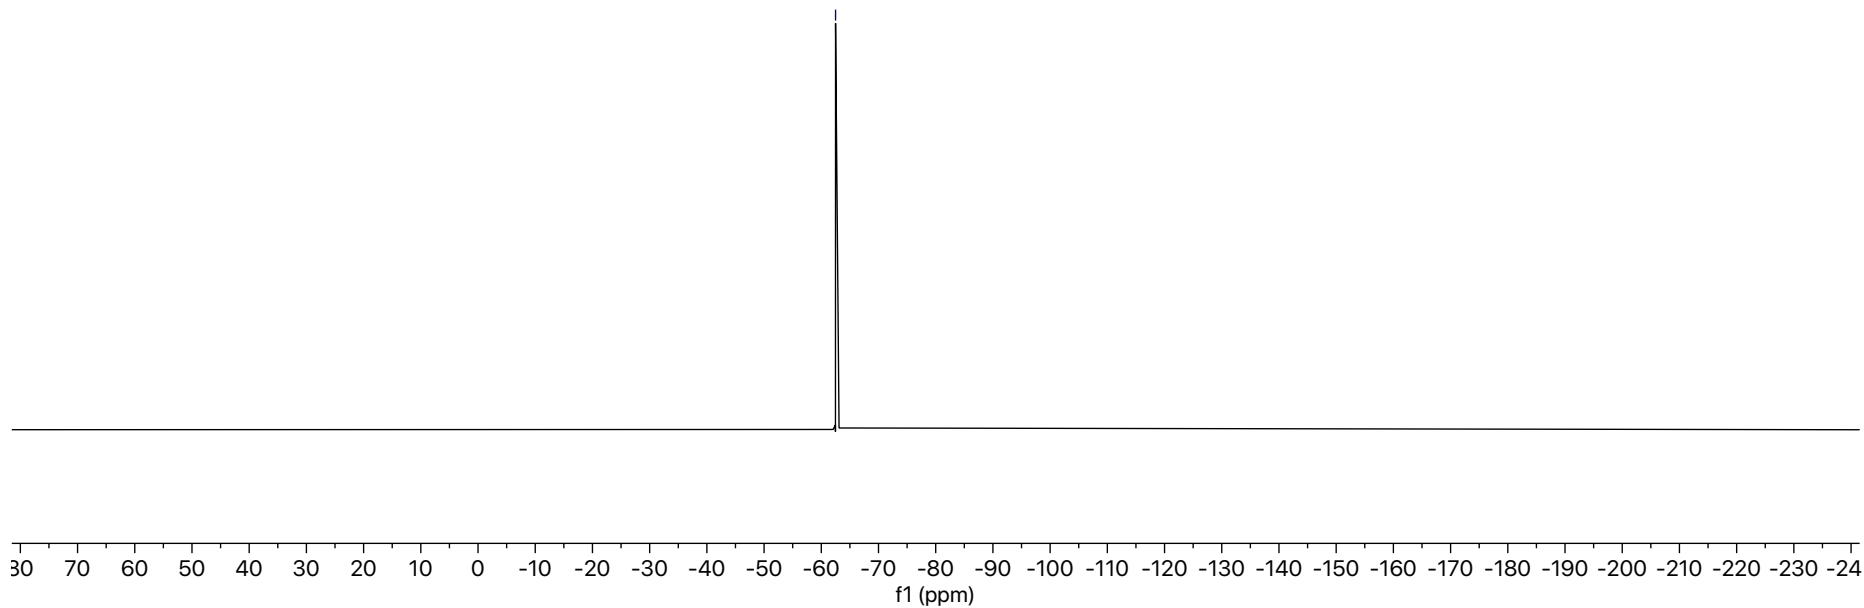

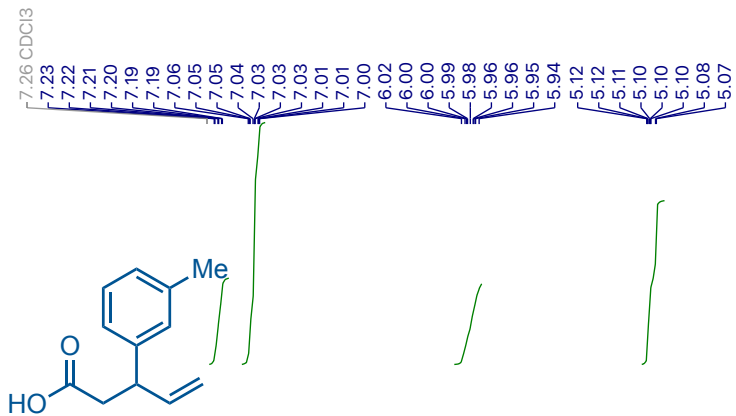

<sup>1</sup>H NMR of **1g** (300 MHz, CDCl<sub>3</sub>)

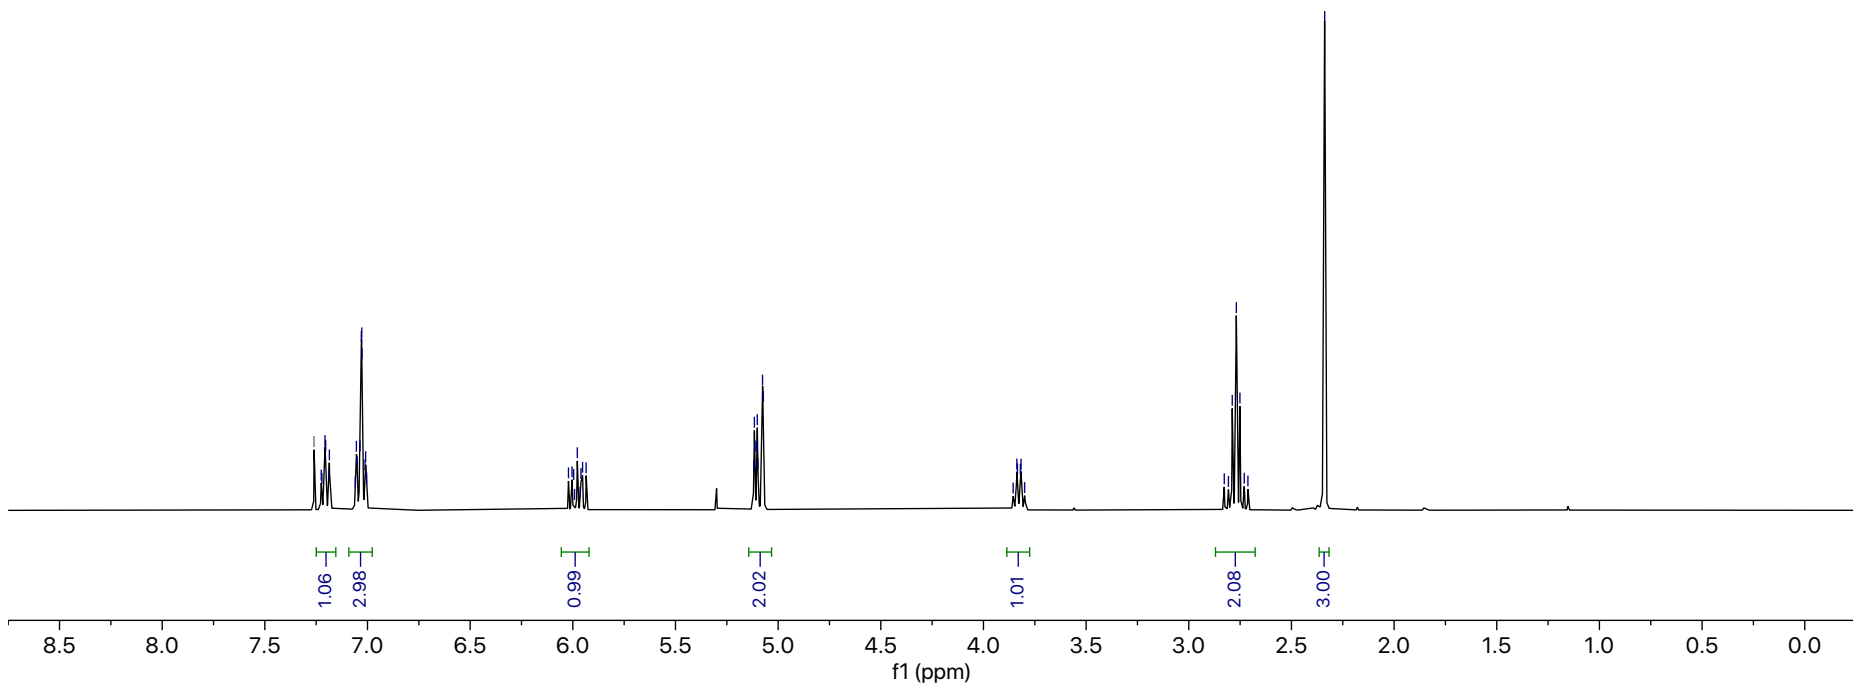

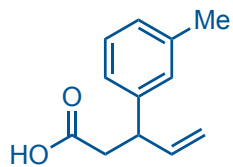

$^{13}\text{C}$  NMR of **1g** (101 MHz,  $\text{CDCl}_3$ )

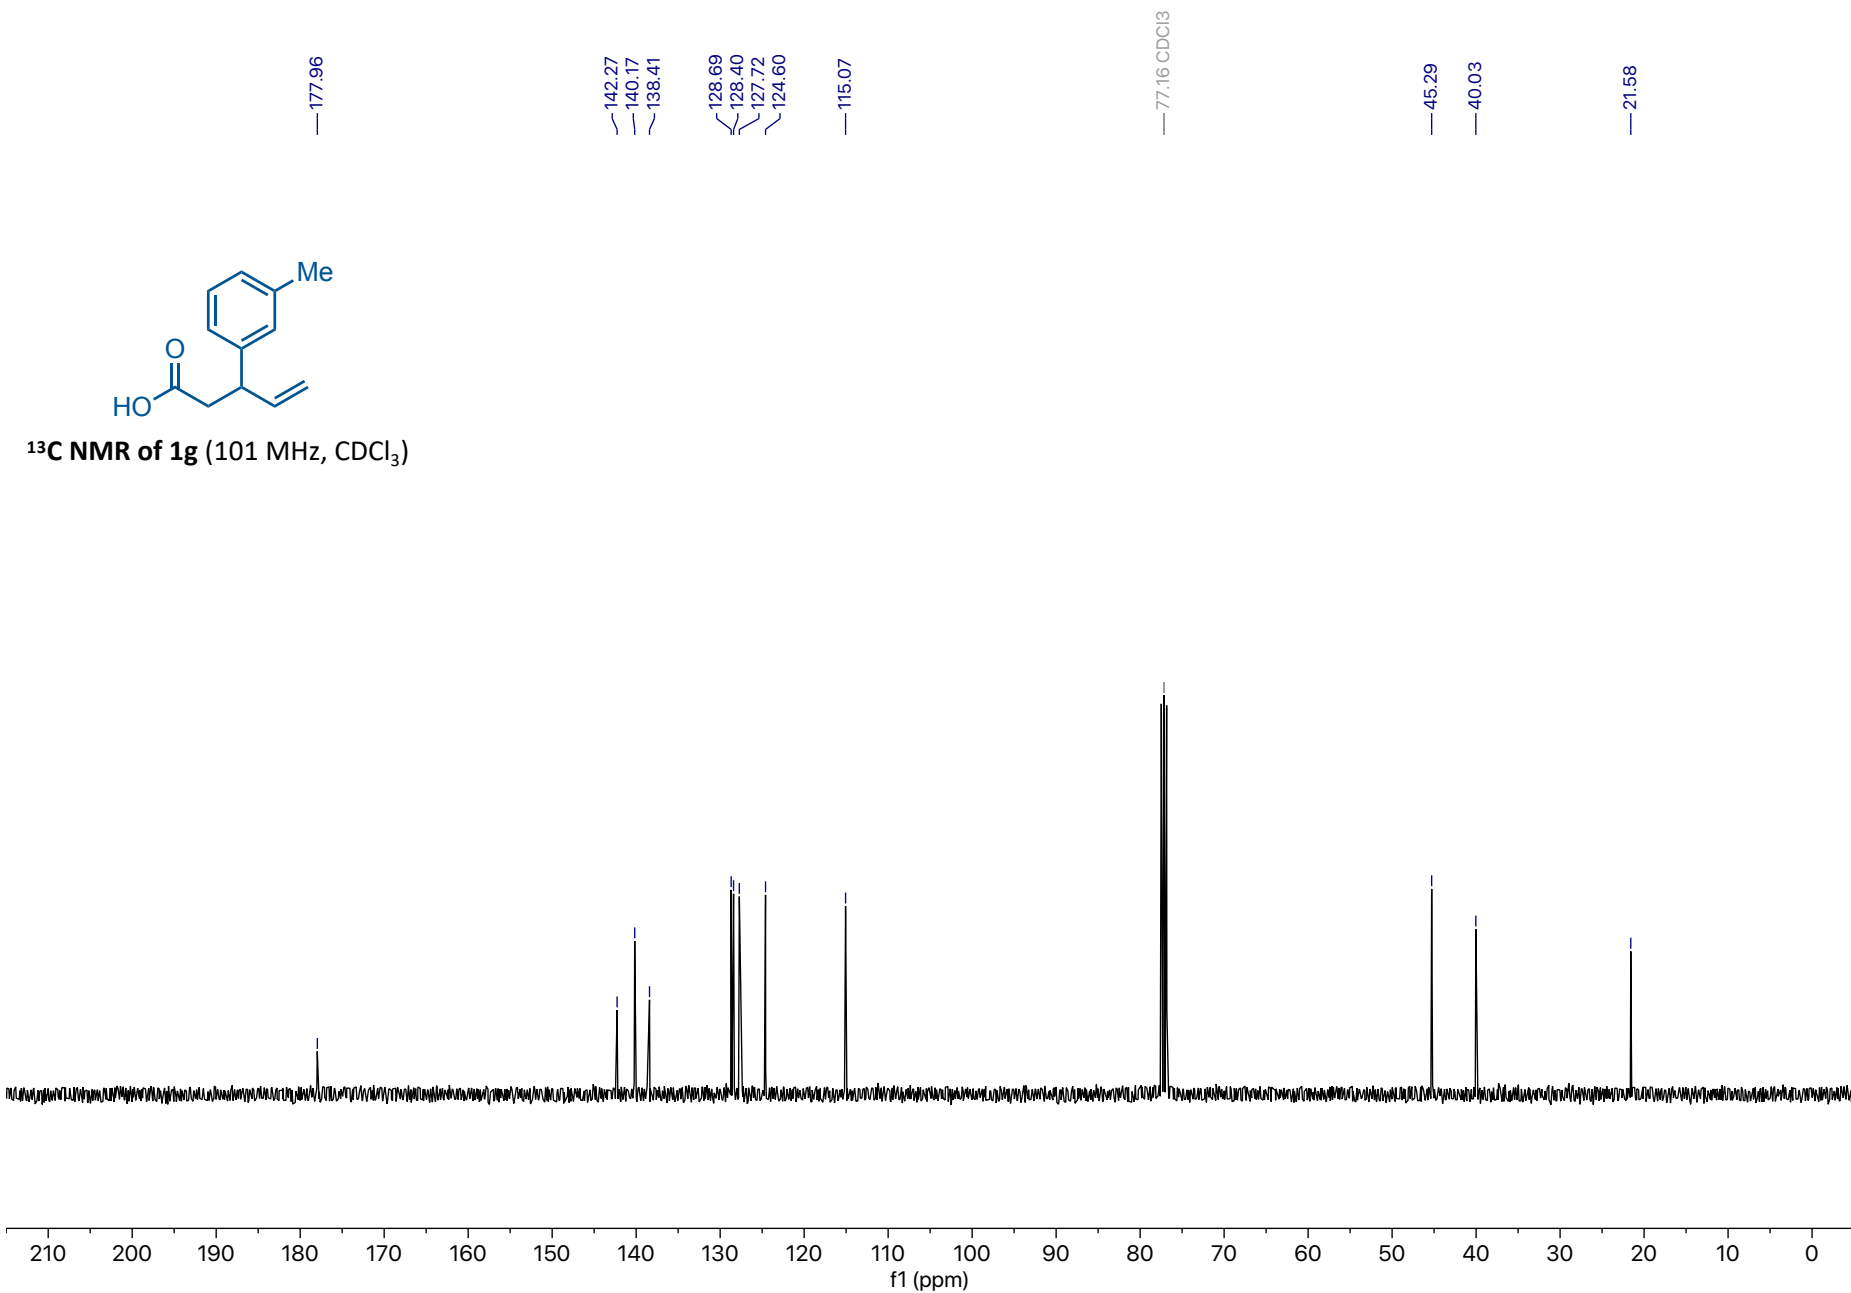

7.26 CDCl<sub>3</sub>  
 7.22  
 7.21  
 7.20  
 7.20  
 7.19  
 7.18  
 7.18  
 7.17  
 7.16  
 7.15  
 7.14  
 7.13  
 7.13  
 7.11  
 7.11  
 5.97  
 5.96  
 5.95  
 5.93  
 5.91  
 5.90  
 5.89  
 5.09  
 5.09  
 5.07  
 5.07  
 5.06  
 5.05  
 5.04  
 5.04  
 5.00  
 5.00  
 4.15  
 4.14  
 4.14  
 4.13  
 4.13  
 4.12  
 4.12  
 4.11  
 4.11  
 4.10  
 4.10  
 4.09  
 4.09  
 4.08  
 2.84  
 2.82  
 2.80  
 2.78  
 2.78  
 2.76  
 2.74  
 2.72  
 2.37

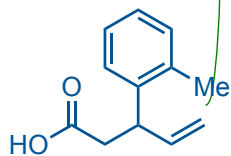

<sup>1</sup>H NMR of 1h (300 MHz, CDCl<sub>3</sub>)

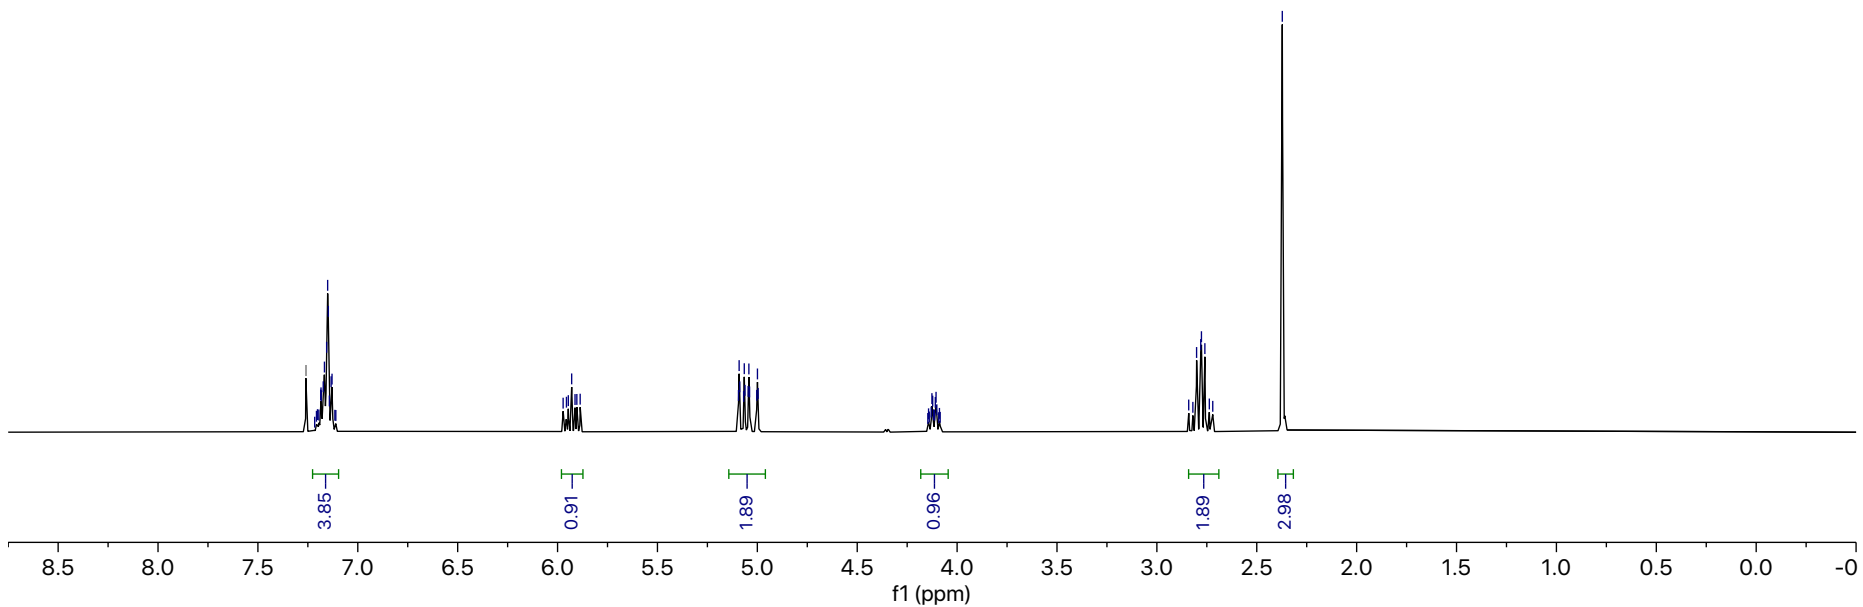

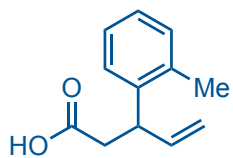

<sup>13</sup>C NMR of 1h (101 MHz, CDCl<sub>3</sub>)

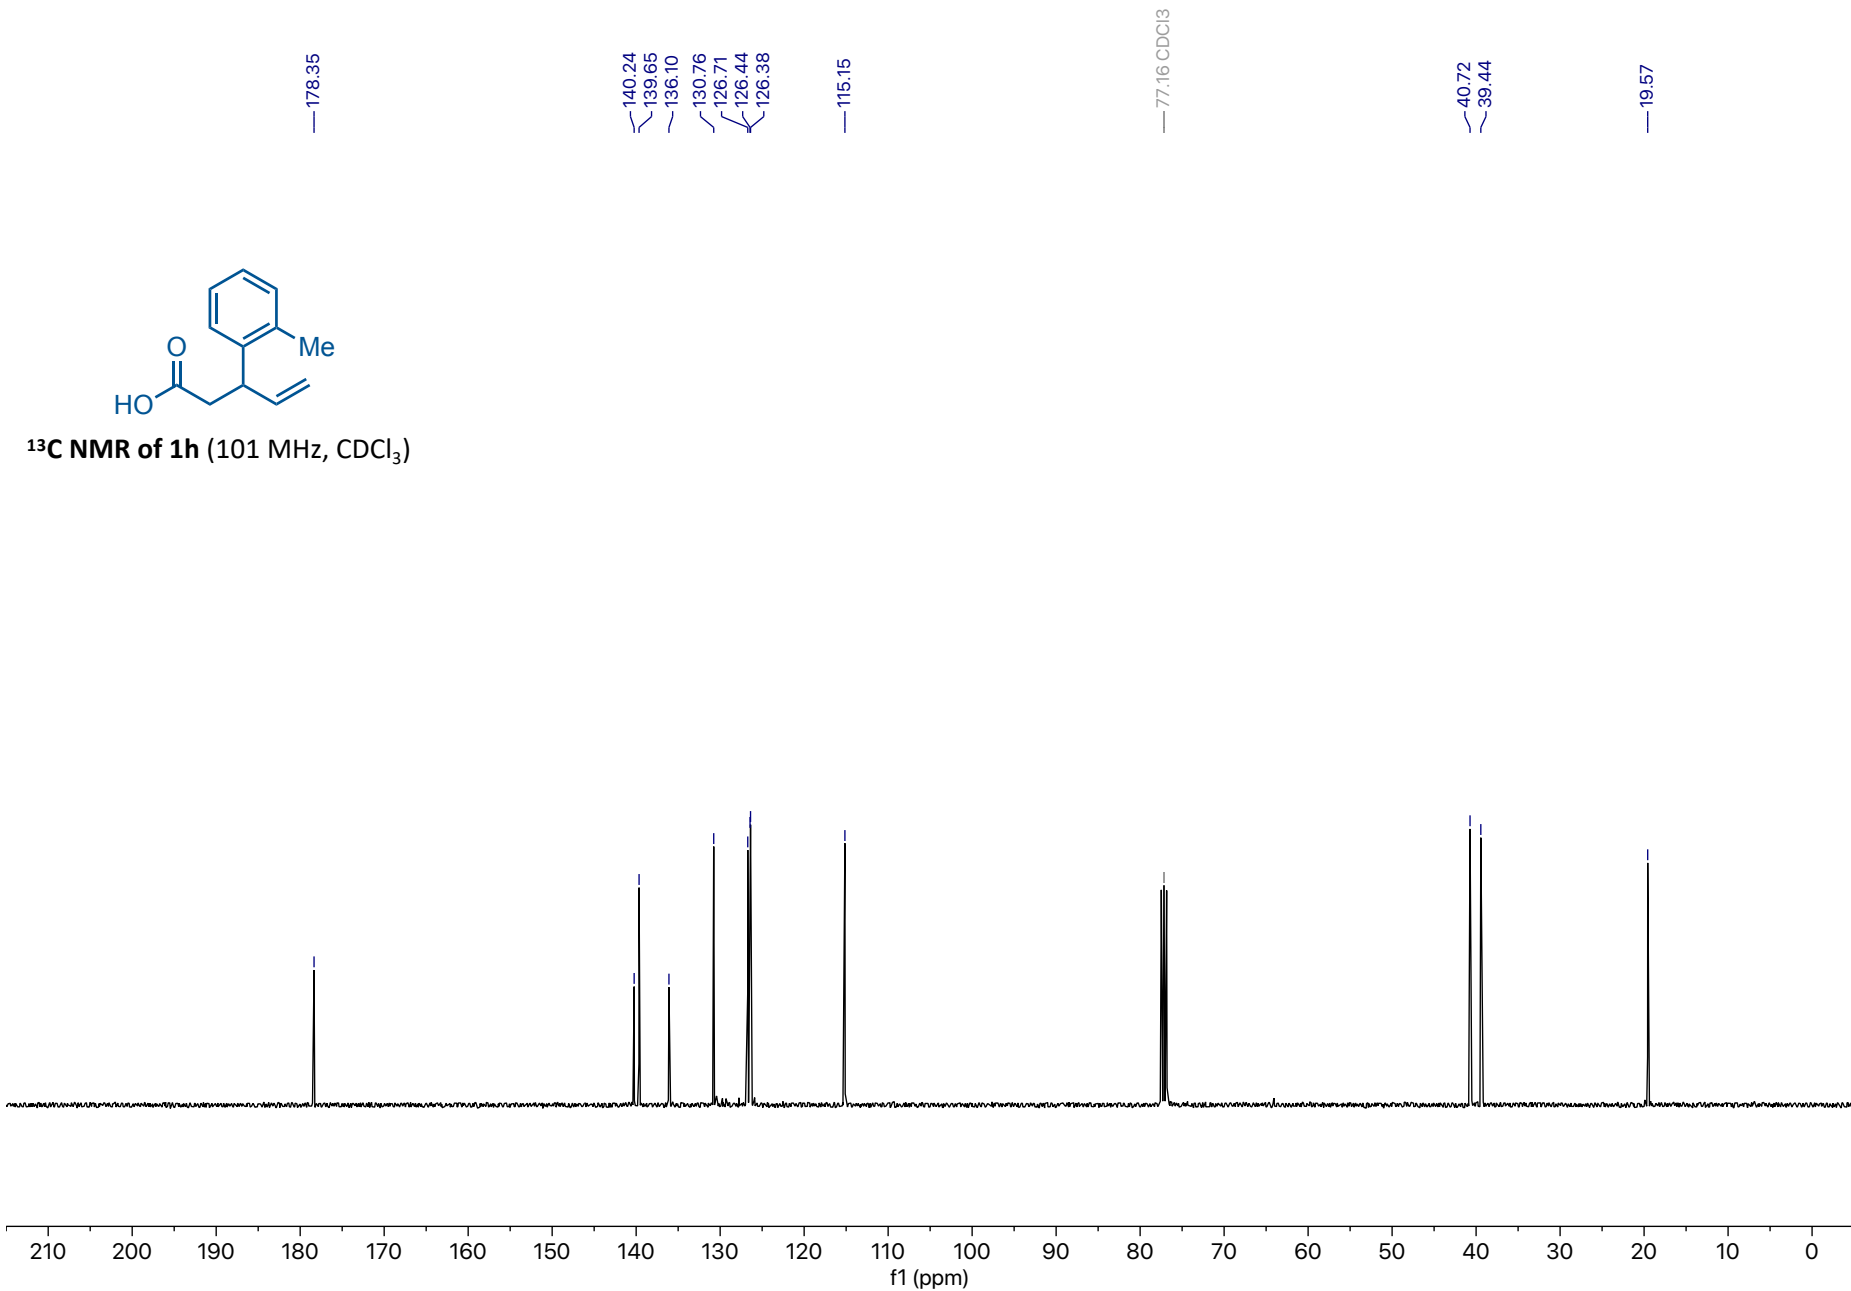

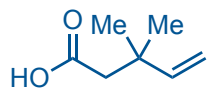

<sup>1</sup>H NMR of **1j** (300 MHz, CDCl<sub>3</sub>)

—7.26 CDCl<sub>3</sub>

5.95  
5.92  
5.90  
5.88

5.03  
5.02  
4.98  
4.98  
4.96  
4.95

—2.34

—1.16

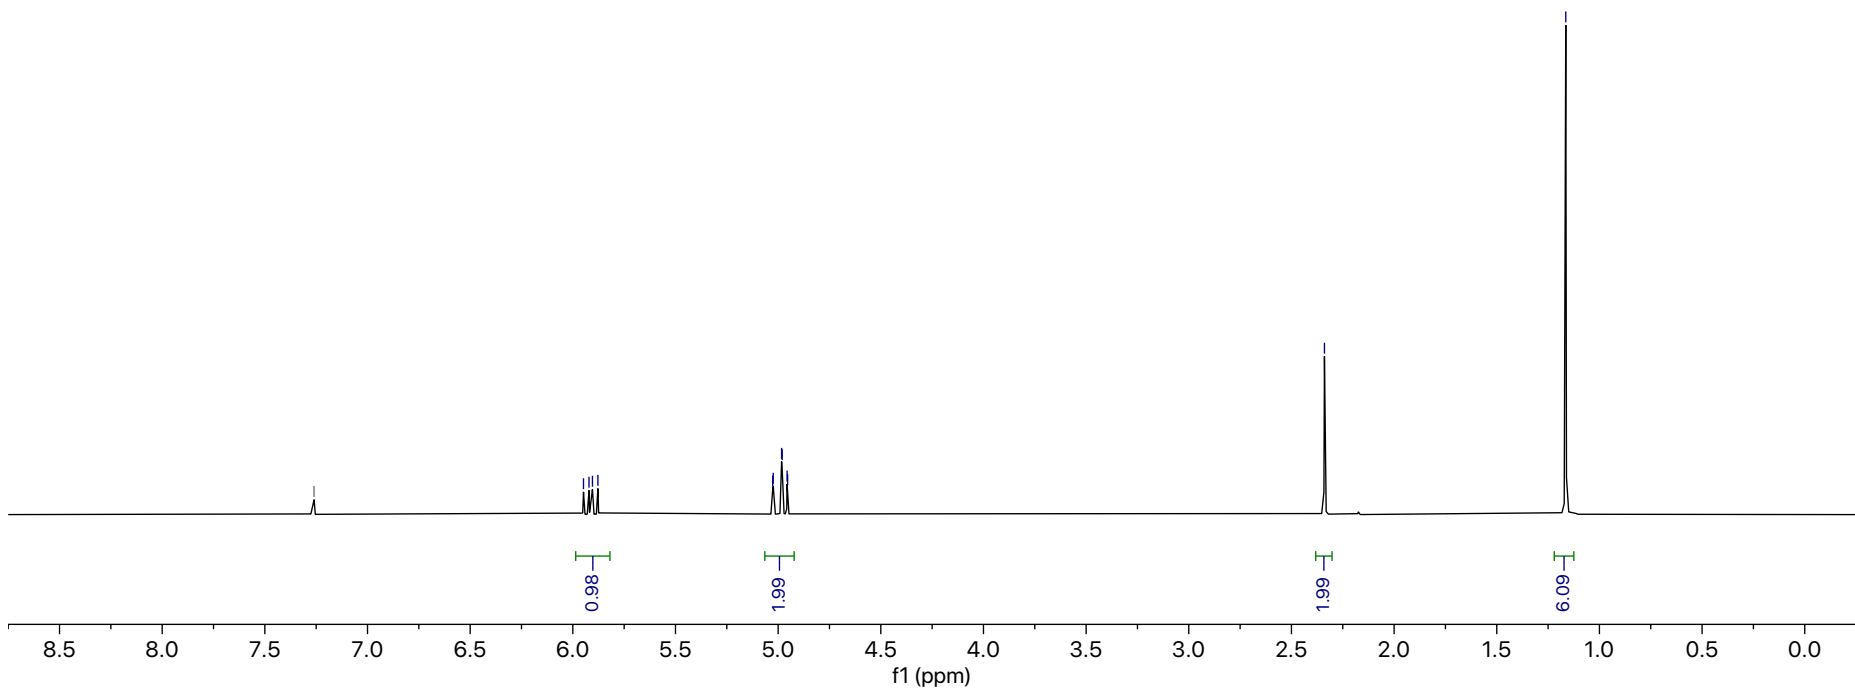



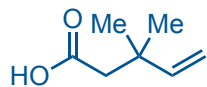

$^{13}\text{C}$  NMR of **1j** (101 MHz,  $\text{CDCl}_3$ )

—178.15

—146.64

—111.29

—77.16  $\text{CDCl}_3$

—46.68

—36.15

—27.04

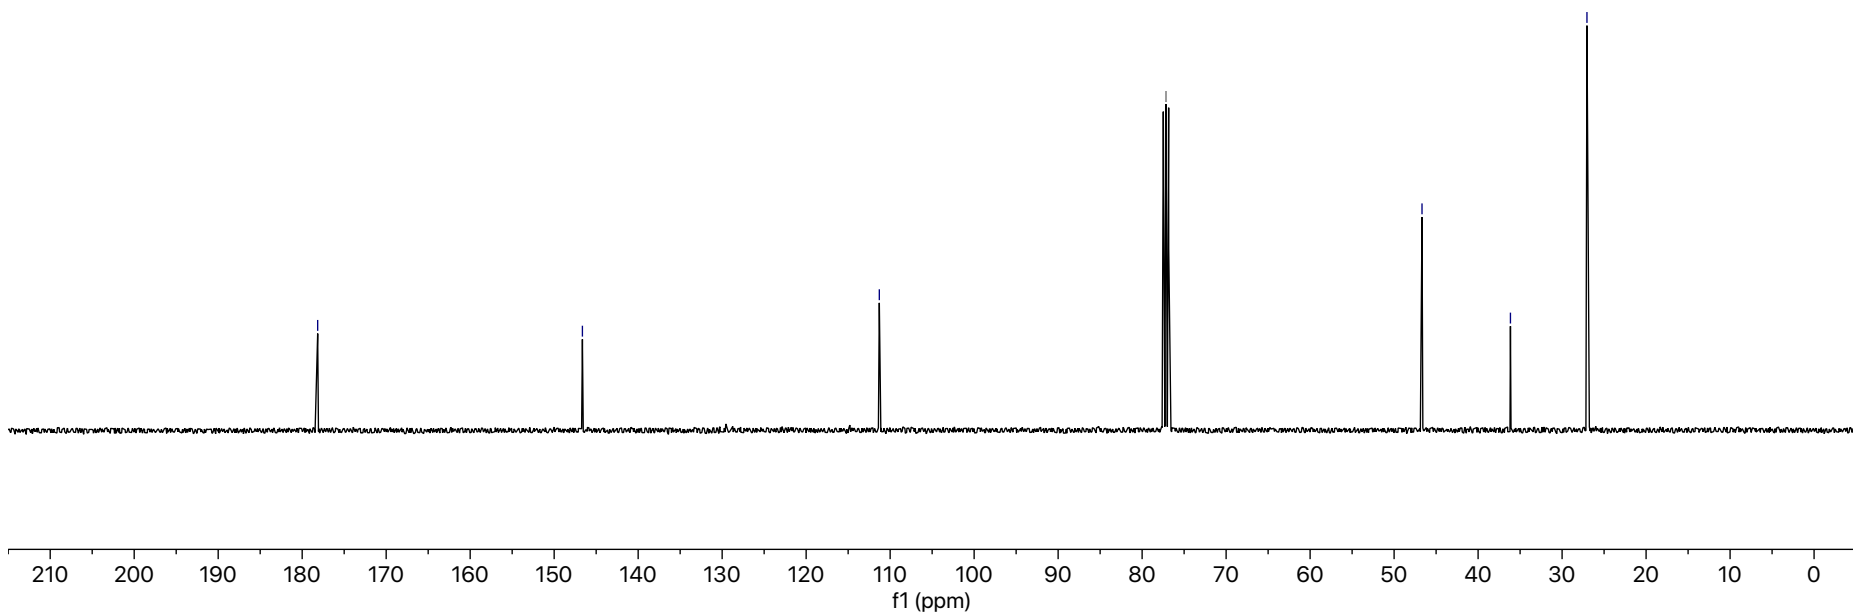

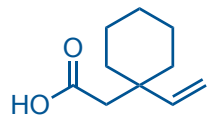

<sup>1</sup>H NMR of **1k** (300 MHz, CDCl<sub>3</sub>)

—7.26 CDCl<sub>3</sub>

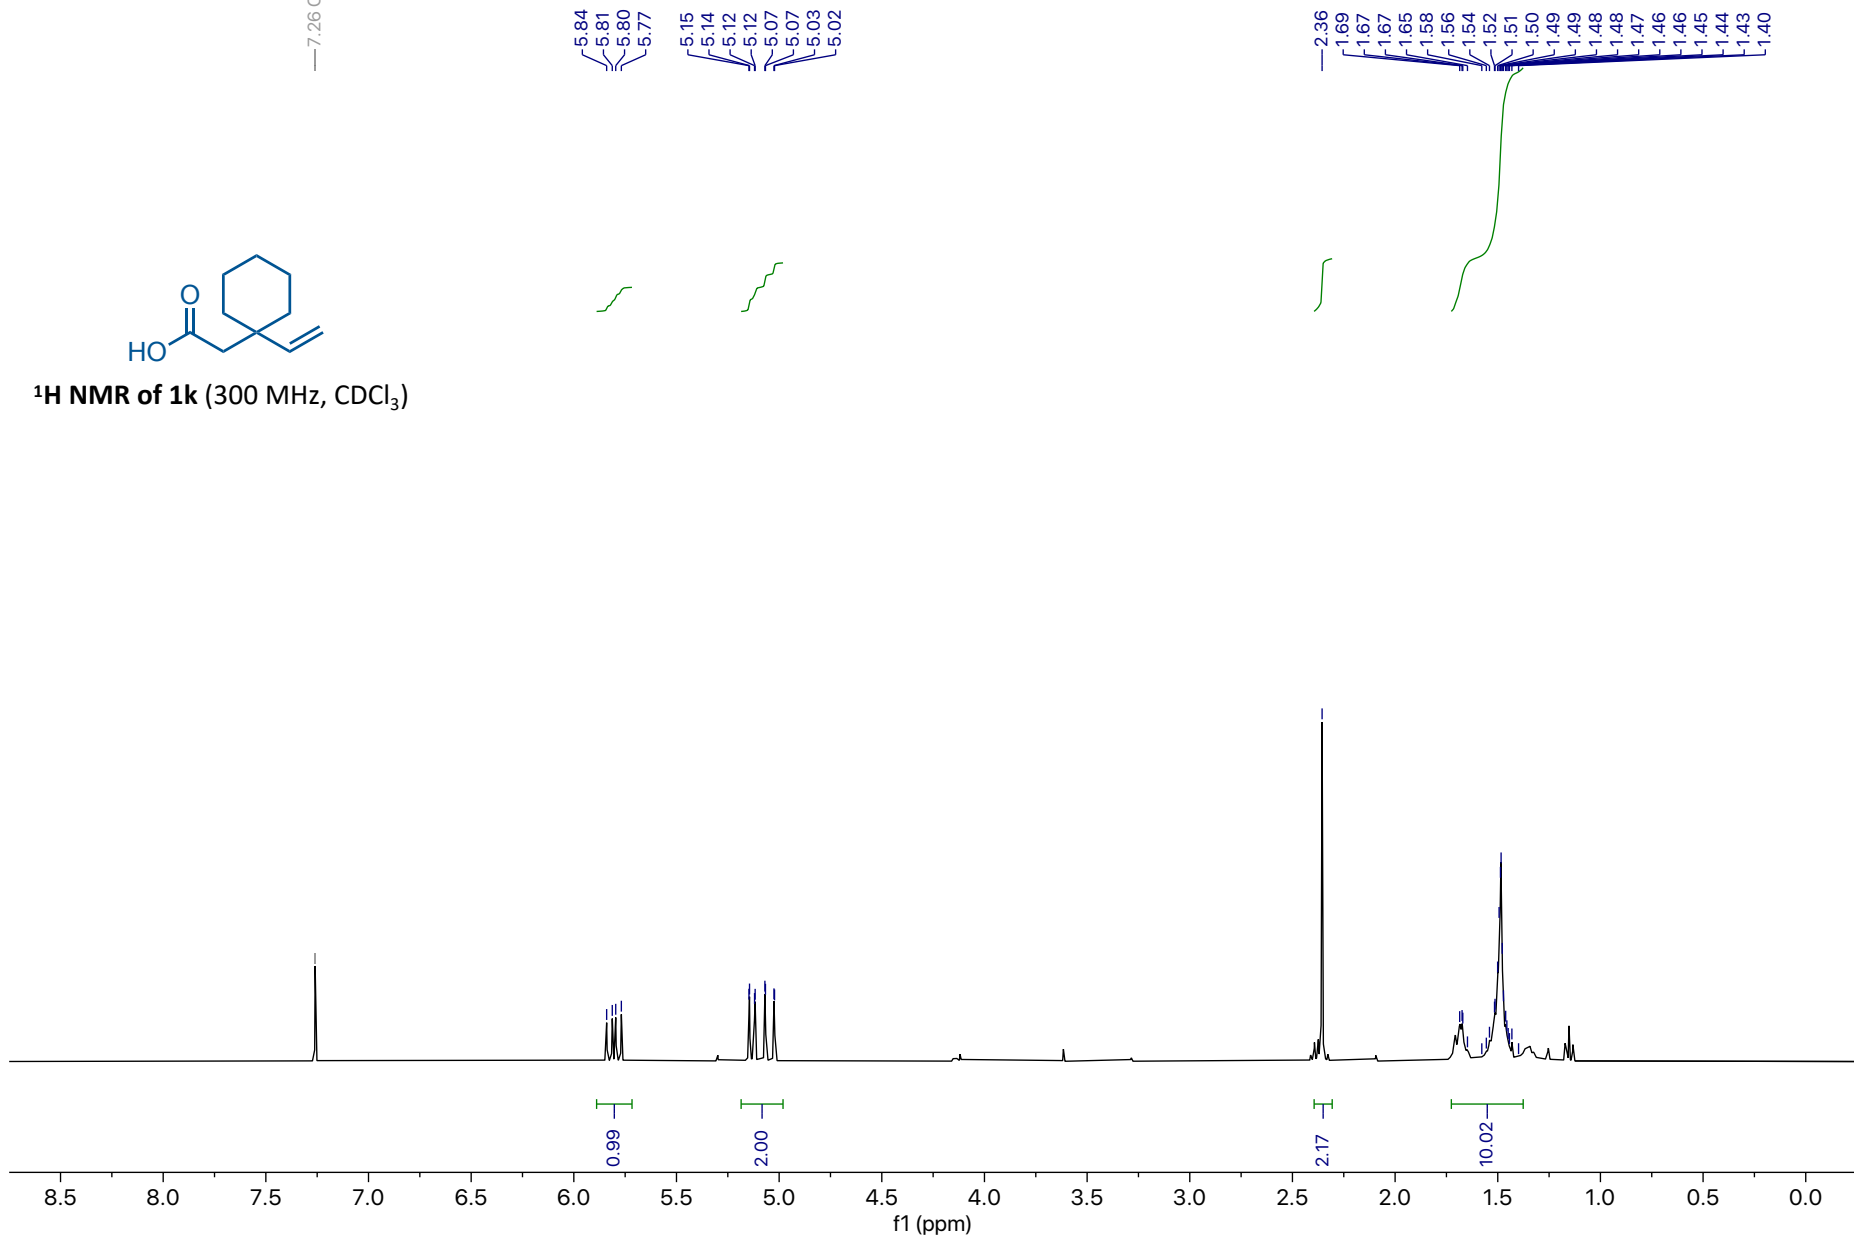

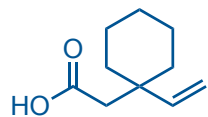

<sup>13</sup>C NMR of 1k (101 MHz, CDCl<sub>3</sub>)

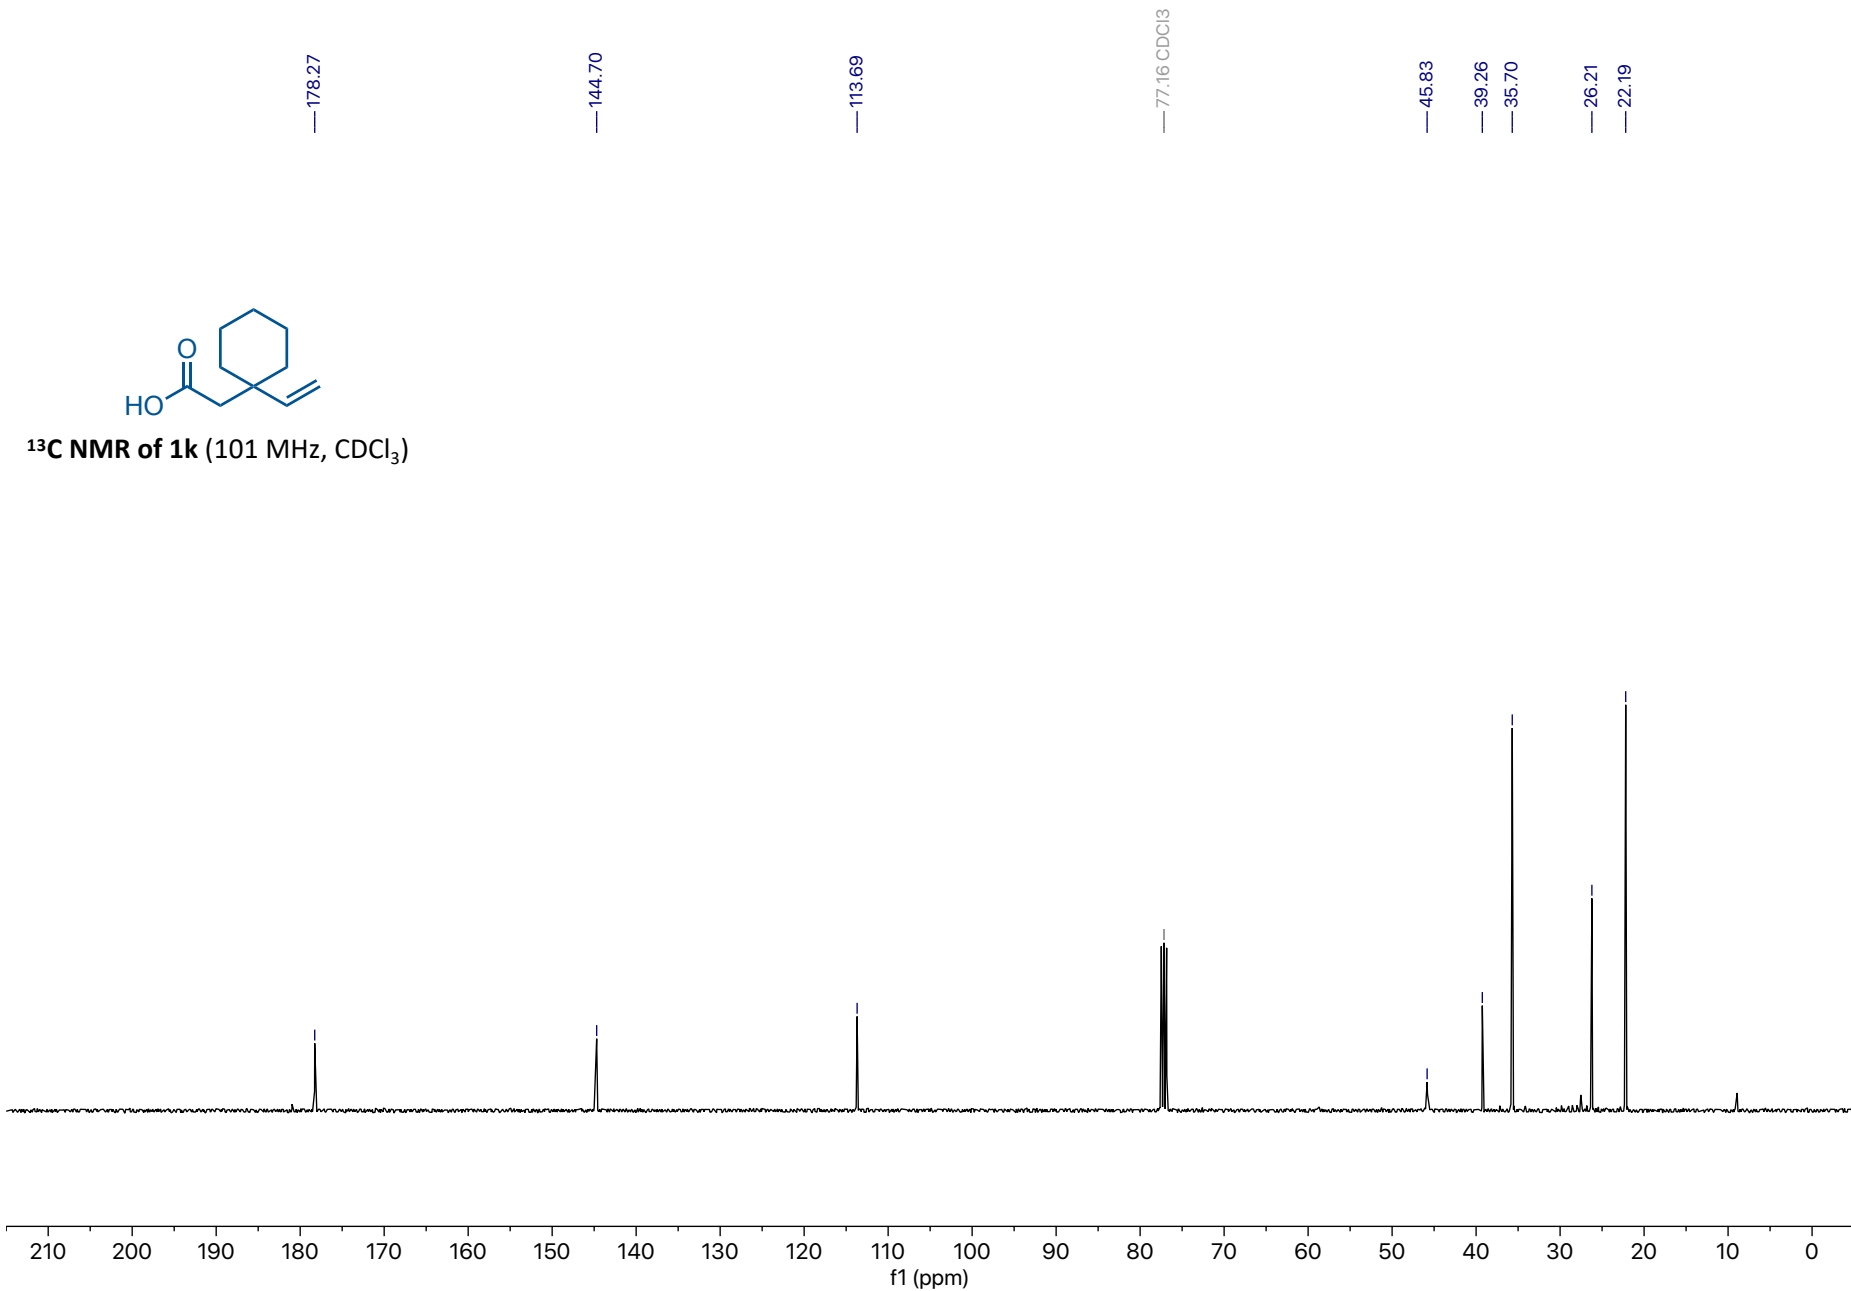

7.88  
7.87  
7.86  
7.85  
7.84  
7.83  
7.83  
7.75  
7.74  
7.73  
7.73  
7.72  
7.76 CDCl<sub>3</sub>

5.76  
5.75  
5.74  
5.74  
5.73  
5.72  
5.72  
5.71  
5.70  
5.70  
5.69  
5.68  
5.67  
5.66  
5.10  
5.10  
5.10  
5.09  
5.06  
5.06  
5.05  
5.05  
5.02  
5.02  
5.02  
5.01  
5.00  
5.00  
4.99  
4.99  
4.98  
3.09  
3.09  
3.08  
3.07  
3.07  
3.06  
3.06  
3.06  
3.05  
3.05  
3.05  
3.04  
3.04  
3.04  
3.03  
3.03  
3.03  
3.02  
3.01  
3.00  
3.00  
2.99  
2.99  
2.98  
2.98  
2.97  
2.97  
2.96  
2.96  
2.95  
2.95  
2.94  
2.94

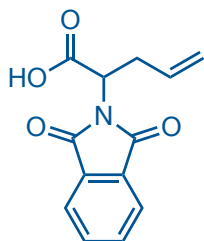

<sup>1</sup>H NMR of 1m (300 MHz, CDCl<sub>3</sub>)

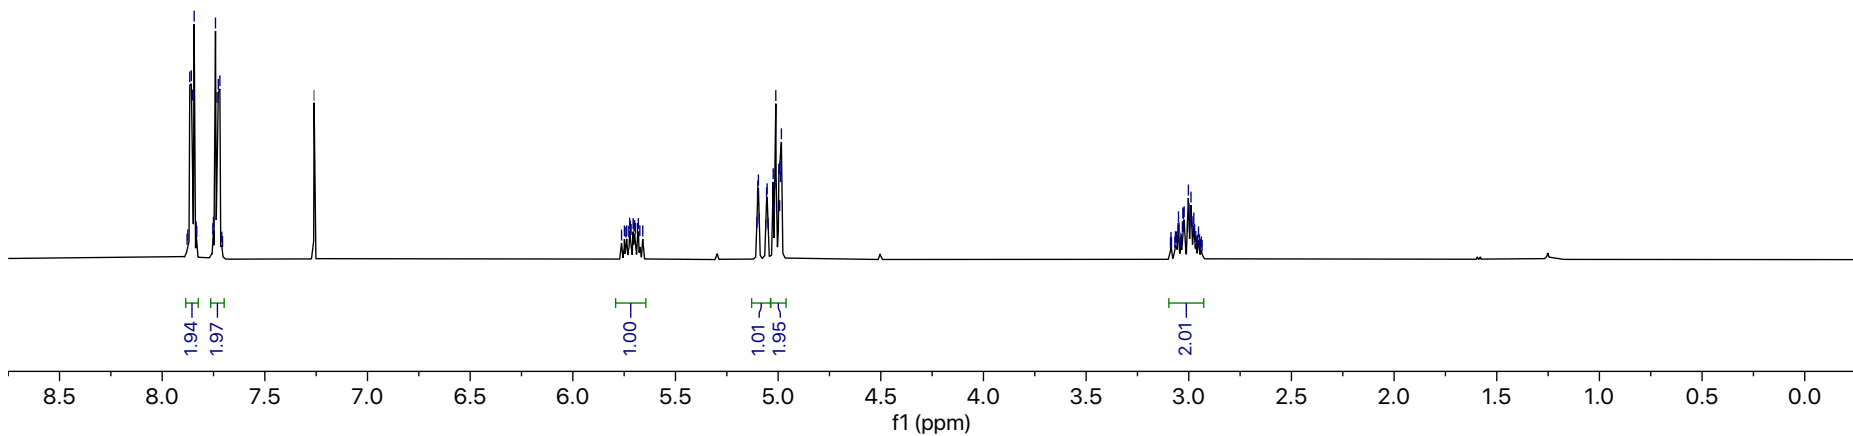

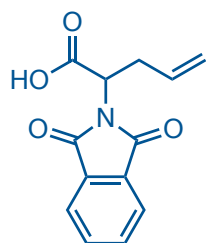

$^{13}\text{C}$  NMR of **1m** (101 MHz,  $\text{CDCl}_3$ )

—174.43

—167.59

—134.38

—133.02

—131.78

—123.76

—119.16

—77.16  $\text{CDCl}_3$

—51.49

—33.10

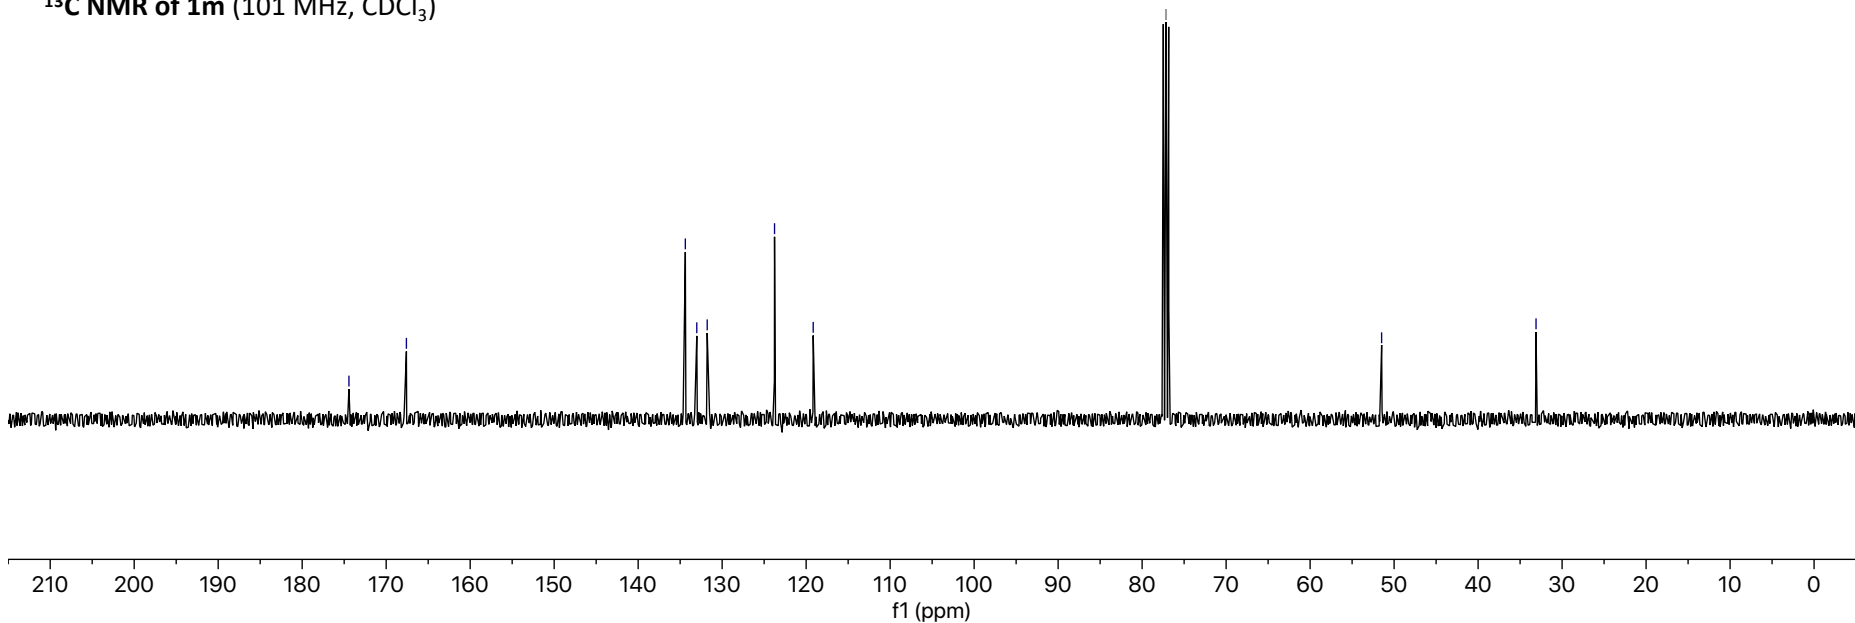

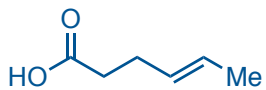

<sup>1</sup>H NMR of **1o** (300 MHz, CDCl<sub>3</sub>)

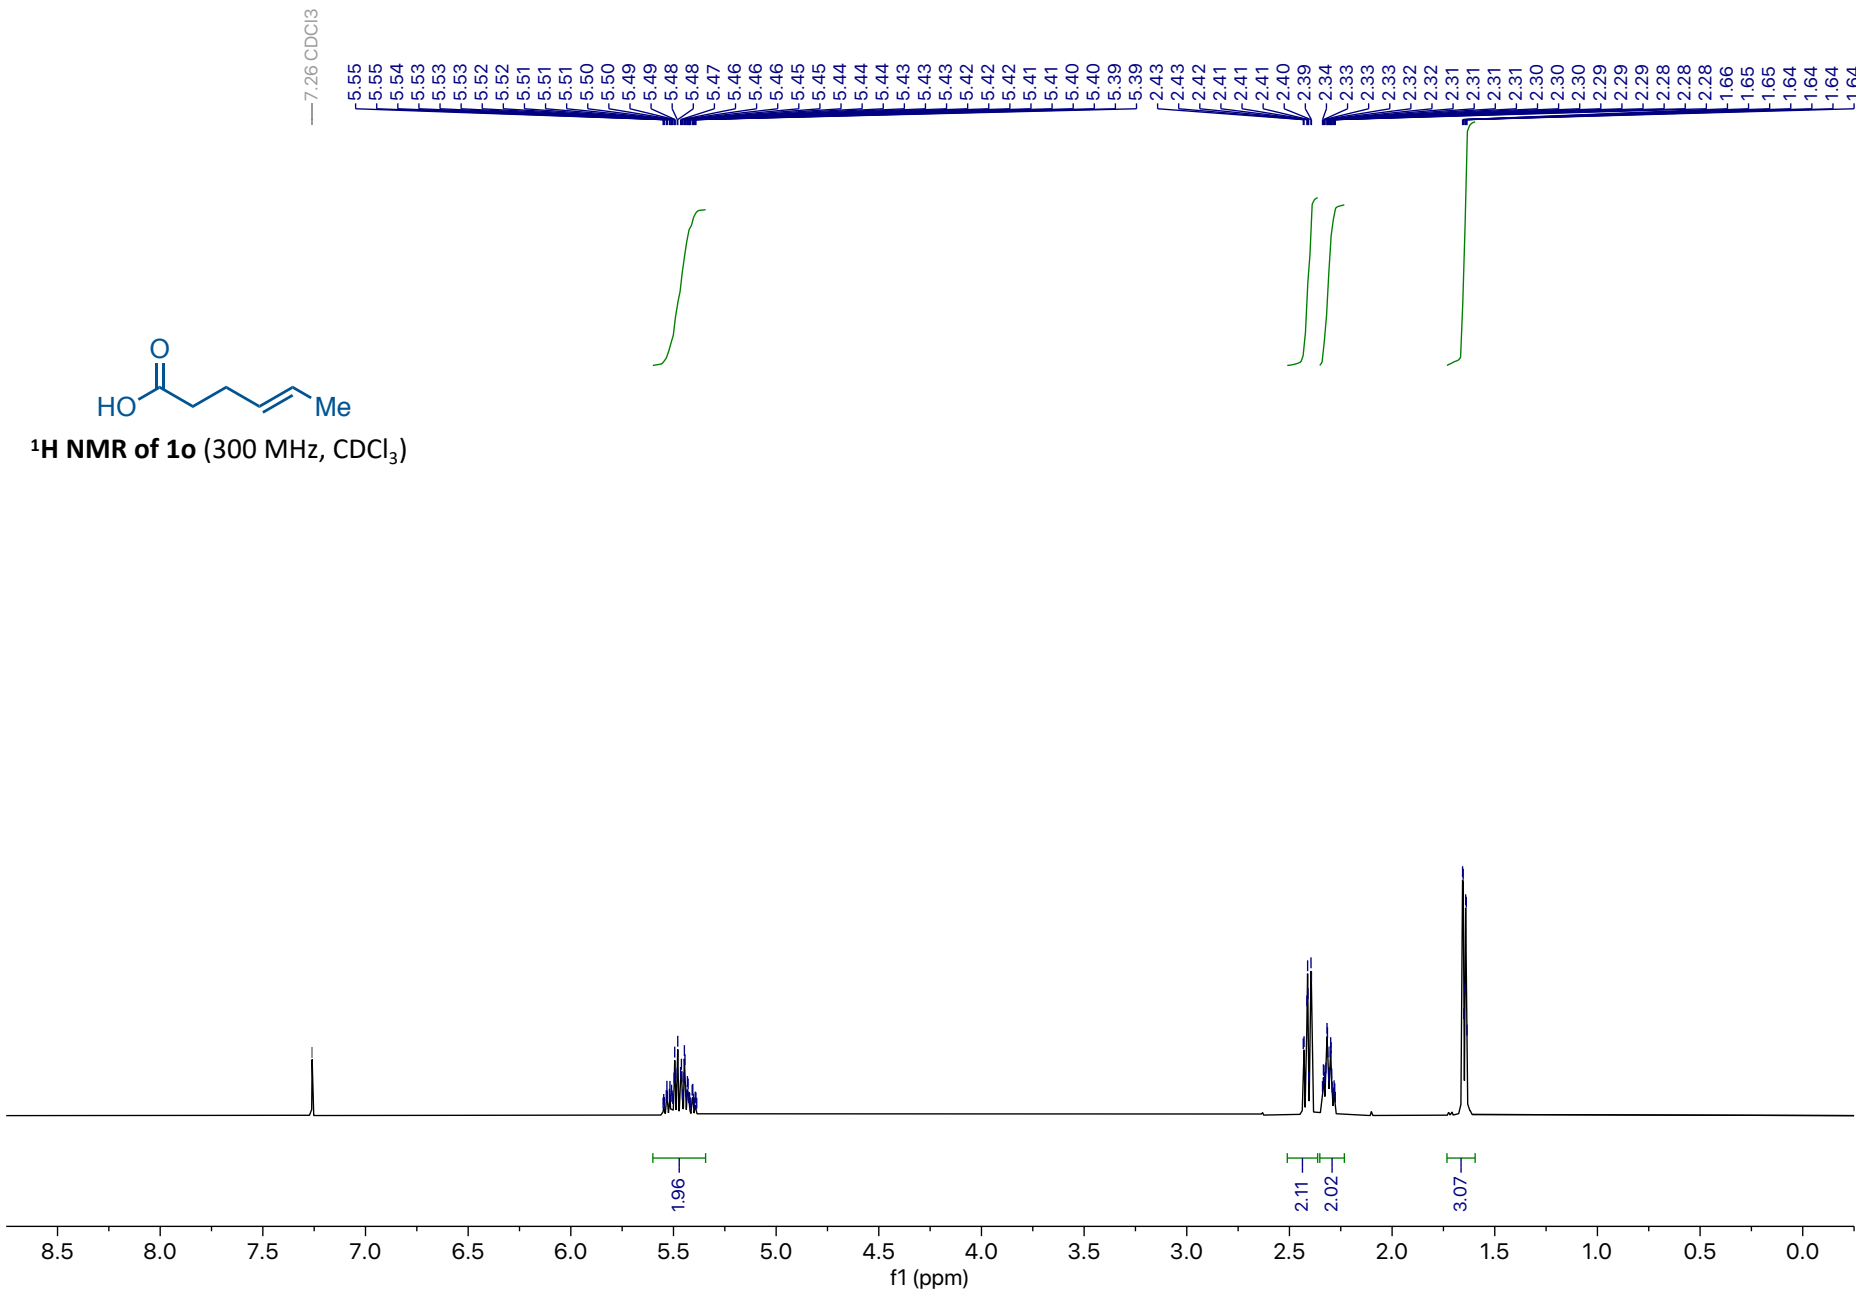

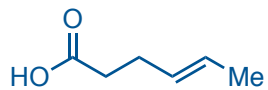

$^{13}\text{C}$  NMR of **1o** (101 MHz,  $\text{CDCl}_3$ )

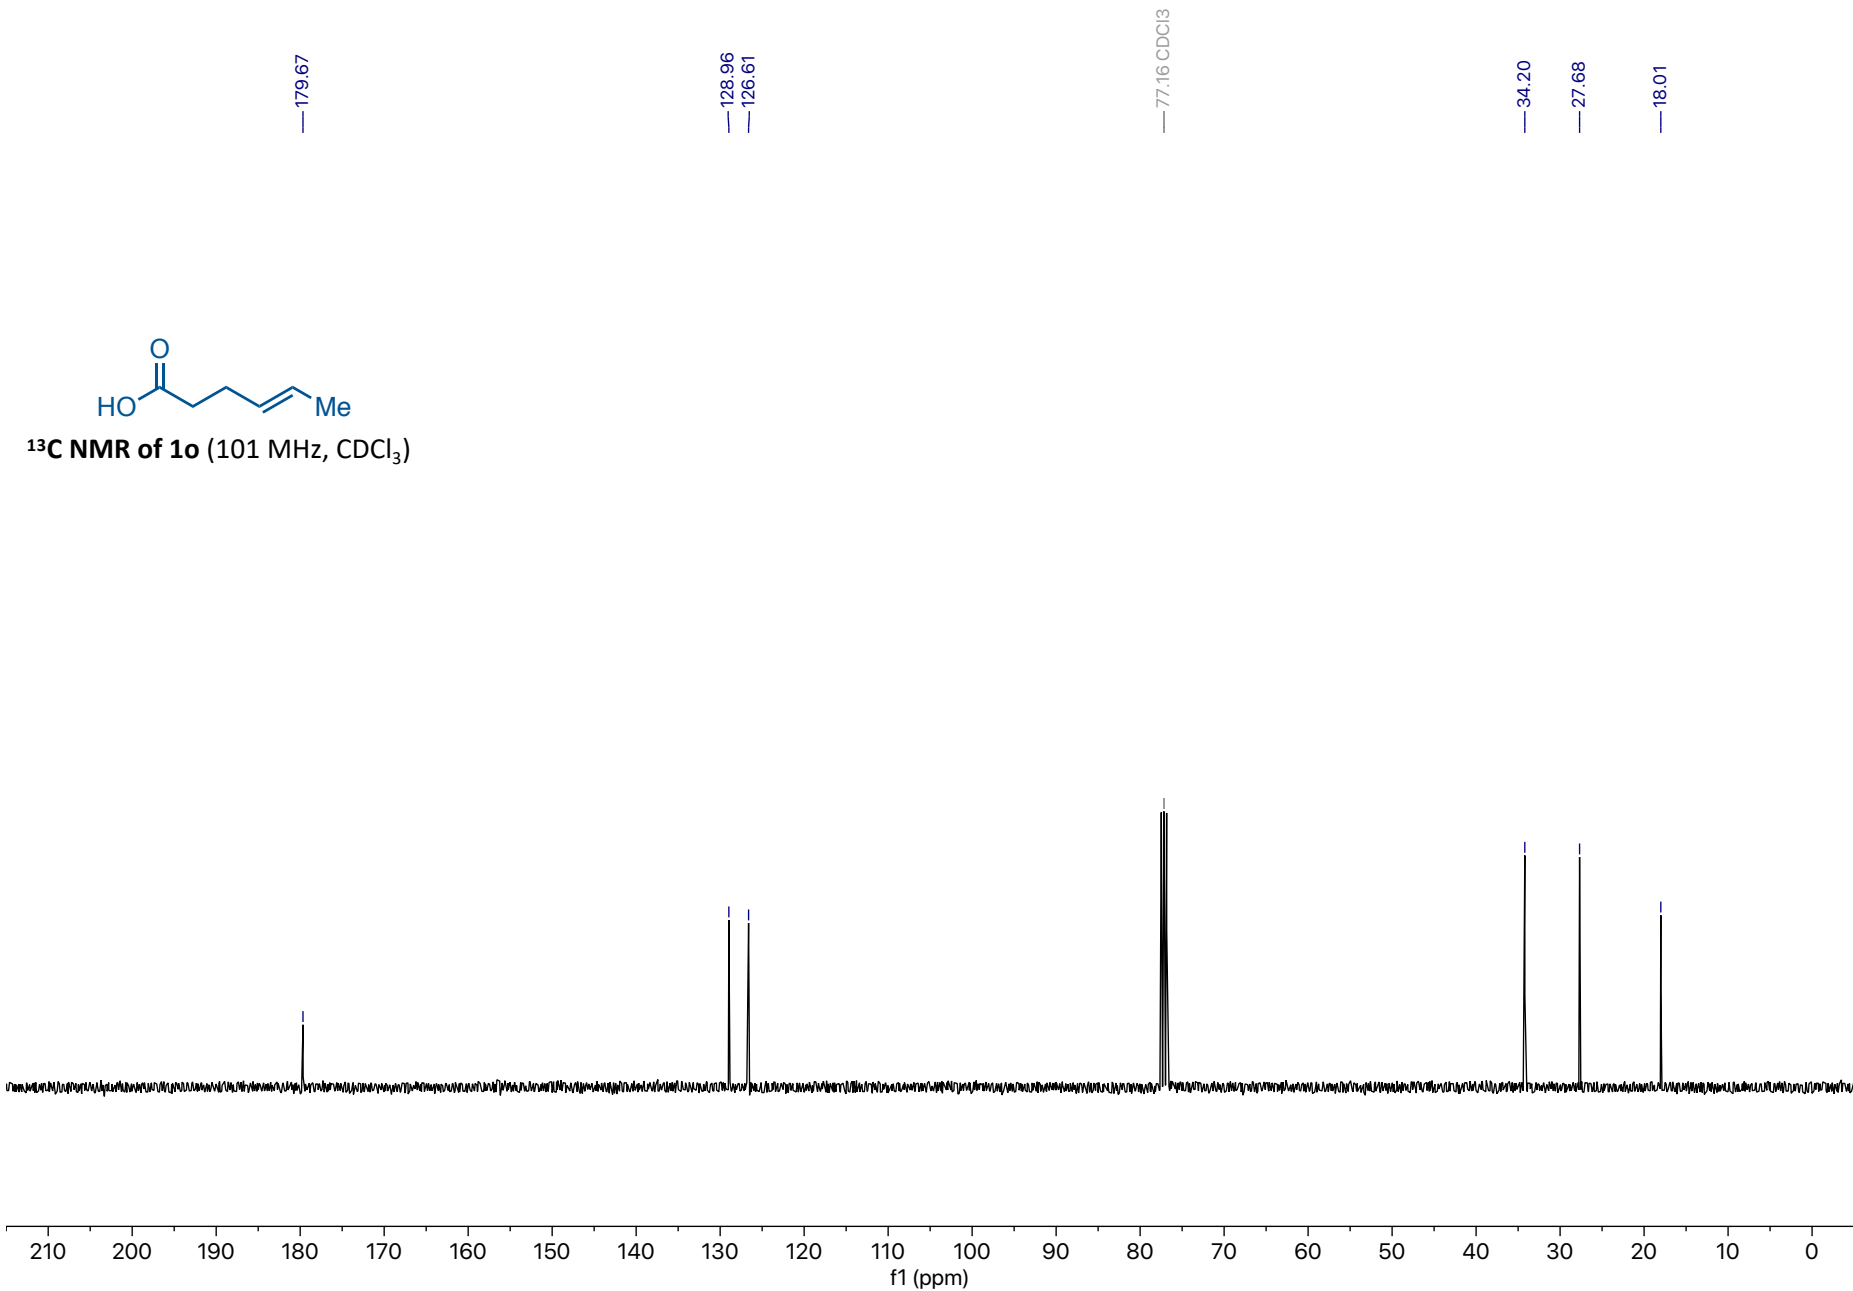

7.26 CDCl3

5.56  
5.56  
5.56  
5.55  
5.54  
5.54  
5.53  
5.53  
5.52  
5.52  
5.51  
5.51  
5.51  
5.50  
5.50  
5.49  
5.49  
5.48  
5.48  
5.41  
5.40  
5.40  
5.40  
5.40  
5.39  
5.39  
5.38  
5.38  
5.37  
5.36  
5.36  
5.35  
5.35  
5.34  
5.34  
5.33  
2.44  
2.44  
2.43  
2.43  
2.43  
2.41  
2.41  
2.40  
2.40  
2.39  
2.39  
2.39  
2.39  
2.38  
2.38  
2.37  
2.37  
2.37  
2.37  
2.36  
2.36  
2.36  
2.35  
2.35  
2.35  
2.34  
2.34  
1.66  
1.65  
1.65  
1.64  
1.64  
1.64  
1.63  
1.63  
1.62  
1.62  
1.62

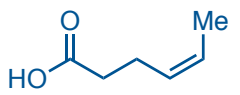

<sup>1</sup>H NMR of 1p (300 MHz, CDCl<sub>3</sub>)

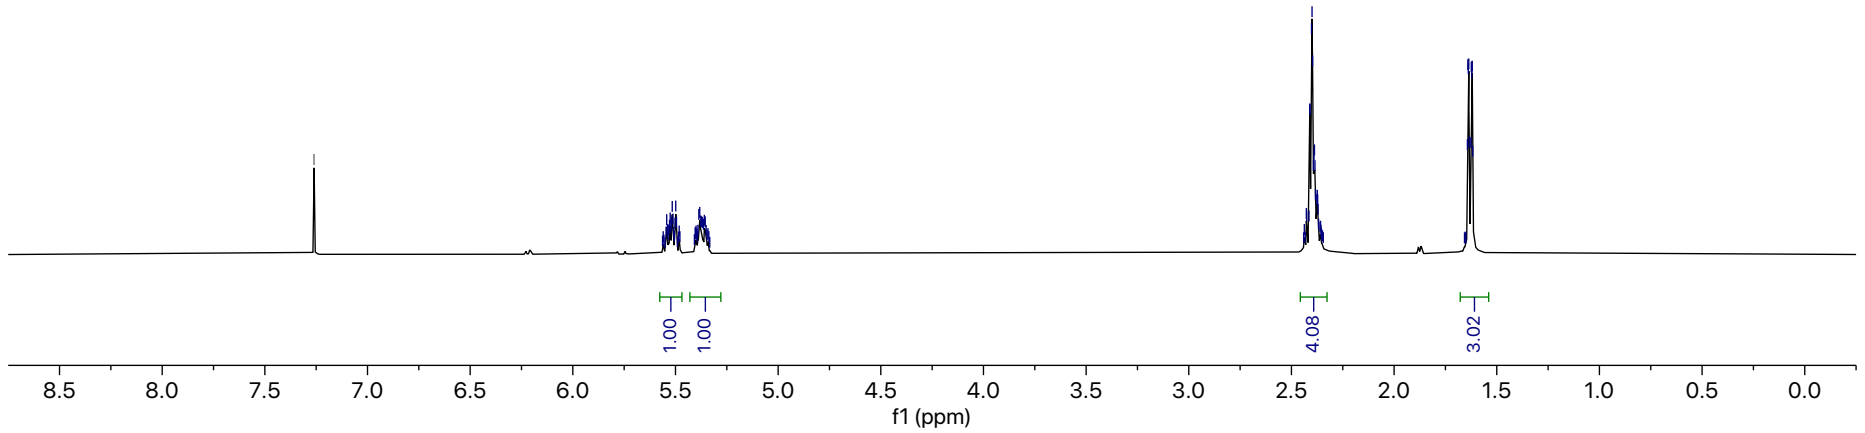



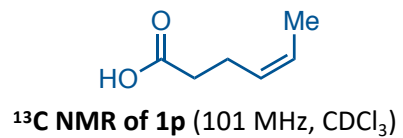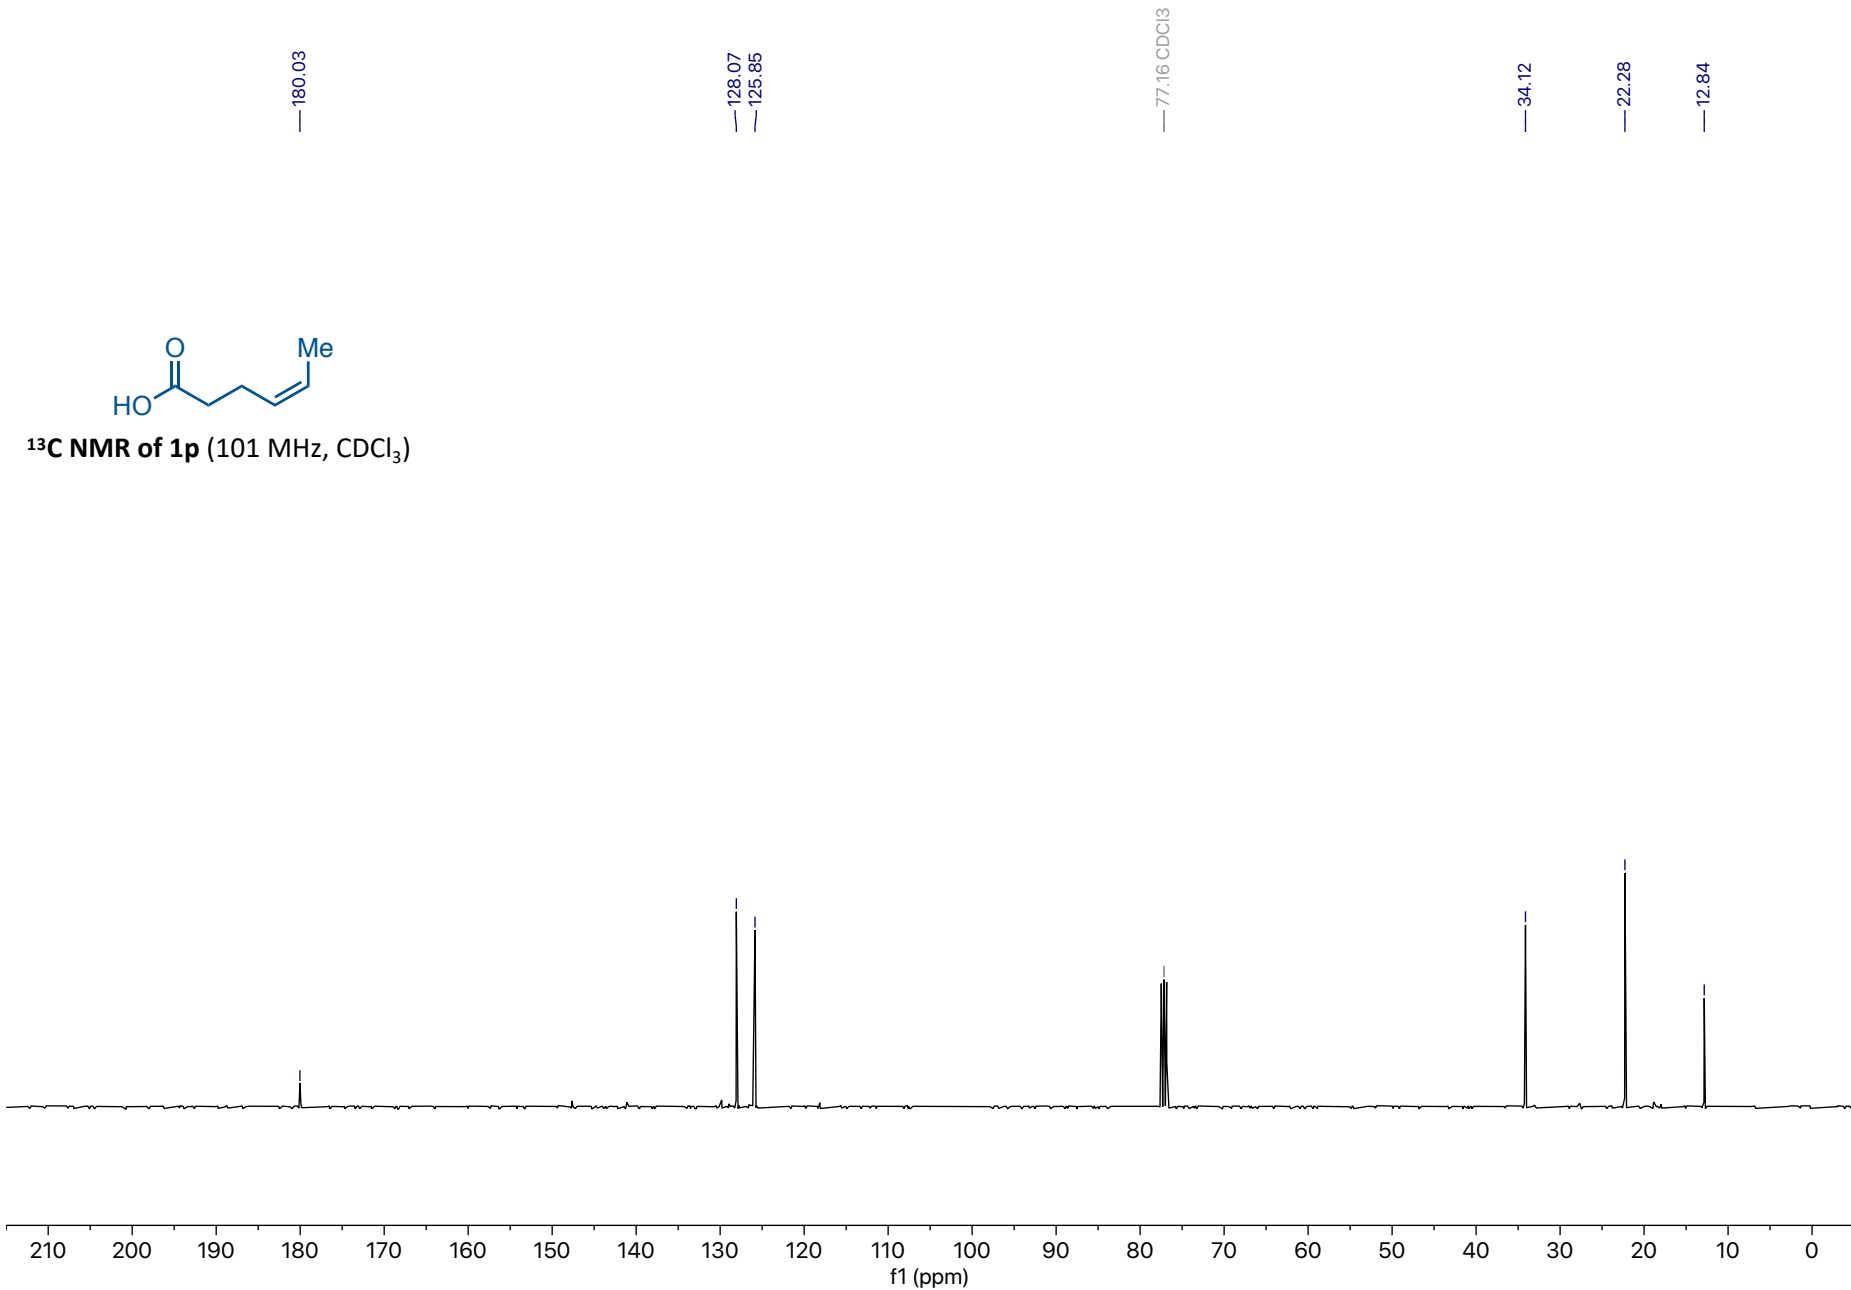

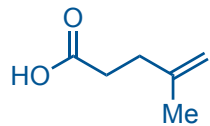

<sup>1</sup>H NMR of 1q (300 MHz, CDCl<sub>3</sub>)

— 7.26 CDCl<sub>3</sub>

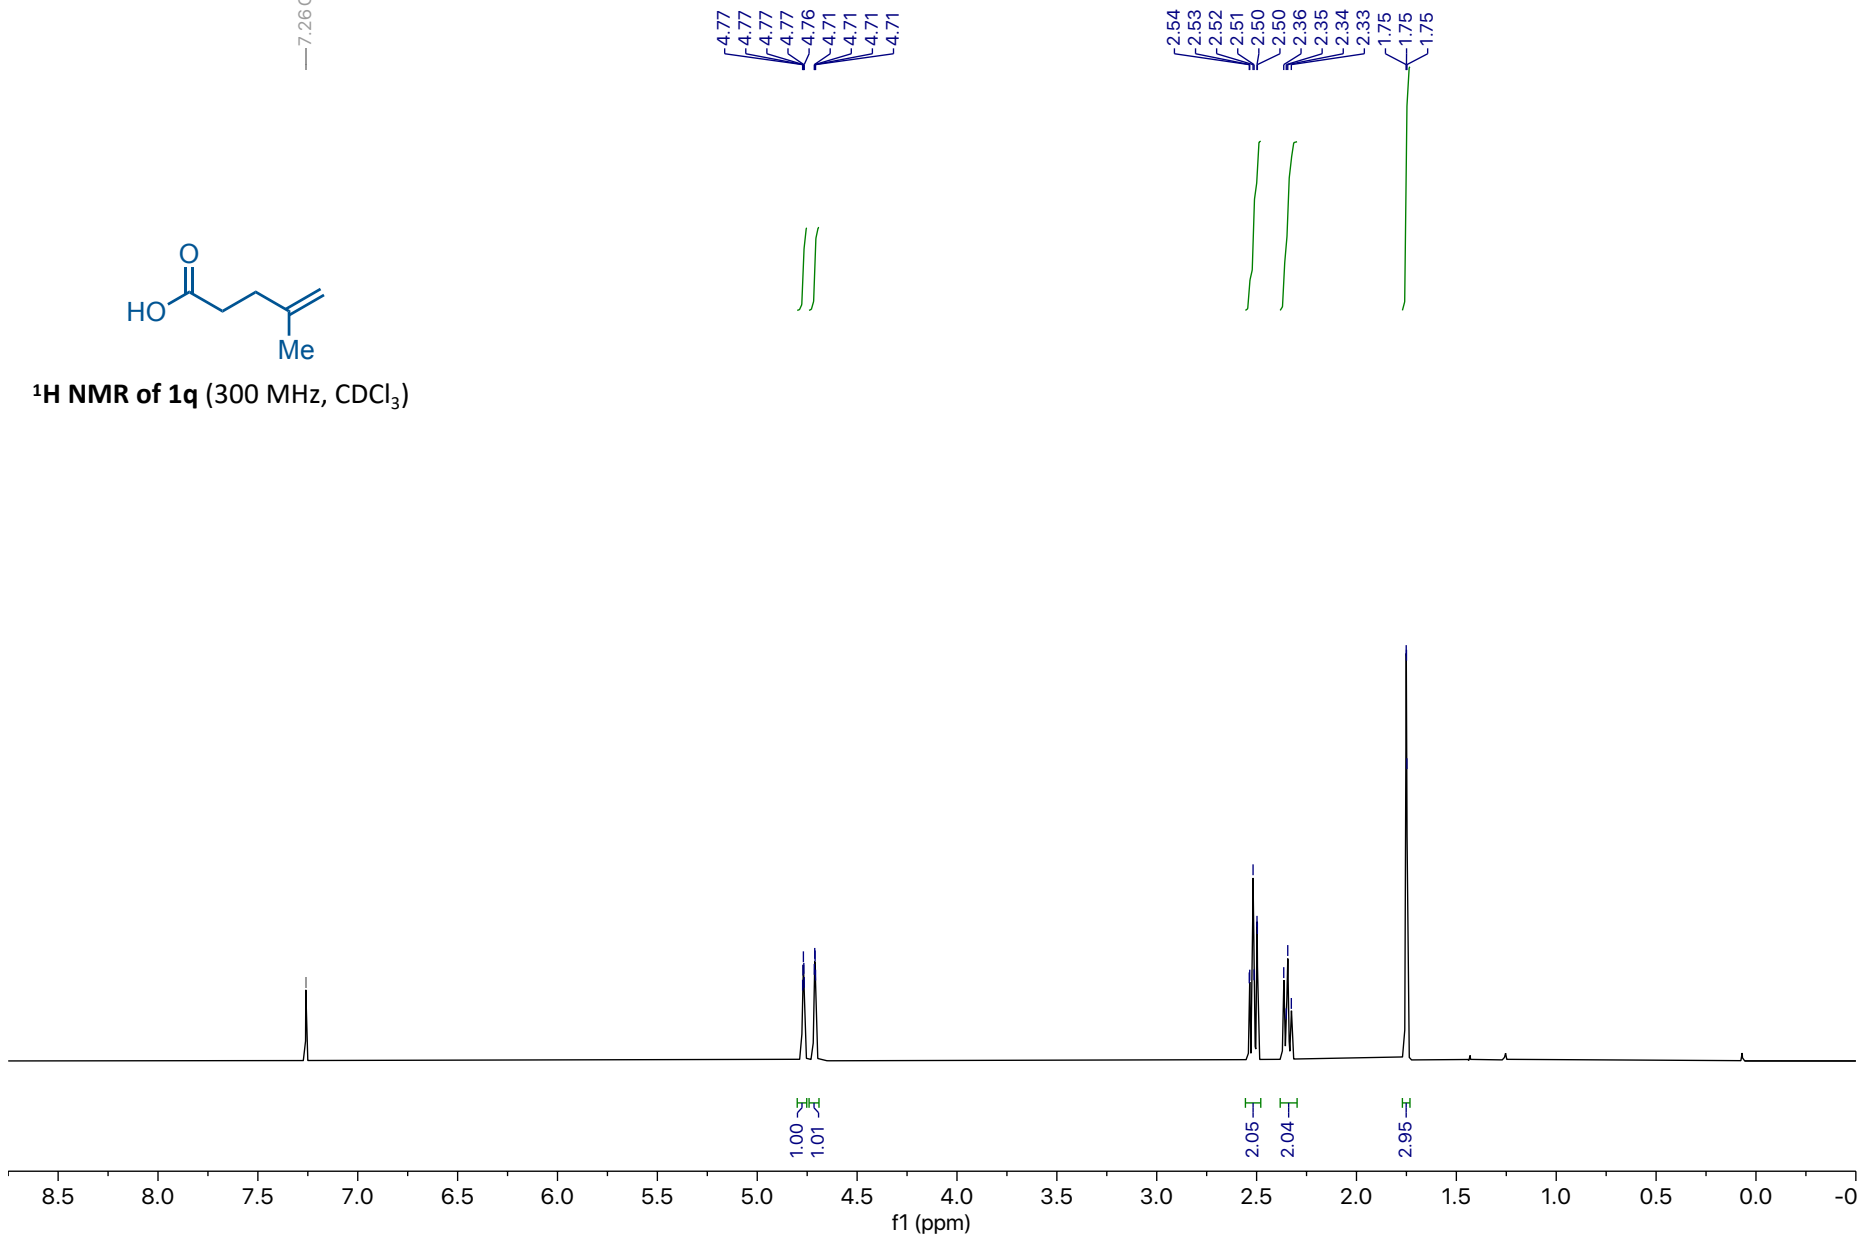

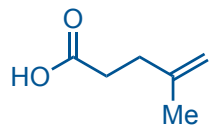

$^{13}\text{C}$  NMR of **1q** (101 MHz,  $\text{CDCl}_3$ )

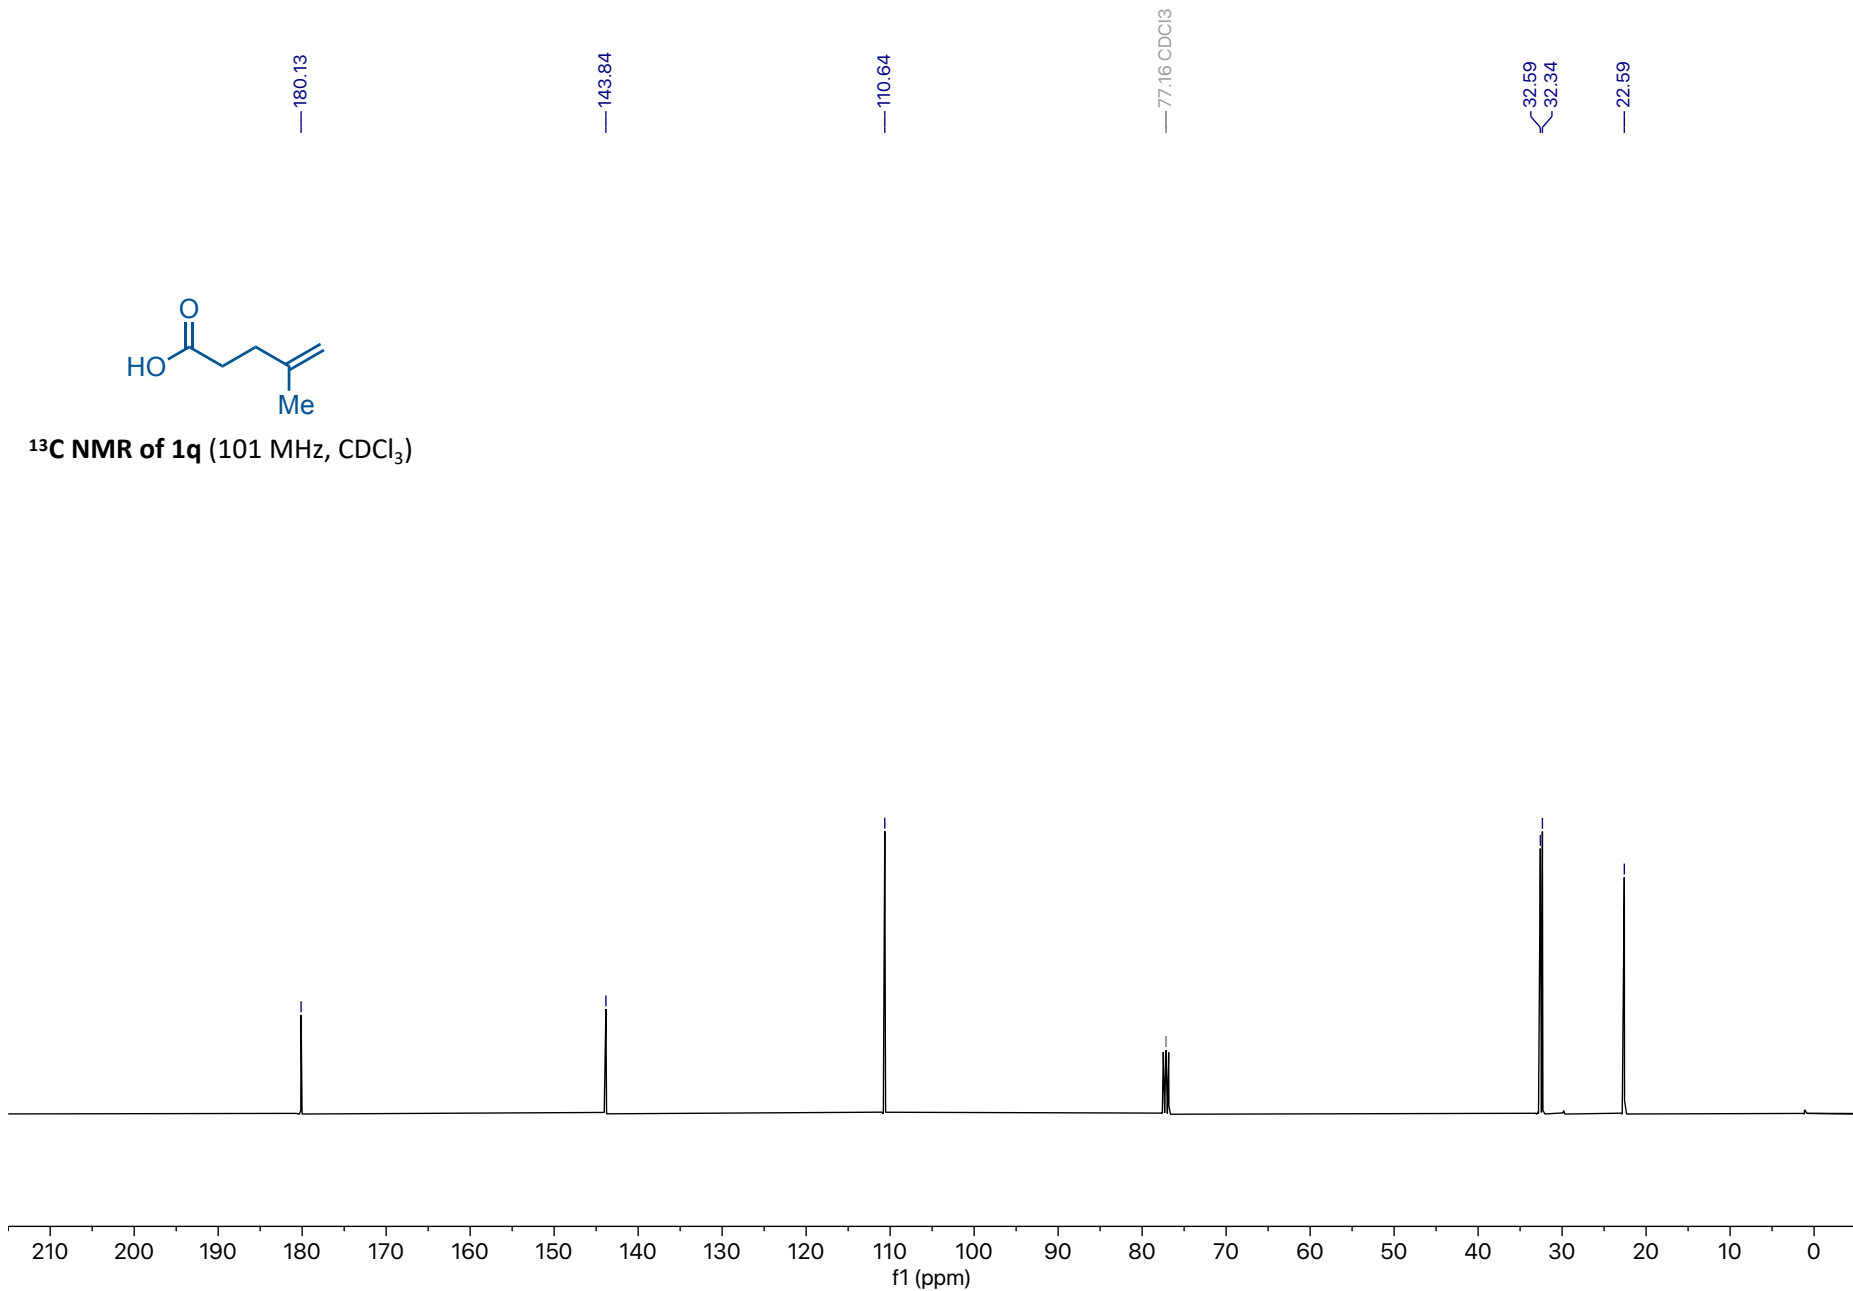

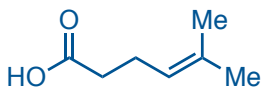

<sup>1</sup>H NMR of 1r (300 MHz, CDCl<sub>3</sub>)

— 7.26 CDCl<sub>3</sub>

5.13  
5.12  
5.12  
5.11  
5.11  
5.10  
5.10  
5.09  
5.08  
5.08  
5.07

2.39  
2.38  
2.38  
2.37  
2.36  
2.35  
2.35  
2.33  
2.33  
2.32  
2.32  
2.30  
2.30  
2.30  
2.29  
2.29  
1.69  
1.68  
1.68  
1.62

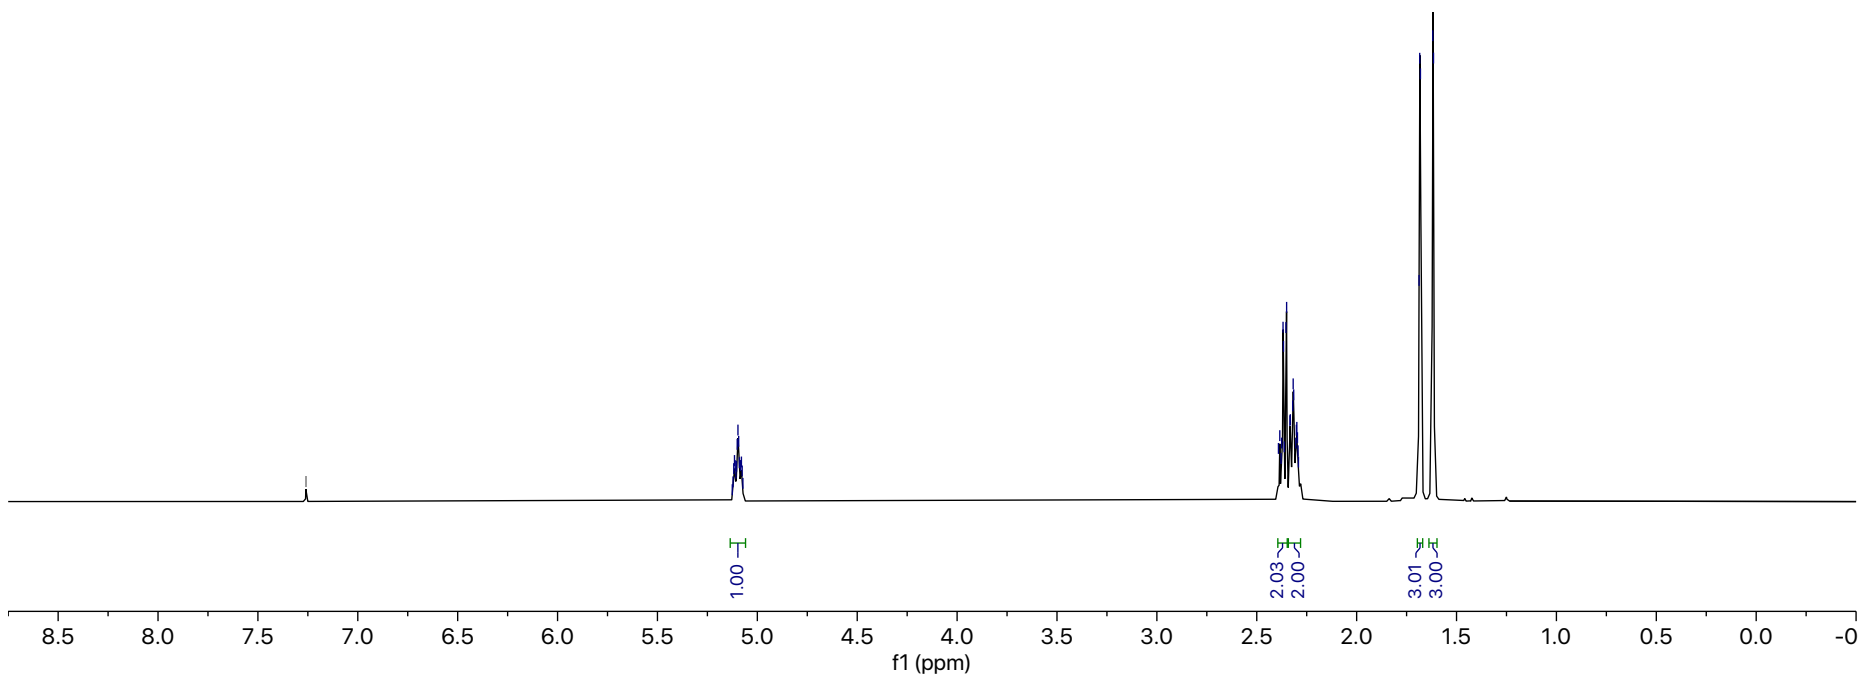



<sup>13</sup>C NMR of **1r** (101 MHz, CDCl<sub>3</sub>)

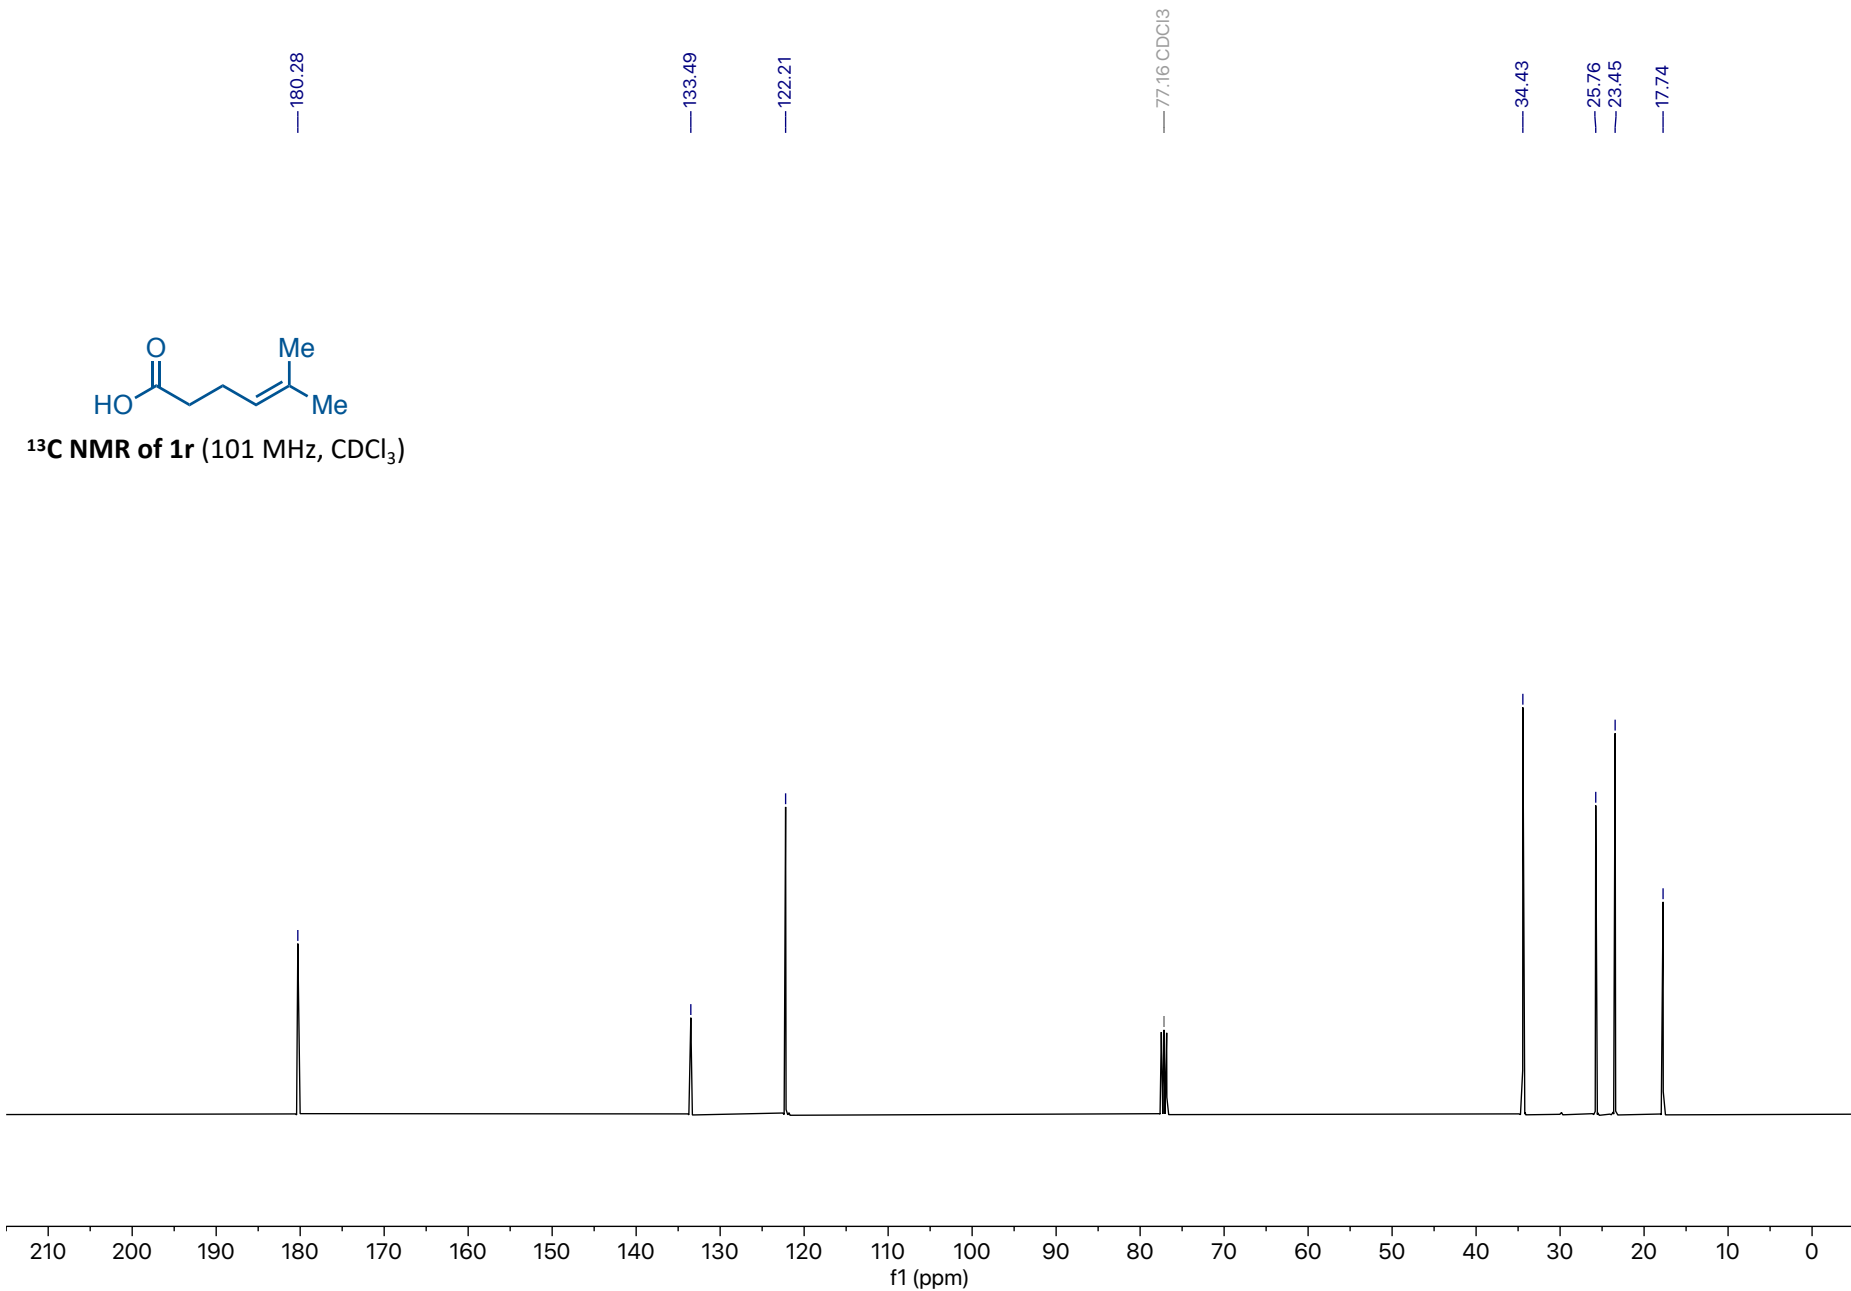

— 7.26 CDCl<sub>3</sub>

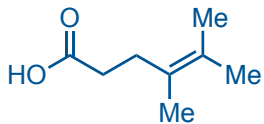

<sup>1</sup>H NMR of 1s (300 MHz, CDCl<sub>3</sub>)

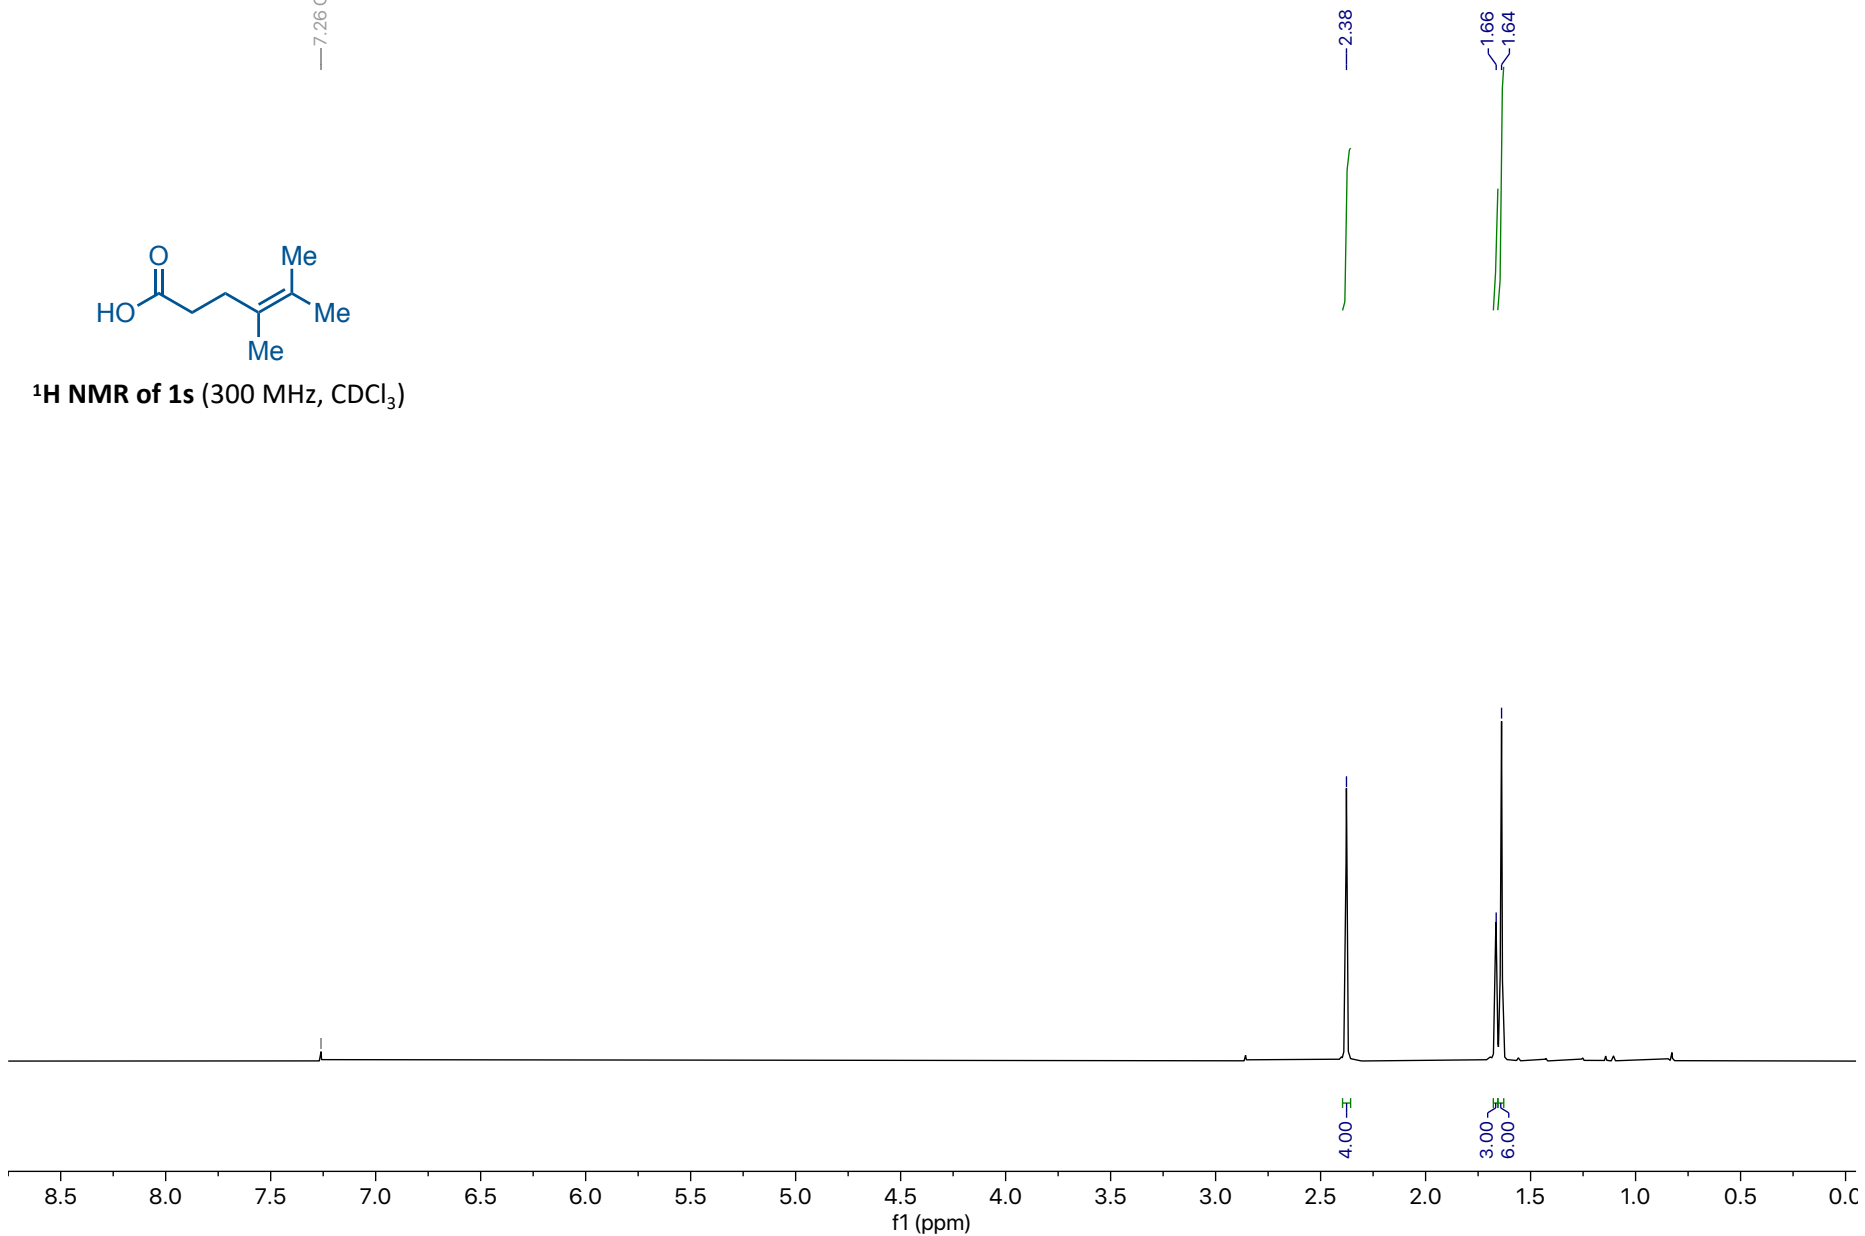

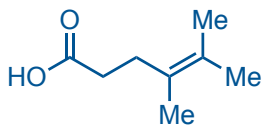

<sup>13</sup>C NMR of 1s (101 MHz, CDCl<sub>3</sub>)

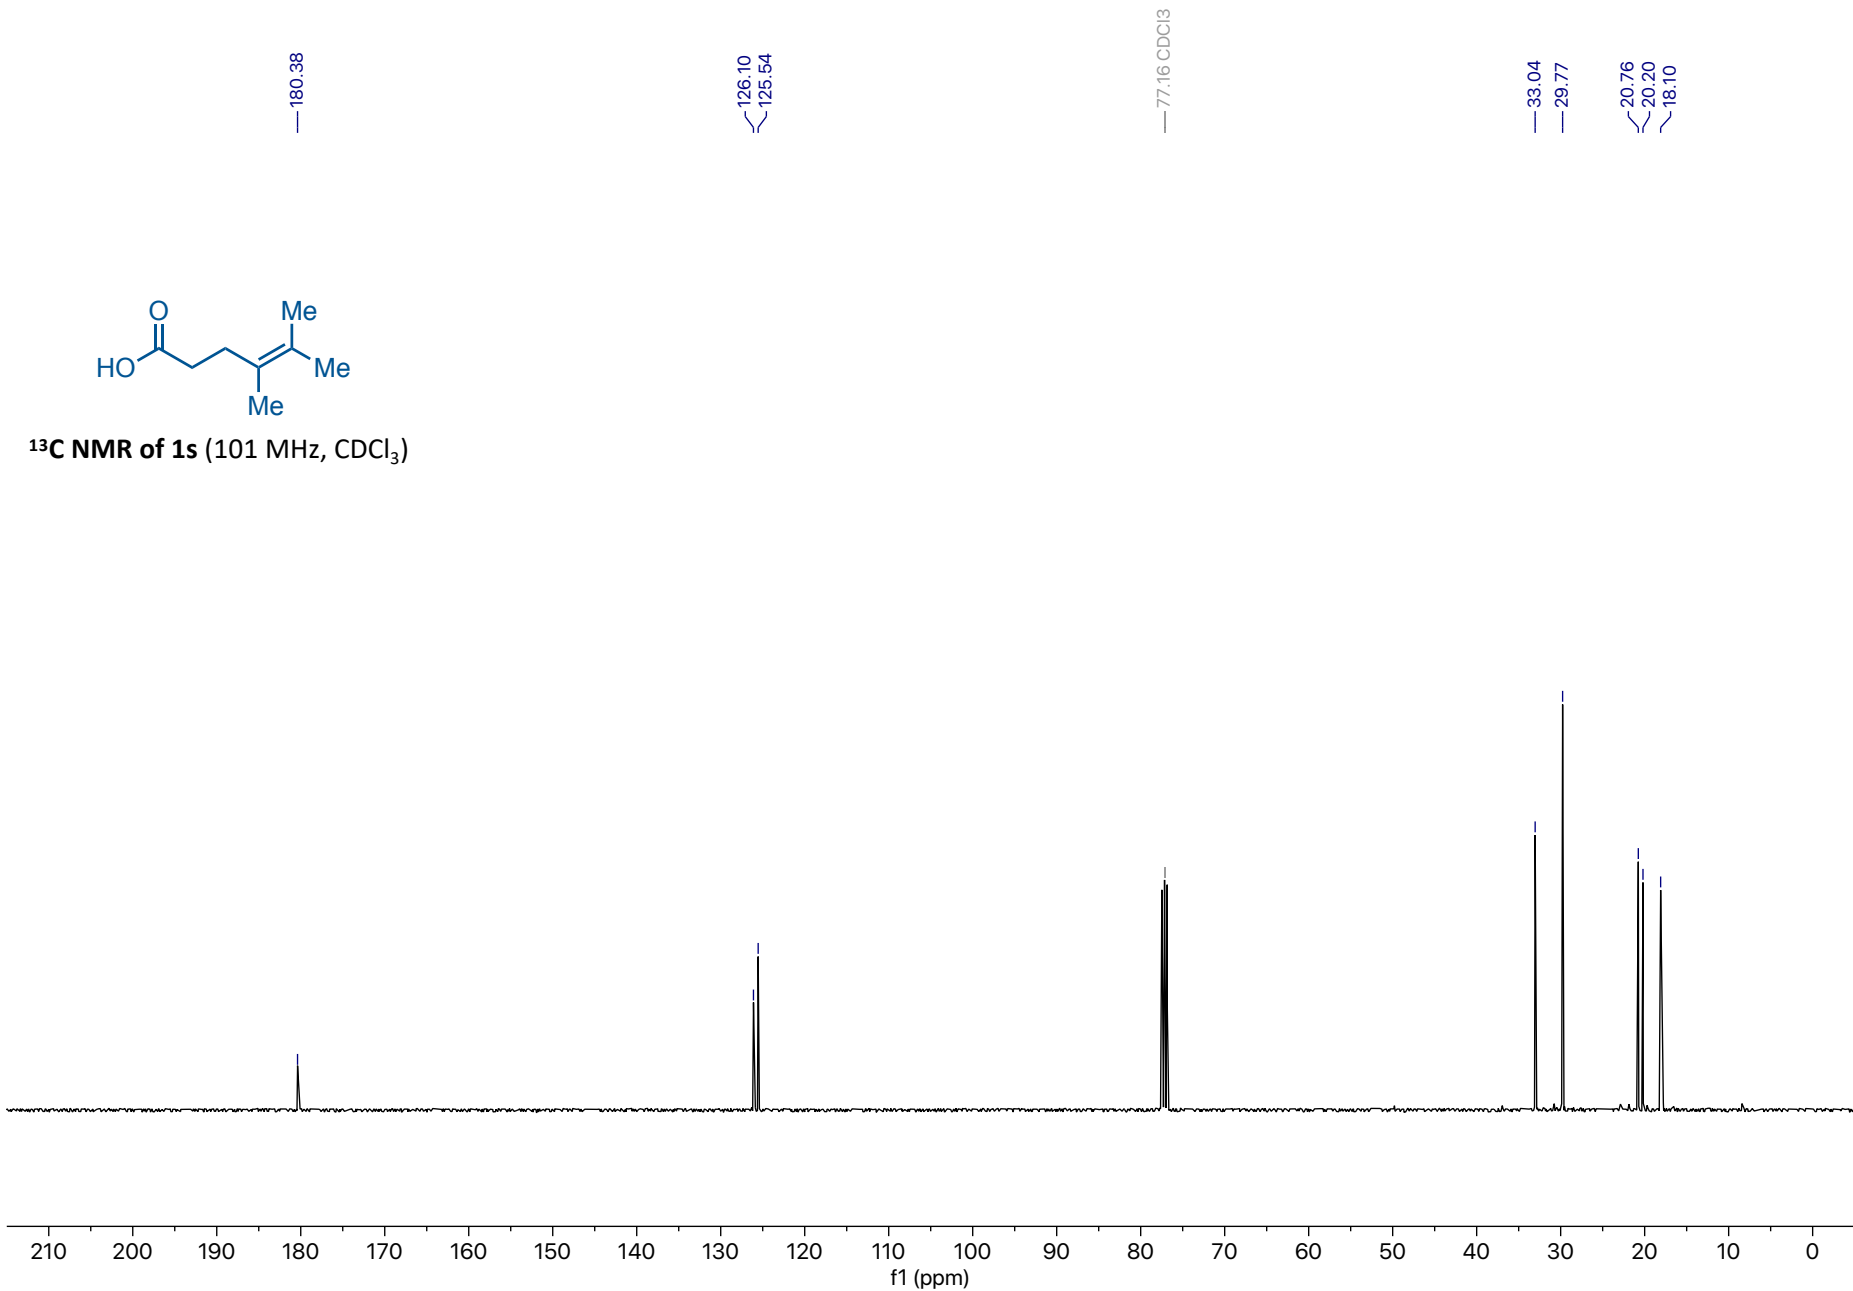

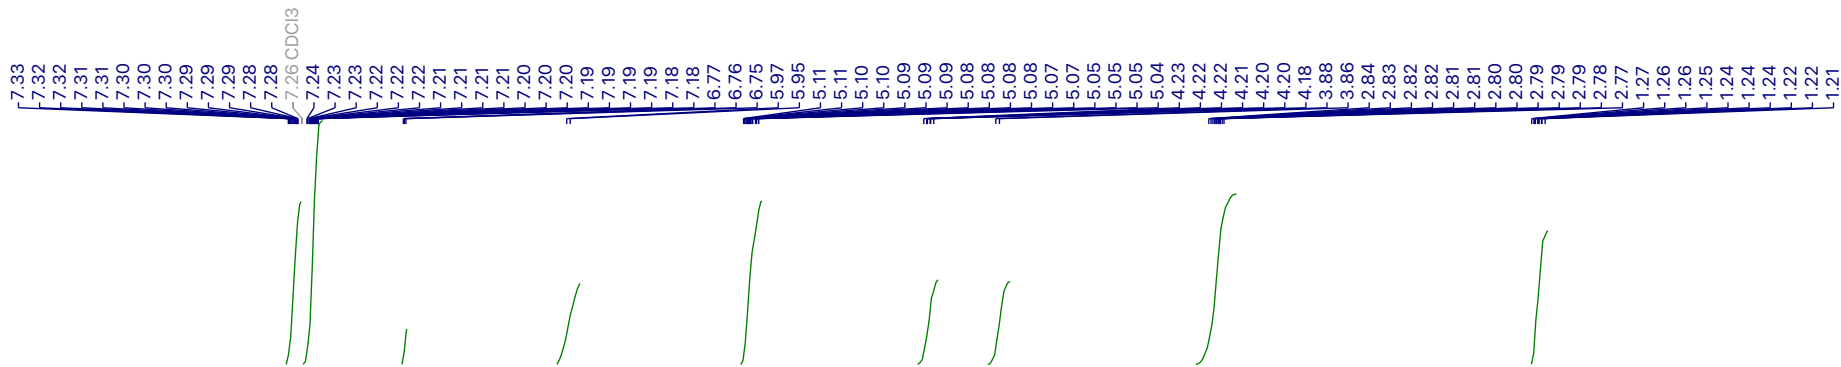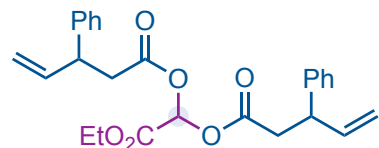

$^1\text{H}$  NMR of 4 (400 MHz,  $\text{CDCl}_3$ )

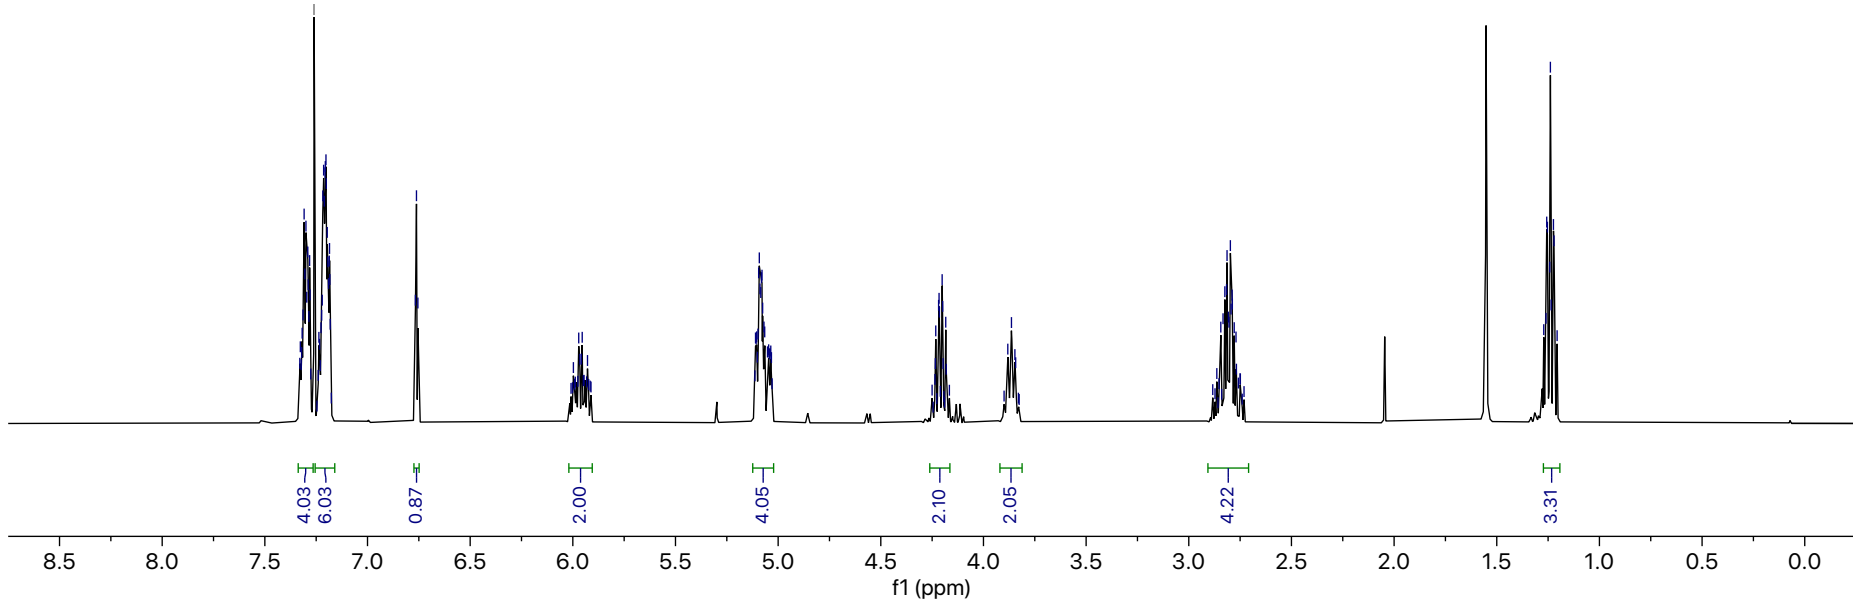



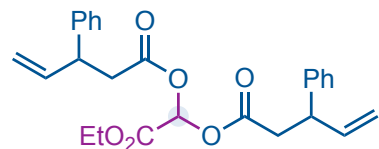

<sup>13</sup>C NMR of 4 (101 MHz, CDCl<sub>3</sub>)

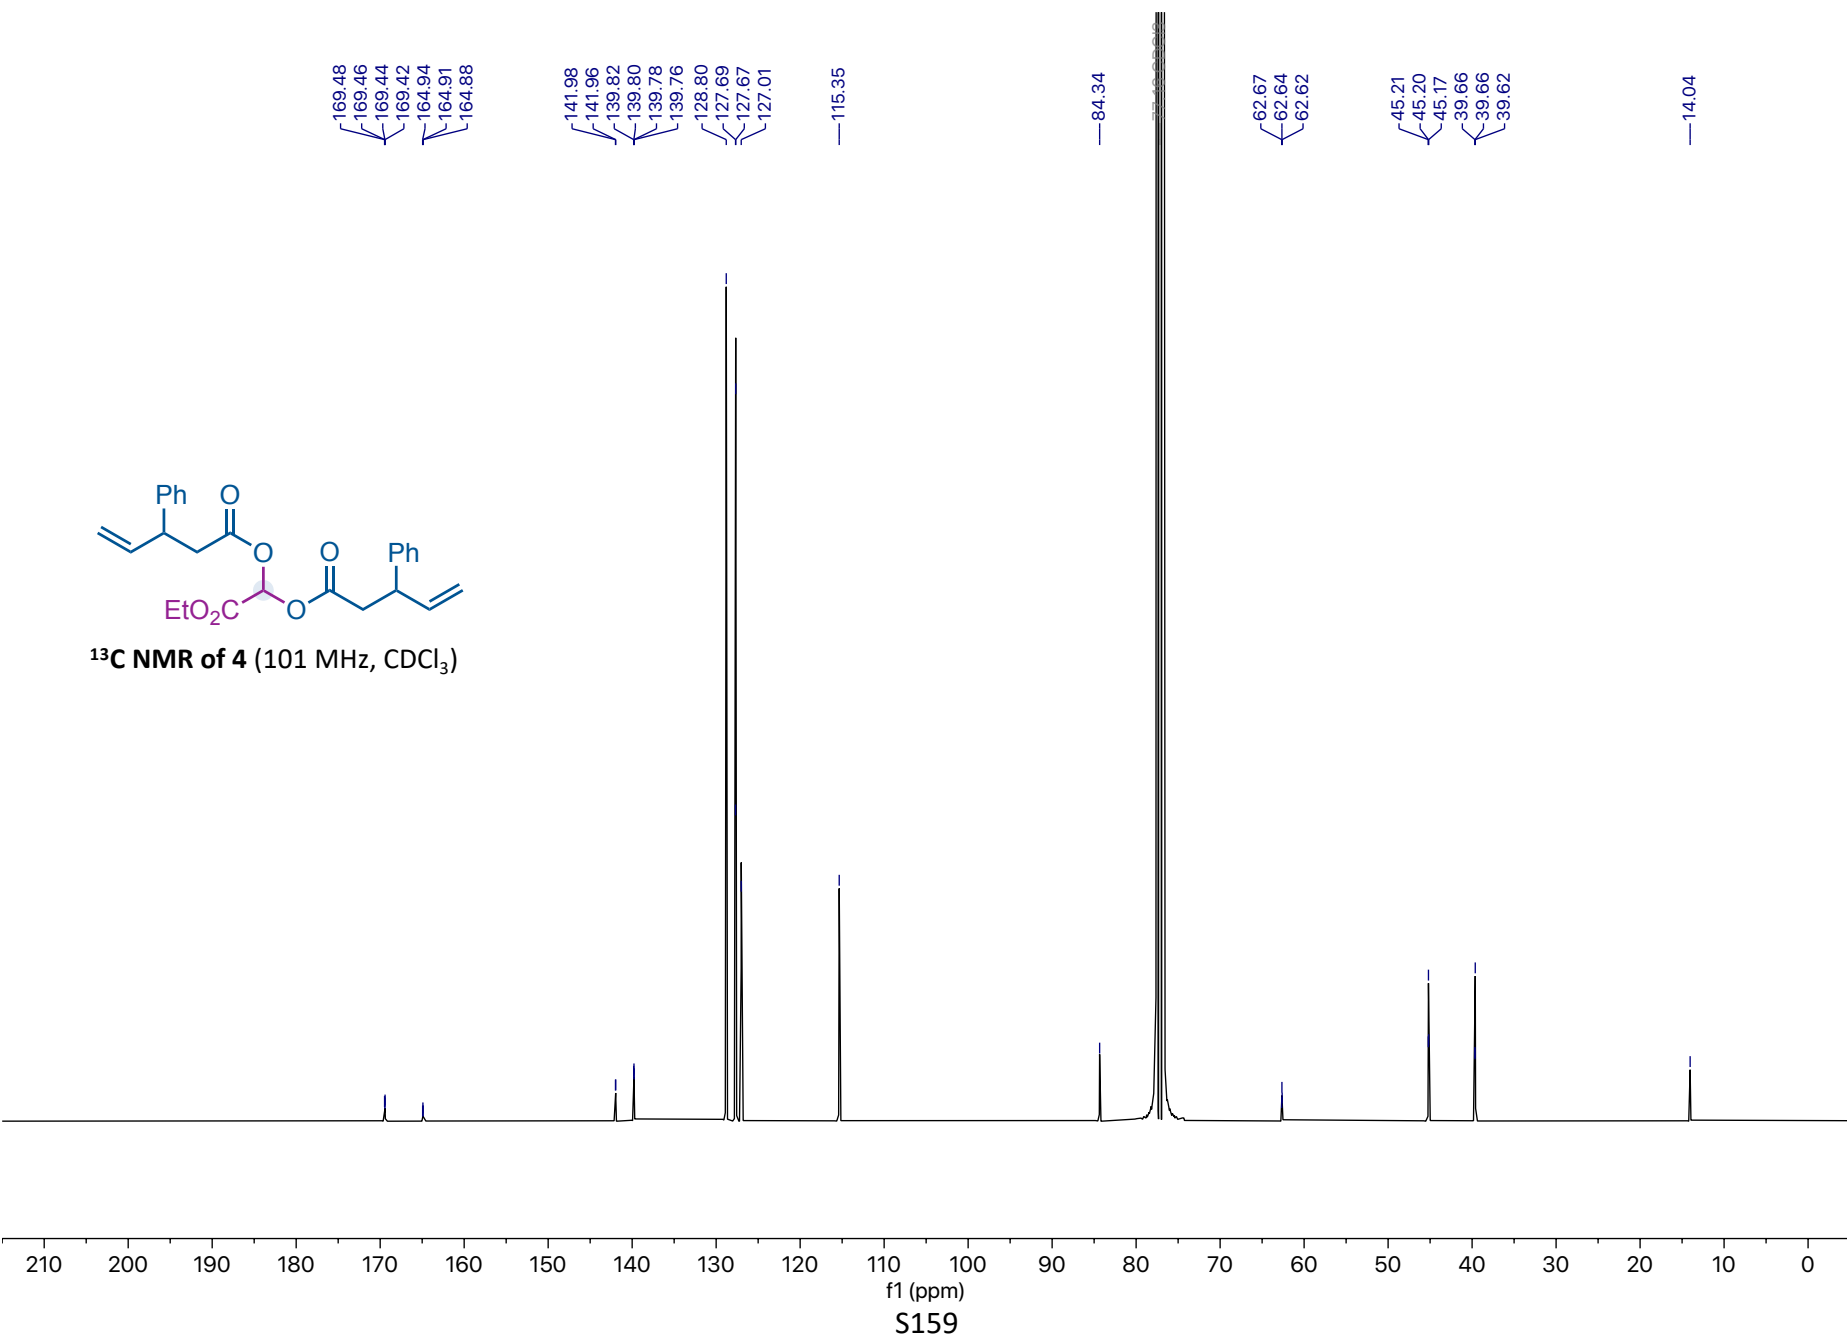

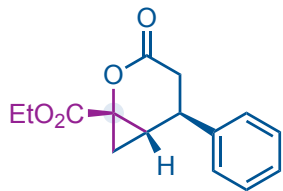

<sup>1</sup>H NMR of 3a (400 MHz, CDCl<sub>3</sub>)

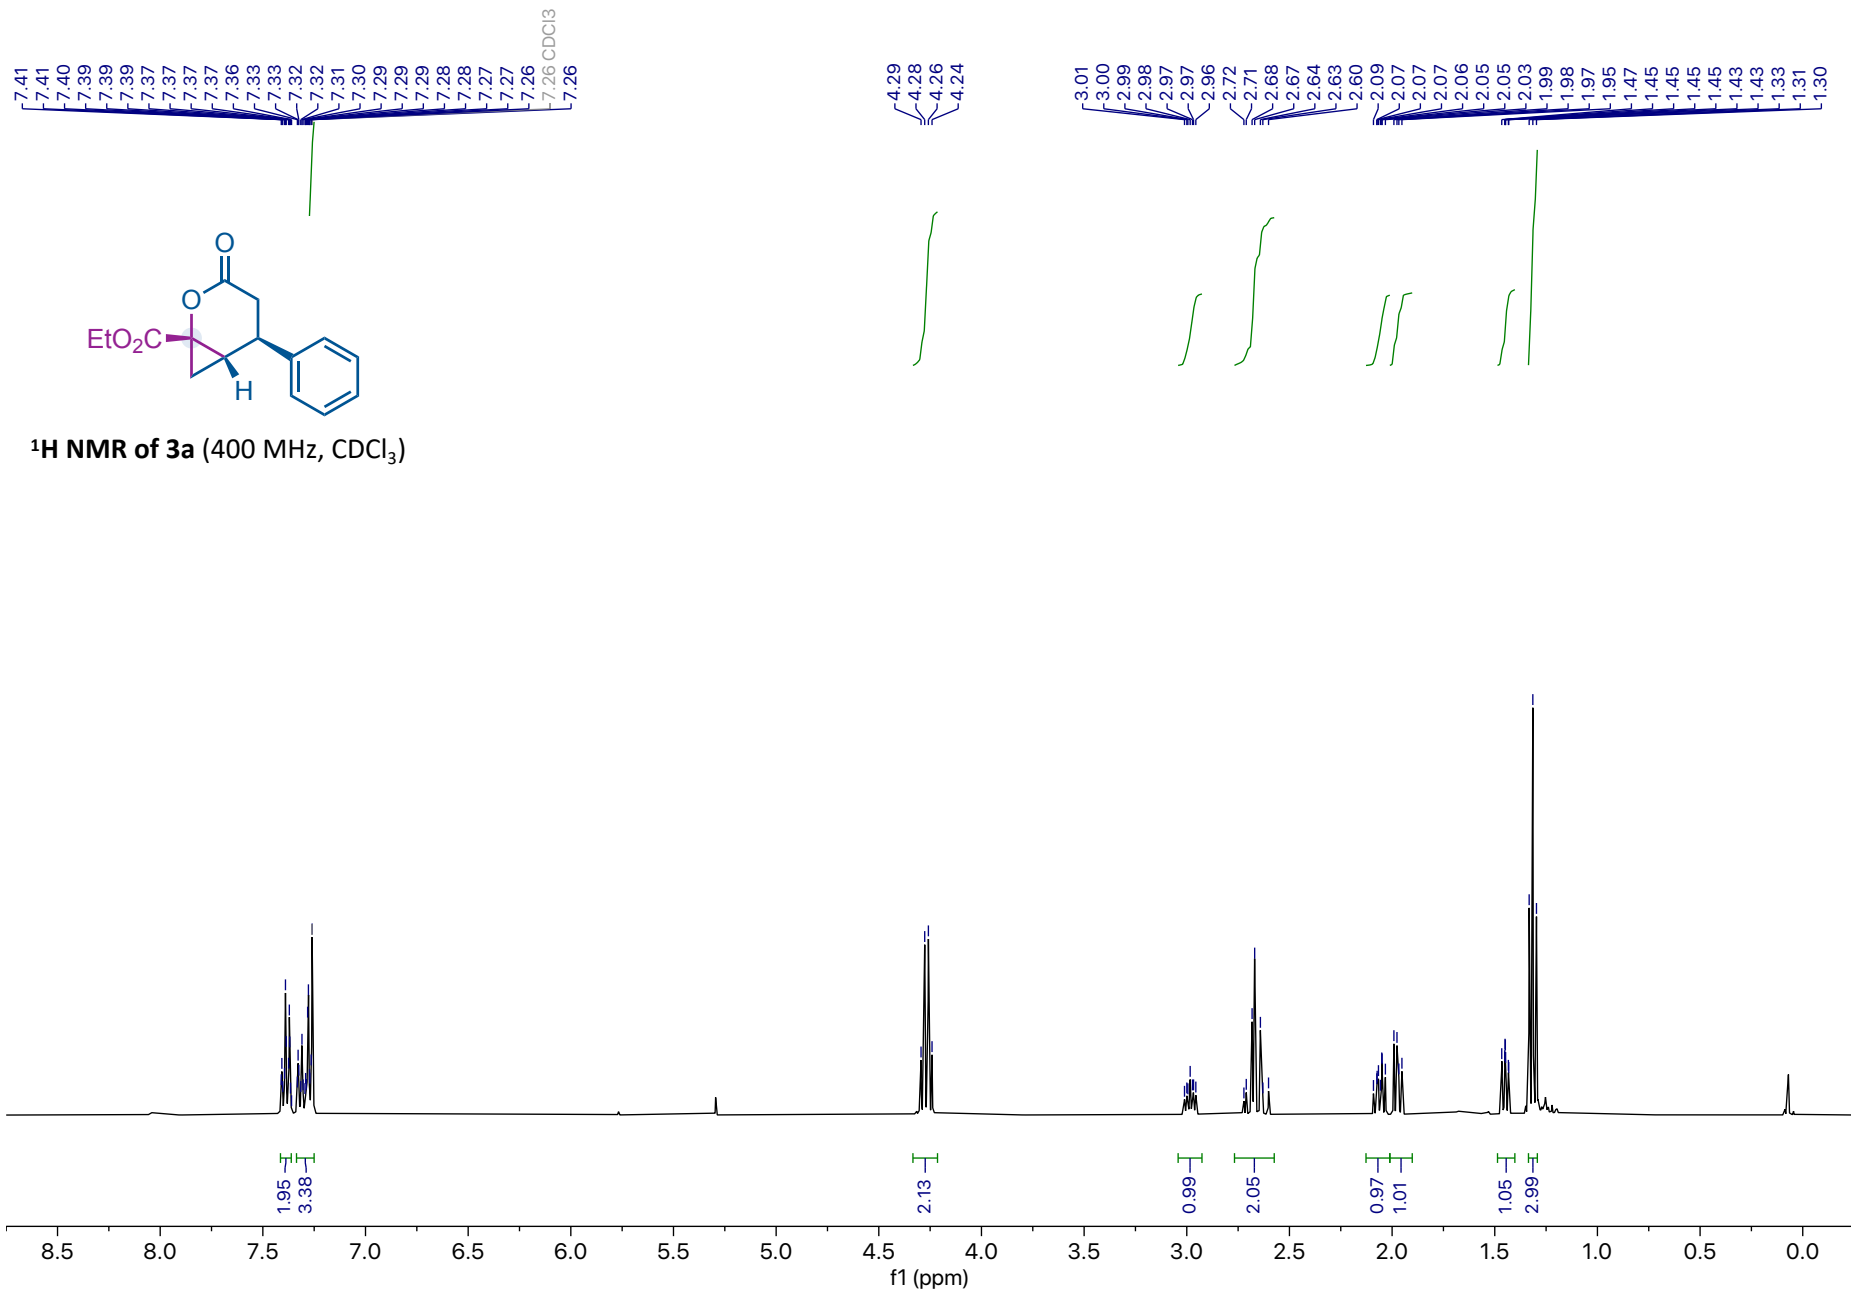

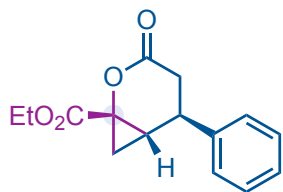

<sup>13</sup>C NMR of 3a (101 MHz, CDCl<sub>3</sub>)

170.81  
170.28

141.02

129.32  
127.83  
126.85

77.16 CDCl<sub>3</sub>

62.33  
61.73

41.74

35.83

28.63

24.30

14.31

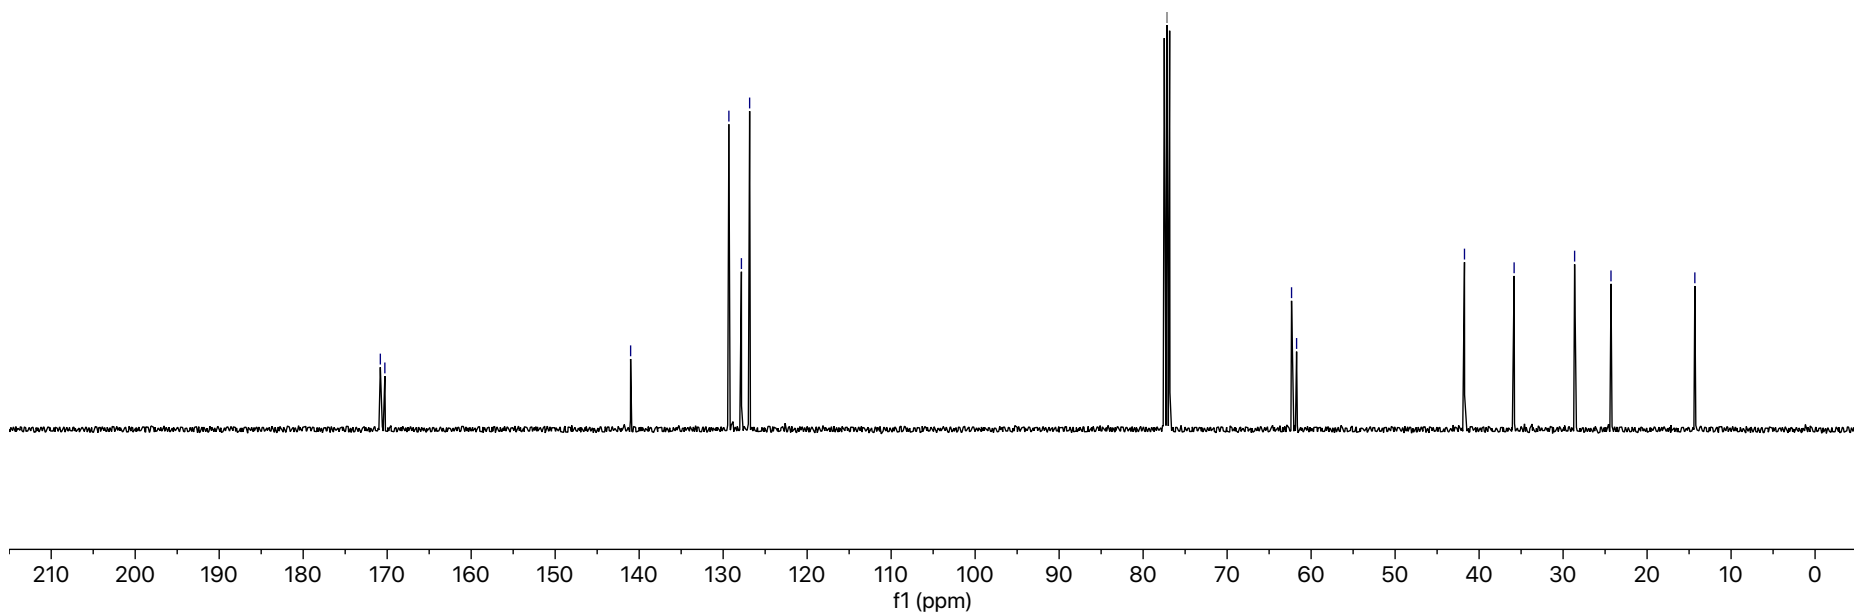

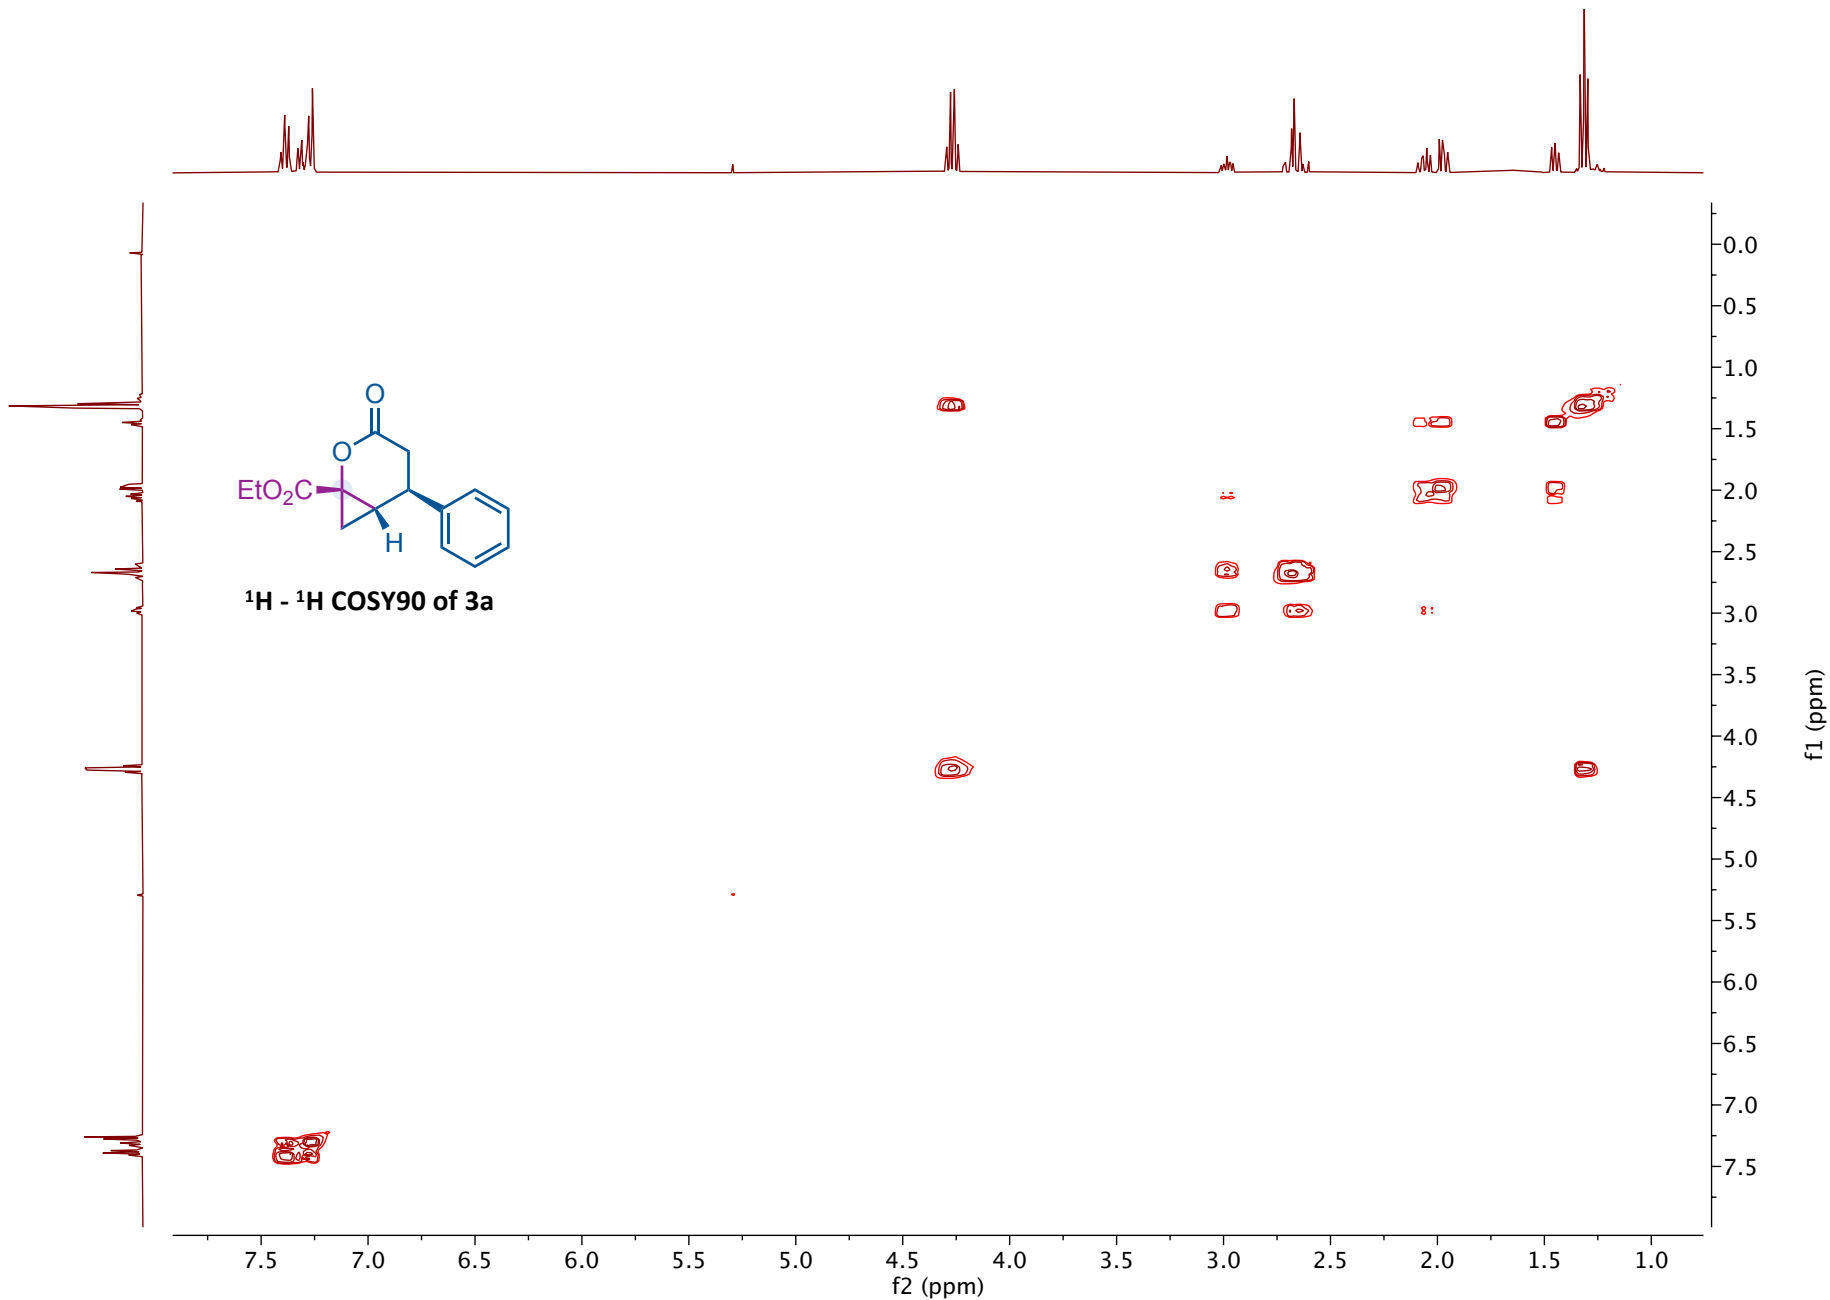

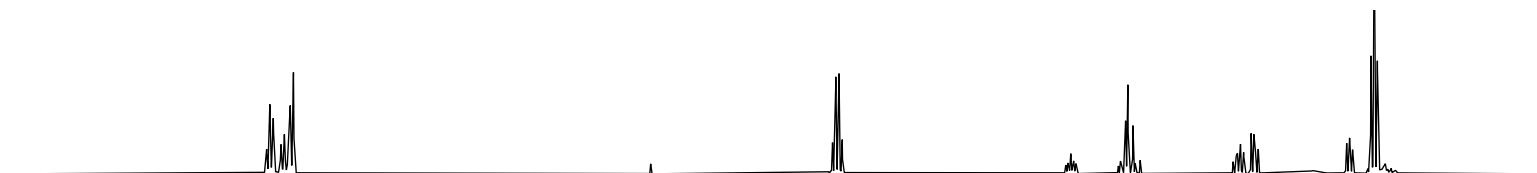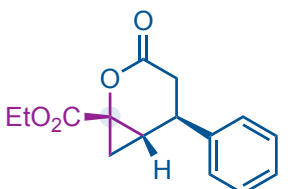

<sup>1</sup>H - <sup>13</sup>C HSQC of 3a

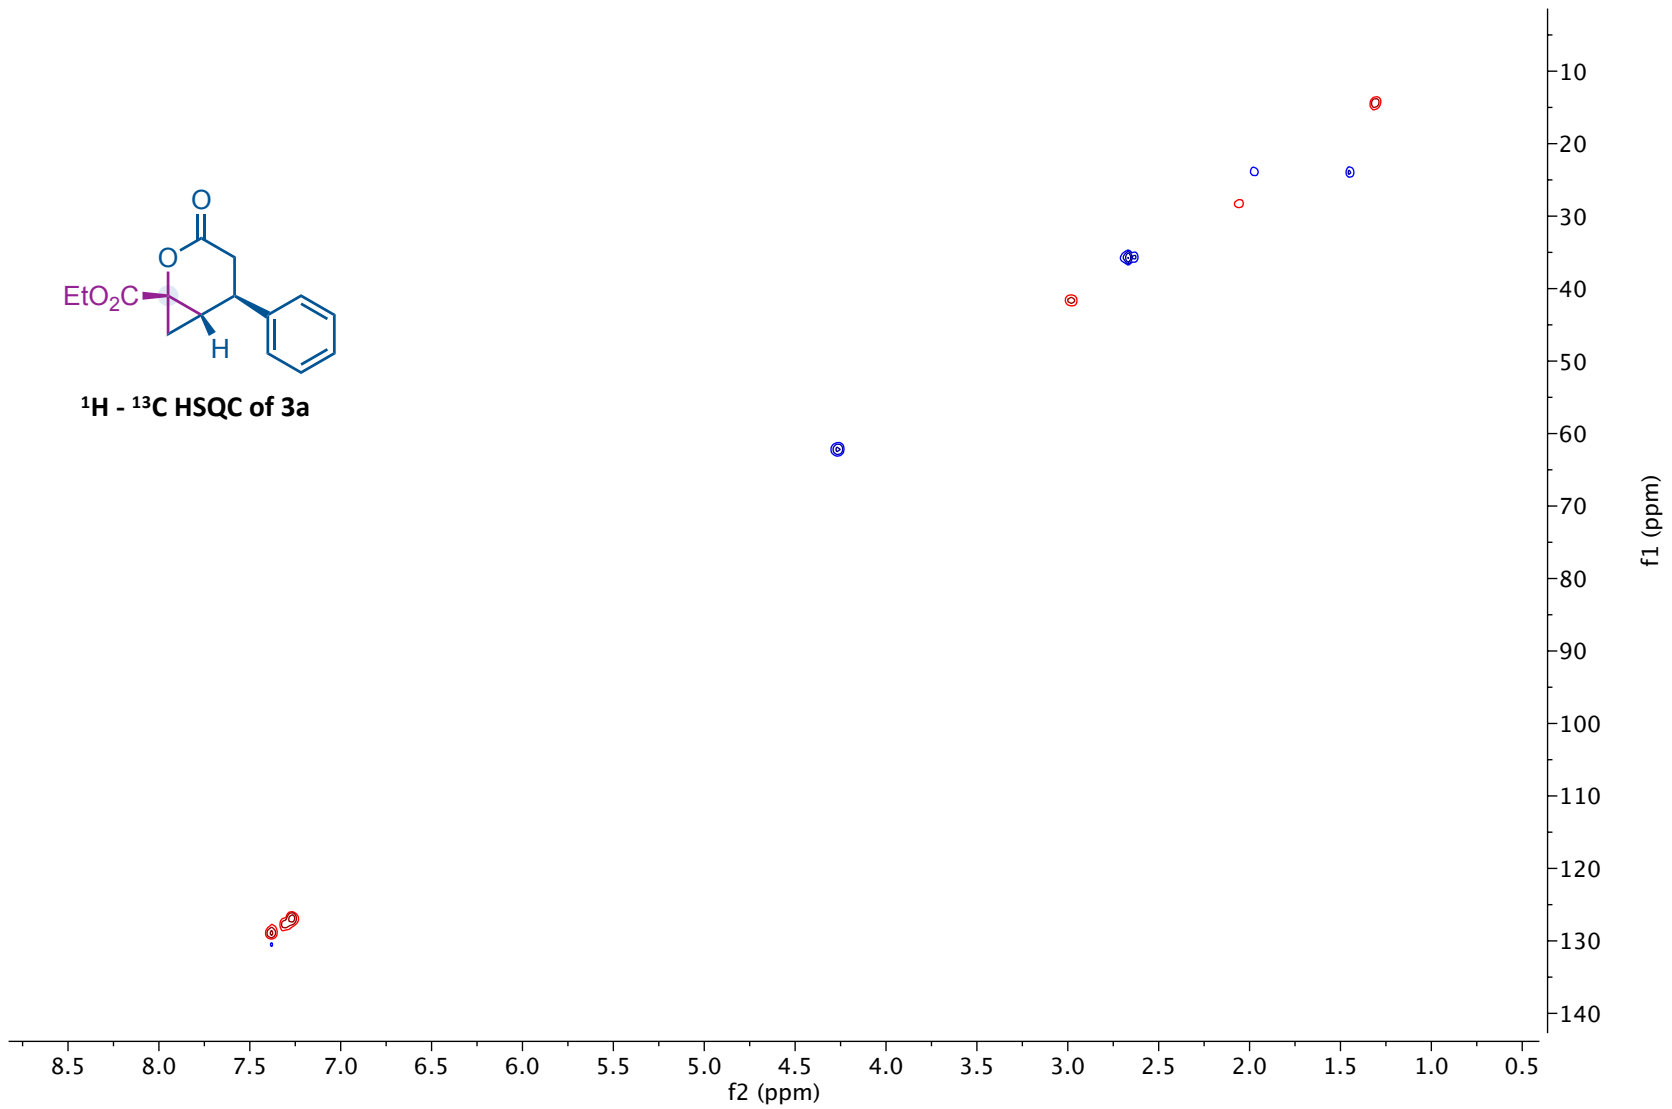

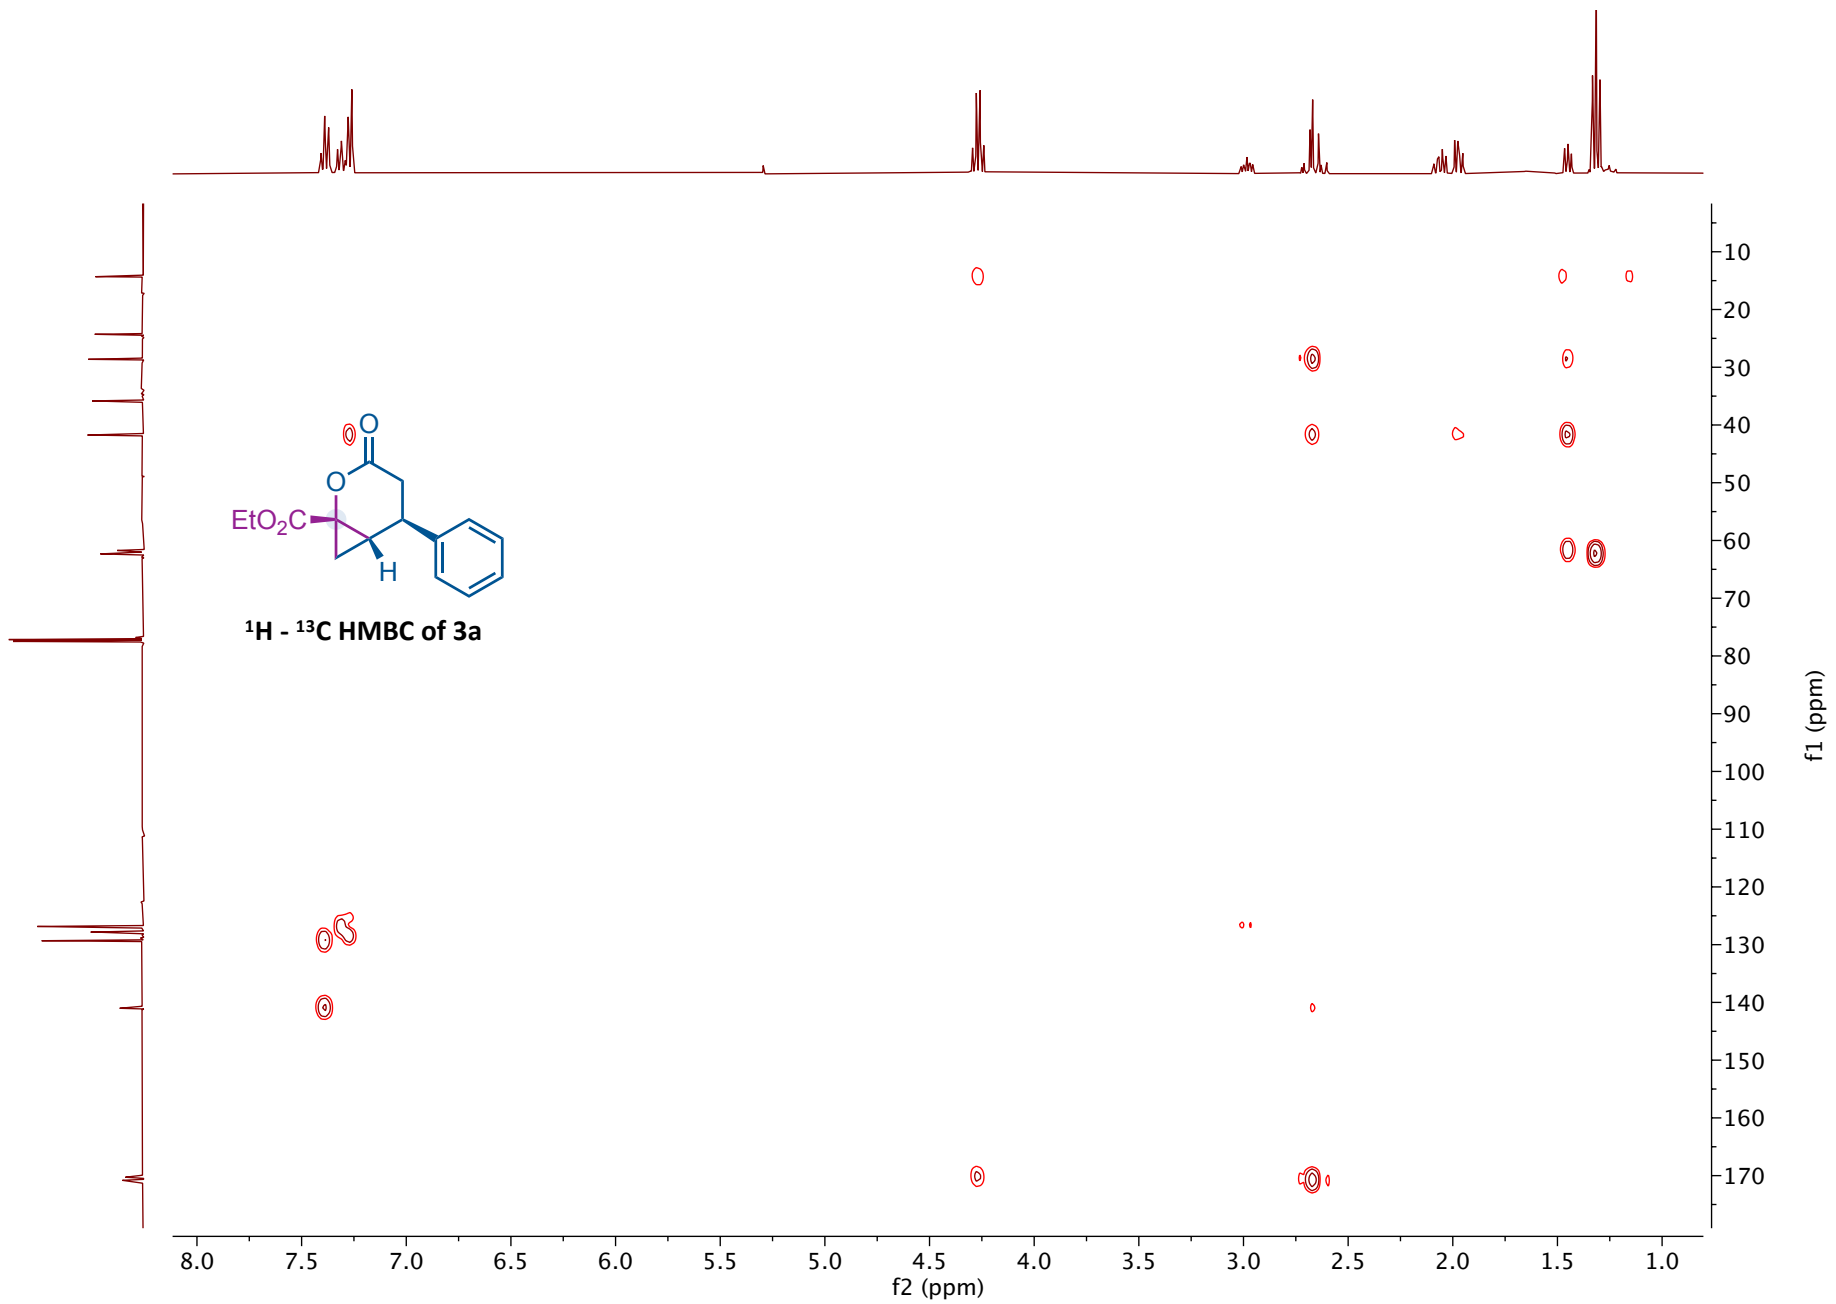

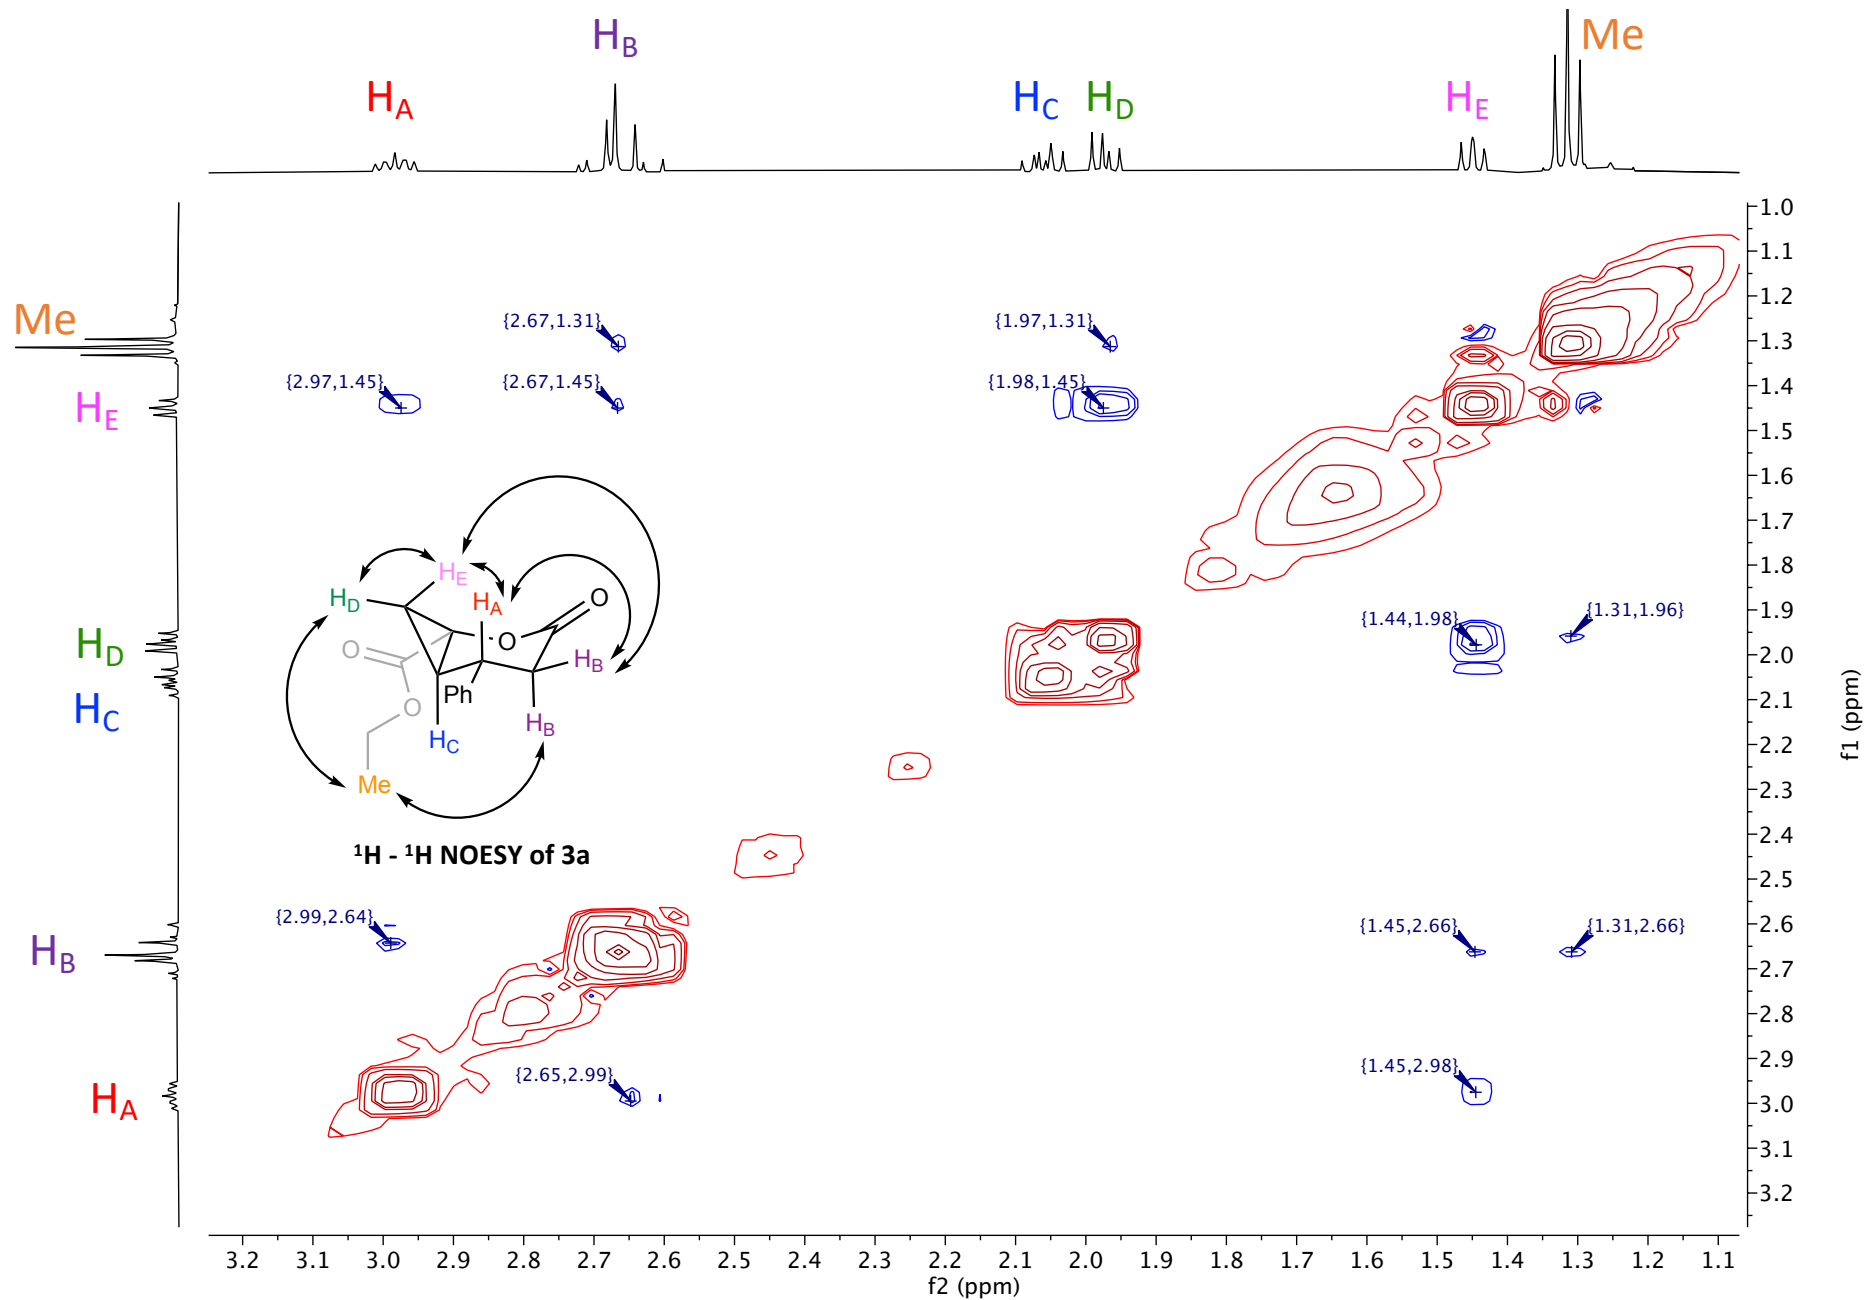

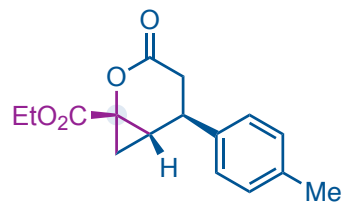

**<sup>1</sup>H NMR of 3b** (400 MHz, CDCl<sub>3</sub>)

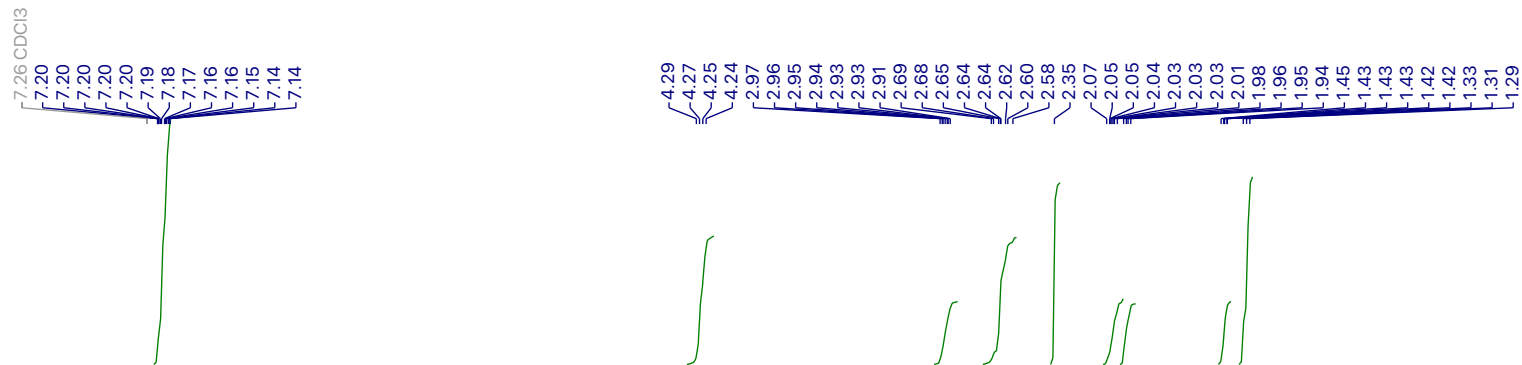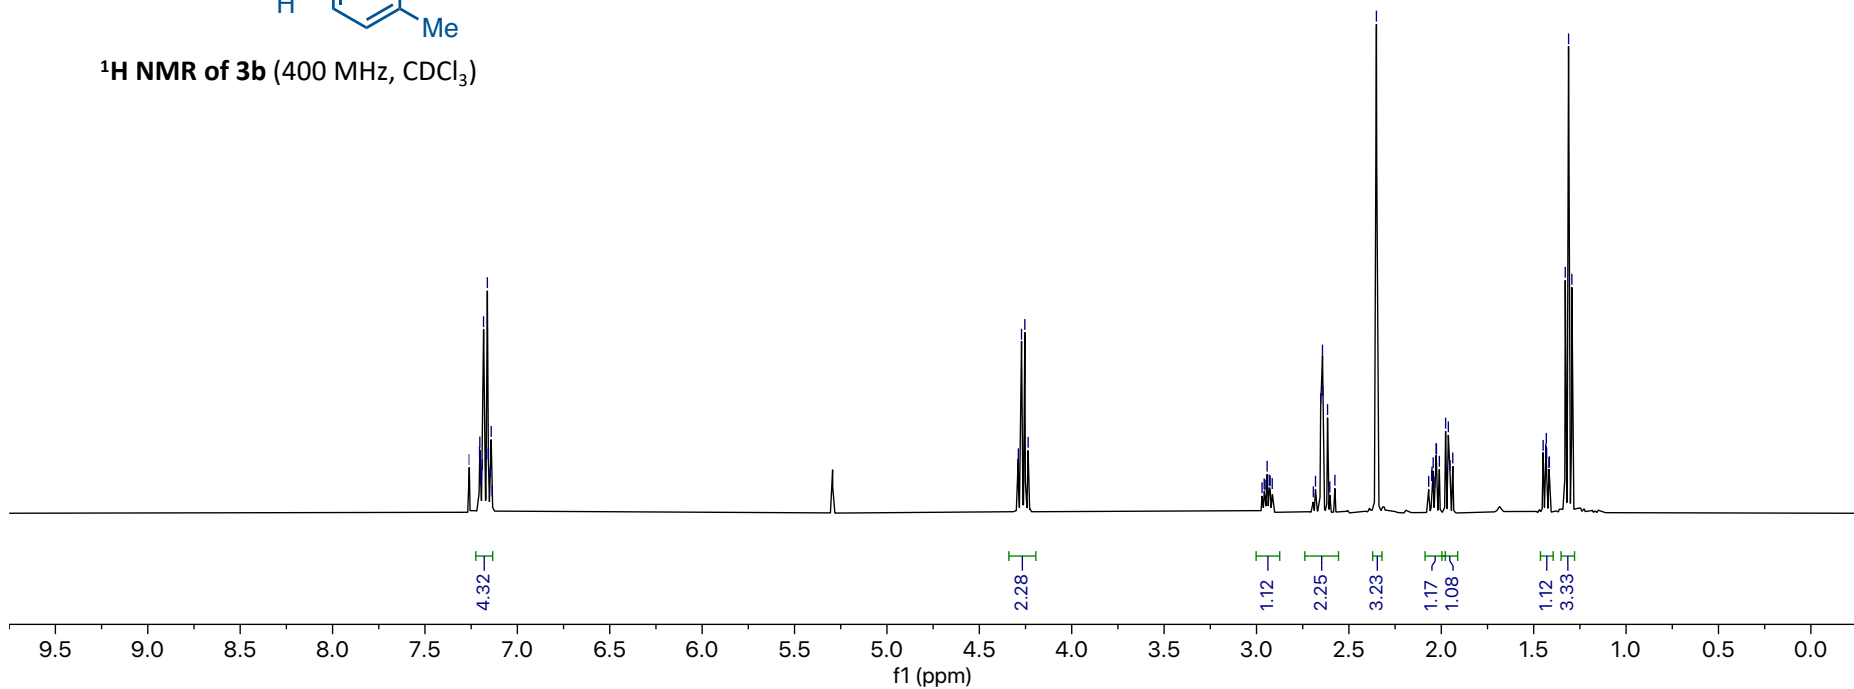





<sup>13</sup>C NMR of 3b (101 MHz, CDCl<sub>3</sub>)

170.91  
170.30

138.06  
137.53

129.92  
126.69

77.16 CDCl<sub>3</sub>

62.26  
61.71

41.38

35.95

28.73

24.27

21.13

14.30

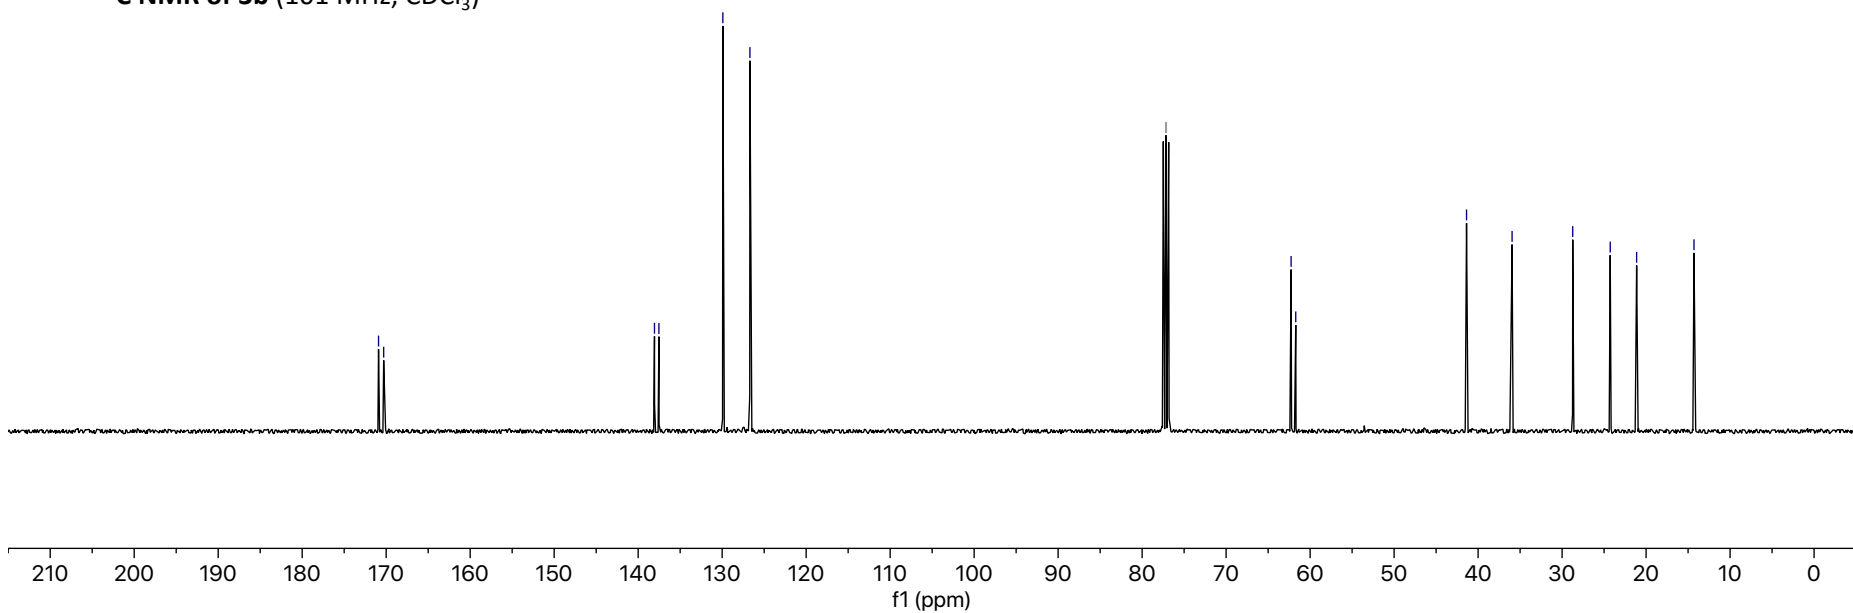

7.26 CDCl3  
7.20  
7.19  
7.19  
7.18  
7.17  
7.16  
6.93  
6.92  
6.90  
6.90  
6.89

4.30  
4.29  
4.27  
4.25  
4.24  
4.23  
4.22  
3.81

2.96  
2.95  
2.94  
2.93  
2.92  
2.91  
2.90  
2.68  
2.67  
2.64  
2.63  
2.60  
2.59  
2.56  
2.05  
2.03  
2.02  
2.01  
1.99  
1.98  
1.96  
1.95  
1.94  
1.44  
1.43  
1.42  
1.41  
1.41  
1.33  
1.31  
1.29

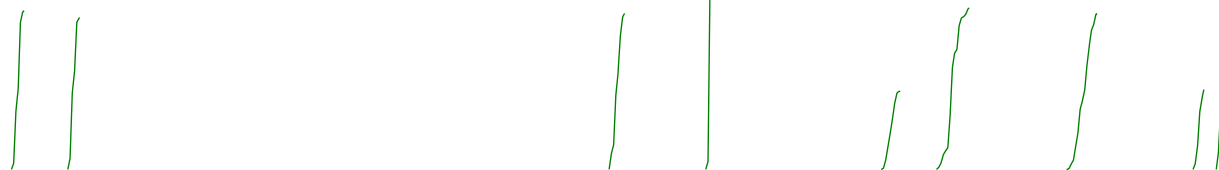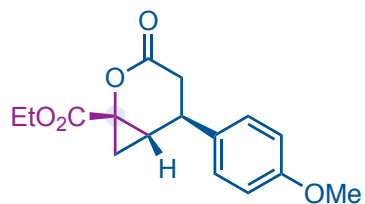

<sup>1</sup>H NMR of 3c (400 MHz, CDCl<sub>3</sub>)

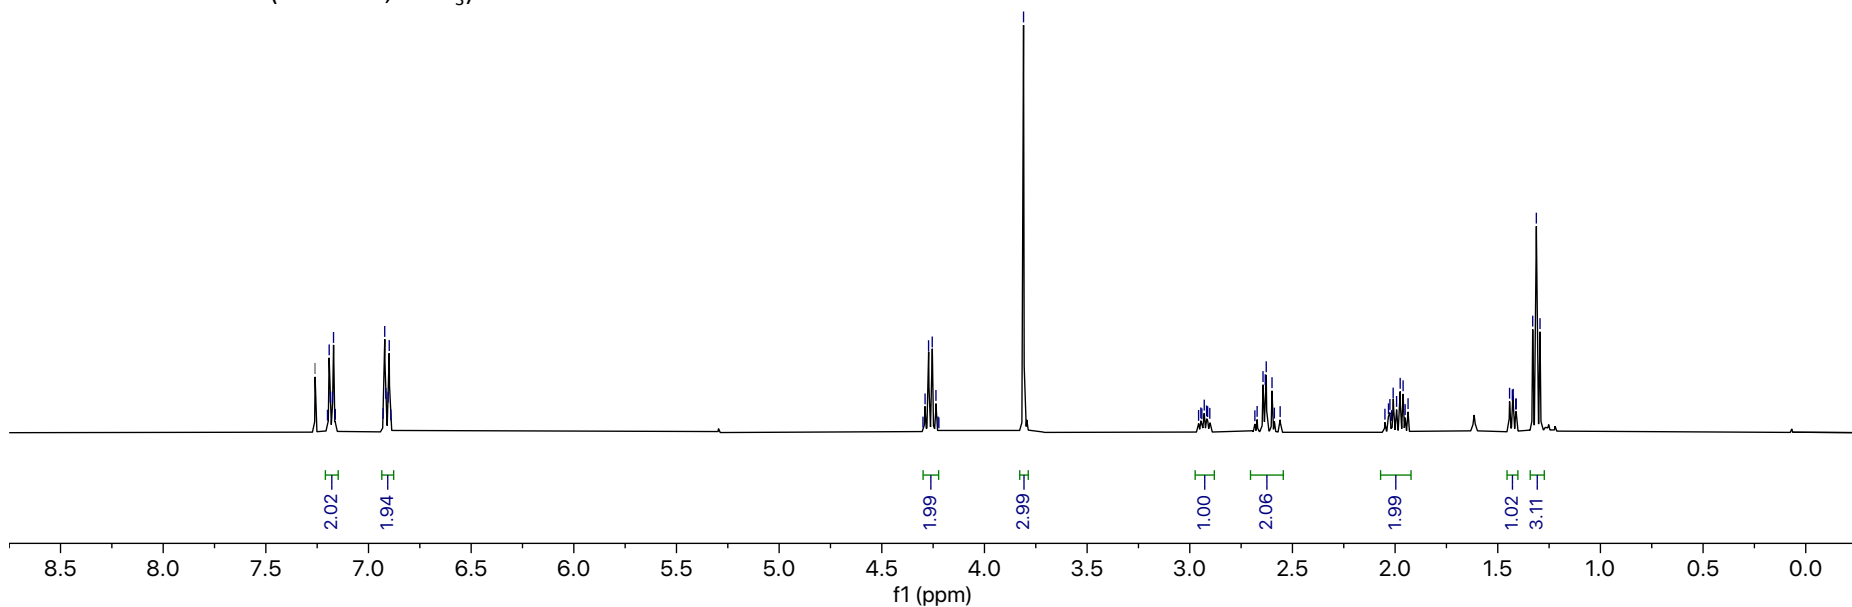

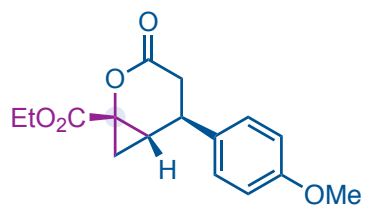

<sup>13</sup>C NMR of 3c (101 MHz, CDCl<sub>3</sub>)

170.92  
170.36

159.16

133.13

127.87

114.65

77.16 CDCl<sub>3</sub>

62.30  
61.72

55.49

41.02

36.11

28.85

24.28

14.32

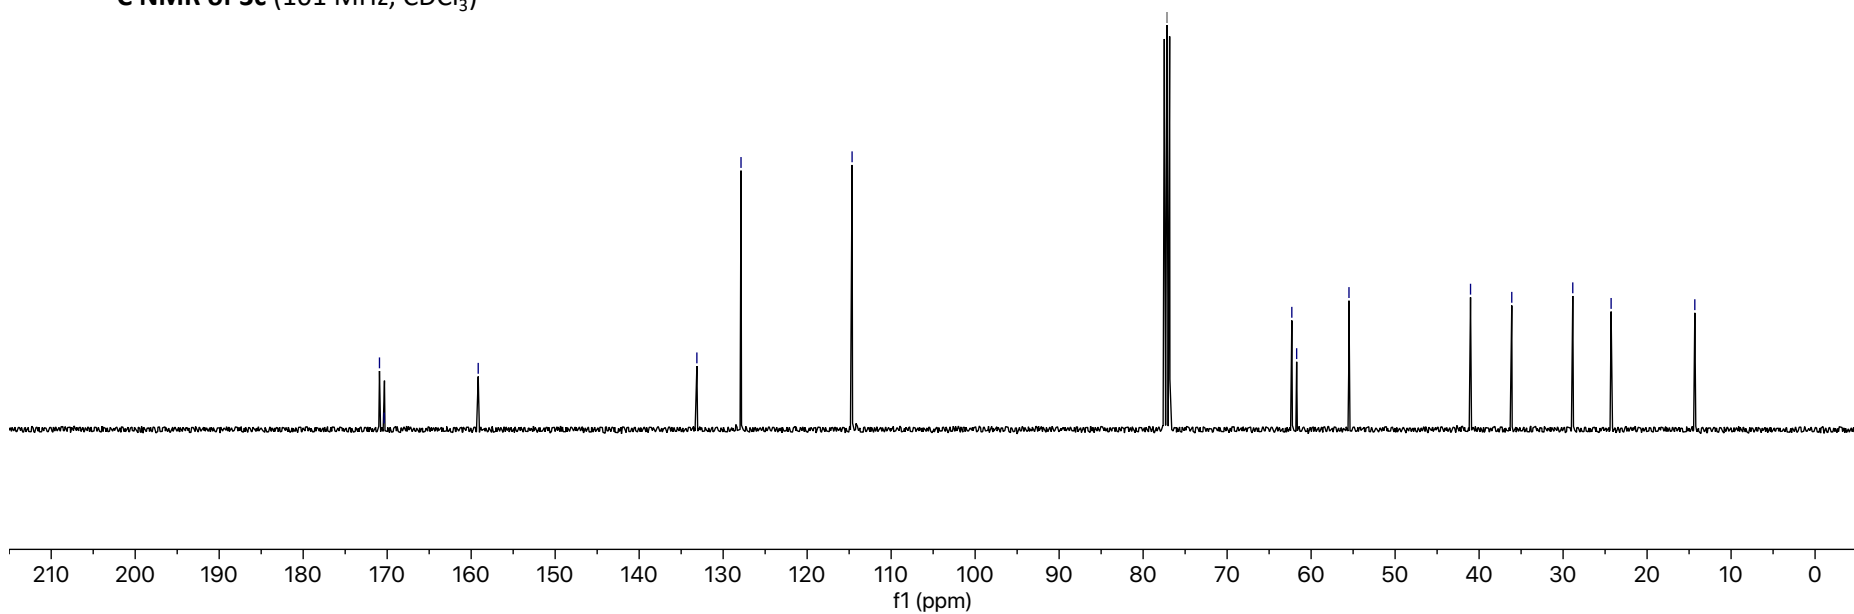

7.26 CDCl<sub>3</sub>  
7.26  
7.25  
7.25  
7.24  
7.24  
7.24  
7.23  
7.23  
7.22  
7.22  
7.21  
7.10  
7.10  
7.09  
7.08  
7.08  
7.07  
7.07  
7.06  
7.05  
7.04

4.29  
4.29  
4.28  
4.28  
4.26  
4.24  
4.24  
3.01  
3.00  
2.99  
2.99  
2.98  
2.97  
2.96  
2.96  
2.95  
2.70  
2.69  
2.66  
2.65  
2.64  
2.61  
2.60  
2.57  
2.04  
2.02  
2.01  
2.00  
1.99  
1.98  
1.98  
1.96  
1.95  
1.46  
1.46  
1.45  
1.45  
1.44  
1.44  
1.44  
1.43  
1.31  
1.30

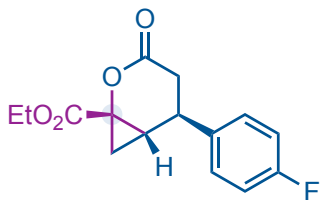

<sup>1</sup>H NMR of 3d (400 MHz, CDCl<sub>3</sub>)

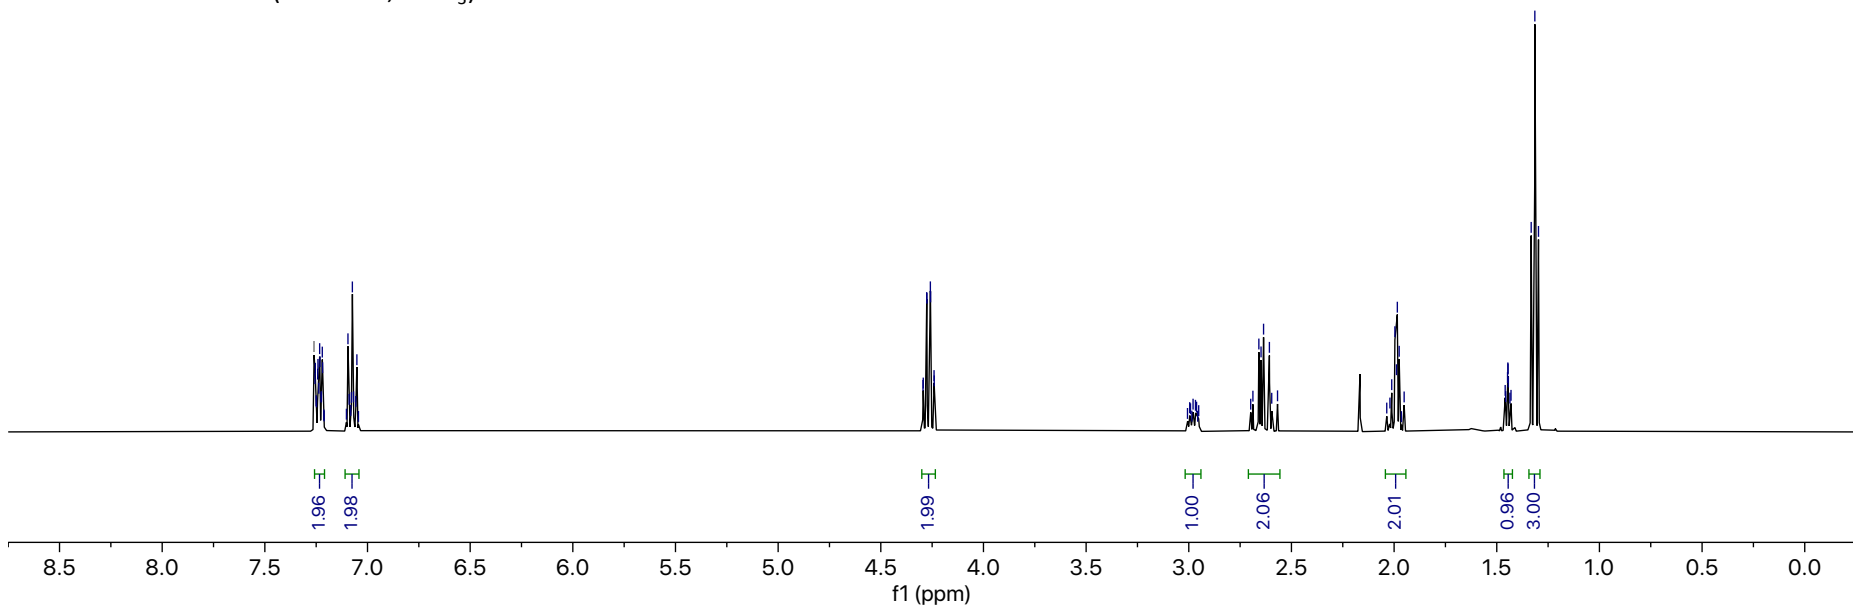

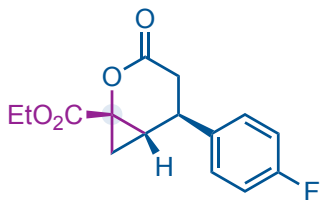

$^{13}\text{C}$  NMR of **3d** (101 MHz,  $\text{CDCl}_3$ )

170.47  
170.17

163.48  
161.03

136.81  
136.78

128.48  
128.40

116.31  
116.10

77.16  $\text{CDCl}_3$

62.40  
61.67

40.99

35.91

28.57

24.20

14.32

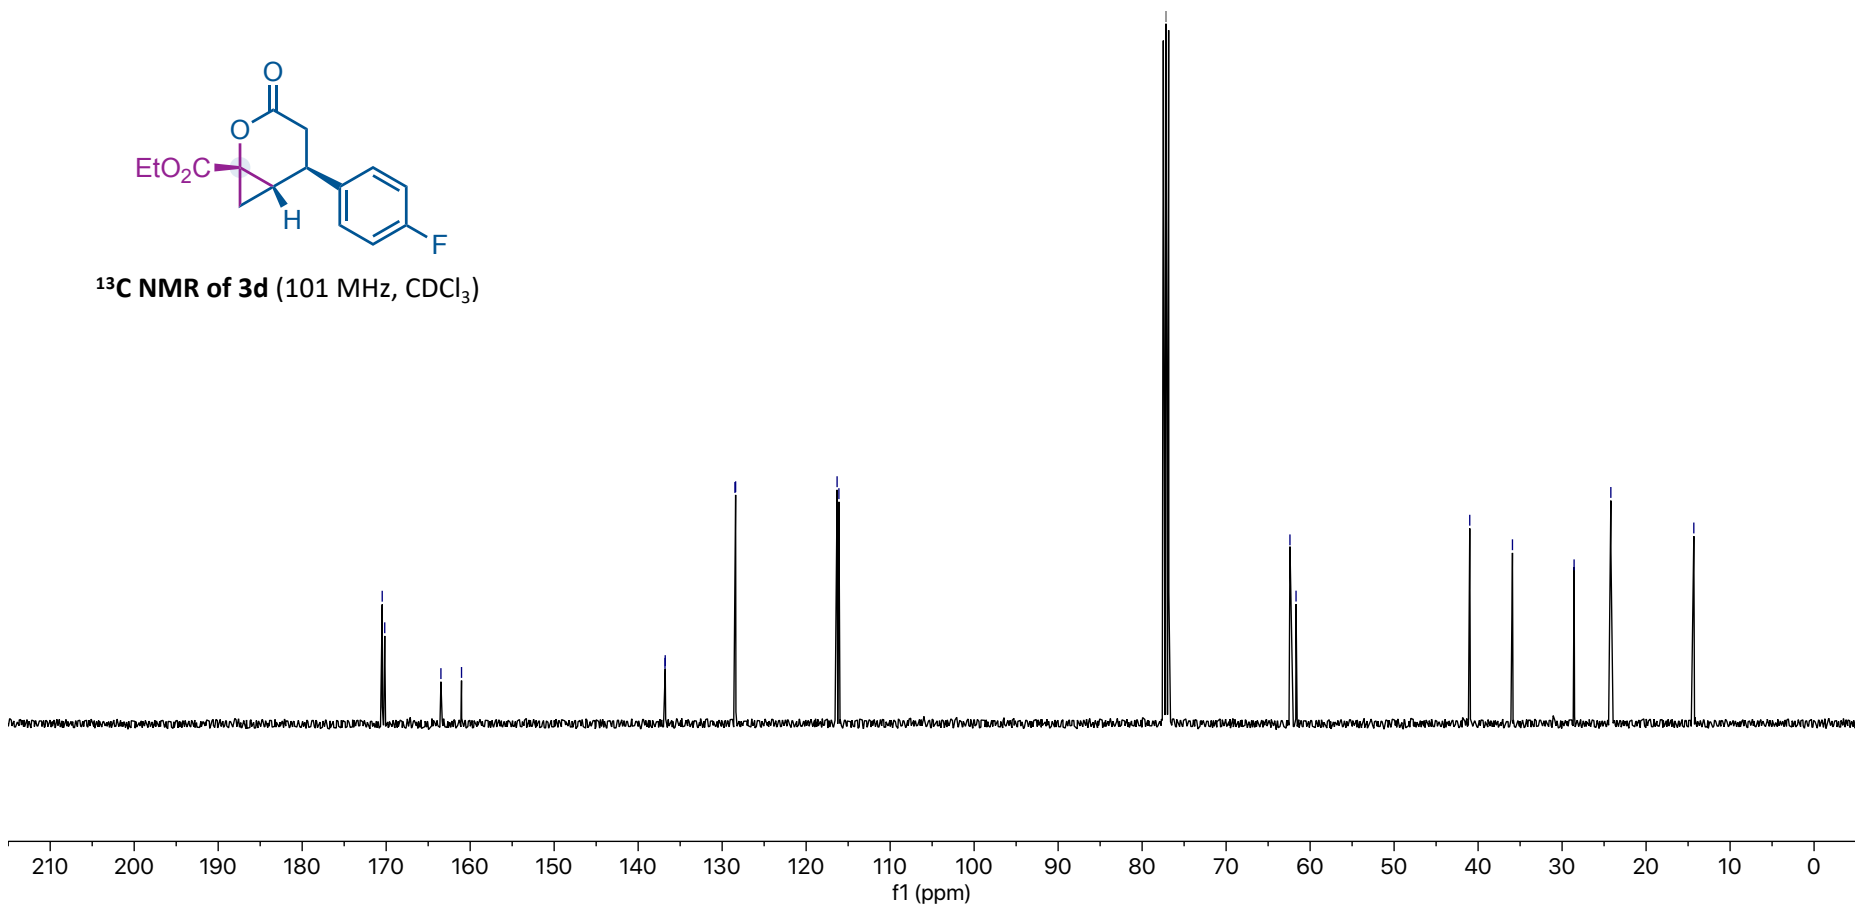

-114.21  
-114.23  
-114.24  
-114.24  
-114.25  
-114.26  
-114.27  
-114.29

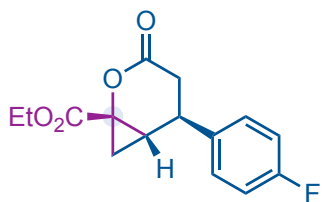

<sup>19</sup>F NMR of 3d (376 MHz, CDCl<sub>3</sub>)

-114.21  
-114.23  
-114.24  
-114.24  
-114.25  
-114.26  
-114.26  
-114.27  
-114.29

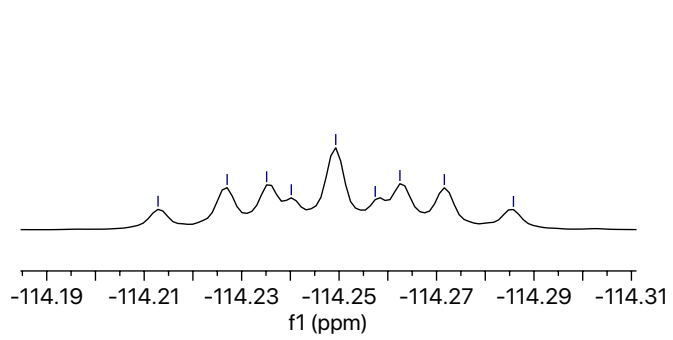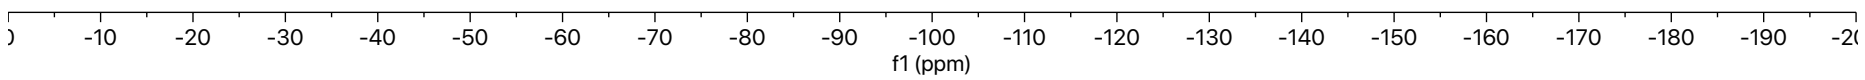

7.36  
7.36  
7.35  
7.35  
7.34  
7.34  
7.33  
7.26 CDCl<sub>3</sub>  
7.22  
7.21  
7.21  
7.20  
7.19  
7.19

4.28  
4.28  
4.27  
4.27  
4.25  
4.25  
4.24  
4.24  
2.99  
2.98  
2.98  
2.97  
2.96  
2.96  
2.95  
2.68  
2.67  
2.65  
2.64  
2.63  
2.60  
2.59  
2.57  
2.02  
2.01  
2.00  
1.99  
1.98  
1.98  
1.97  
1.96  
1.95  
1.46  
1.45  
1.45  
1.44  
1.44  
1.44  
1.44  
1.43  
1.32  
1.31  
1.29

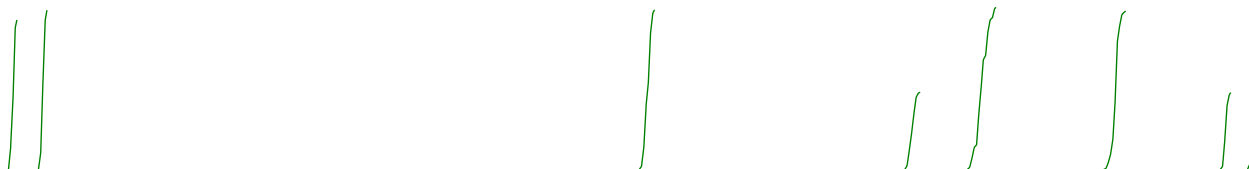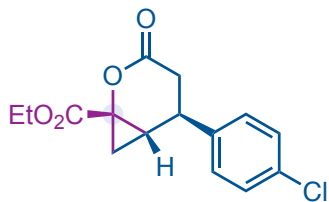

<sup>1</sup>H NMR of 3e (400 MHz, CDCl<sub>3</sub>)

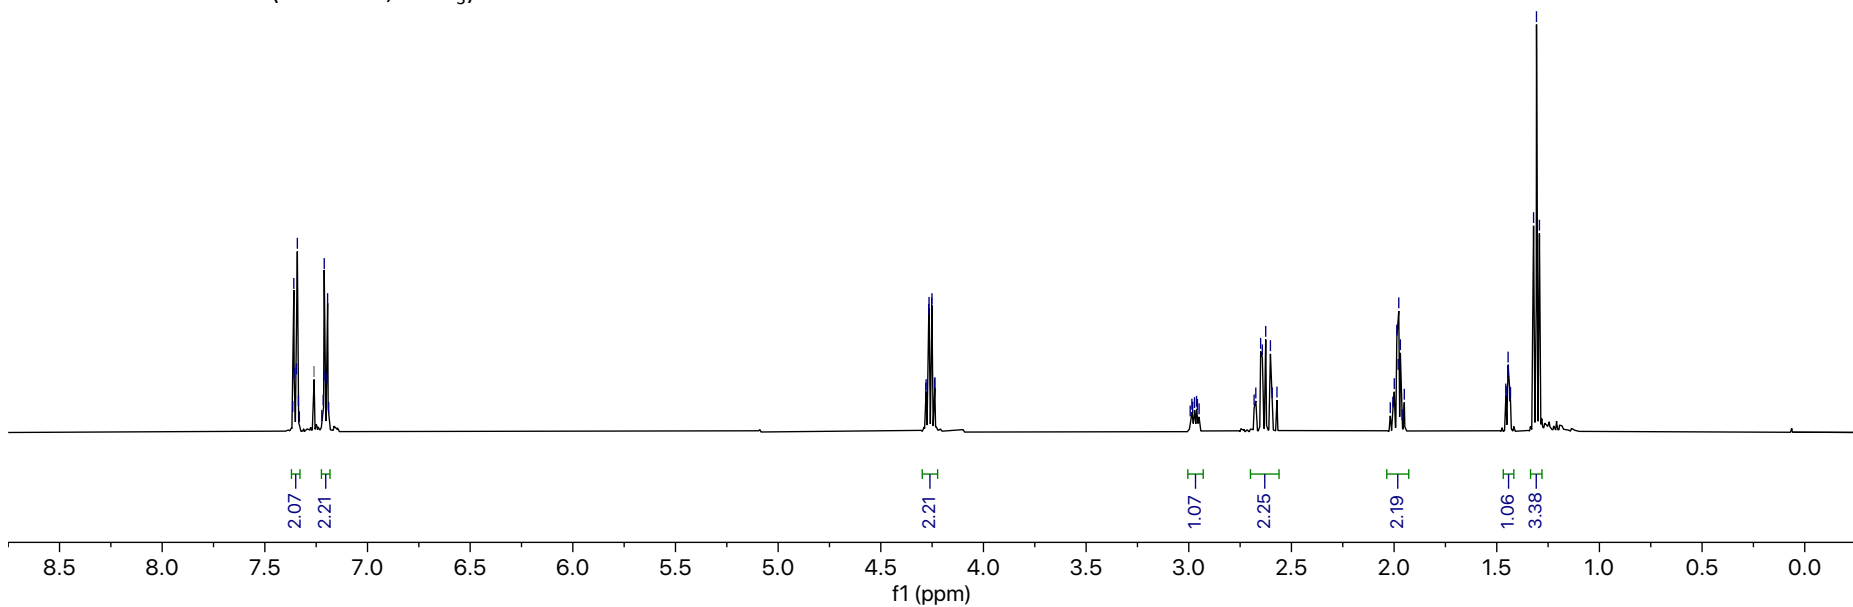

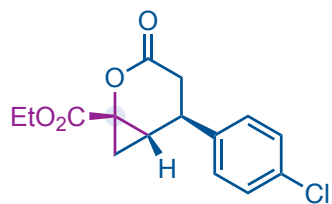

<sup>13</sup>C NMR of 3e (101 MHz, CDCl<sub>3</sub>)

170.34  
170.12

139.46

133.73

129.48

128.23

77.16 CDCl<sub>3</sub>

62.44

61.66

41.09

35.69

28.35

24.17

14.31

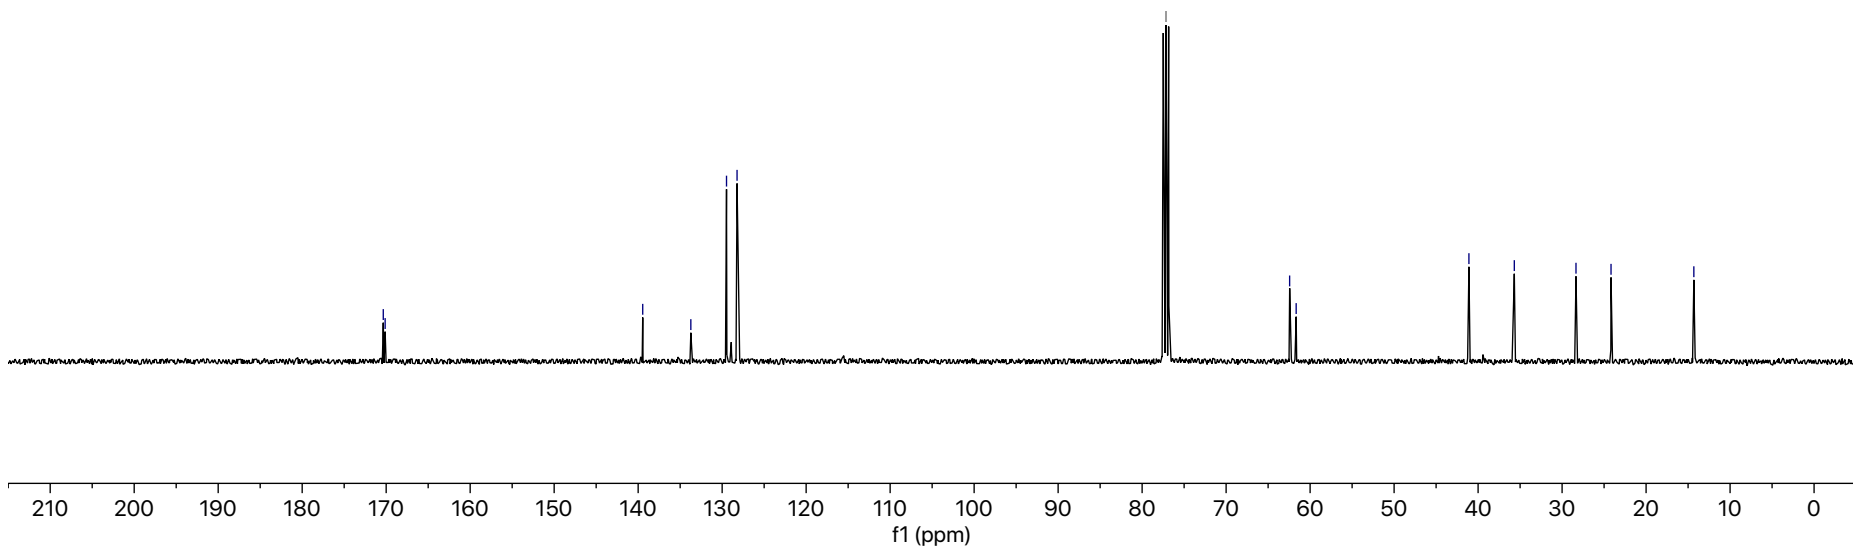



7.67  
7.66  
7.66  
7.66  
7.65  
7.65  
7.64  
7.63  
7.63  
7.42  
7.41  
7.41  
7.41  
7.40  
7.39  
7.39  
7.39  
7.39  
7.26 CDCl<sub>3</sub>

4.30  
4.29  
4.28  
4.28  
4.26  
4.24  
4.24  
3.10  
3.09  
3.07  
3.06  
3.06  
3.05  
2.74  
2.72  
2.70  
2.69  
2.68  
2.65  
2.64  
2.61  
2.06  
2.04  
2.04  
2.03  
2.02  
2.01  
2.01  
1.99  
1.98  
1.97  
1.49  
1.48  
1.48  
1.48  
1.47  
1.47  
1.33  
1.31  
1.30

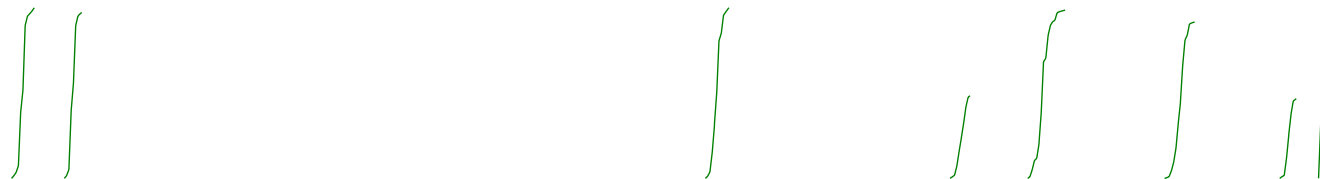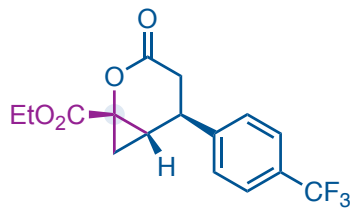

**<sup>1</sup>H NMR of 3f** (400 MHz, CDCl<sub>3</sub>)

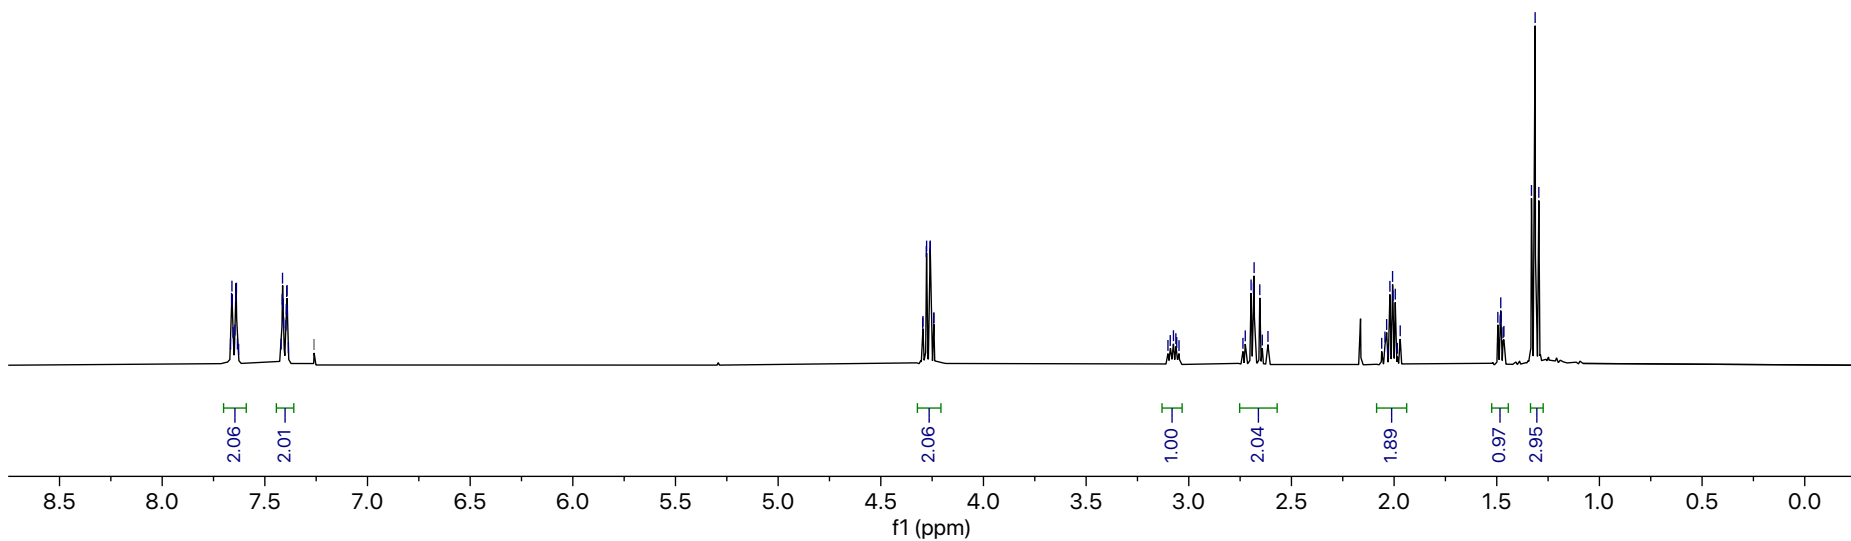

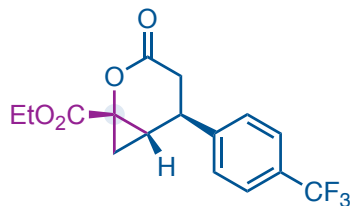

<sup>13</sup>C NMR of 3f (101 MHz, CDCl<sub>3</sub>)

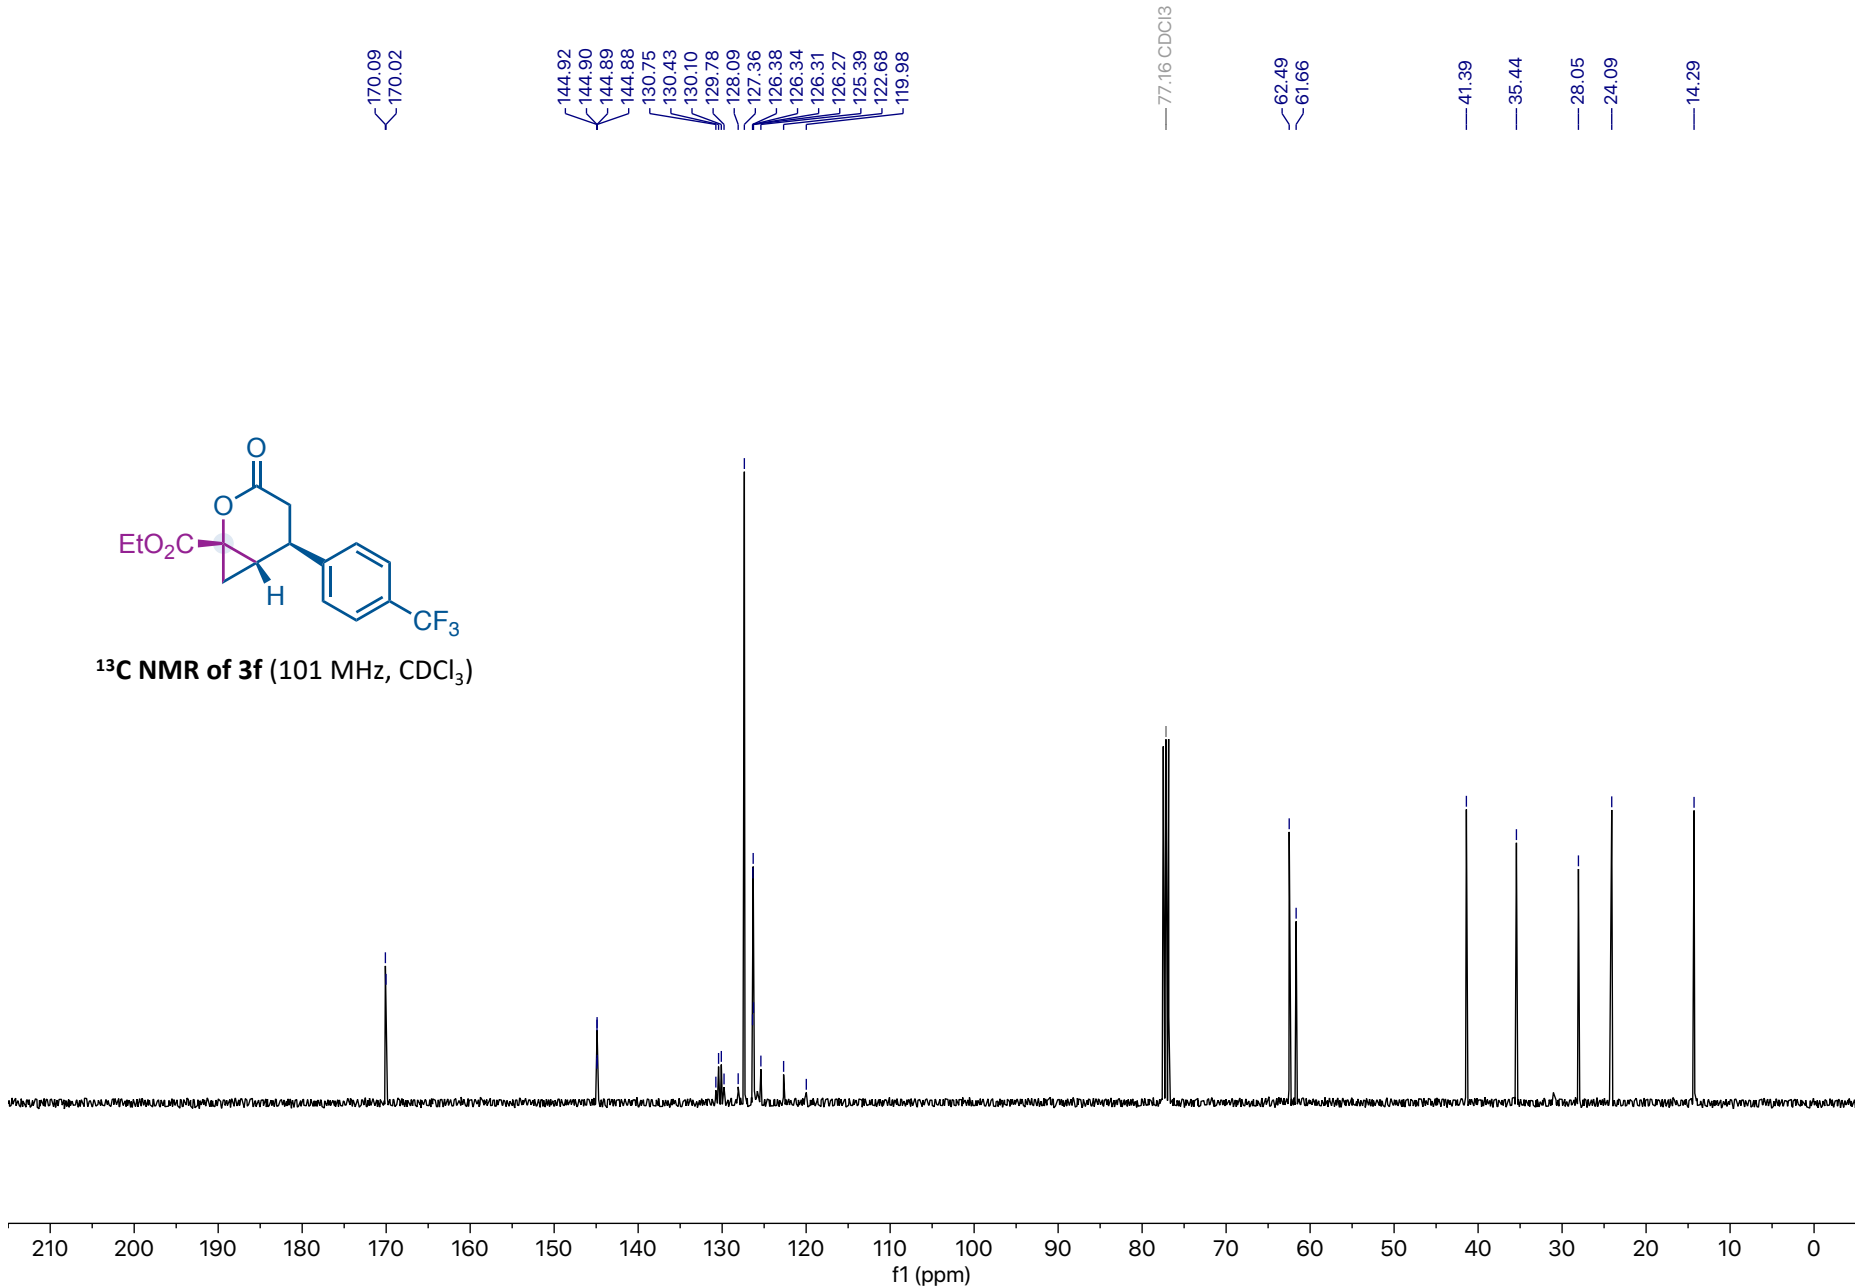

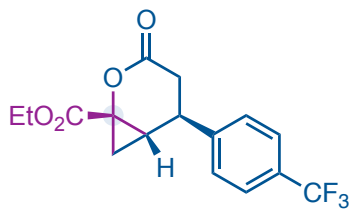

**<sup>19</sup>F NMR of 3f** (376 MHz, CDCl<sub>3</sub>)

— -62.75

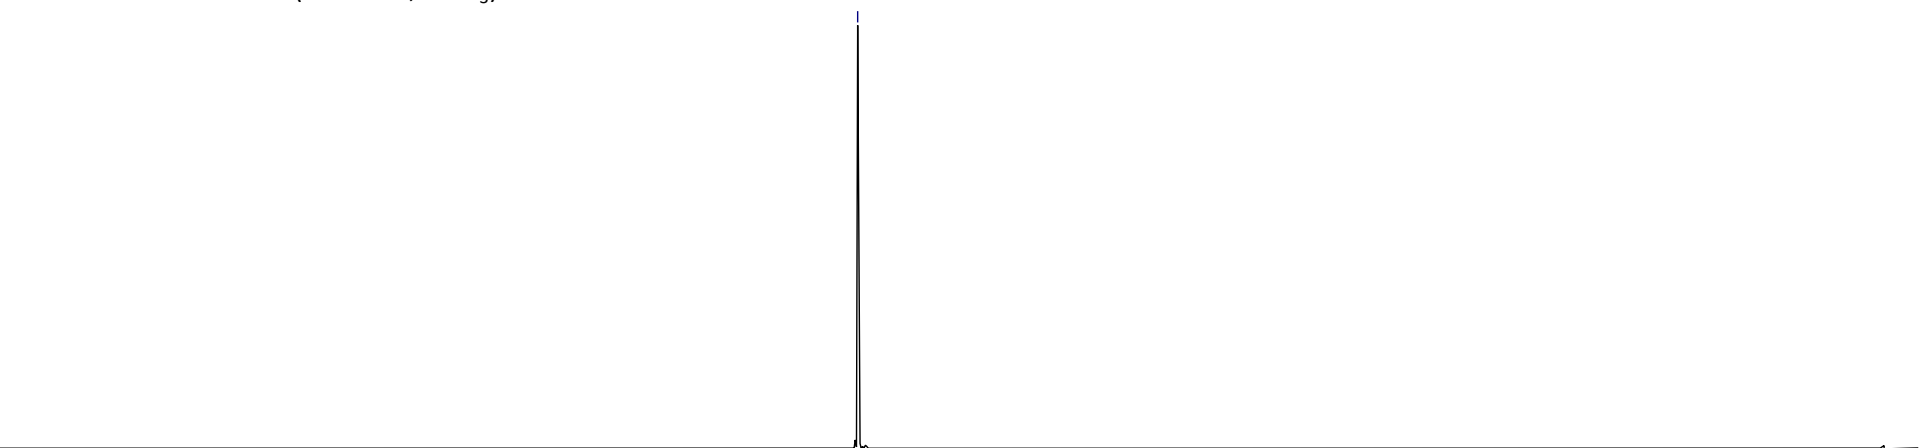

-5 -10 -15 -20 -25 -30 -35 -40 -45 -50 -55 -60 -65 -70 -75 -80 -85 -90 -95 -100 -105 -110 -115 -120 -125 -130 -135 -140

f1 (ppm)

S177

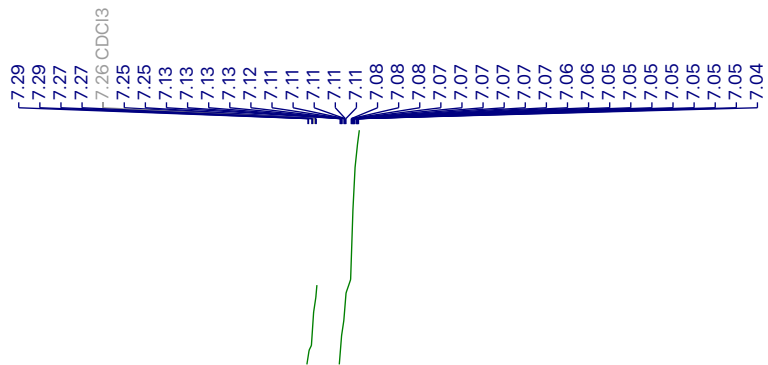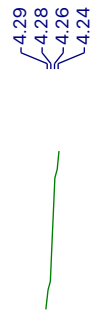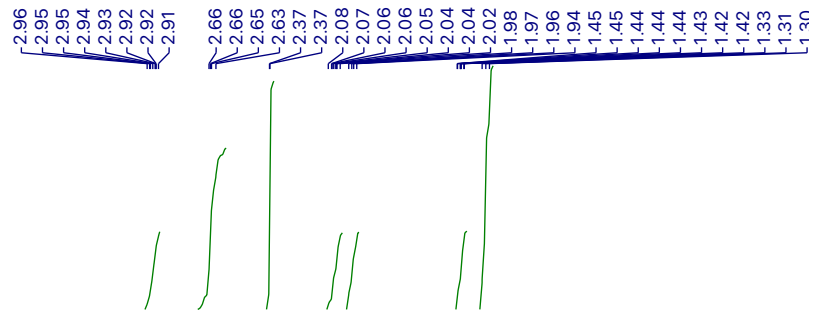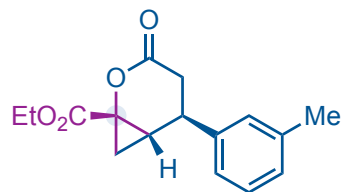

<sup>1</sup>H NMR of **3g** (400 MHz, CDCl<sub>3</sub>)

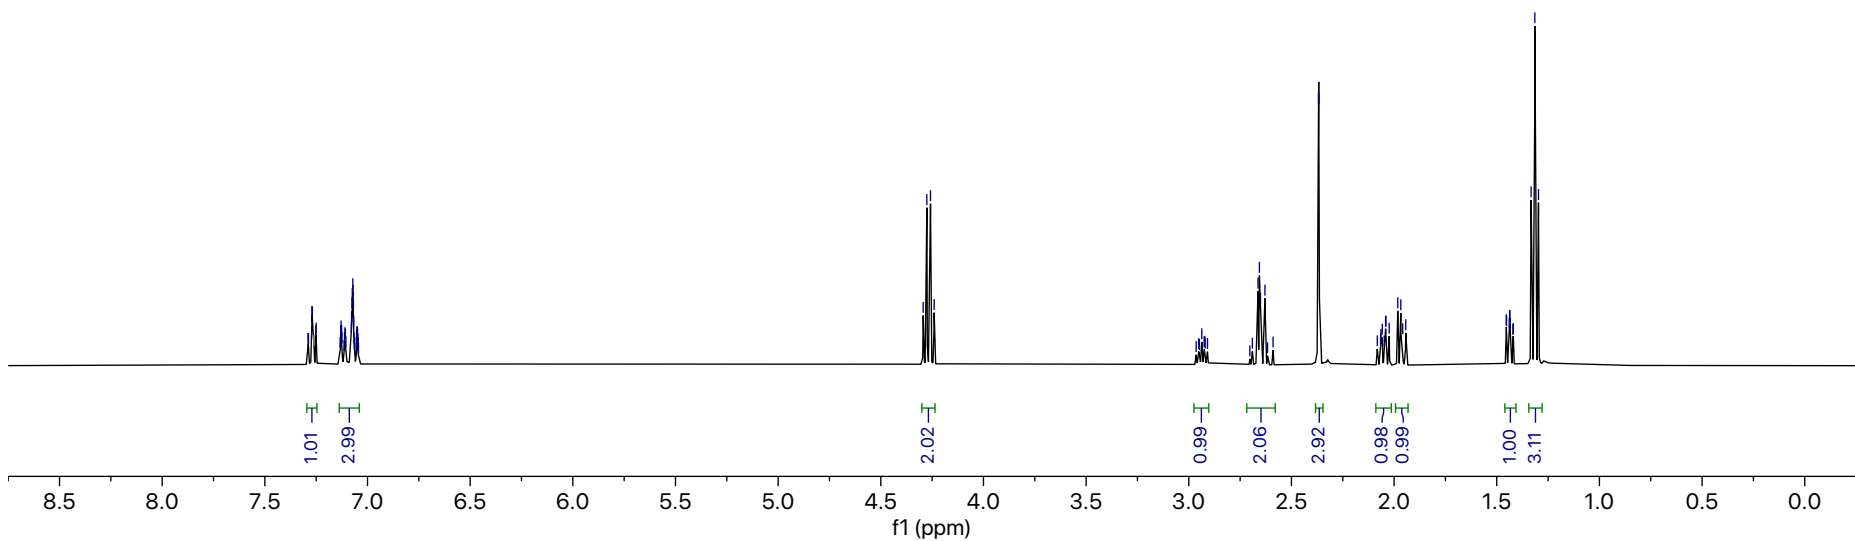

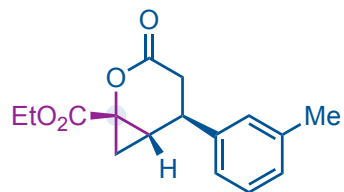

<sup>13</sup>C NMR of 3g (101 MHz, CDCl<sub>3</sub>)

170.91  
170.31

140.95  
139.02

129.16  
128.51  
127.60  
123.82

77.16 CDCl<sub>3</sub>

62.28  
61.71

41.69

35.85

28.68  
24.31  
21.56

14.30

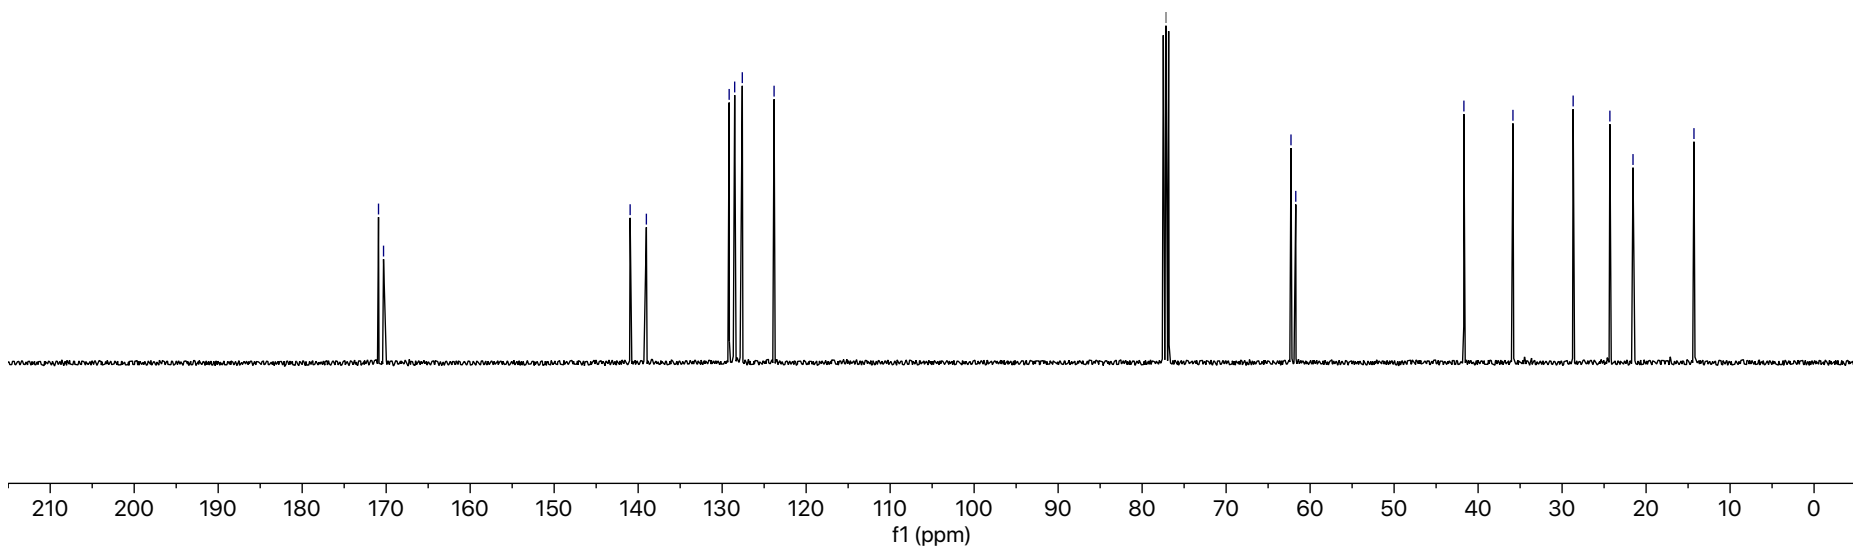

7.28  
7.27  
7.26 CDCl3  
7.26  
7.24  
7.24  
7.22  
7.22  
7.21  
7.20  
7.20  
7.19  
7.18  
7.18  
7.16  
7.16

4.28  
4.26  
4.24  
4.23

3.15  
3.14  
3.13  
3.12  
3.12  
3.11  
3.10  
3.09  
2.78  
2.75  
2.75  
2.71  
2.66  
2.65  
2.62  
2.61  
2.39  
2.02  
2.01  
2.00  
1.98  
1.91  
1.89  
1.89  
1.87  
1.85  
1.48  
1.48  
1.47  
1.47  
1.46  
1.45  
1.45  
1.32  
1.30  
1.29

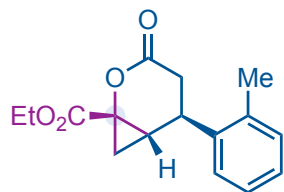

<sup>1</sup>H NMR of 3h (400 MHz, CDCl<sub>3</sub>)

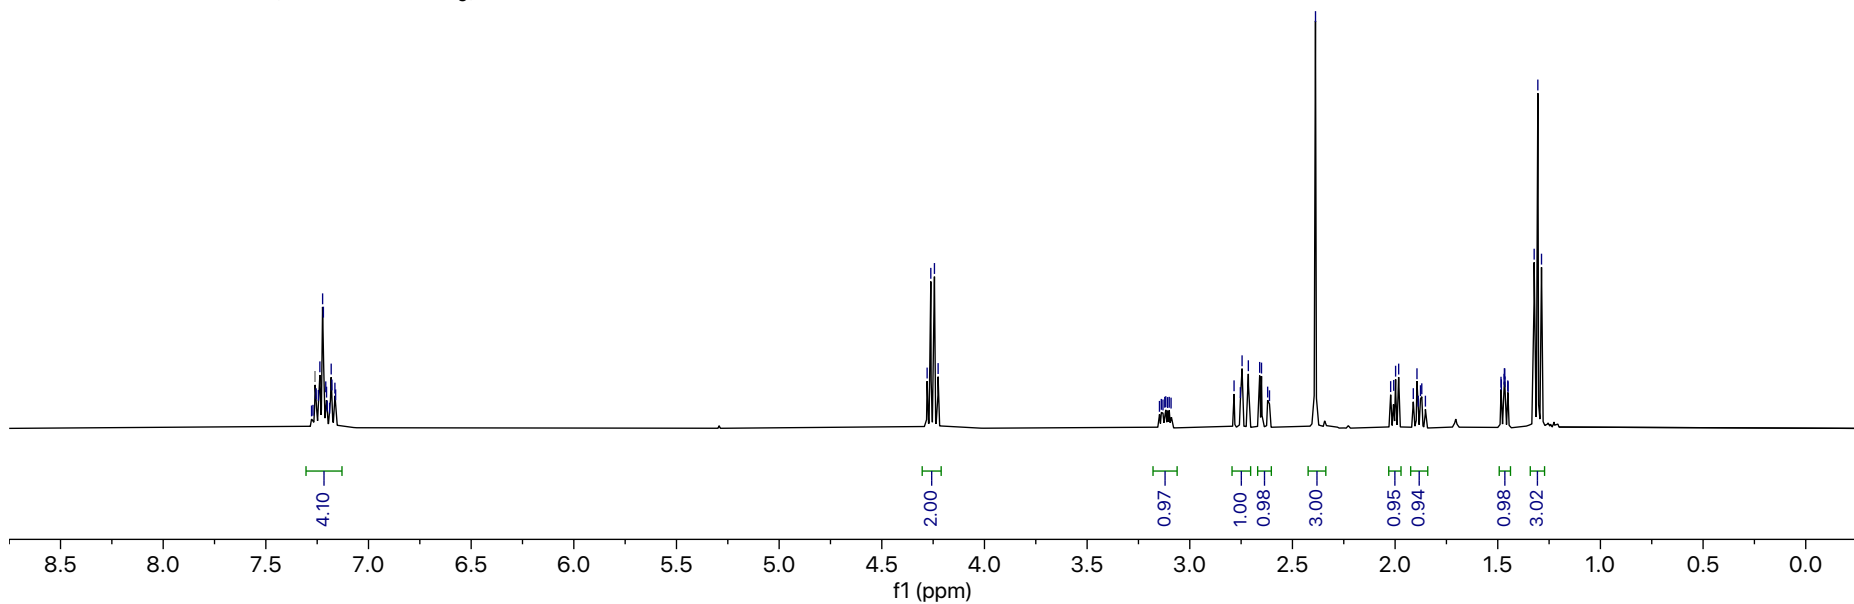

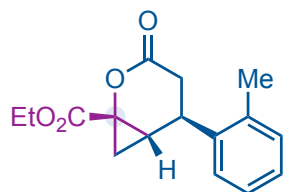

<sup>13</sup>C NMR of 3h (101 MHz, CDCl<sub>3</sub>)

171.42  
170.20

139.22  
135.95  
131.02  
127.54  
126.94  
124.93

77.16 CDCl<sub>3</sub>

62.27  
61.74

37.94  
34.74

28.65  
24.97  
19.96

14.28

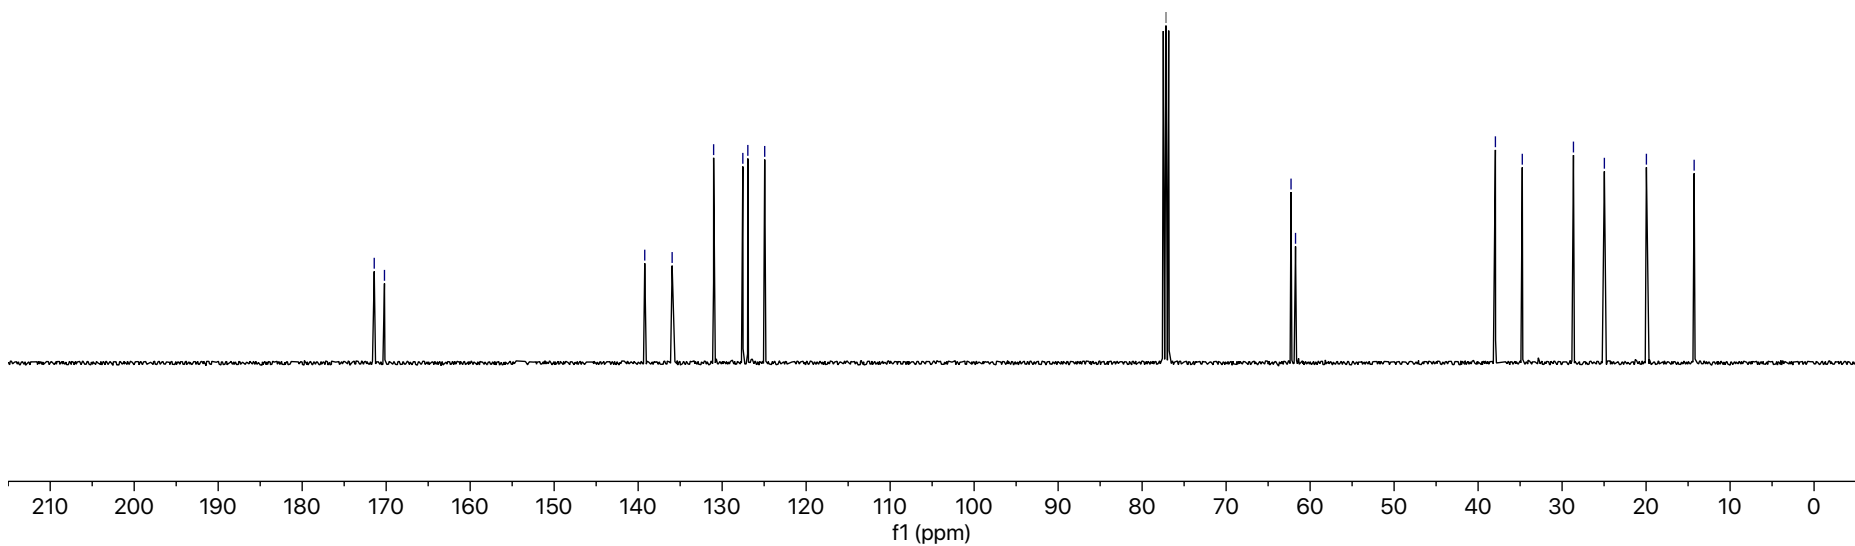

—7.26 CDCl<sub>3</sub>

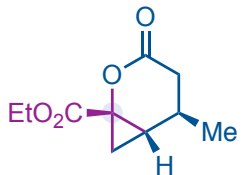

<sup>1</sup>H NMR of 3i (400 MHz, CDCl<sub>3</sub>)

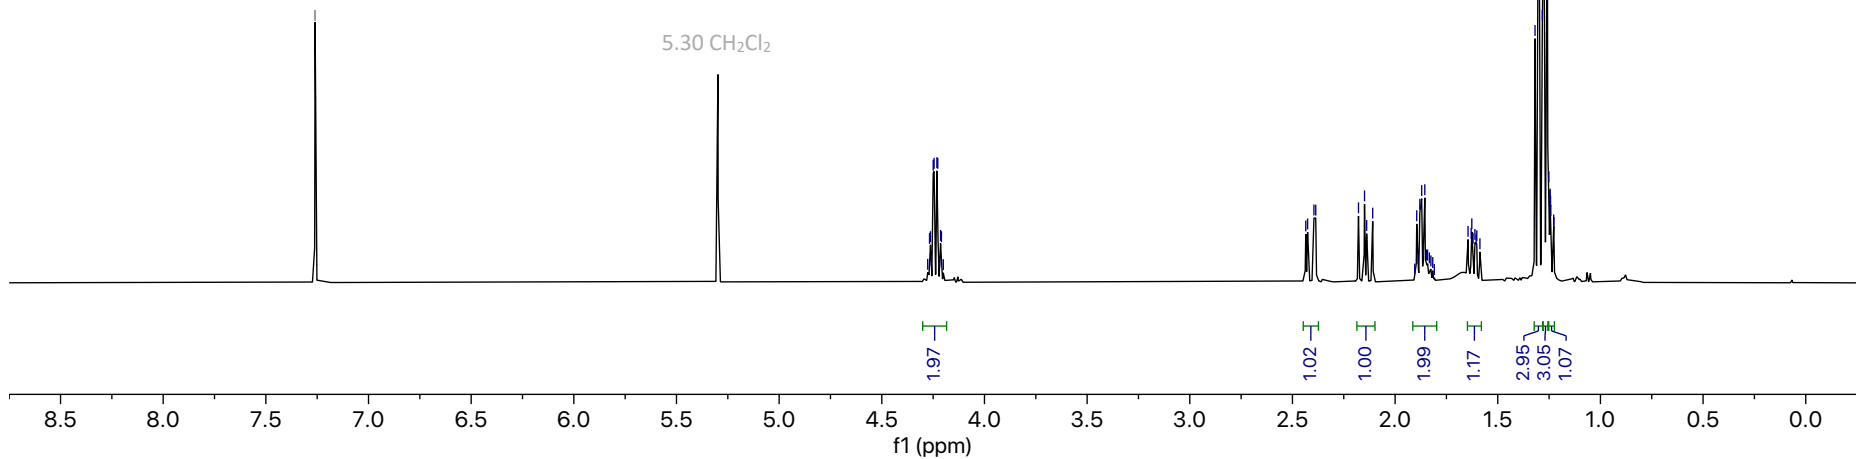



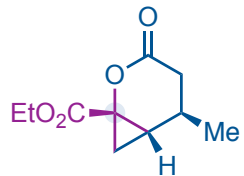

<sup>1</sup>H NMR of 3i (500 MHz, CD<sub>3</sub>OD)

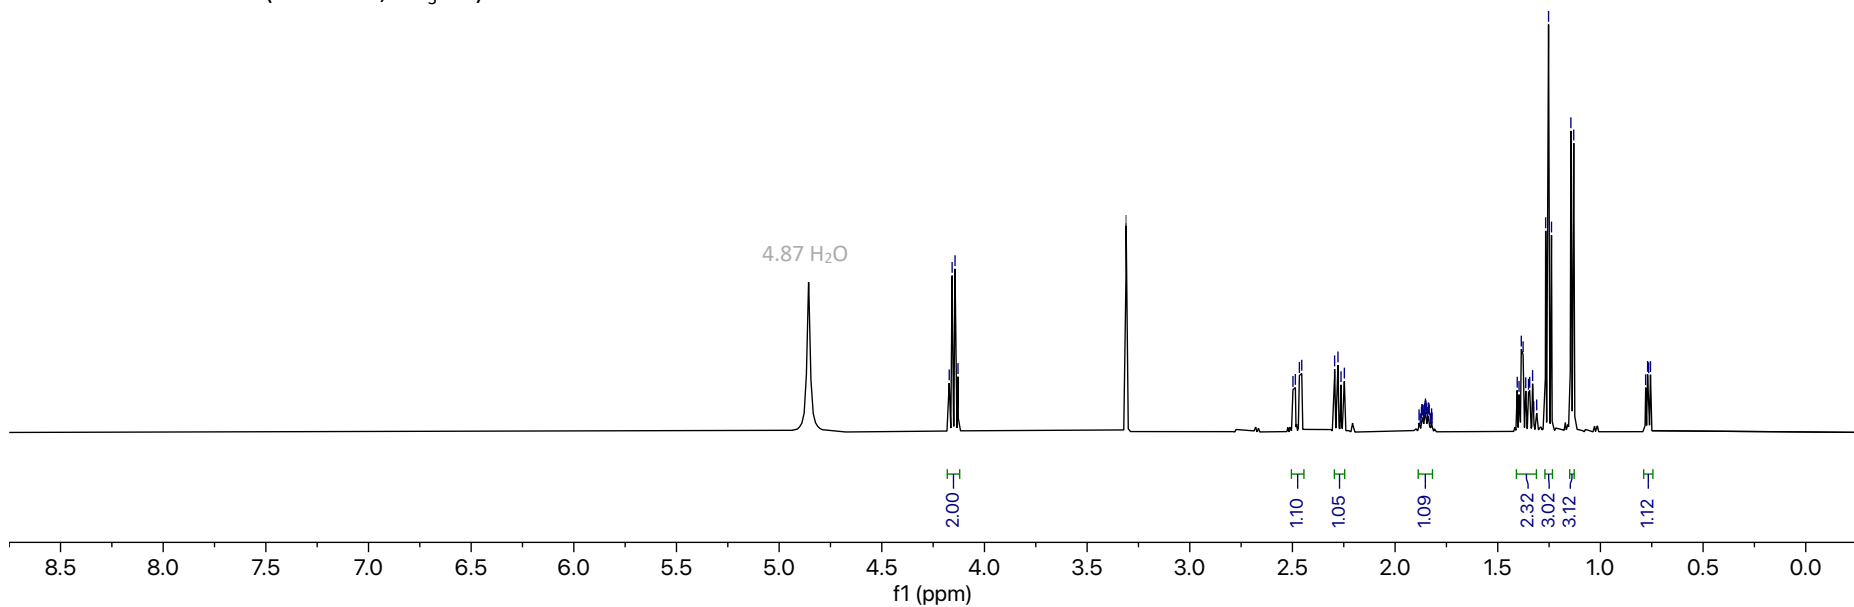

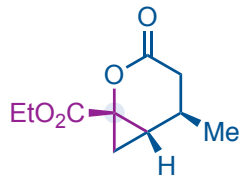

$^{13}\text{C}$  NMR of 3i (101 MHz,  $\text{CDCl}_3$ )

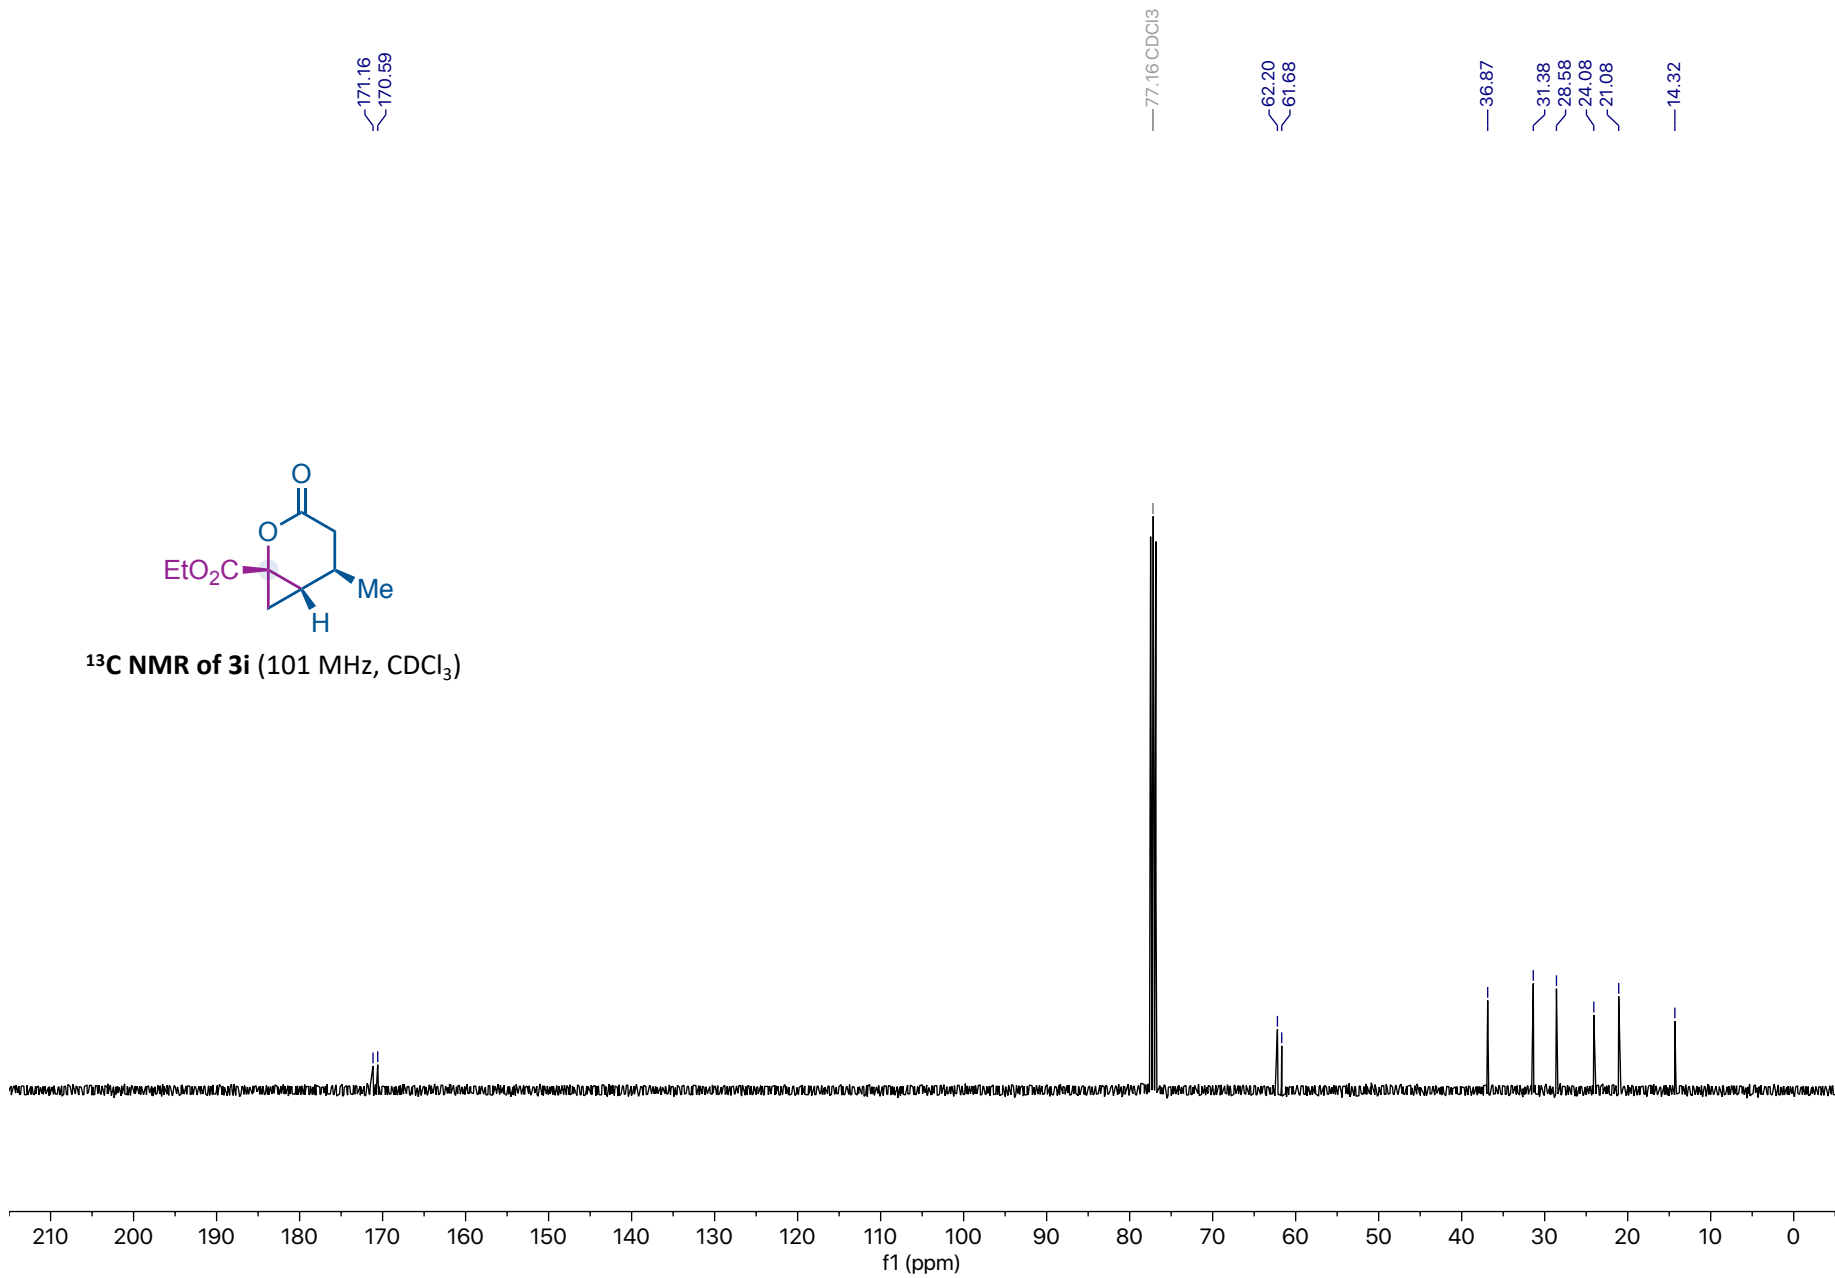



<sup>13</sup>C NMR of 3i (126 MHz, CD<sub>3</sub>OD)

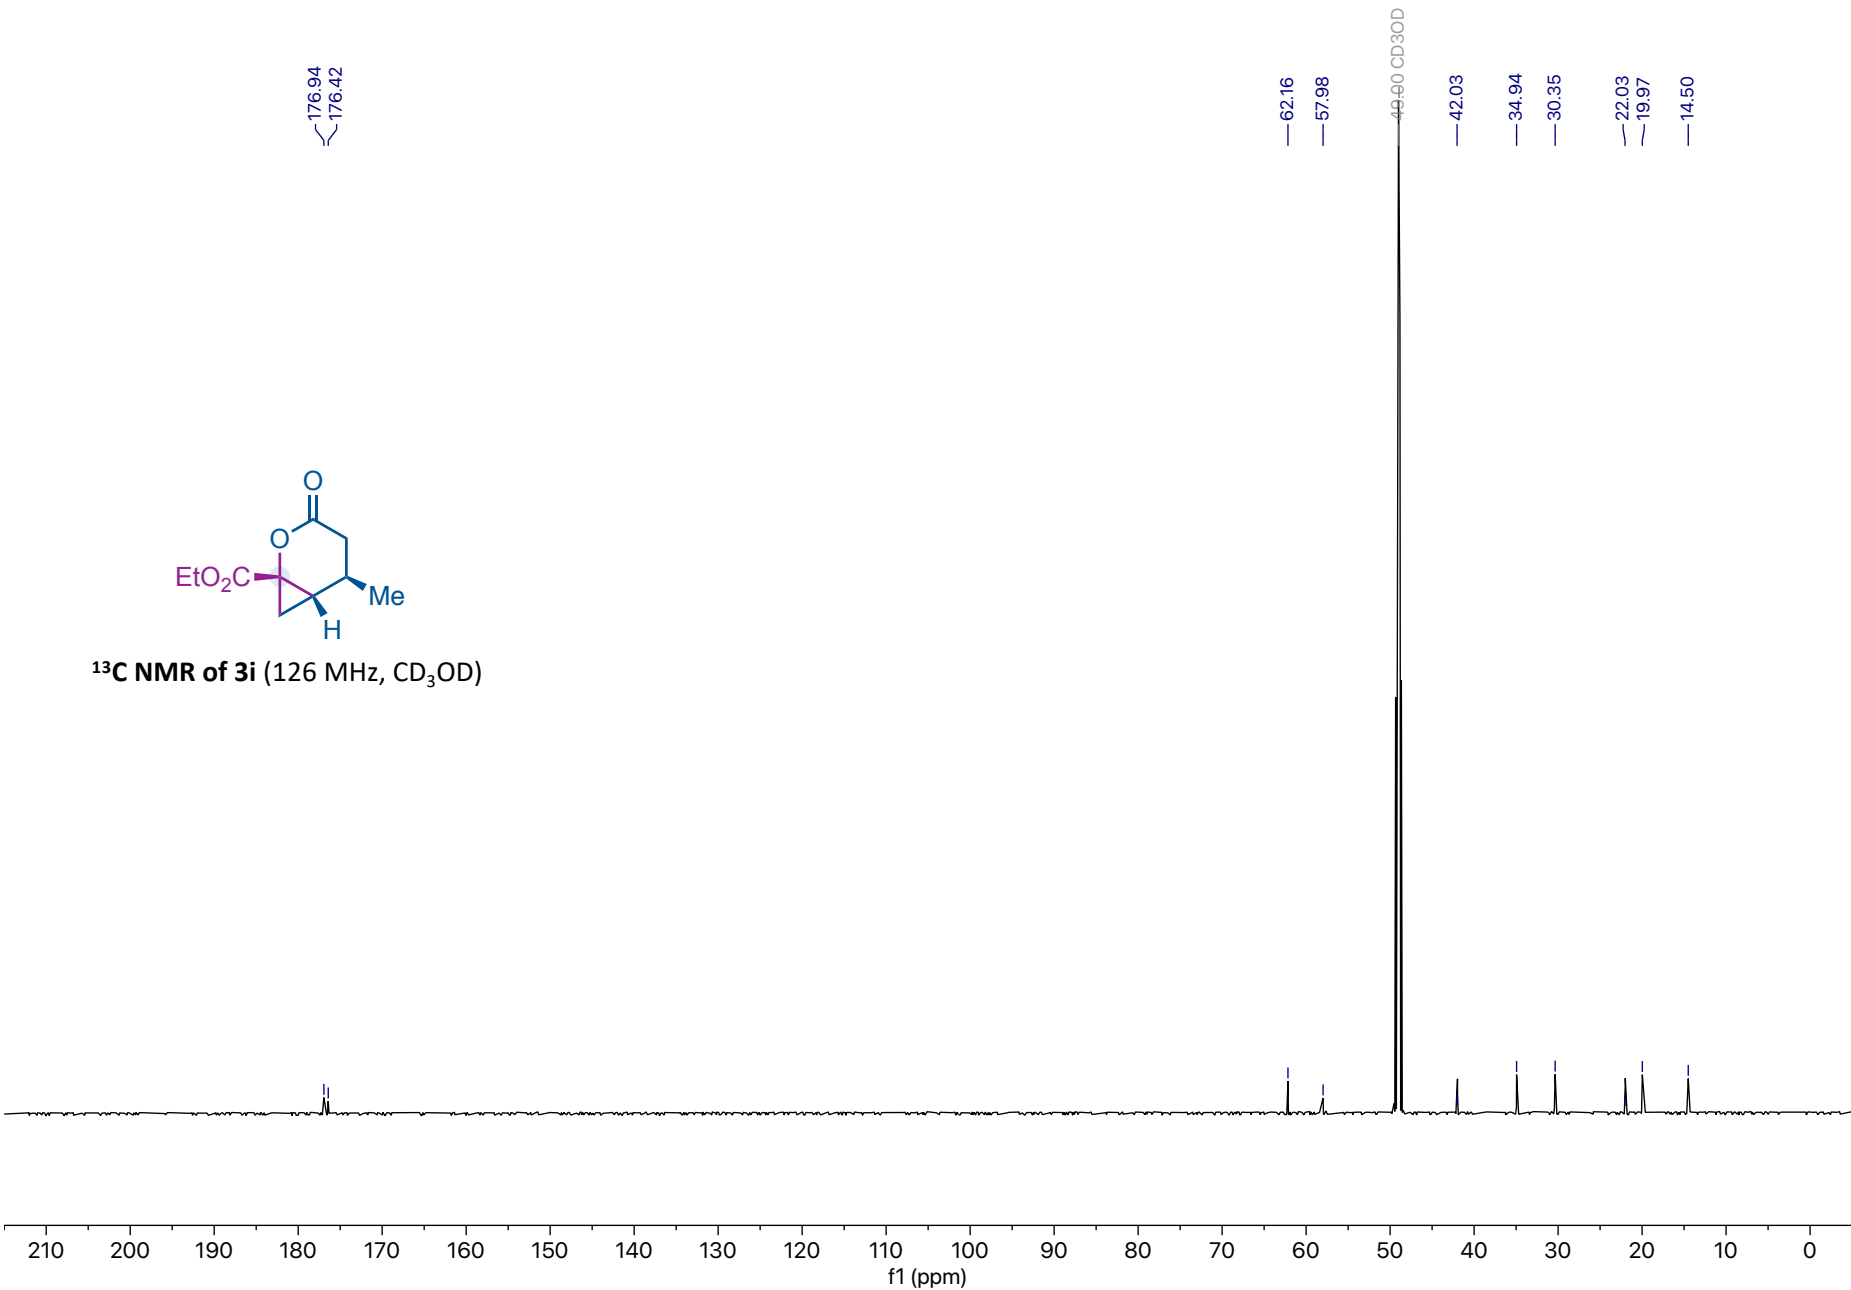

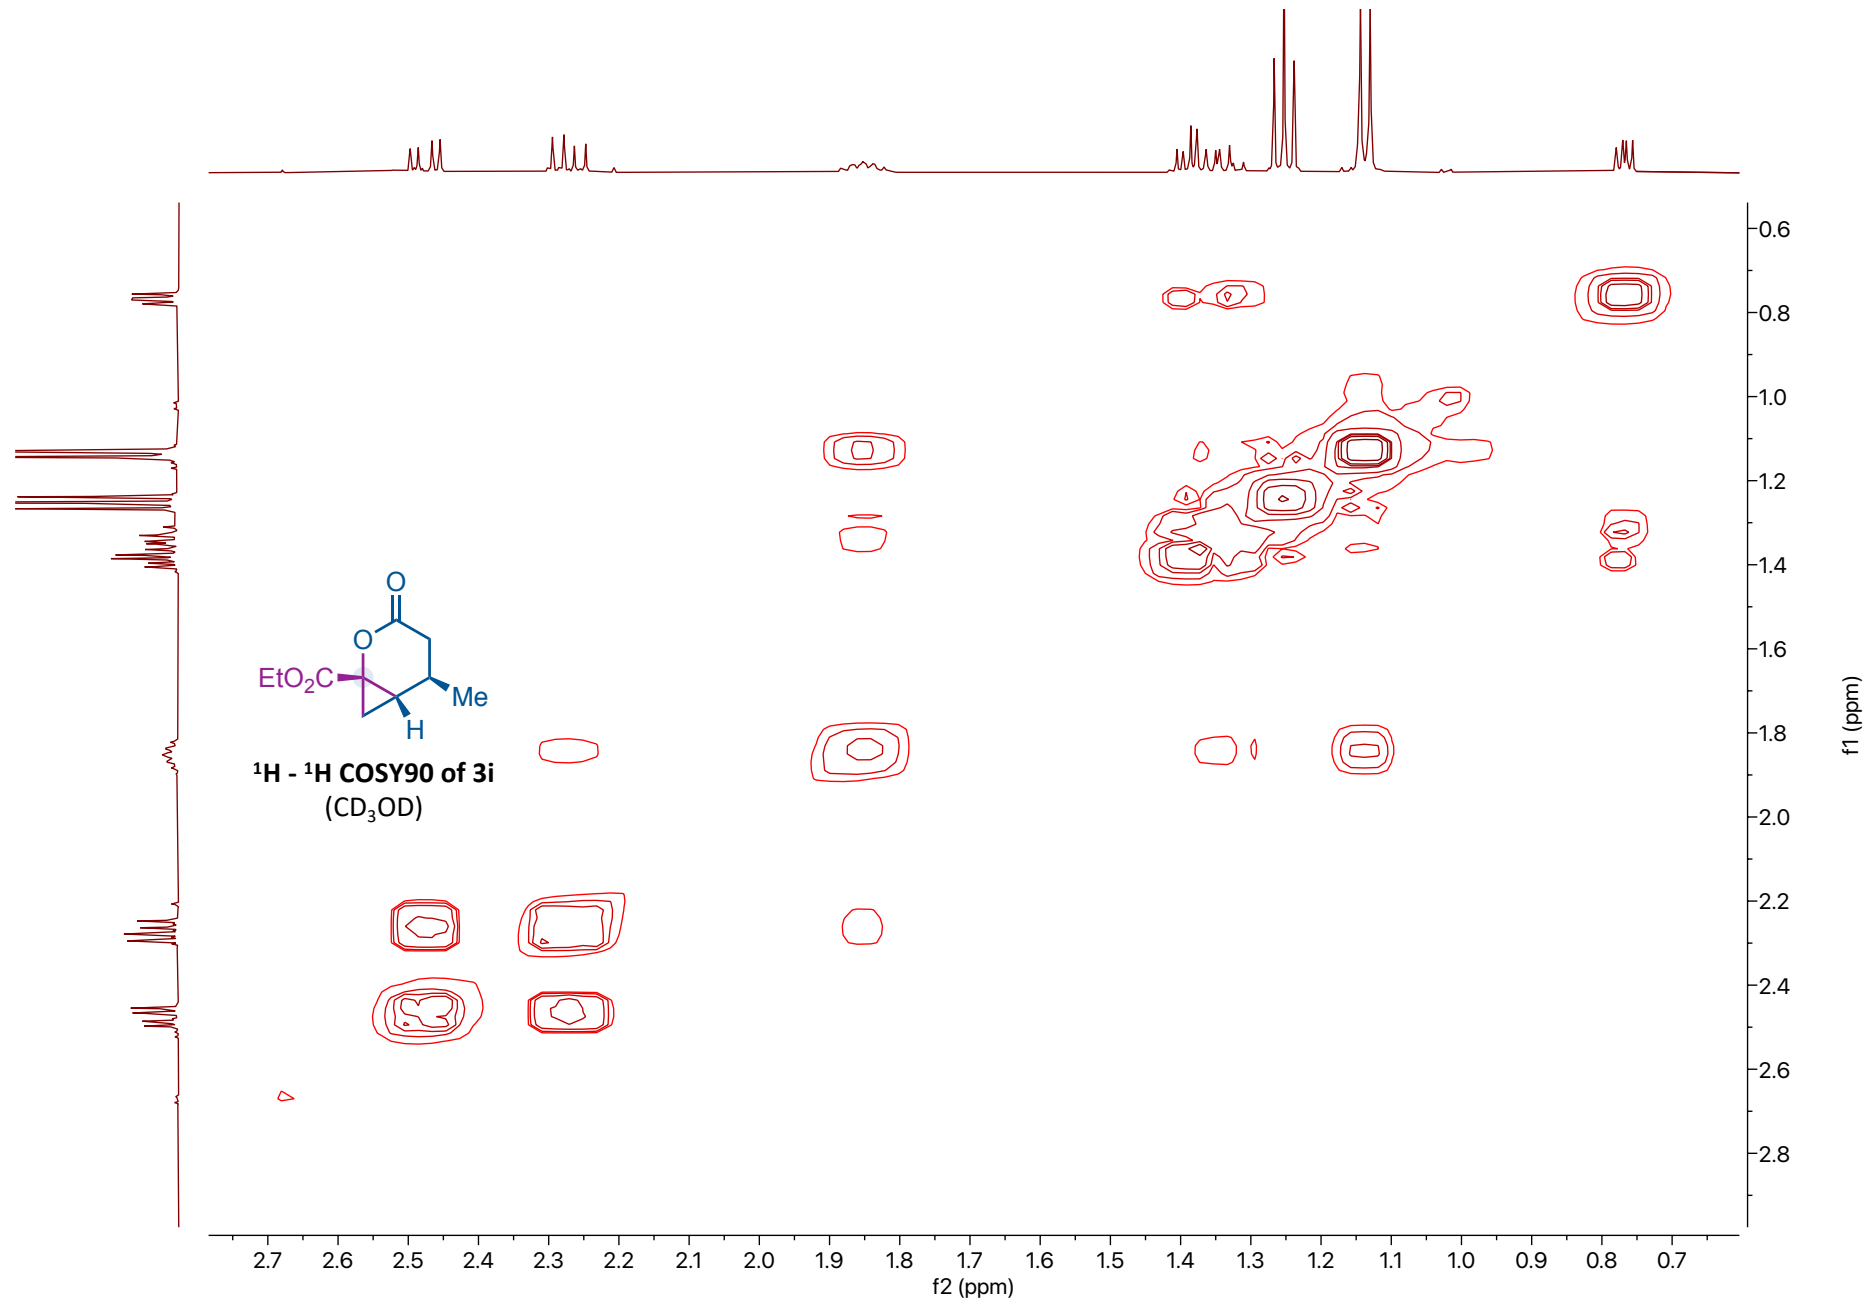

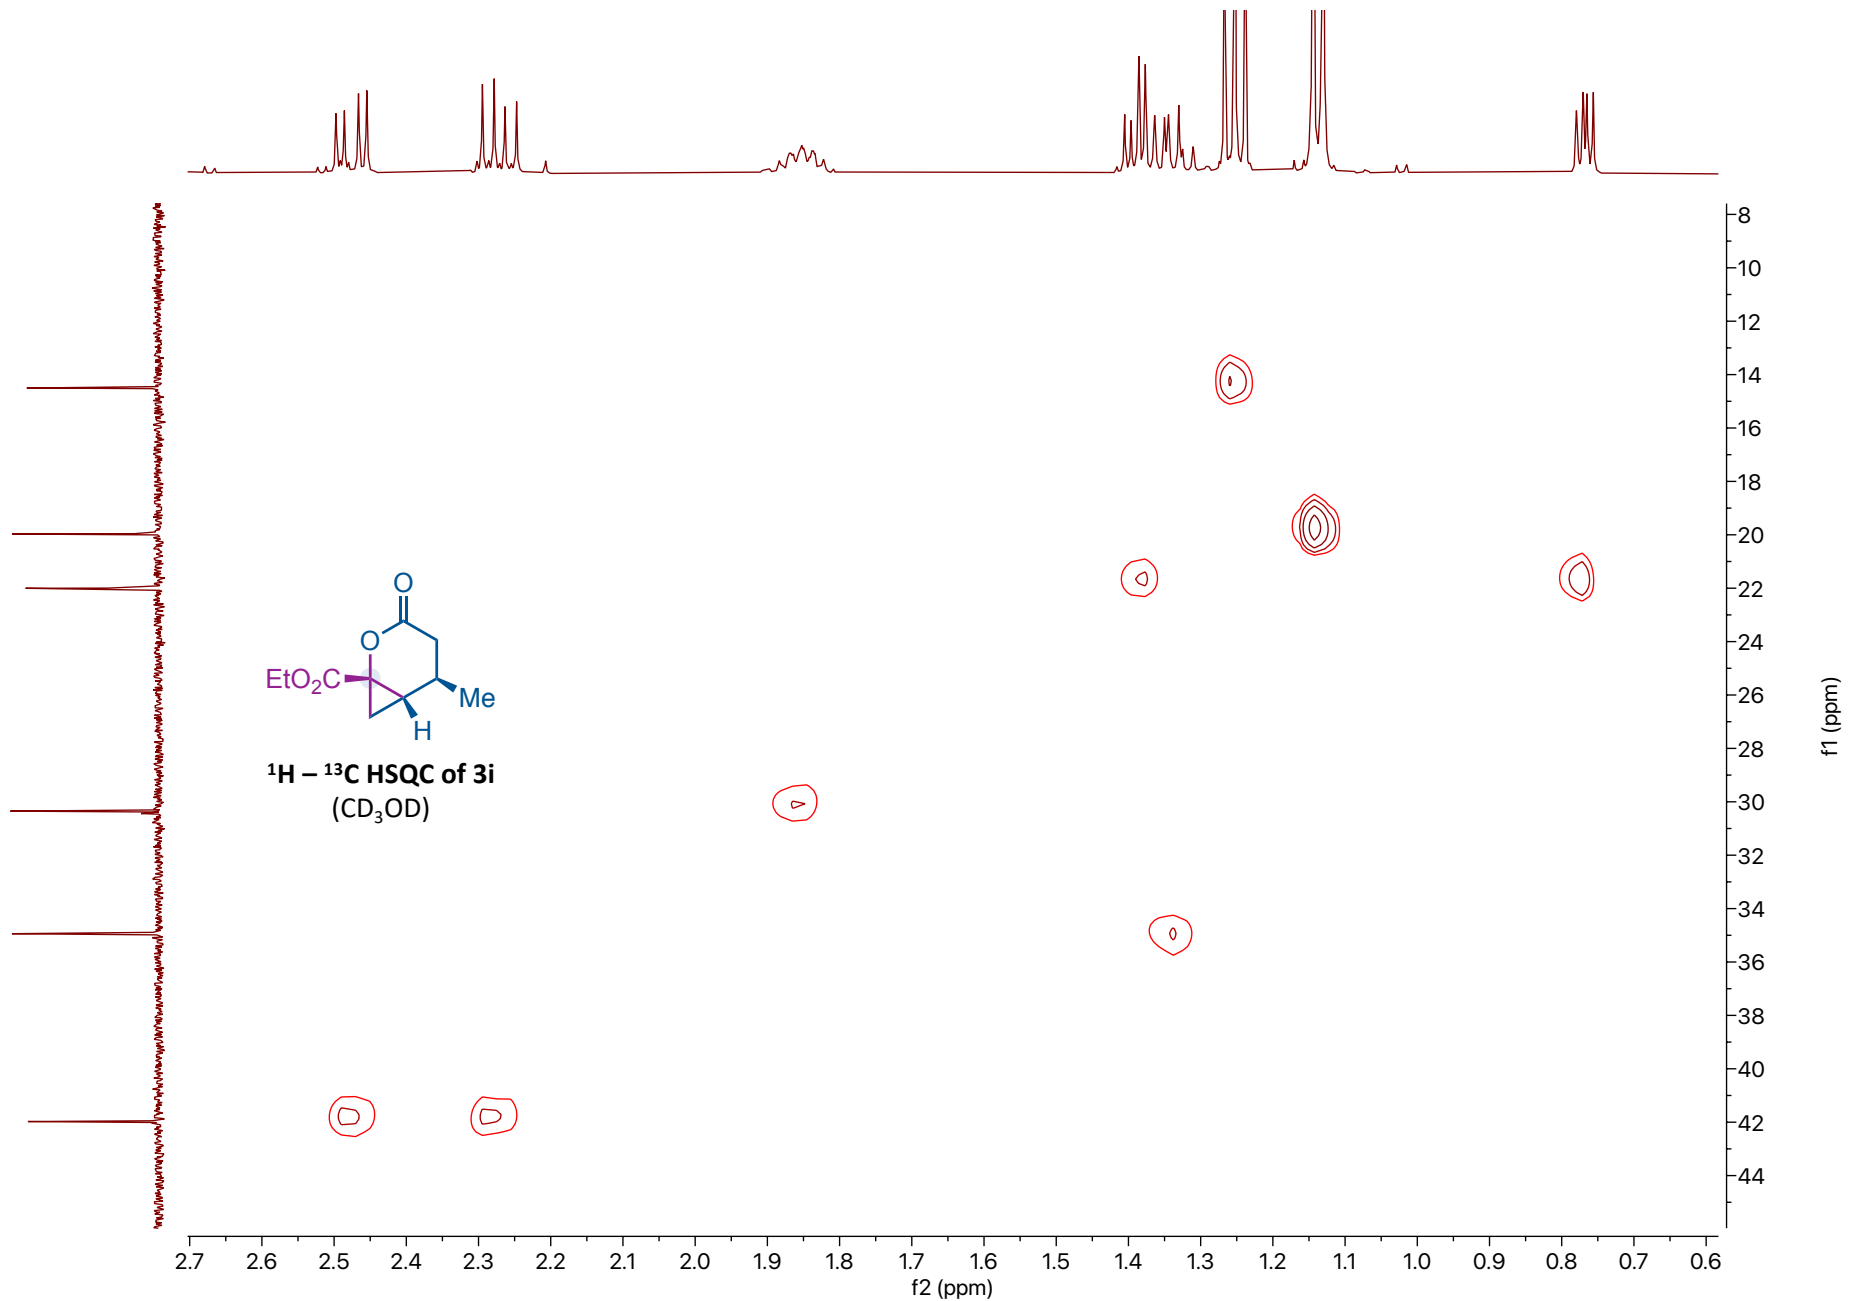

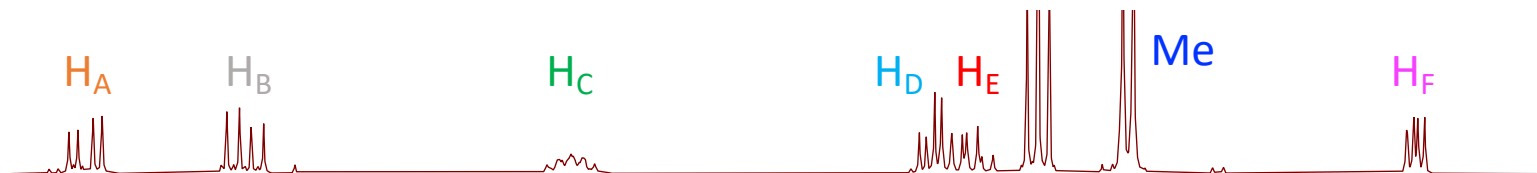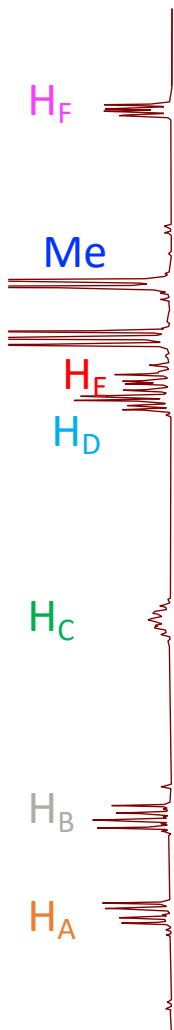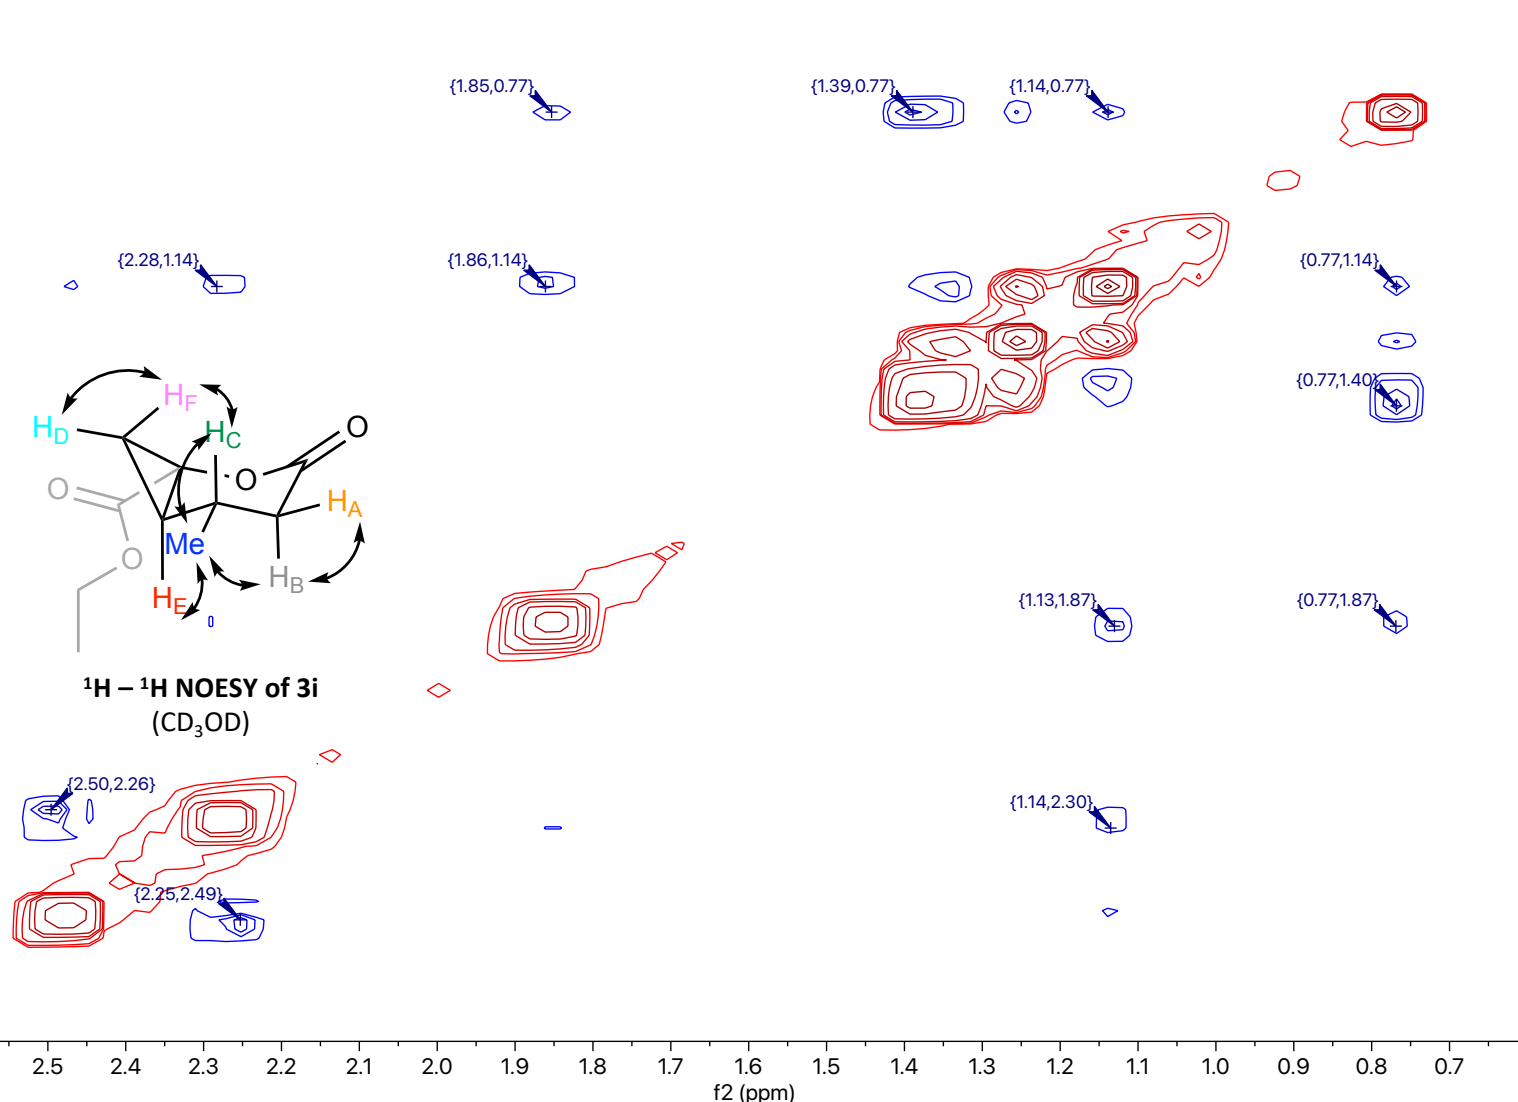

—7.26 CDCl<sub>3</sub>

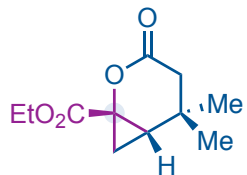

<sup>1</sup>H NMR of 3j (400 MHz, CDCl<sub>3</sub>)

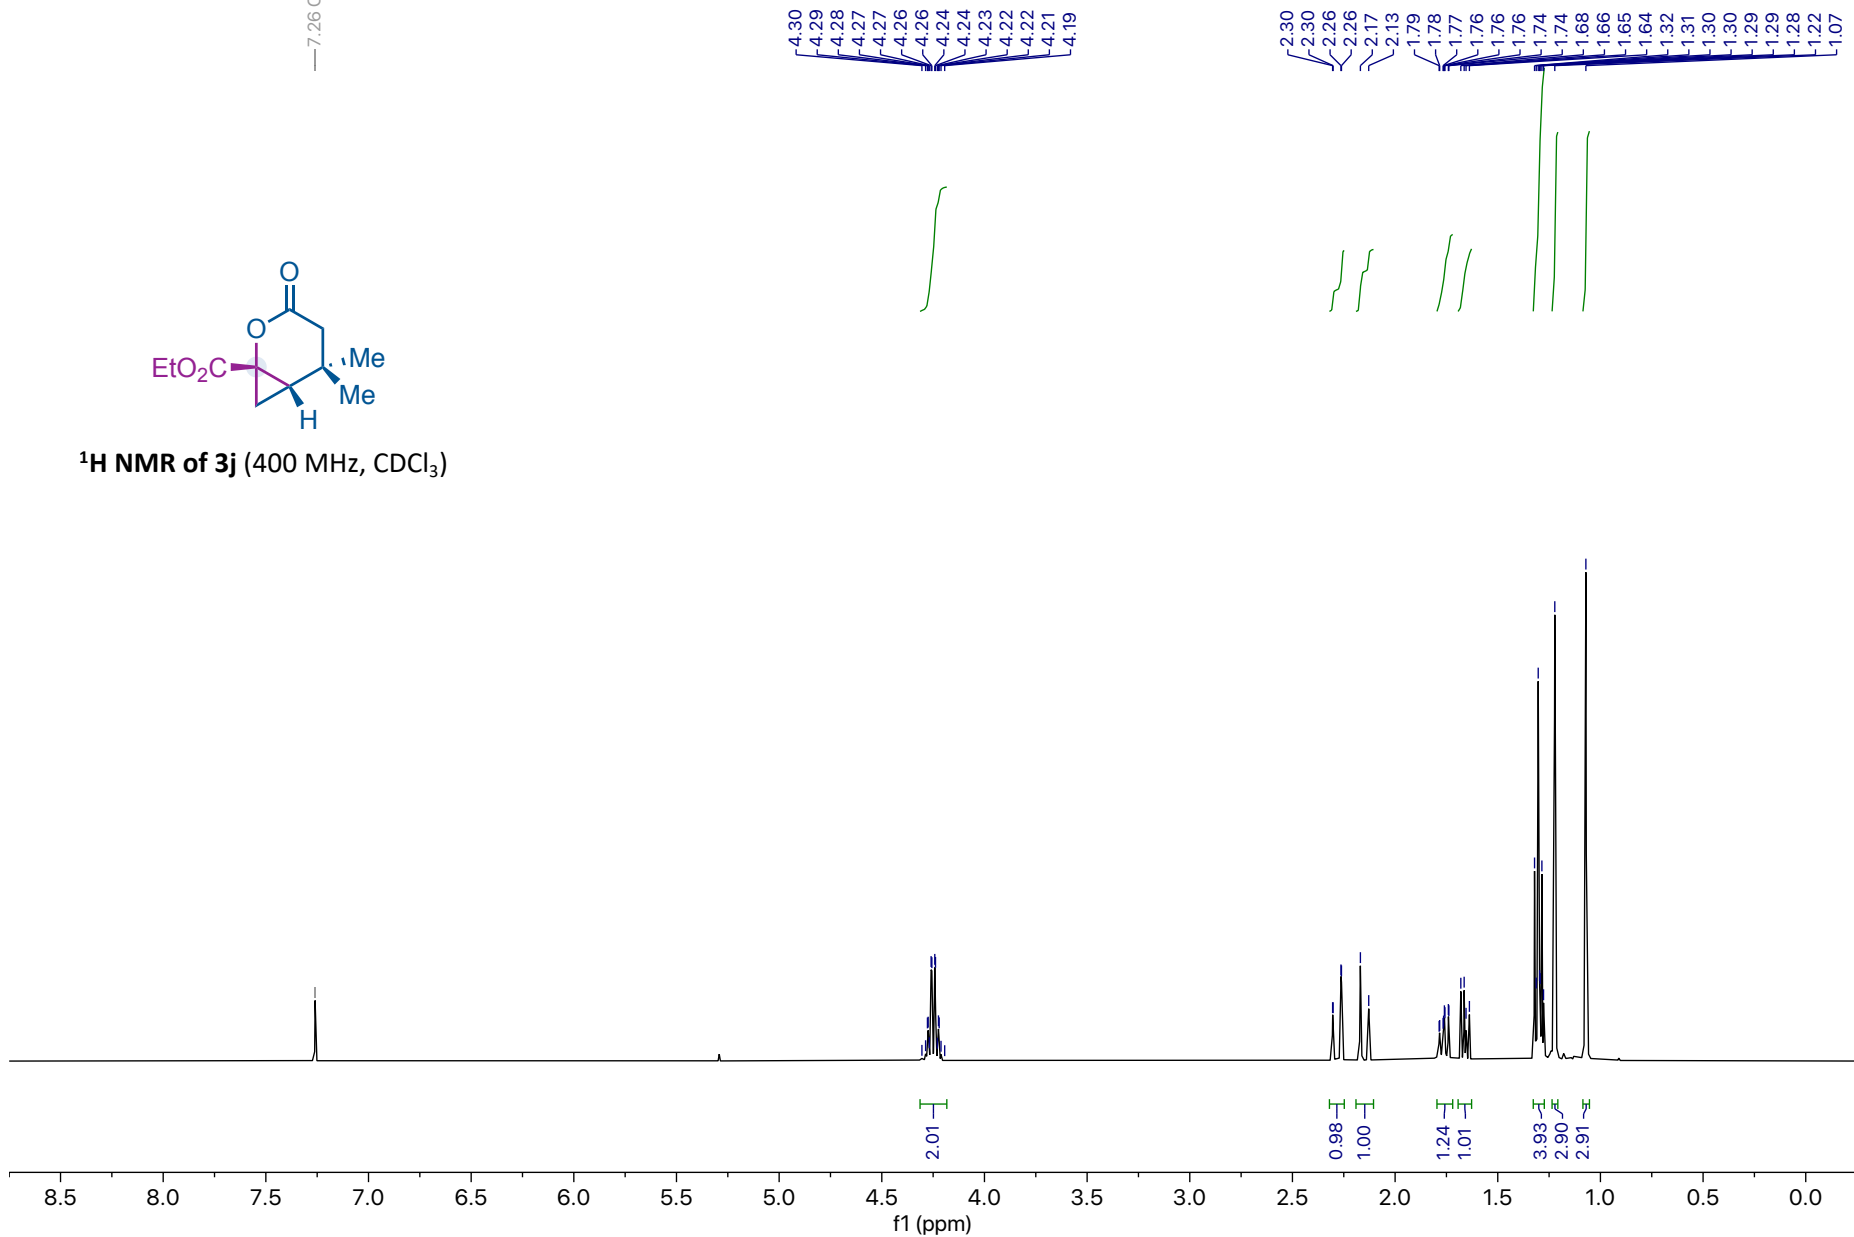

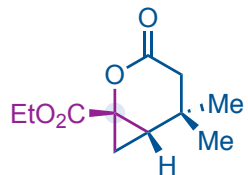

<sup>13</sup>C NMR of 3j (101 MHz, CDCl<sub>3</sub>)

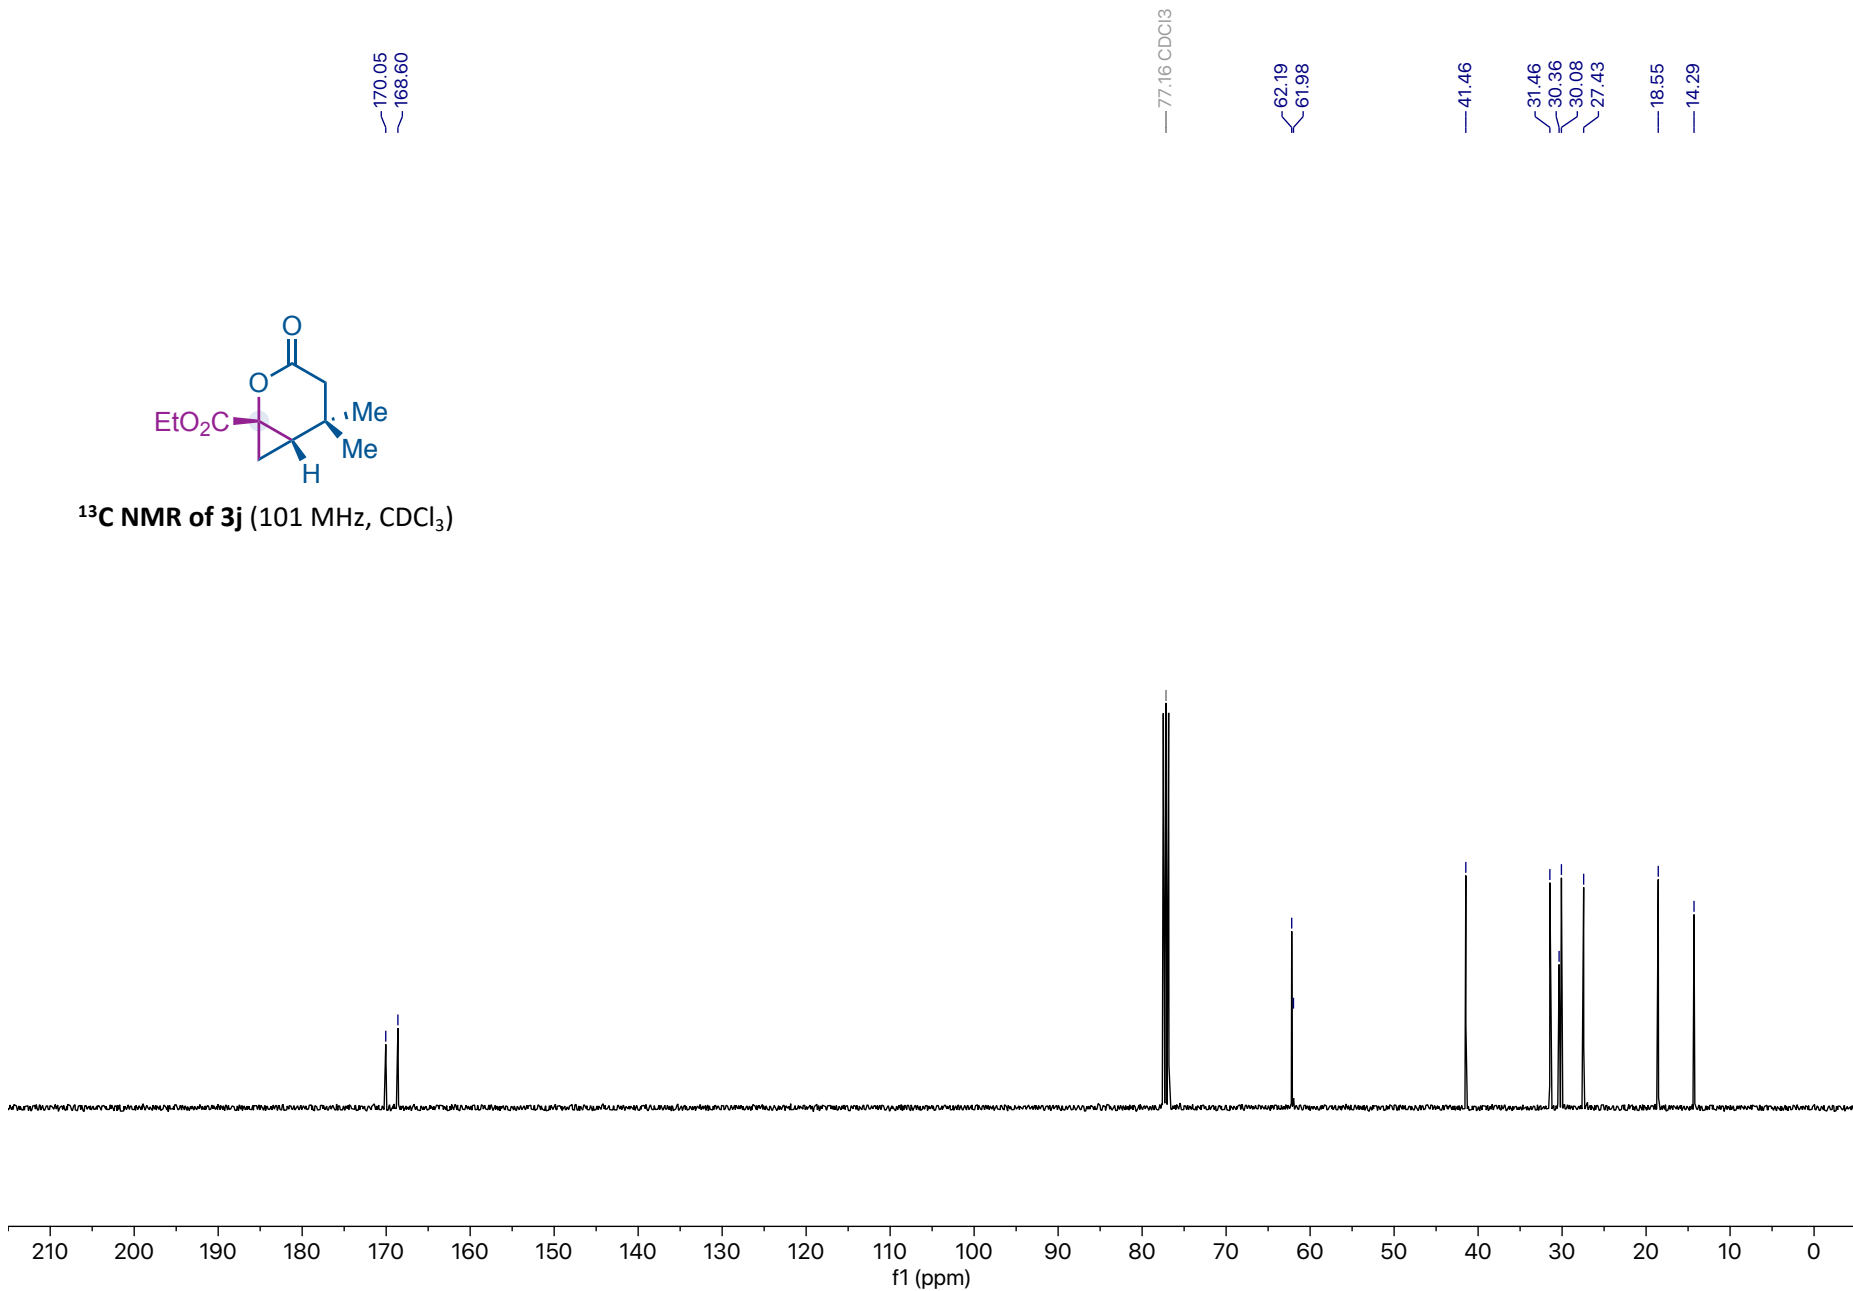



7.26 CDCl<sub>3</sub>  
 4.27  
 4.26  
 4.25  
 4.25  
 4.23  
 4.23  
 4.21  
 4.21  
 2.31  
 2.28  
 2.18  
 2.14  
 1.81  
 1.80  
 1.78  
 1.77  
 1.76  
 1.74  
 1.73  
 1.71  
 1.66  
 1.66  
 1.65  
 1.64  
 1.64  
 1.63  
 1.62  
 1.62  
 1.61  
 1.60  
 1.59  
 1.59  
 1.57  
 1.57  
 1.56  
 1.55  
 1.55  
 1.54  
 1.53  
 1.53  
 1.52  
 1.51  
 1.51  
 1.50  
 1.50  
 1.49  
 1.48  
 1.47  
 1.47  
 1.46  
 1.46  
 1.45  
 1.45  
 1.43  
 1.42  
 1.42  
 1.40  
 1.40  
 1.39  
 1.39  
 1.37  
 1.36  
 1.35  
 1.35  
 1.34  
 1.34  
 1.33  
 1.33  
 1.31  
 1.30  
 1.28  
 1.25  
 1.24  
 1.24  
 1.22  
 1.22  
 1.21  
 1.20  
 1.18  
 1.17  
 1.16  
 1.15

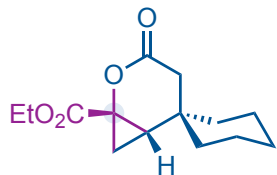

<sup>1</sup>H NMR 3k (400 MHz, CDCl<sub>3</sub>)

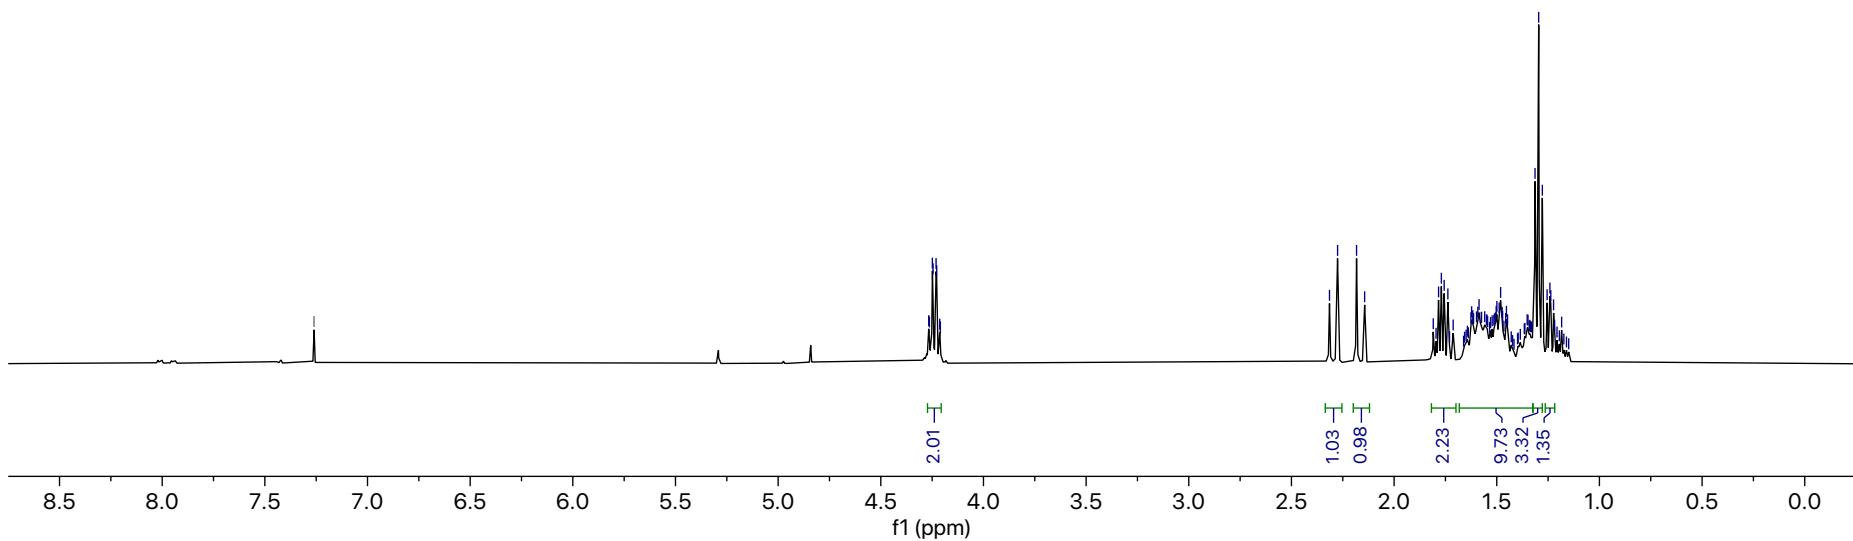

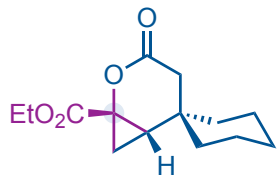

<sup>13</sup>C NMR of 3k (101 MHz, CDCl<sub>3</sub>)

170.38  
169.95

77.16 CDCl<sub>3</sub>

62.16  
62.00

41.32  
39.49  
34.49  
34.12  
29.89  
25.46  
21.93  
21.66  
20.00

14.30

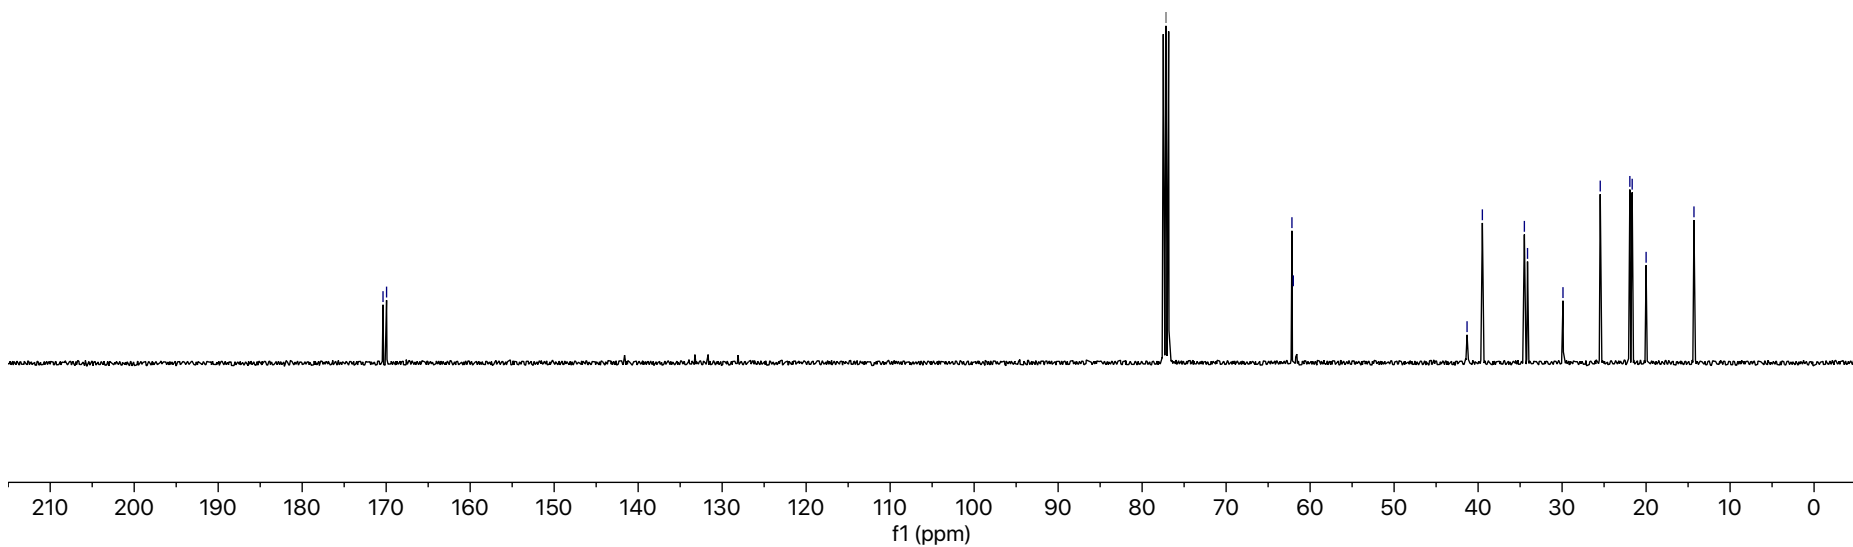

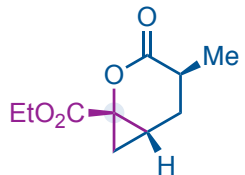

<sup>1</sup>H NMR of **3I** (400 MHz, CDCl<sub>3</sub>)

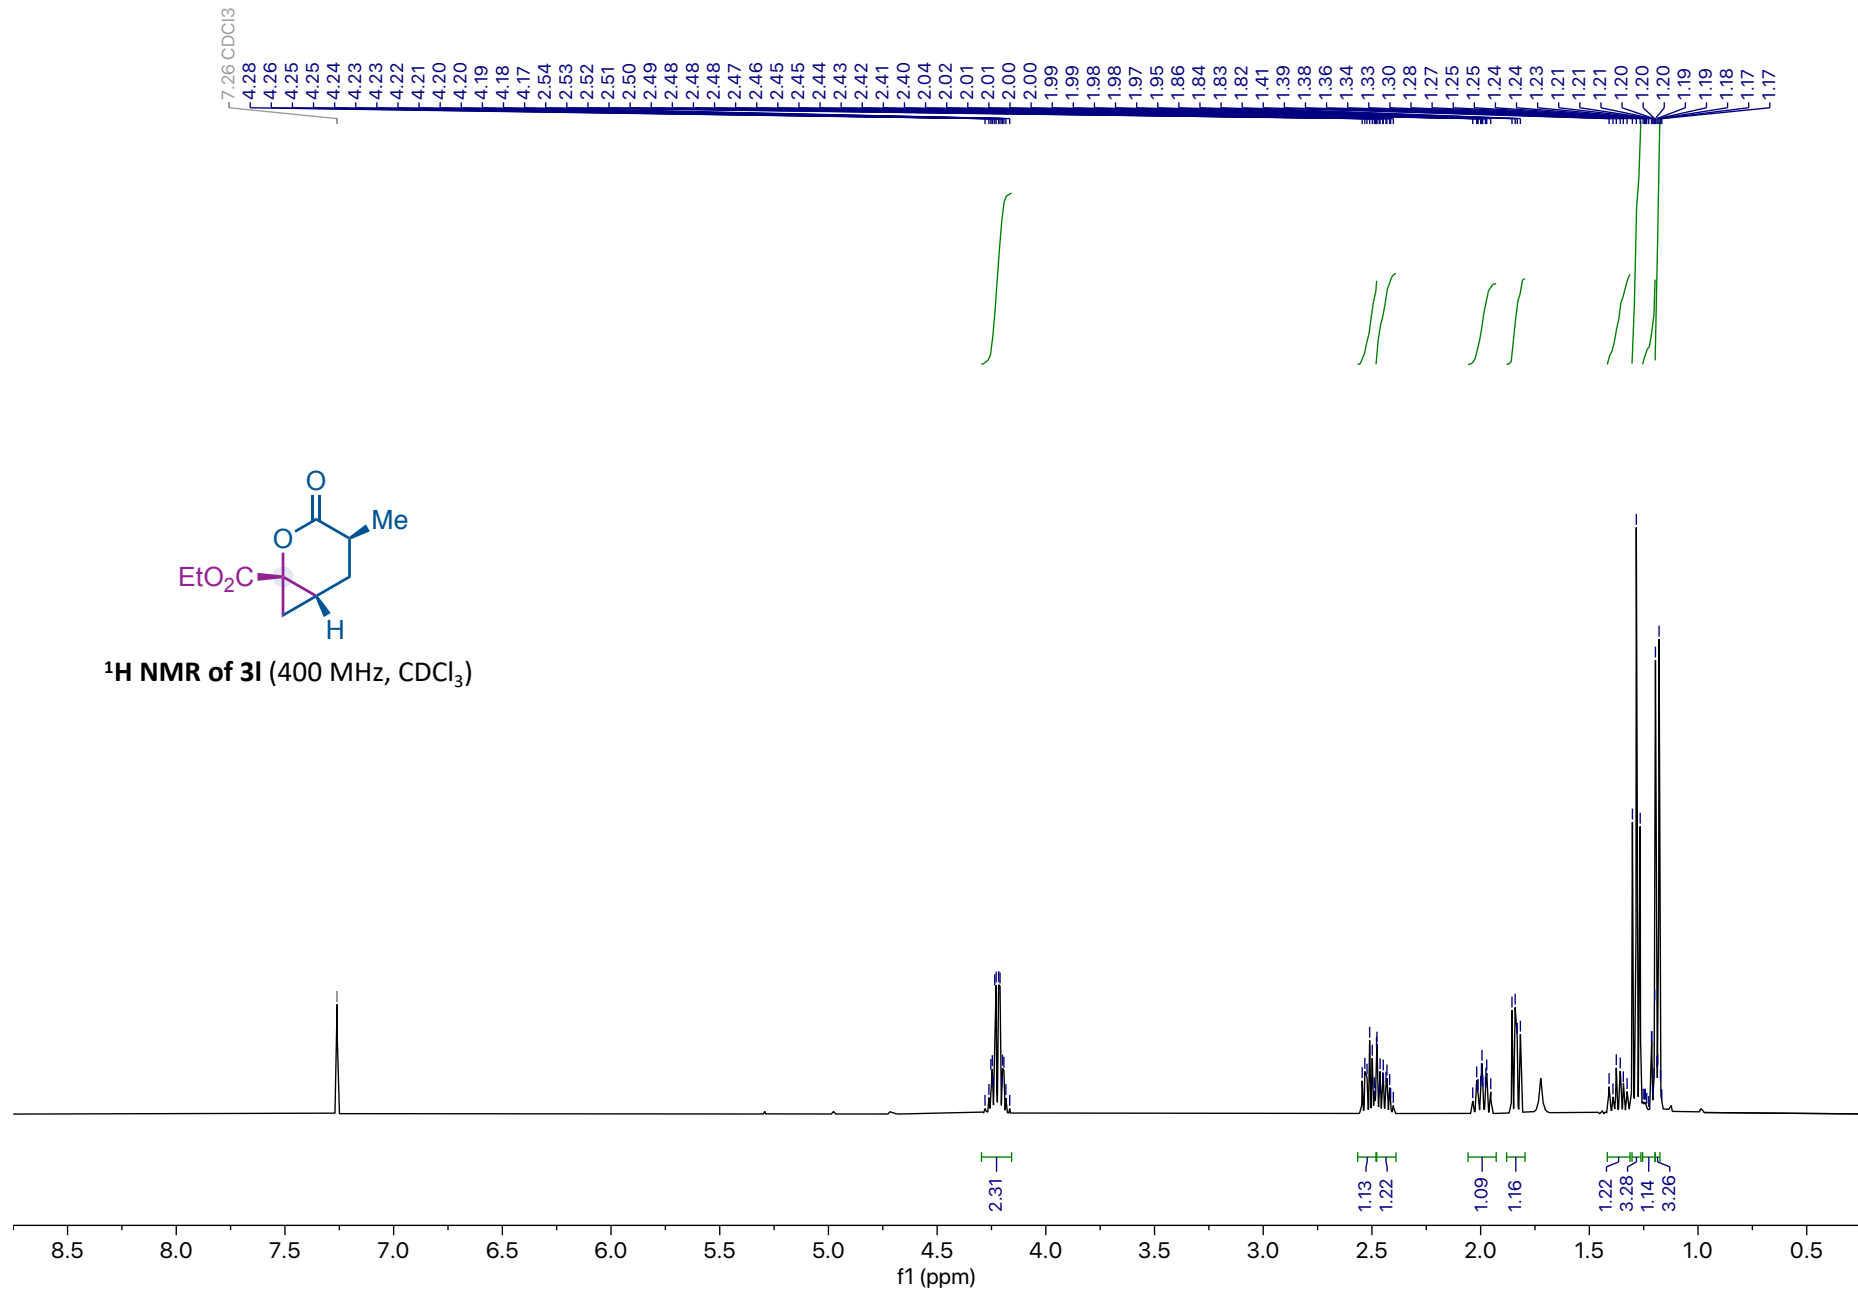

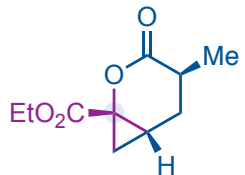

<sup>13</sup>C NMR of 3I (101 MHz, CDCl<sub>3</sub>)

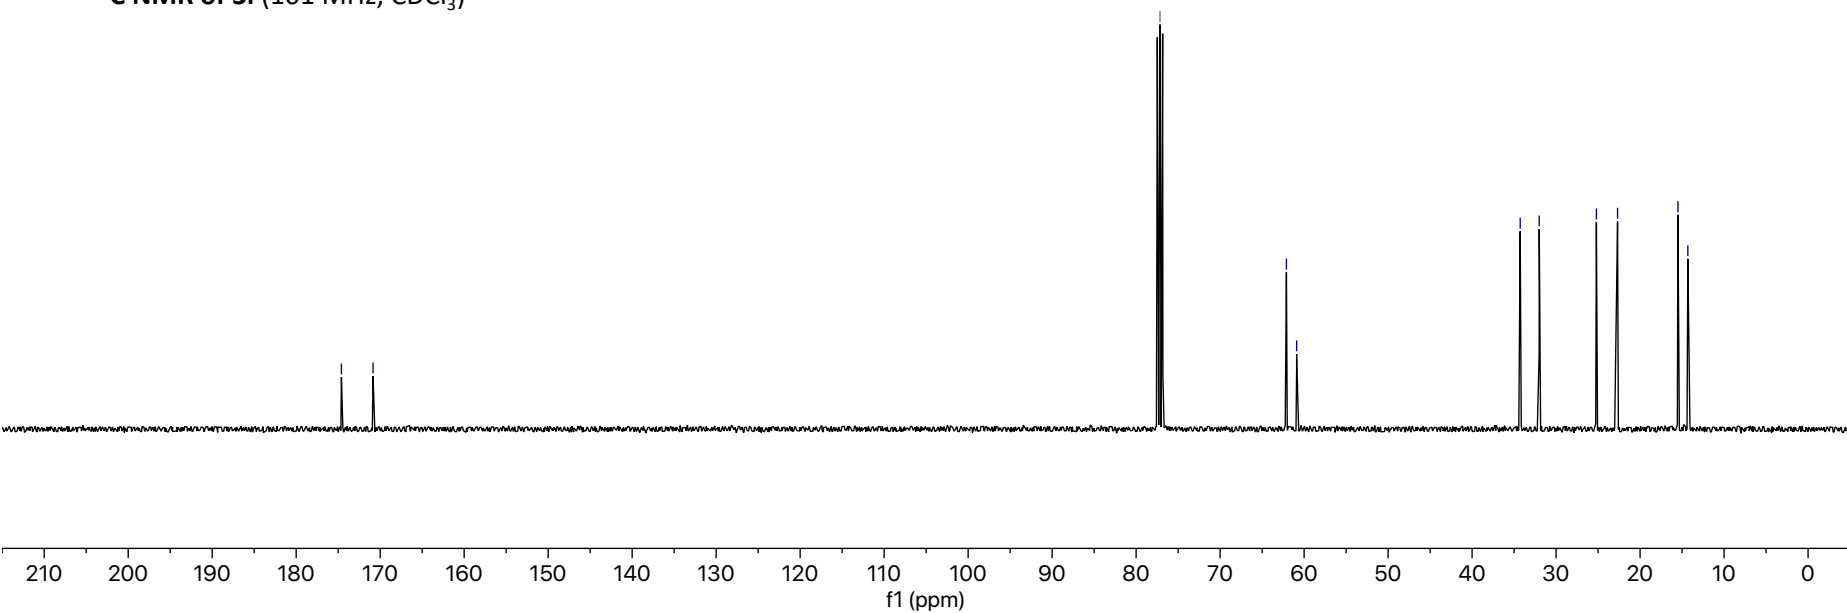

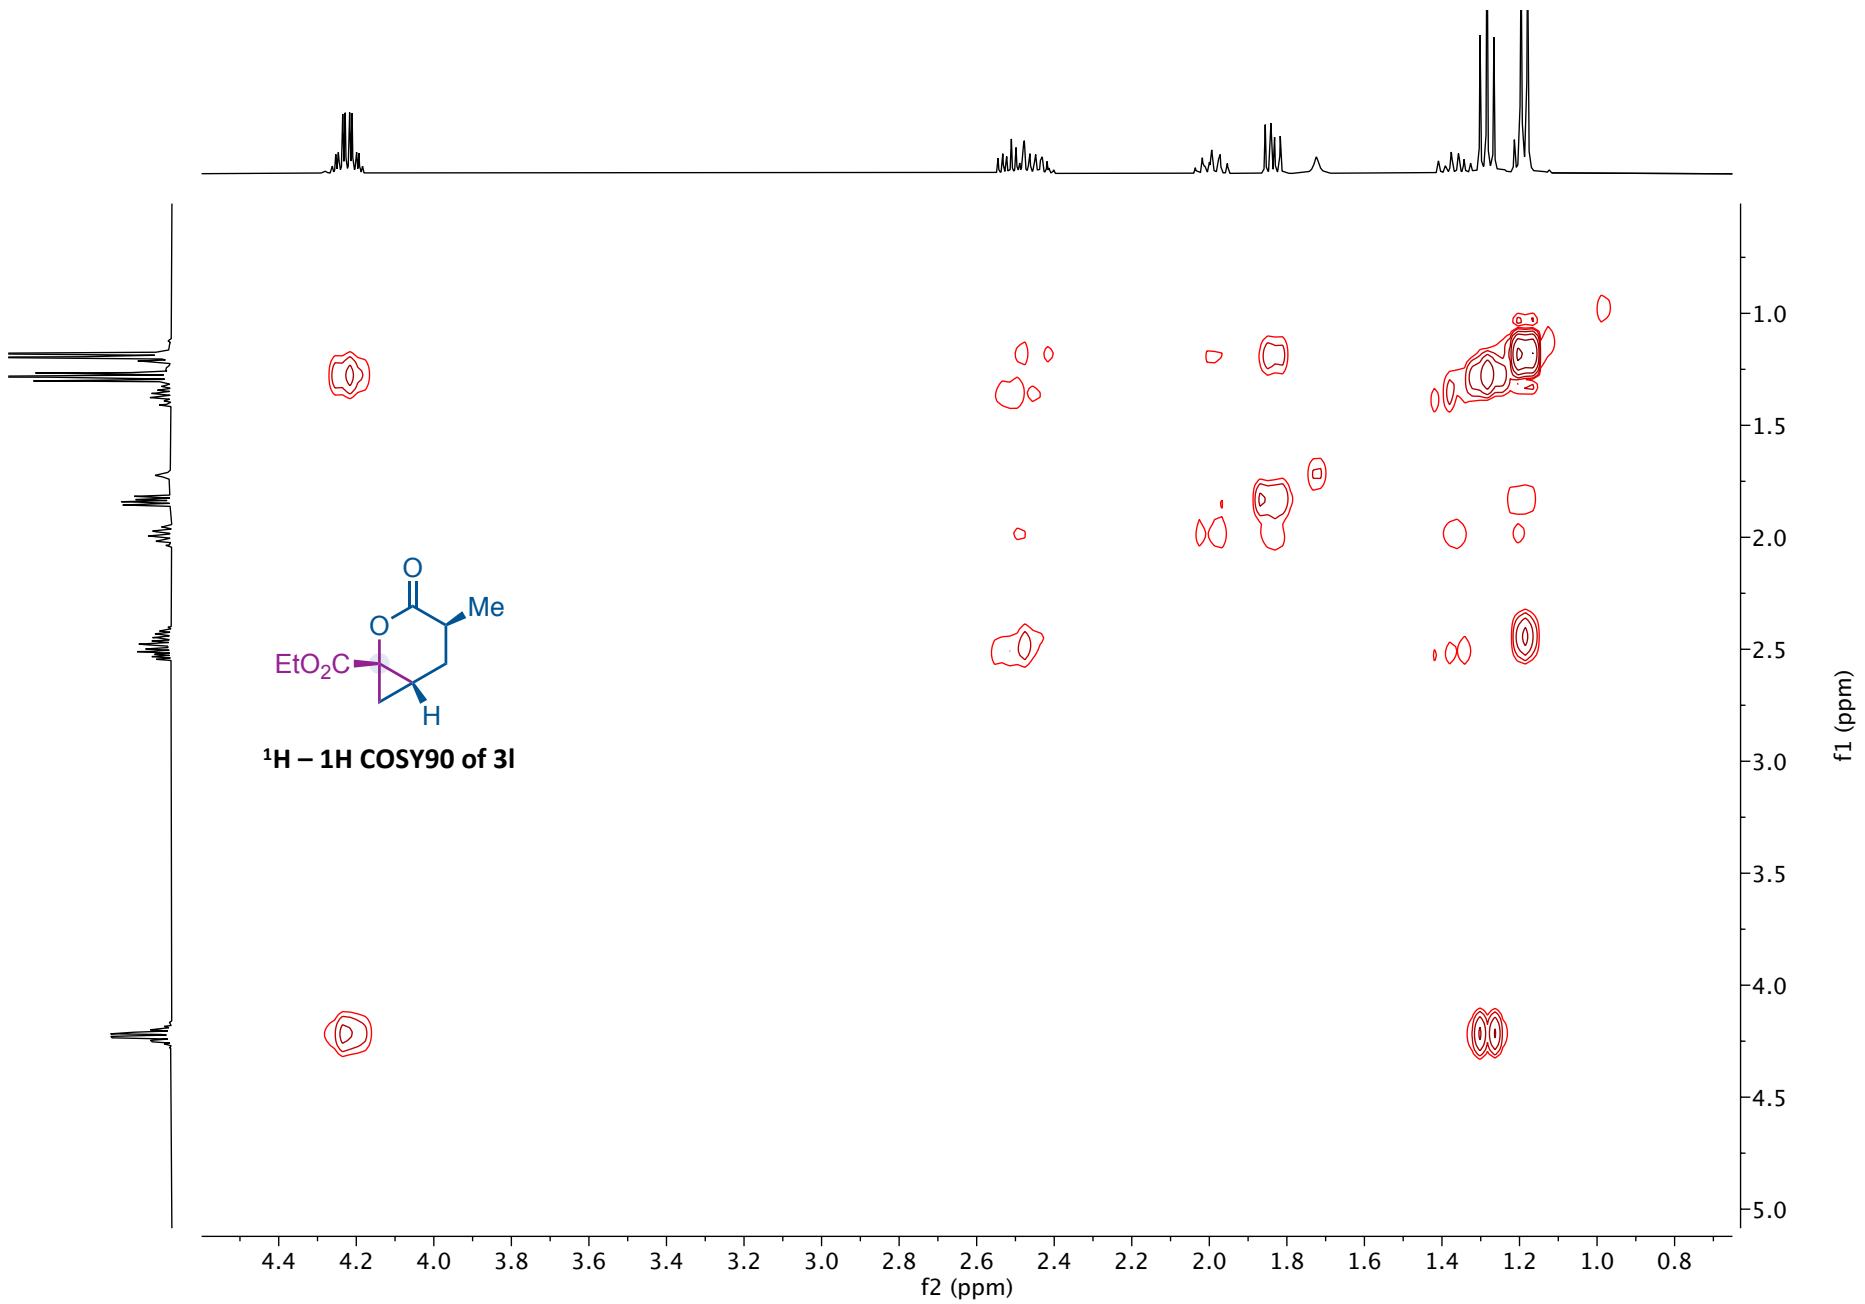

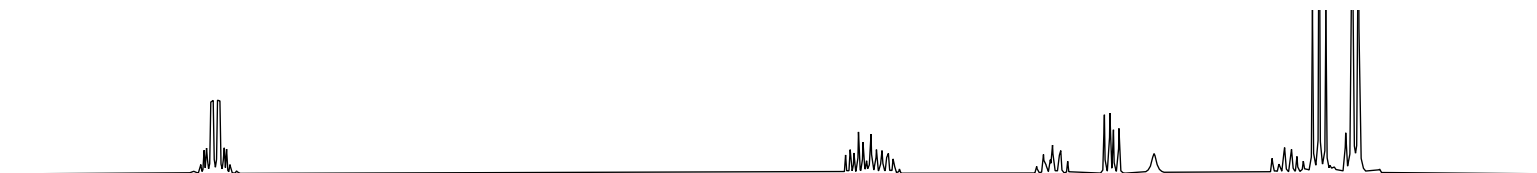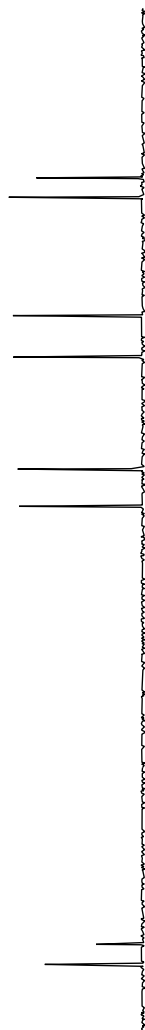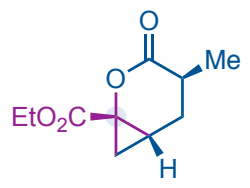

<sup>1</sup>H – <sup>13</sup>C HSQC of 3I

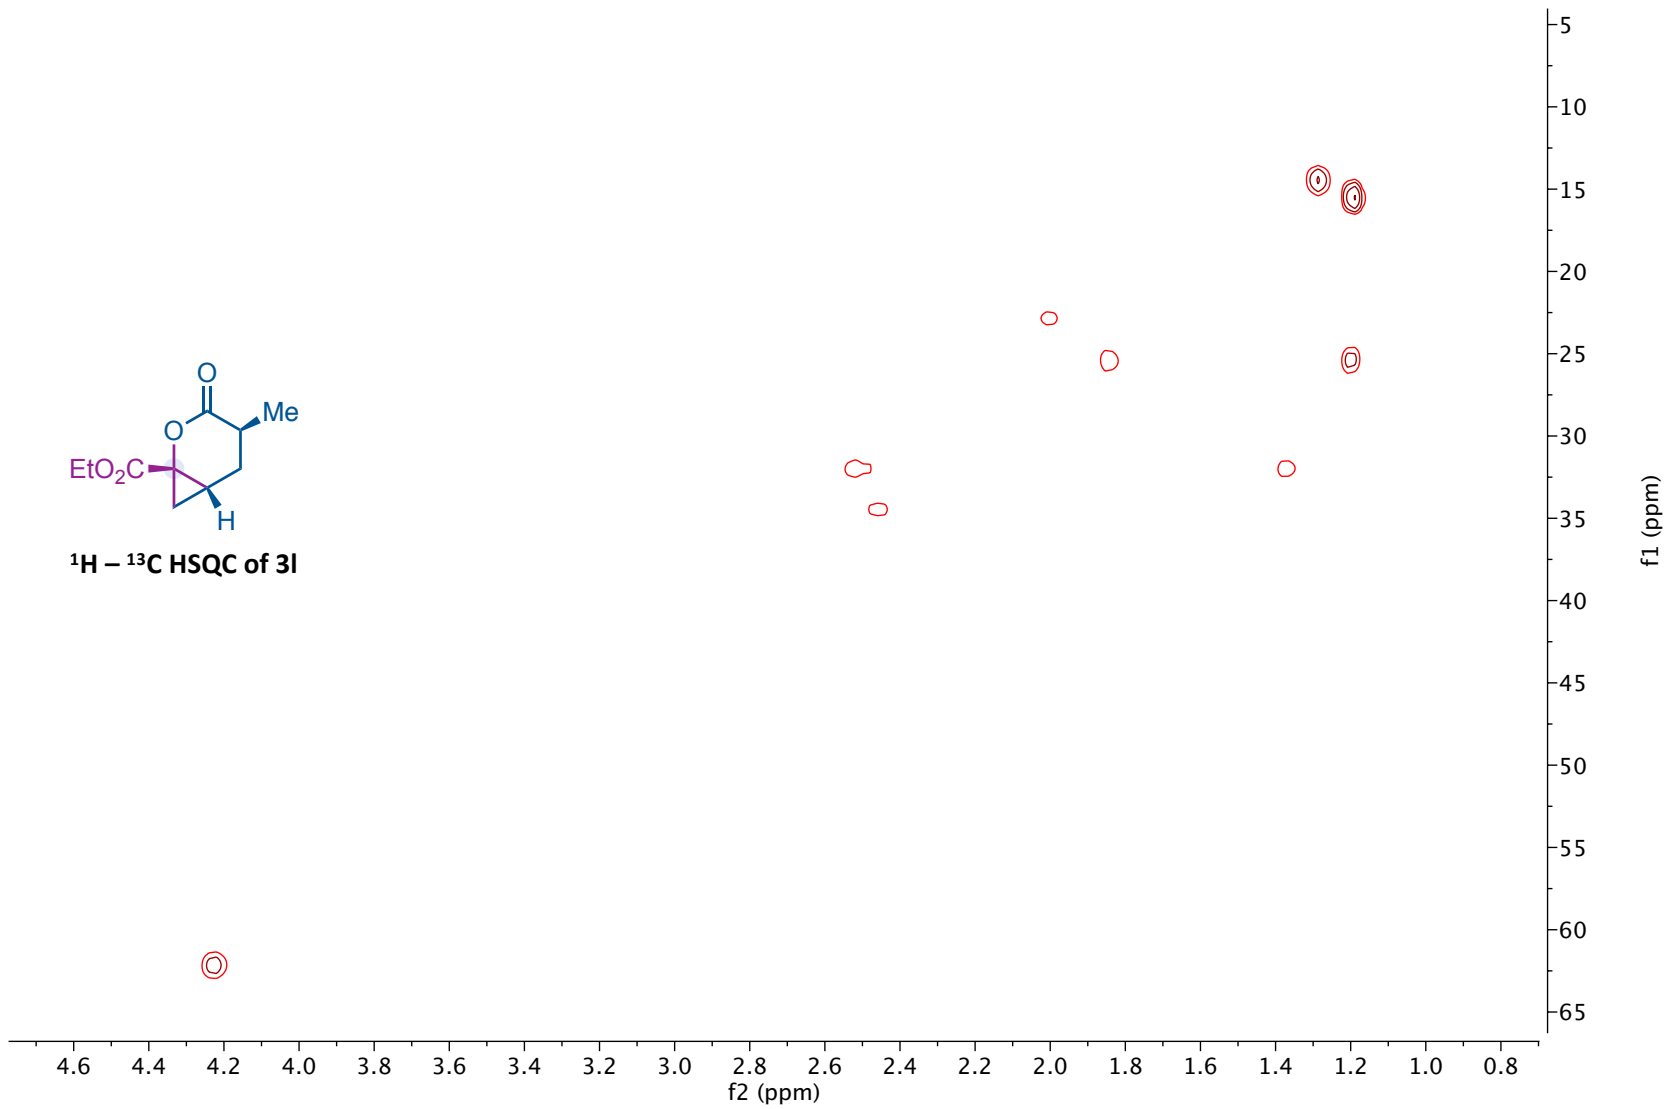

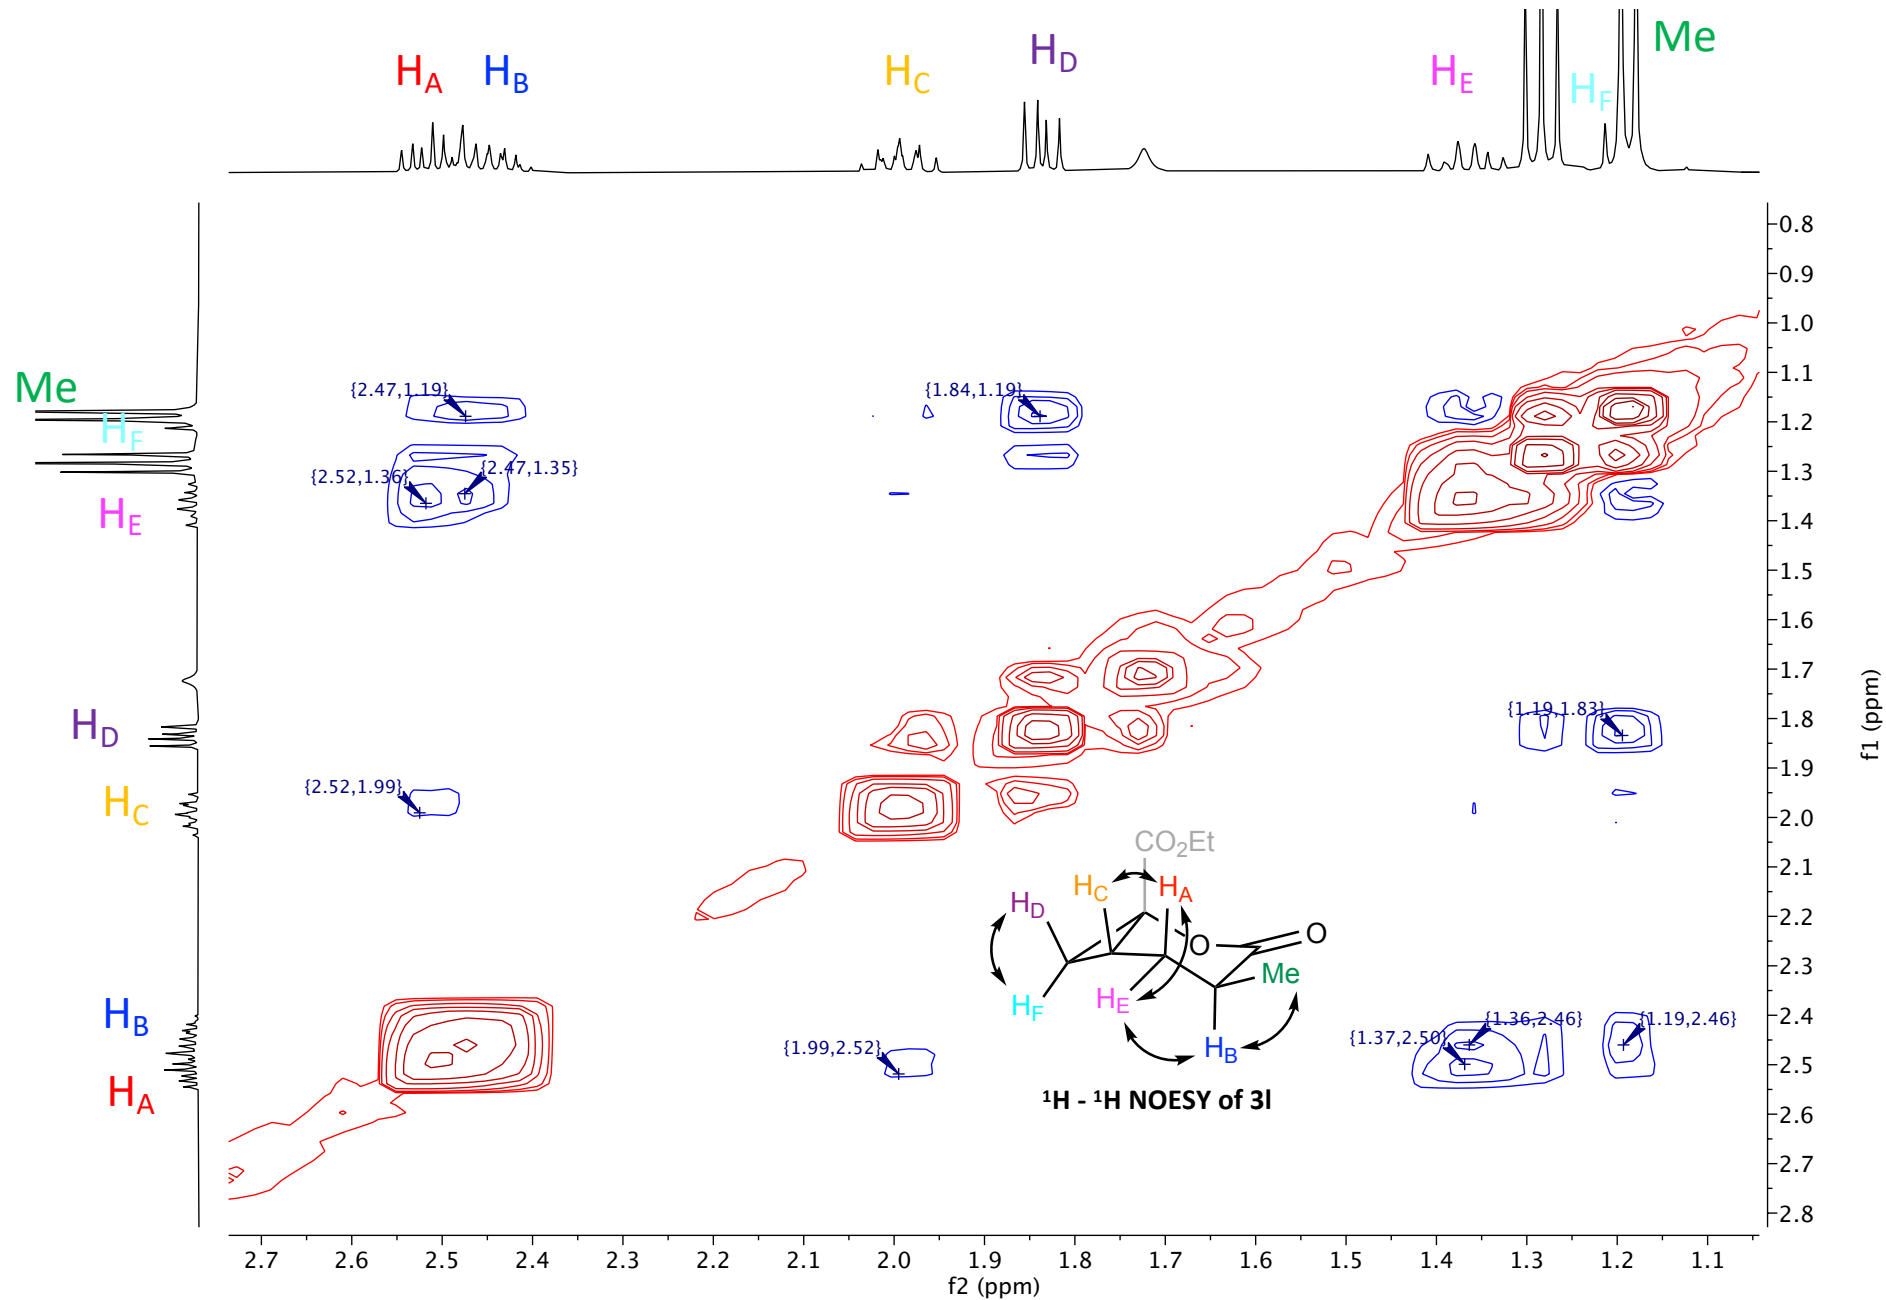

7.89  
7.89  
7.88  
7.87  
7.87  
7.86  
7.77  
7.76  
7.76  
7.75  
7.74  
7.73  
— 7.26 CDCl<sub>3</sub>

5.00  
4.99  
4.97  
4.96  
4.94  
4.93  
4.35  
4.33  
4.33  
4.32  
4.31  
4.30  
4.29  
4.28  
4.27  
4.26  
4.25  
4.24  
4.23  
2.68  
2.66  
2.65  
2.64  
2.63  
2.62  
2.61  
2.60  
2.59  
2.17  
2.15  
2.14  
2.13  
2.12  
2.11  
2.10  
2.08  
1.98  
1.97  
1.96  
1.94  
1.51  
1.49  
1.49  
1.47  
1.35  
1.33  
1.32

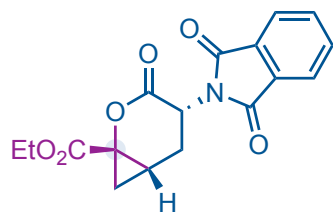

<sup>1</sup>H NMR of 3m (400 MHz, CDCl<sub>3</sub>)

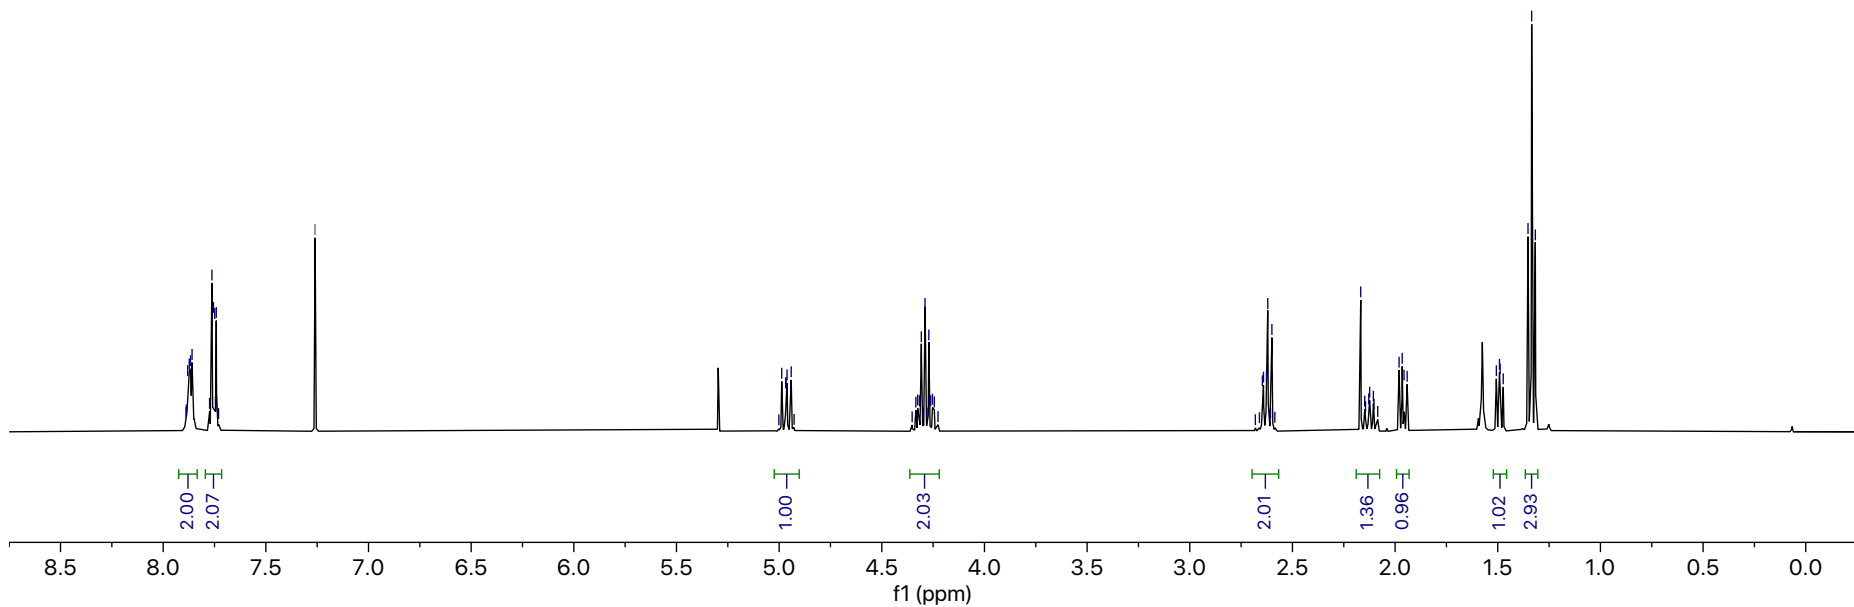



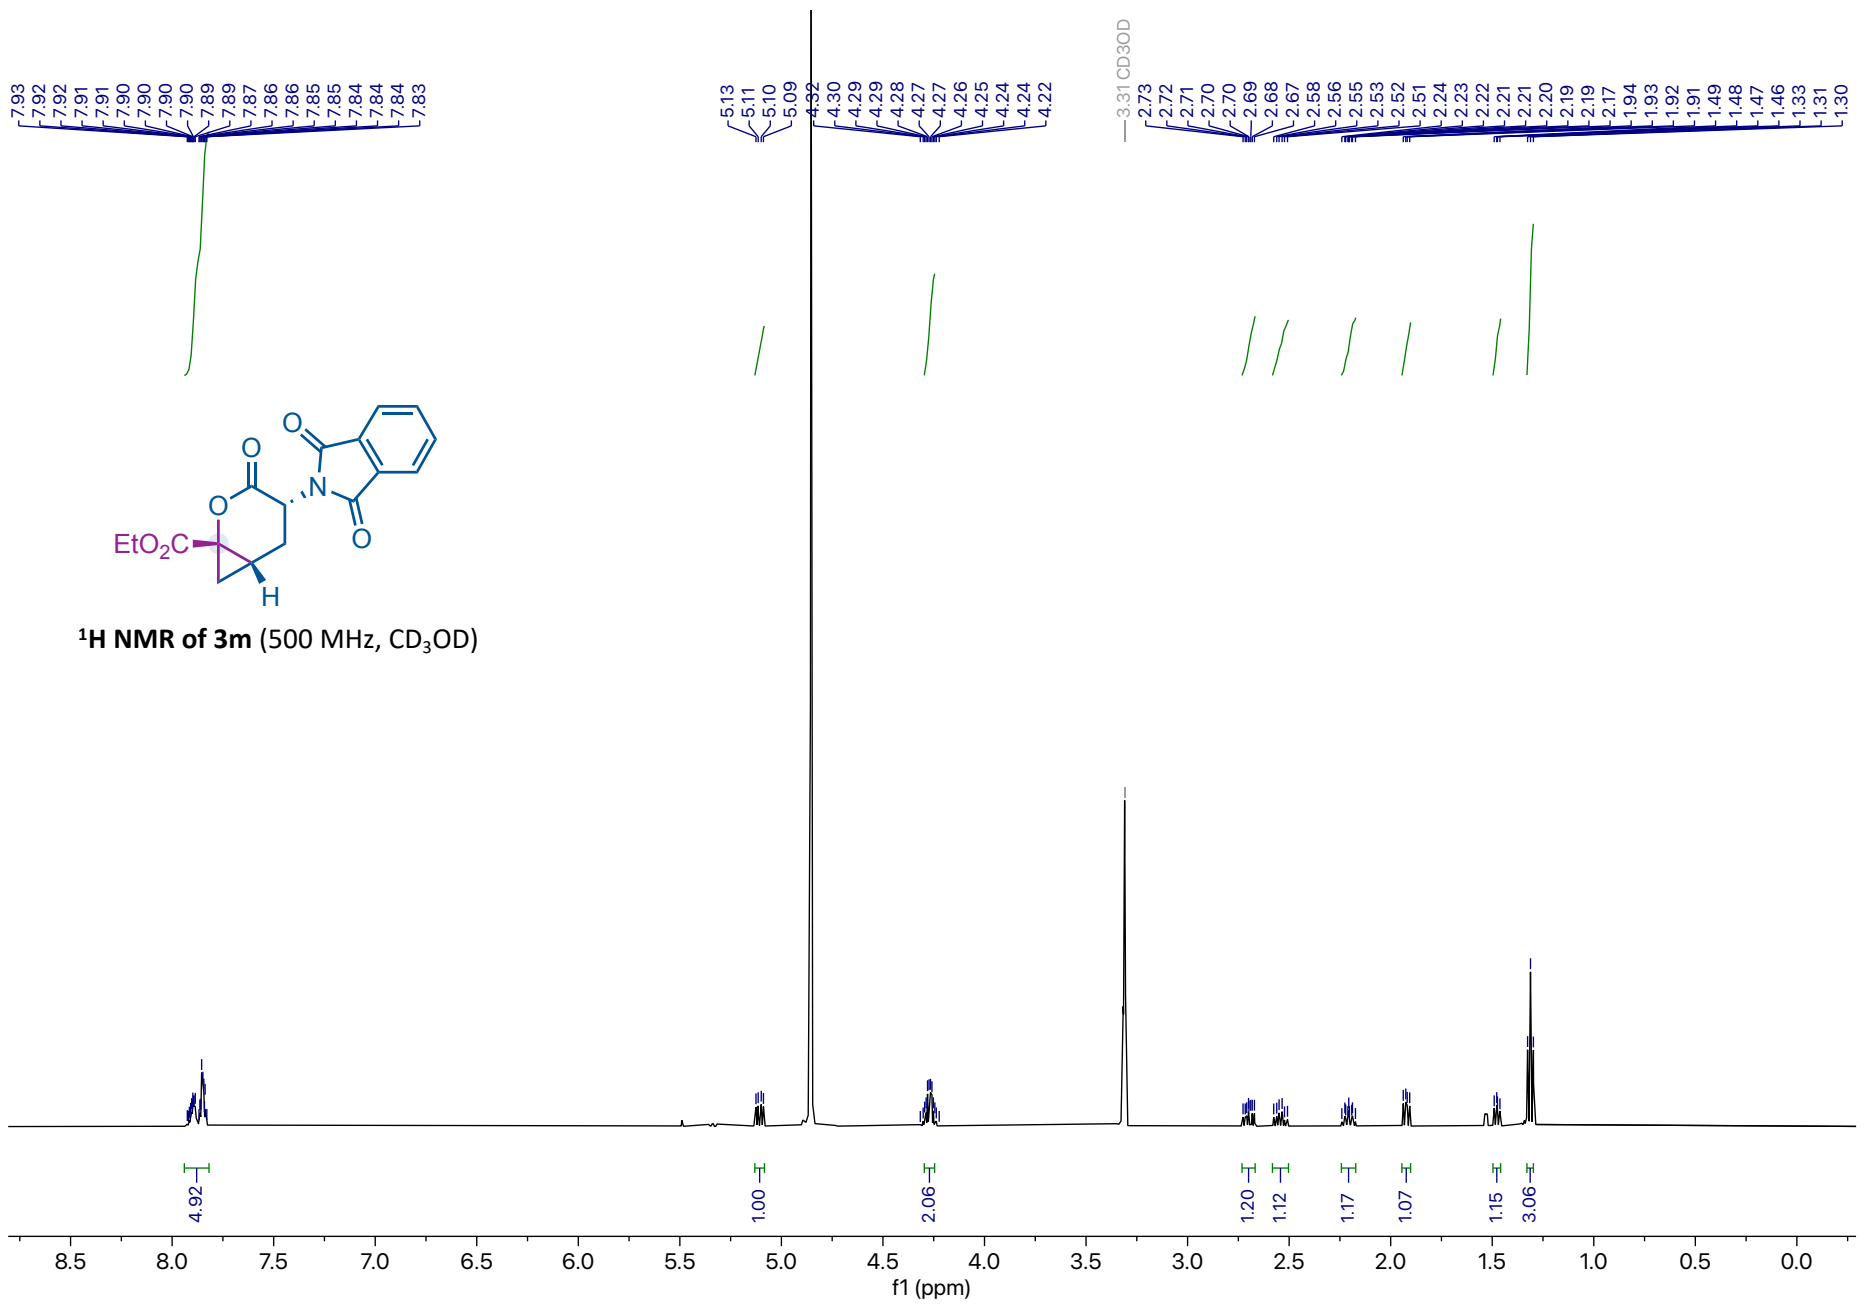

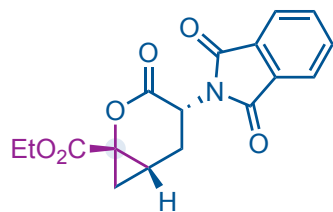

<sup>13</sup>C NMR of 3m (101 MHz, CDCl<sub>3</sub>)

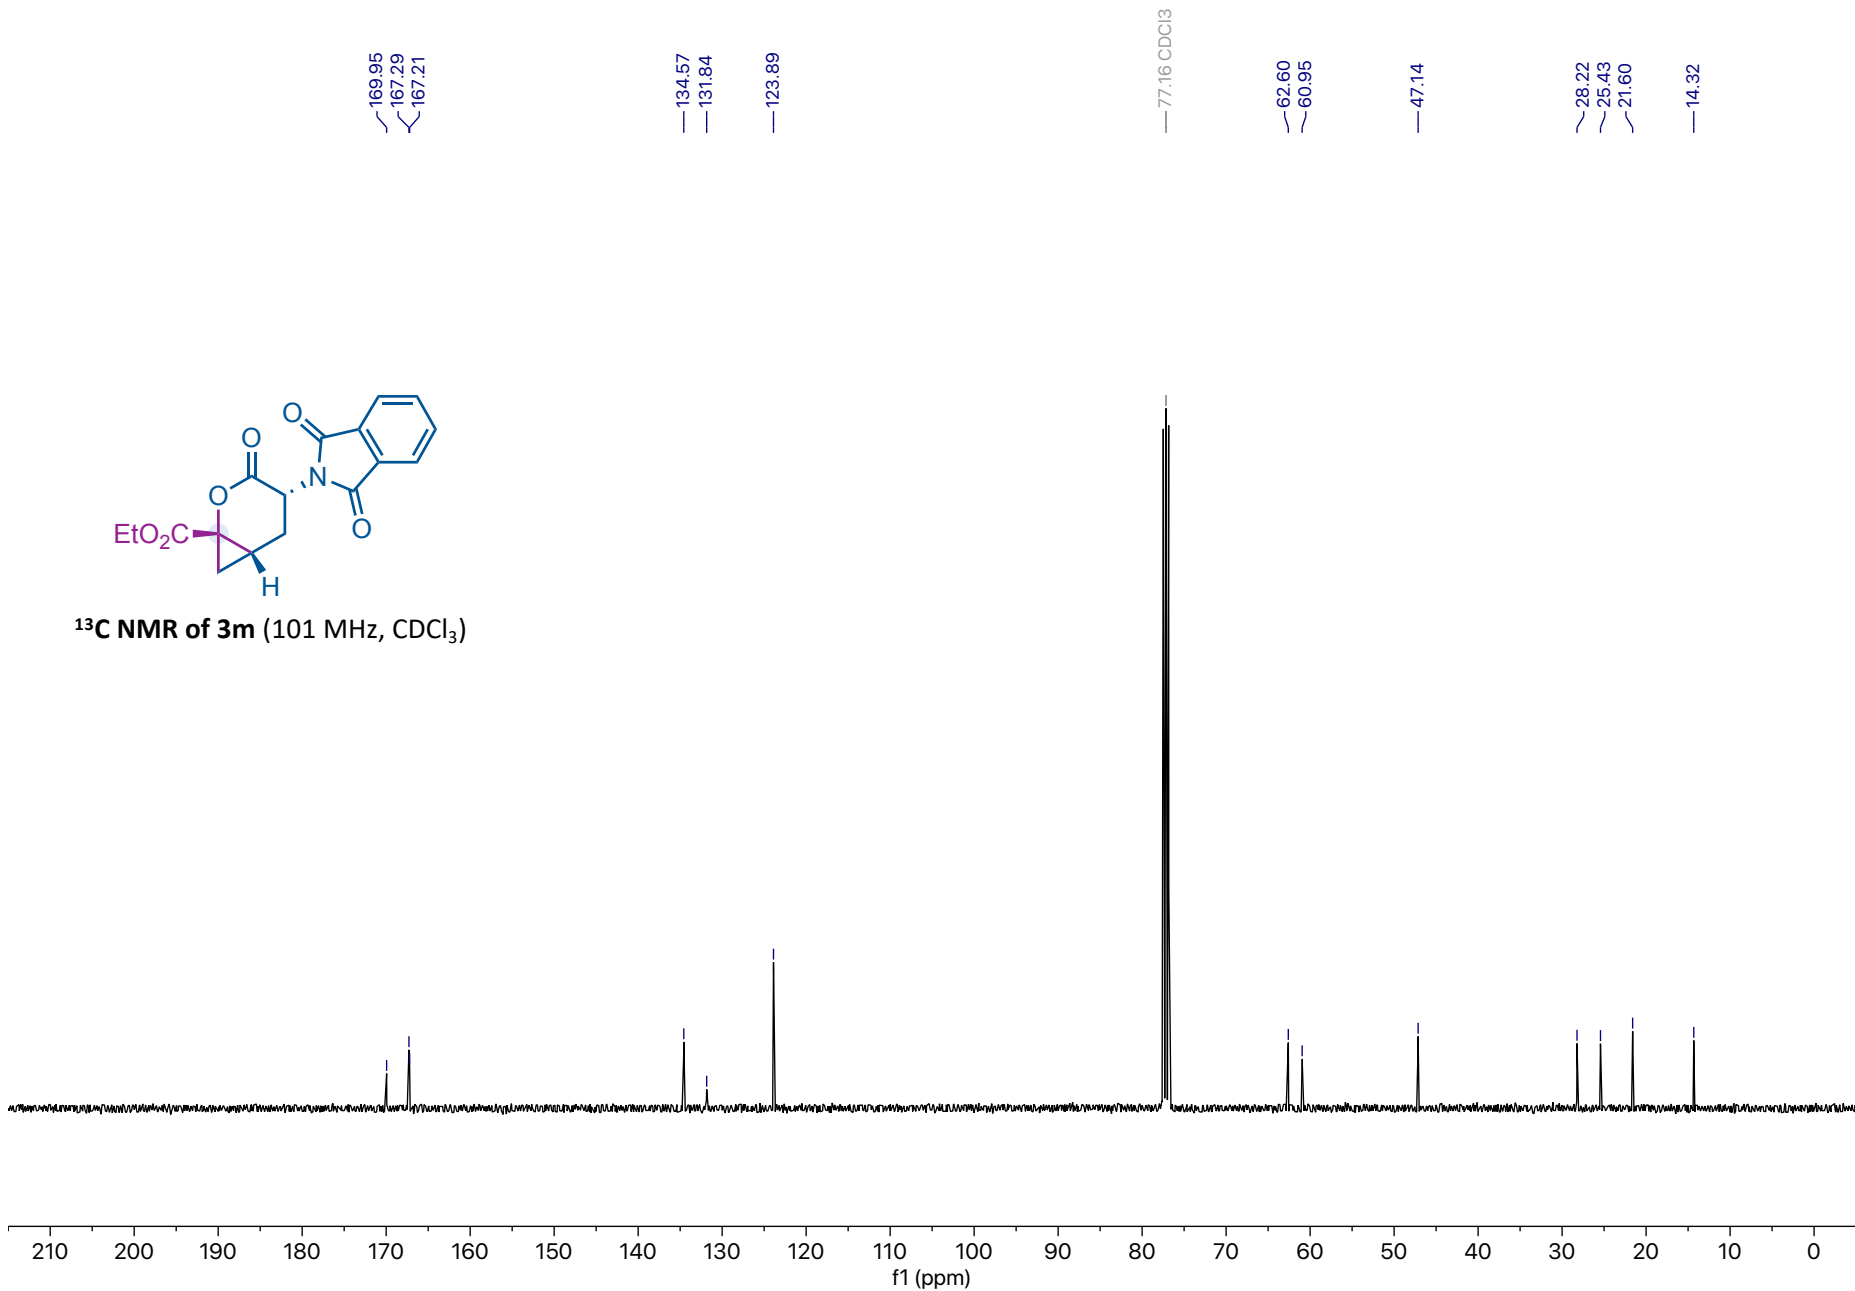

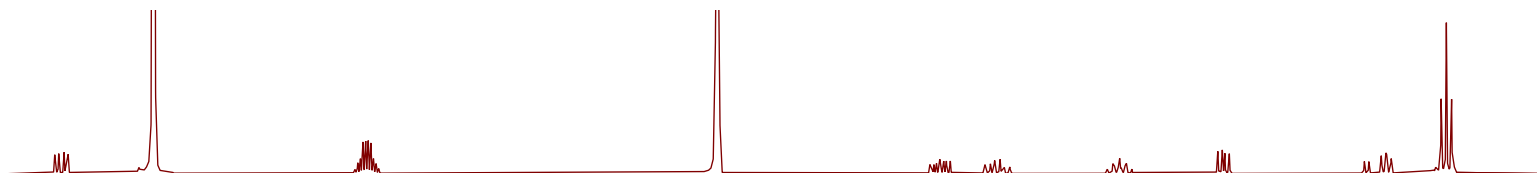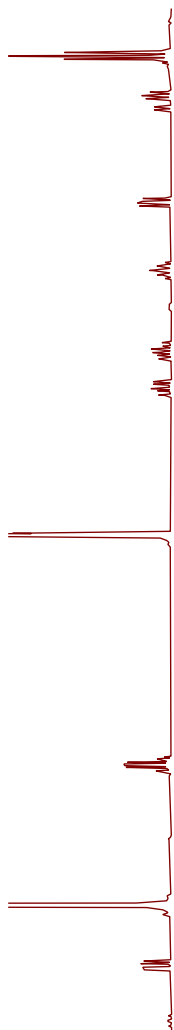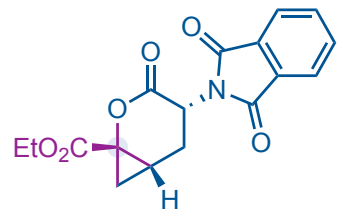

**<sup>1</sup>H – <sup>1</sup>H COSY90 of 3m**  
(CD<sub>3</sub>OD)

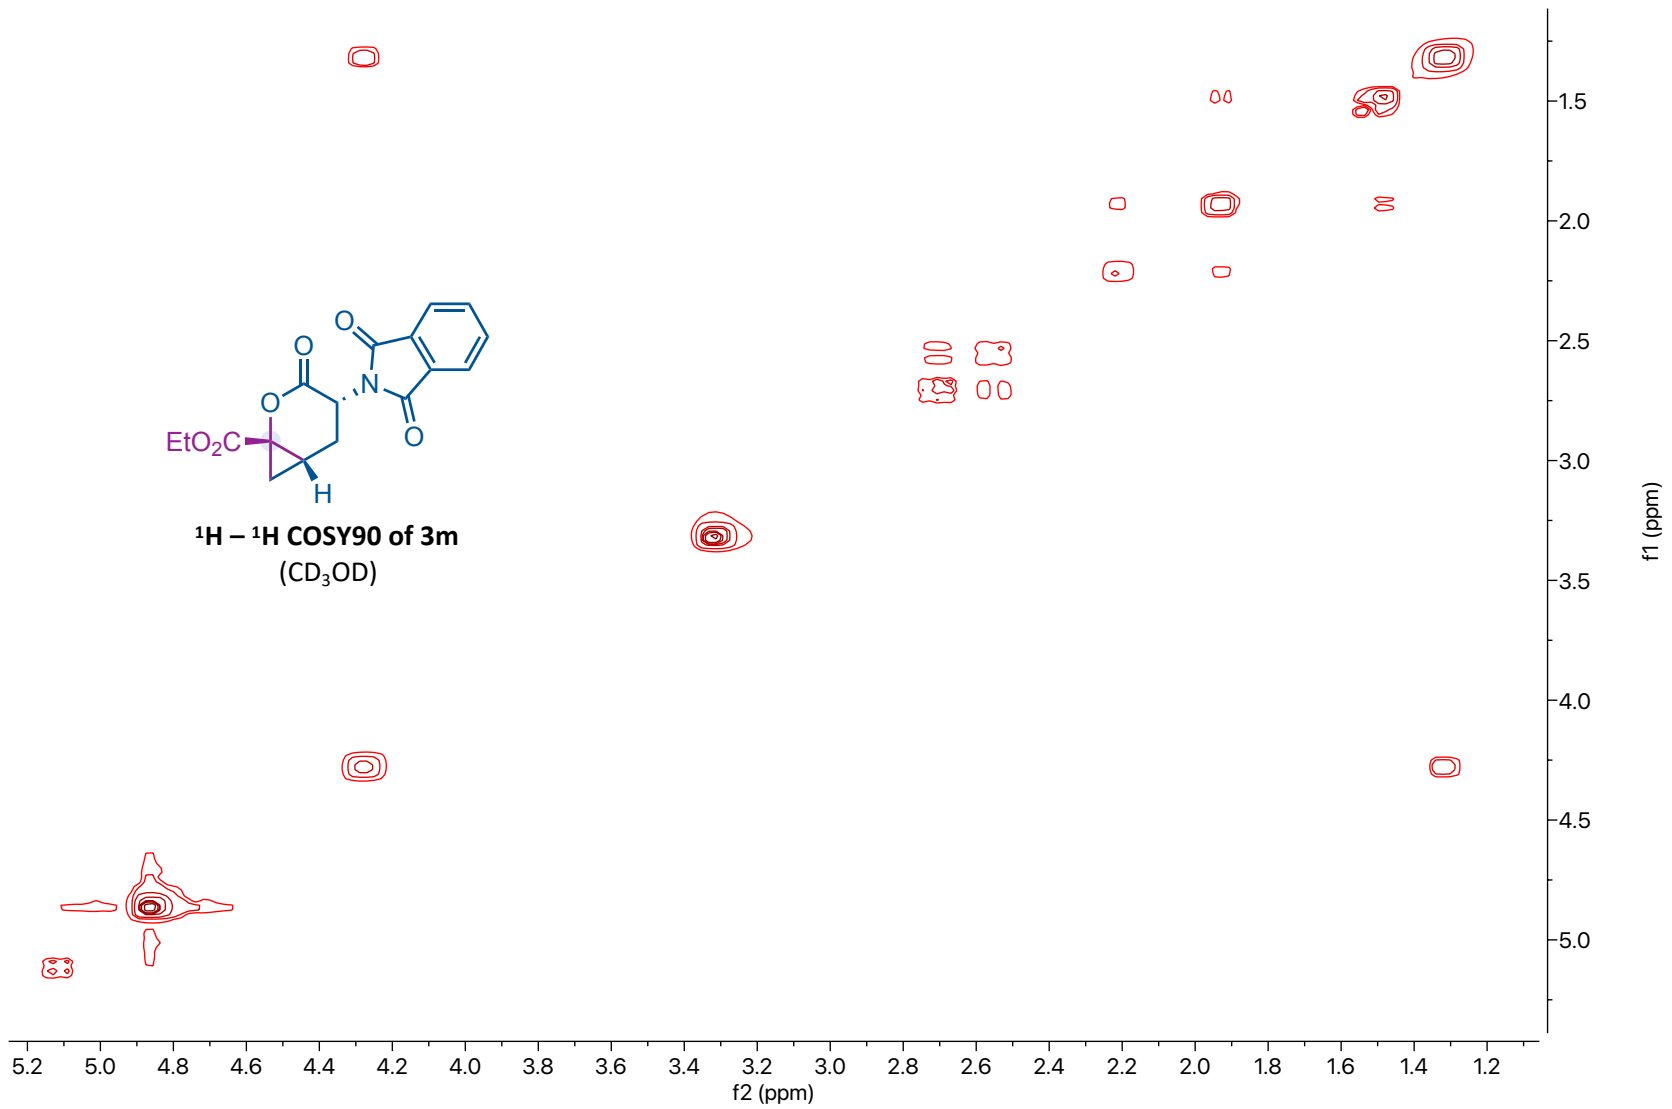

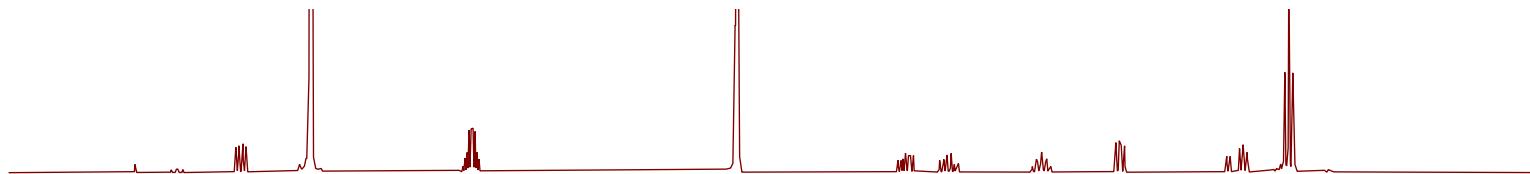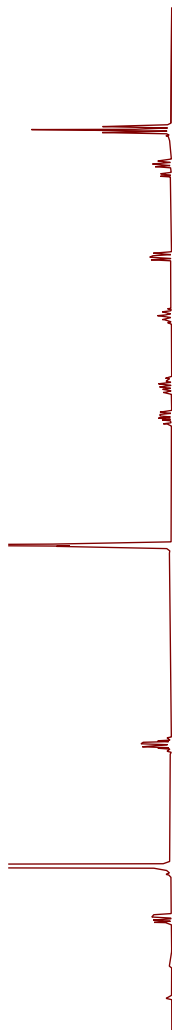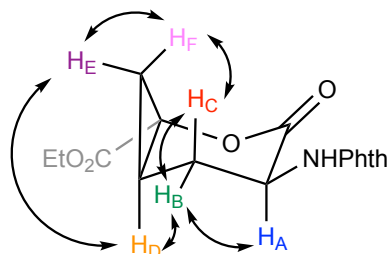

**<sup>1</sup>H - <sup>1</sup>H NOESY of 3m**  
(CD<sub>3</sub>OD)

{5.13,2.70}

{3.31,3.31}CD3OD

{2.55,1.47}

{2.22,1.90}

{2.71,2.22}

{1.90,2.22}

{2.72,2.53}

{2.53,2.72}

{2.21,2.70}

{1.48,2.55}

{2.70,5.13}

f1 (ppm)

f2 (ppm)

S202

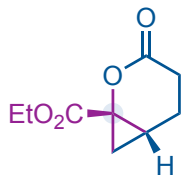

<sup>1</sup>H NMR of **3n** (400 MHz, CDCl<sub>3</sub>)

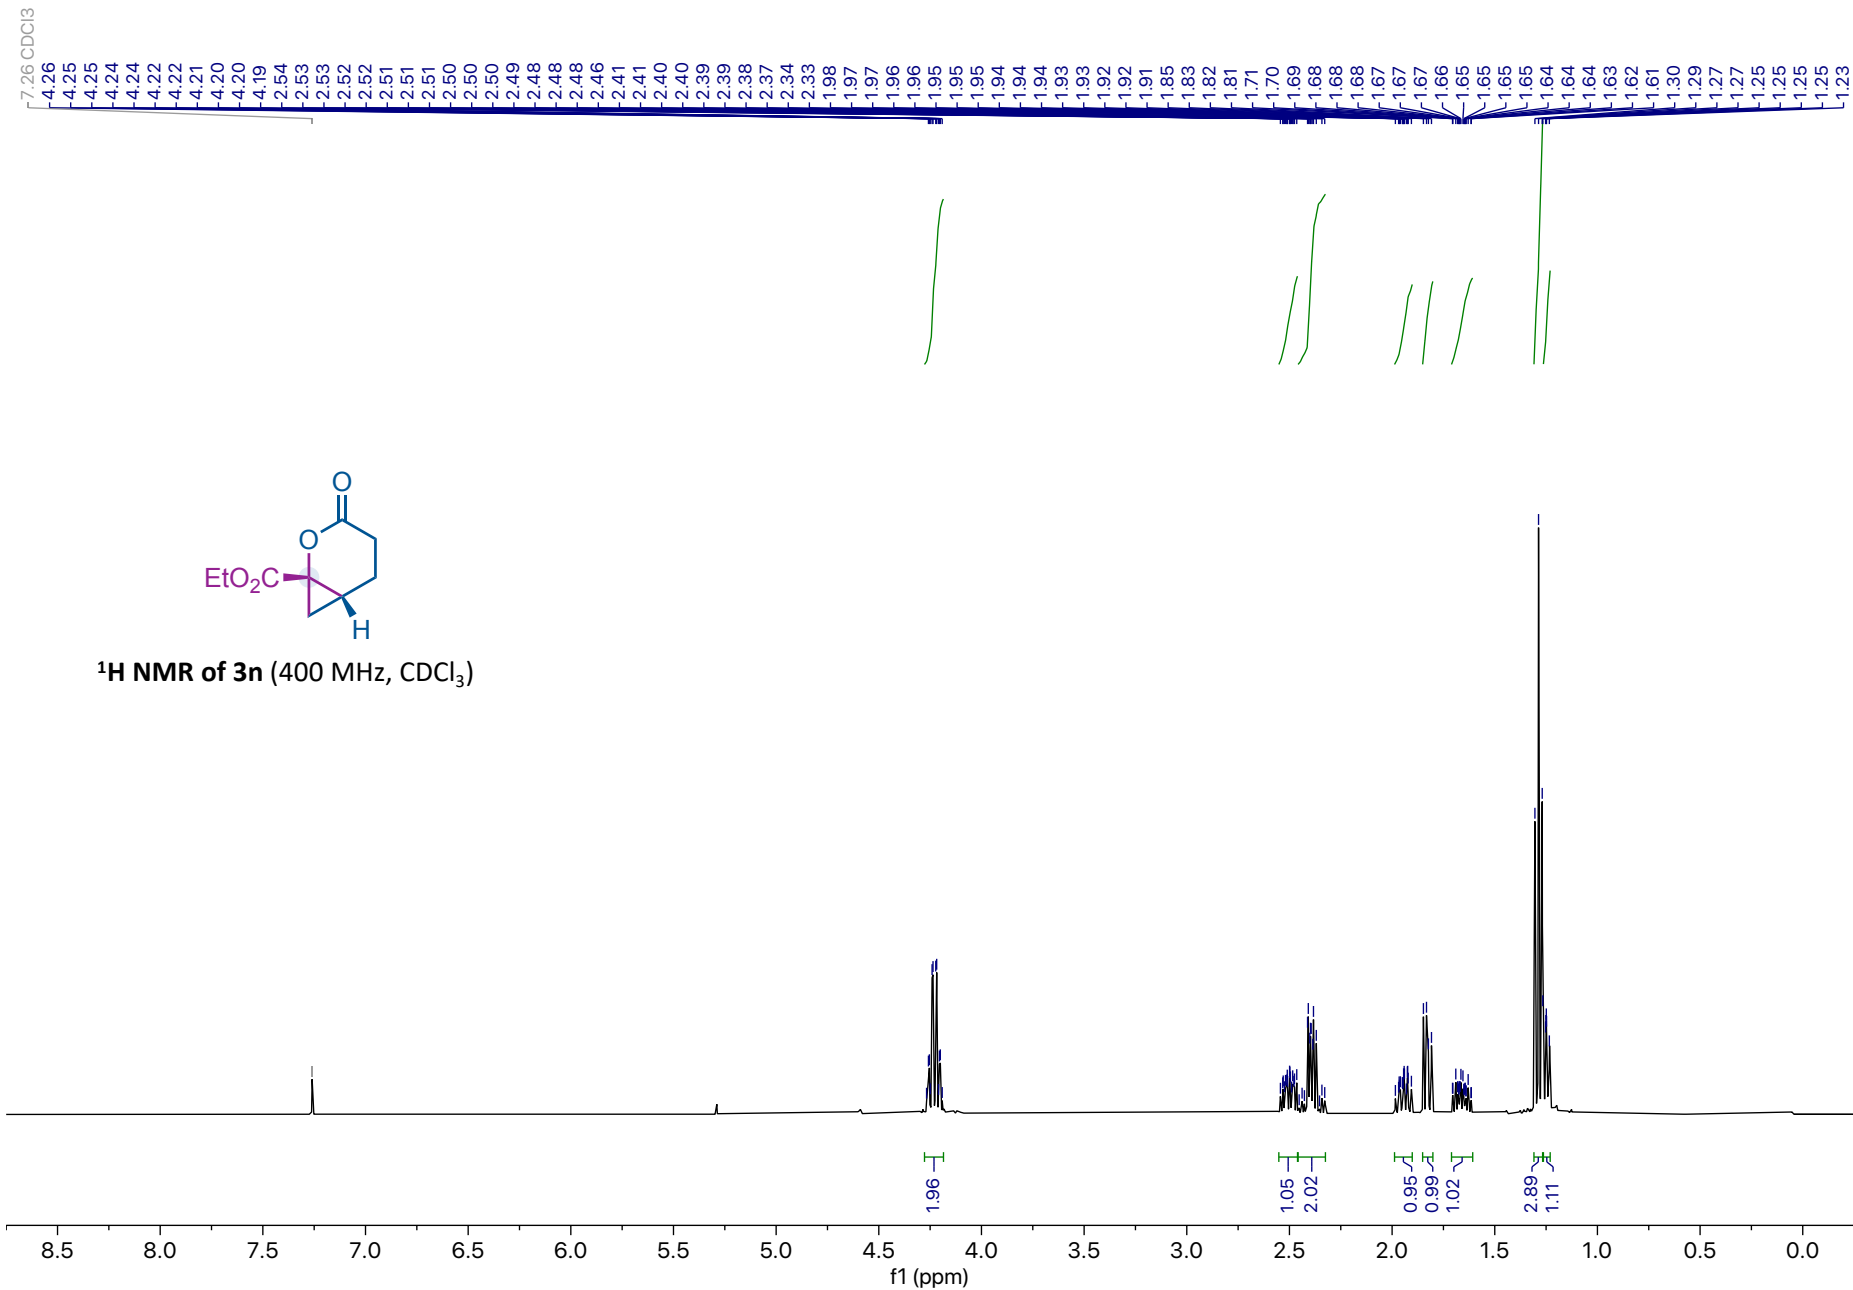

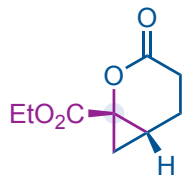

<sup>13</sup>C NMR of 3n (101 MHz, CDCl<sub>3</sub>)

170.59  
170.55

77.16 CDCl<sub>3</sub>

62.15  
61.91

28.54  
23.79  
22.57  
21.38

14.29

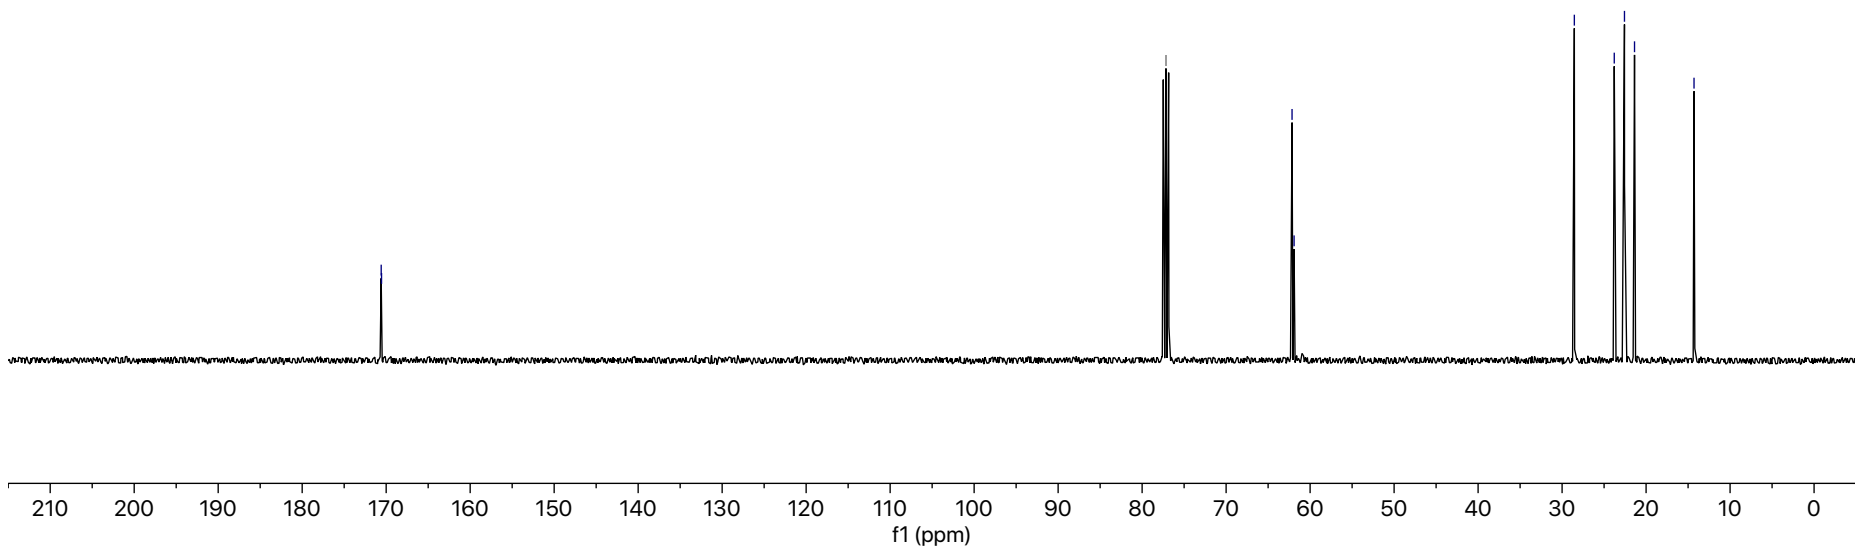

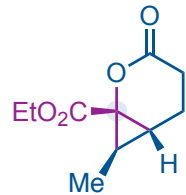

<sup>1</sup>H NMR of **3o** (400 MHz, CDCl<sub>3</sub>)

—7.26 CDCl<sub>3</sub>

4.29  
4.28  
4.27  
4.26  
4.25  
4.25  
4.24  
4.23  
4.22  
4.21  
2.53  
2.52  
2.51  
2.51  
2.50  
2.49  
2.48  
2.48  
2.47  
2.47  
2.46  
2.45  
2.43  
2.42  
2.41  
2.39  
2.38  
2.37  
2.36  
2.35  
2.33  
2.32  
2.30  
2.29  
2.28  
1.89  
1.87  
1.87  
1.85  
1.85  
1.83  
1.68  
1.67  
1.66  
1.66  
1.65  
1.64  
1.58  
1.57  
1.57  
1.55  
1.55  
1.30  
1.29  
1.27  
1.26

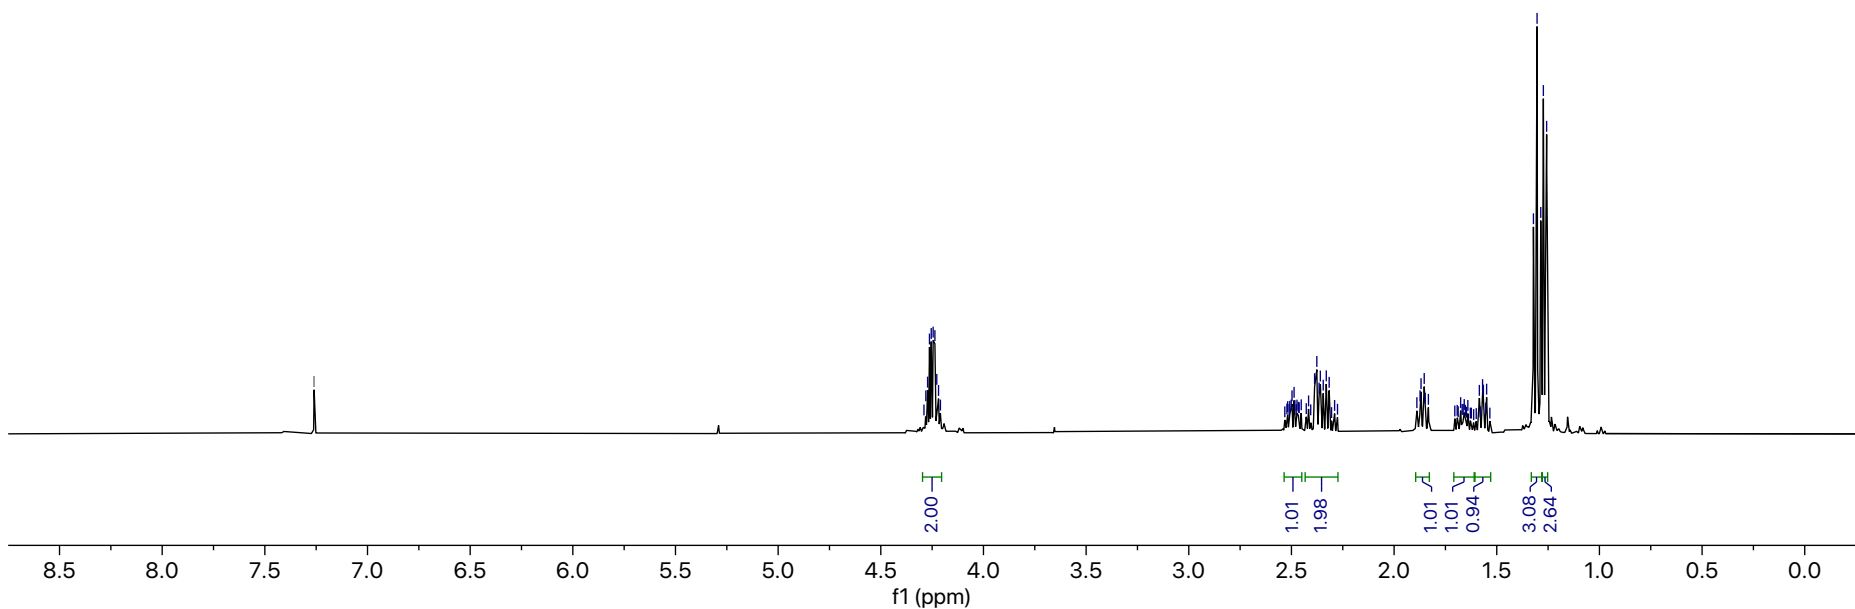

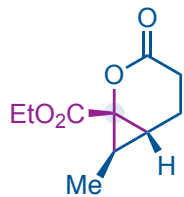

<sup>13</sup>C NMR of 3o (101 MHz, CDCl<sub>3</sub>)

170.85  
169.23

77.16 CDCl<sub>3</sub>

65.73  
61.90

33.40  
28.88  
27.56  
22.82

14.37  
11.86

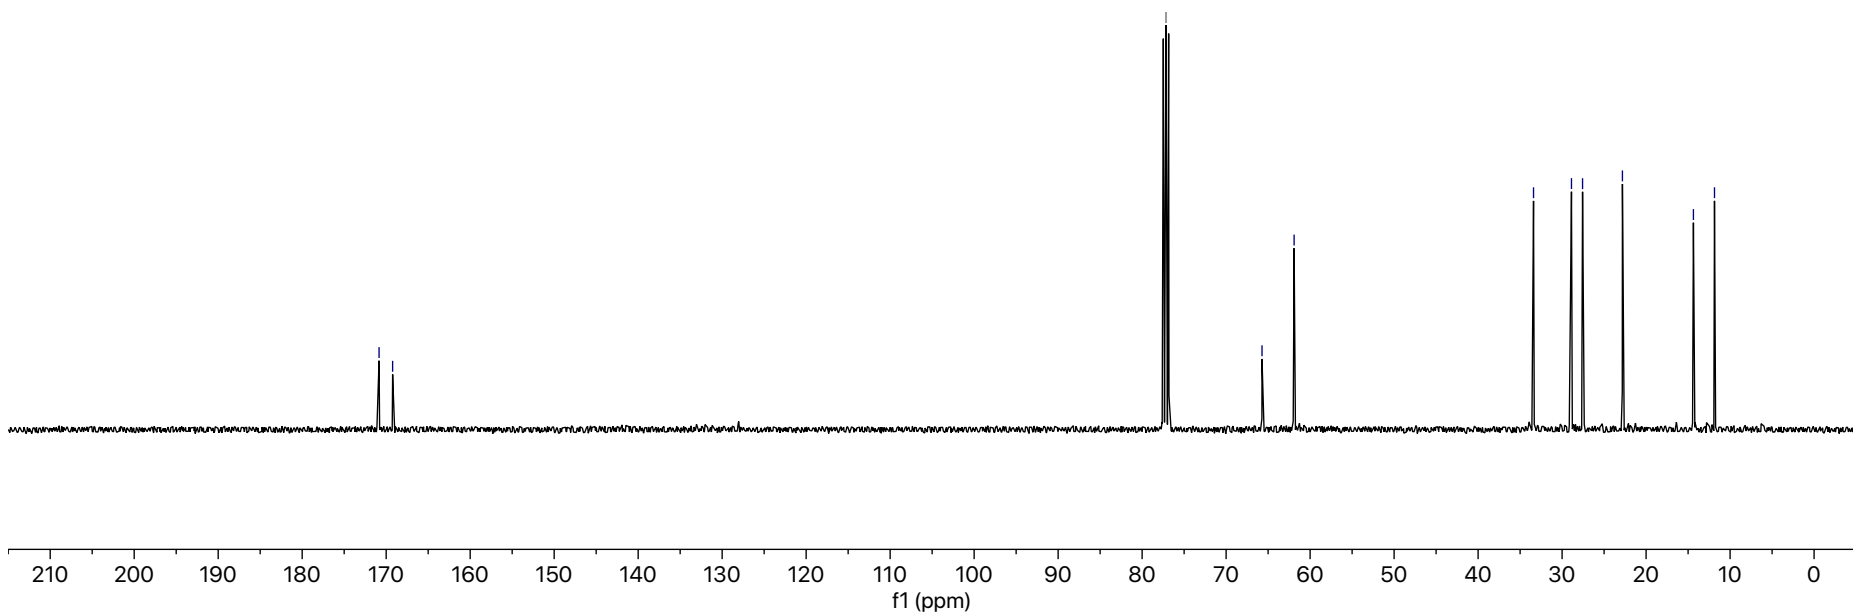



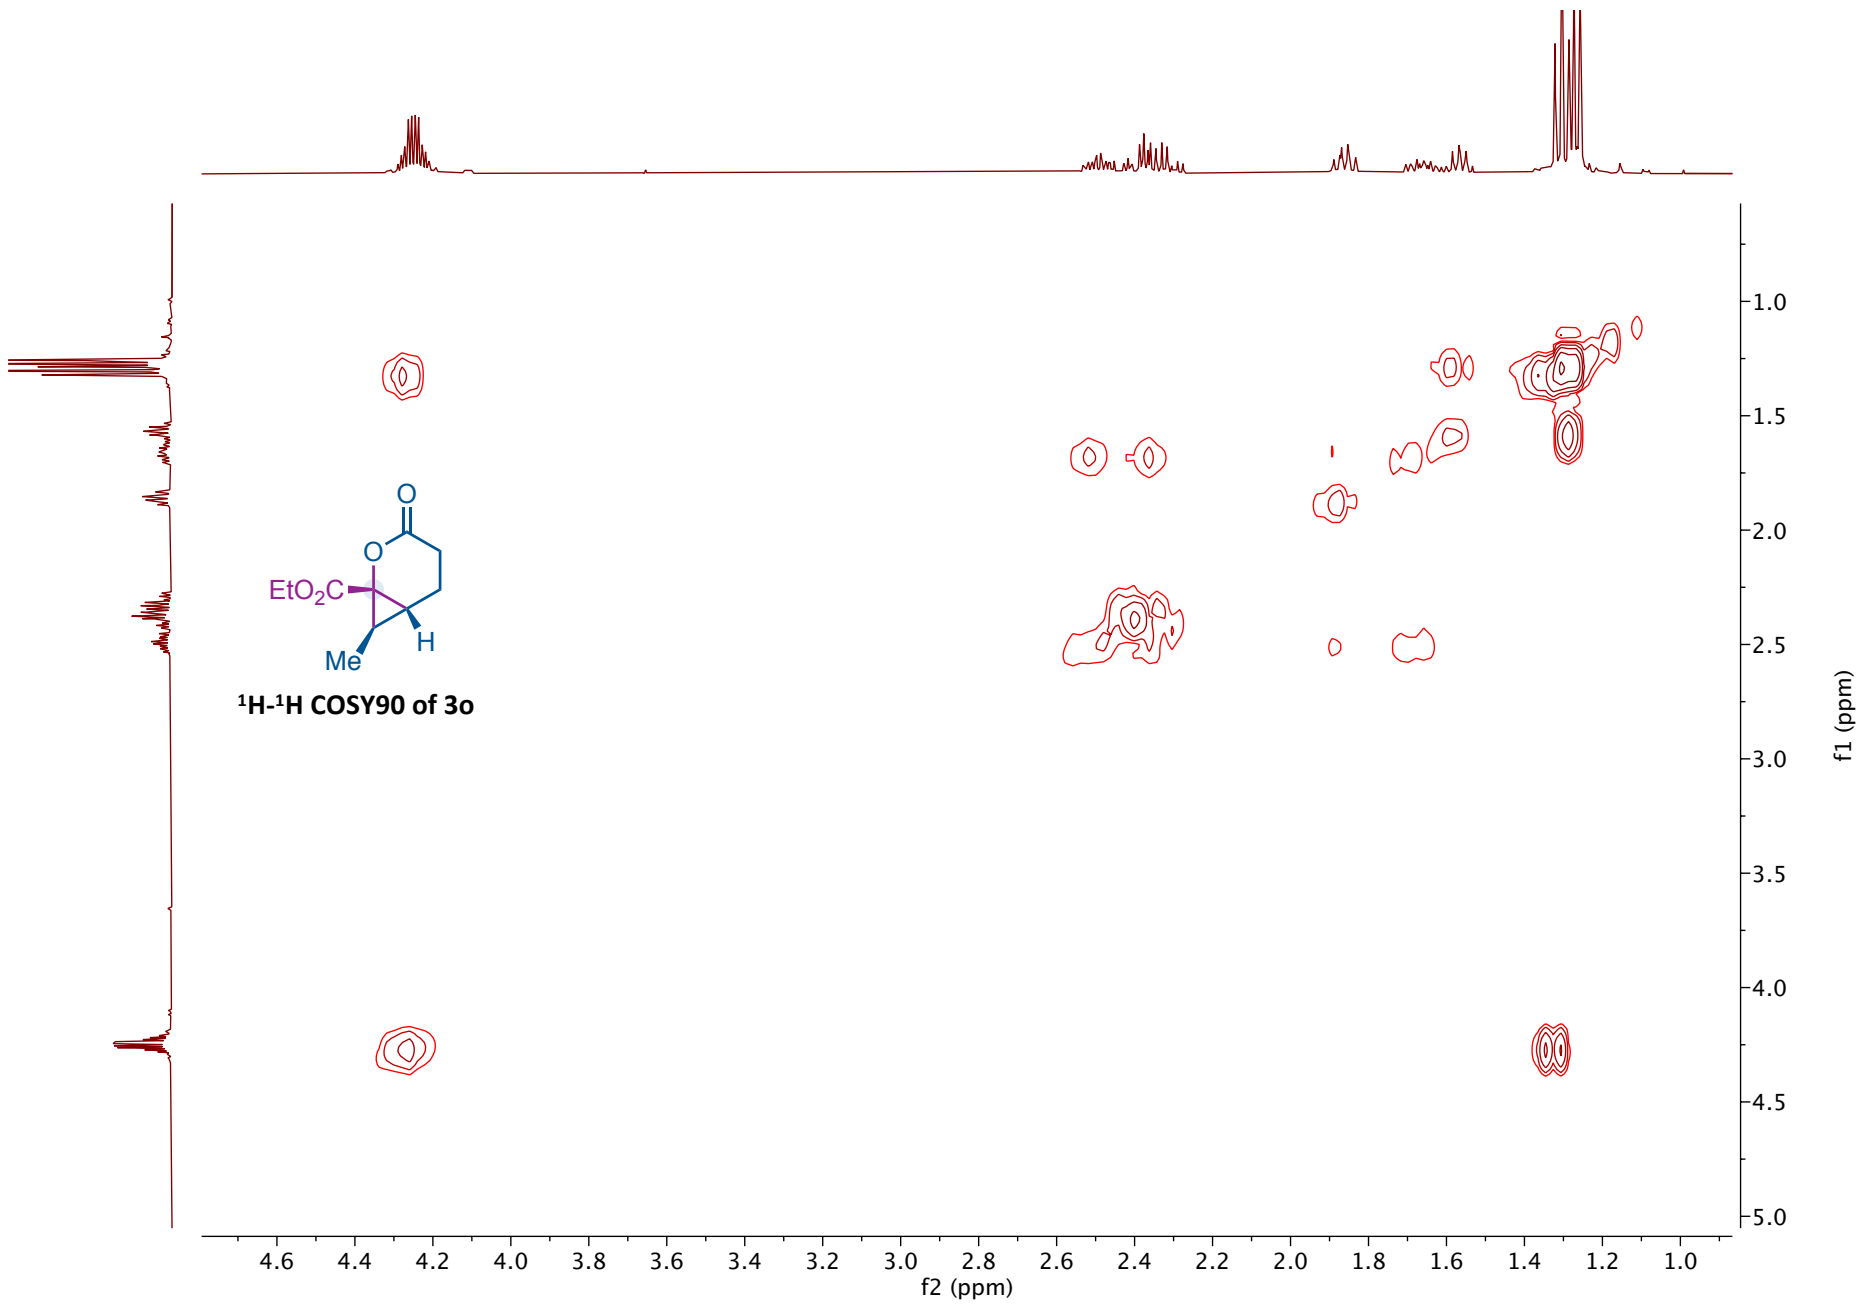

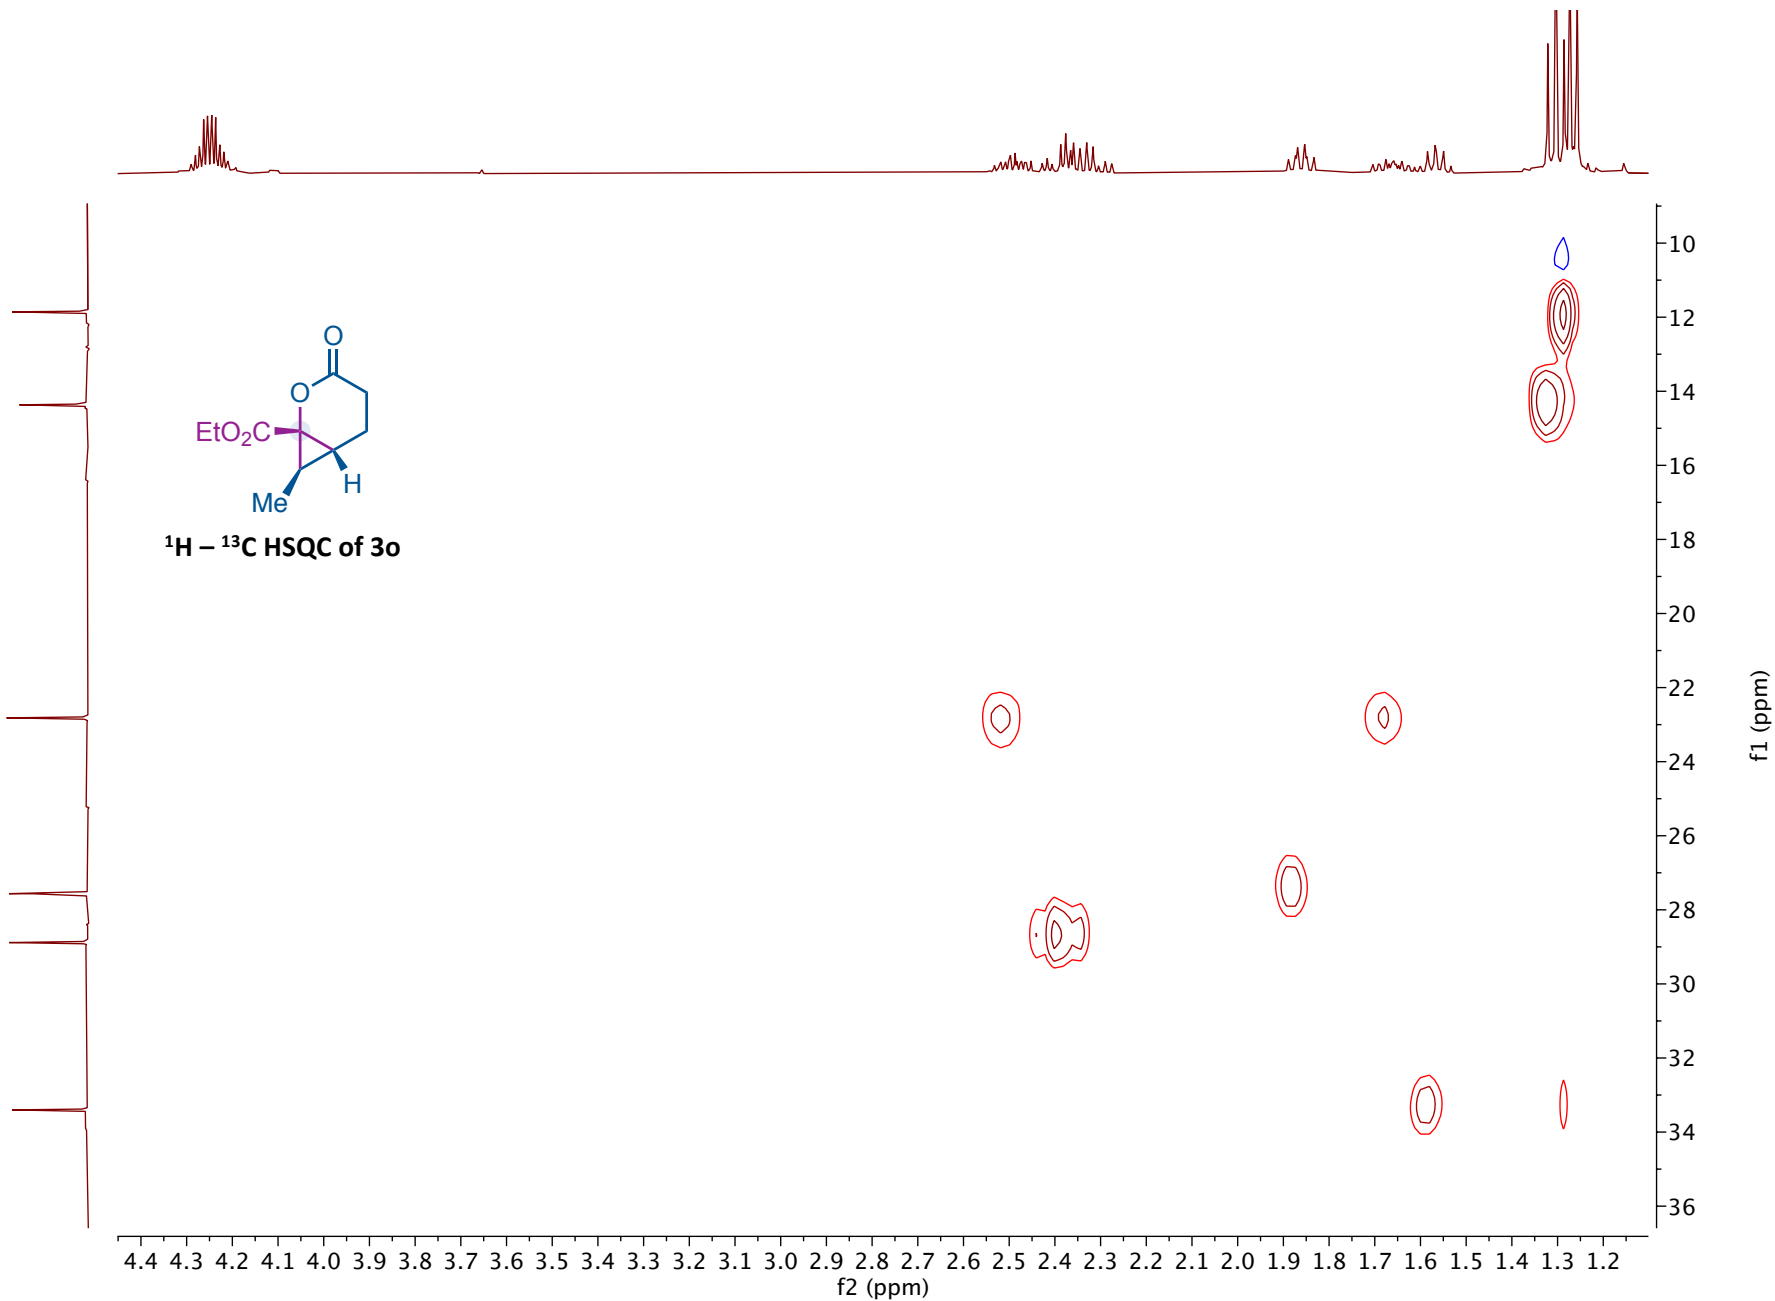

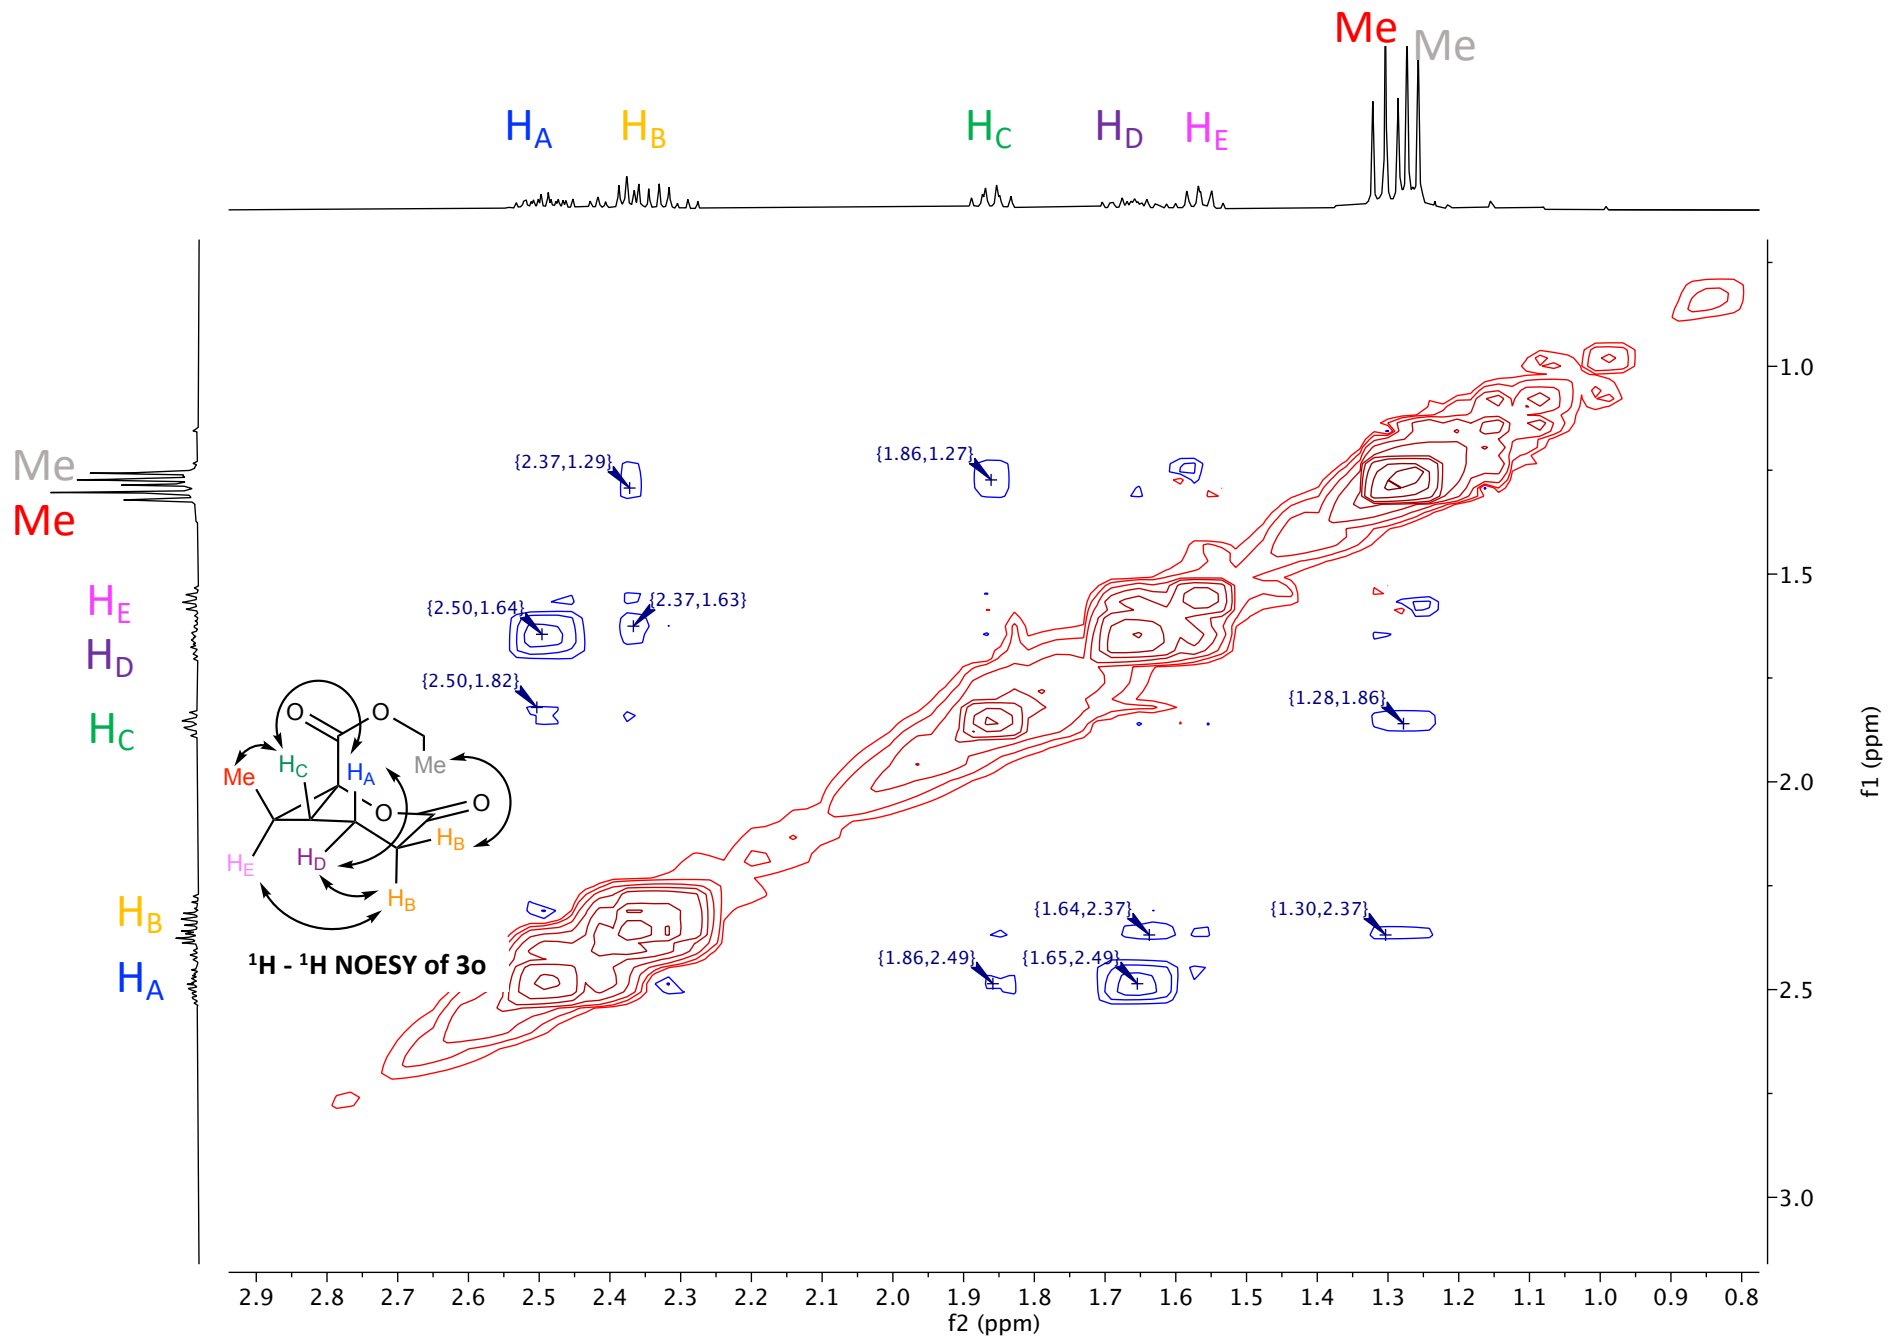

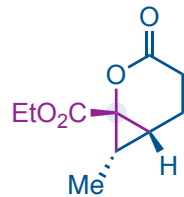

<sup>1</sup>H NMR of 3p (400 MHz, CDCl<sub>3</sub>)

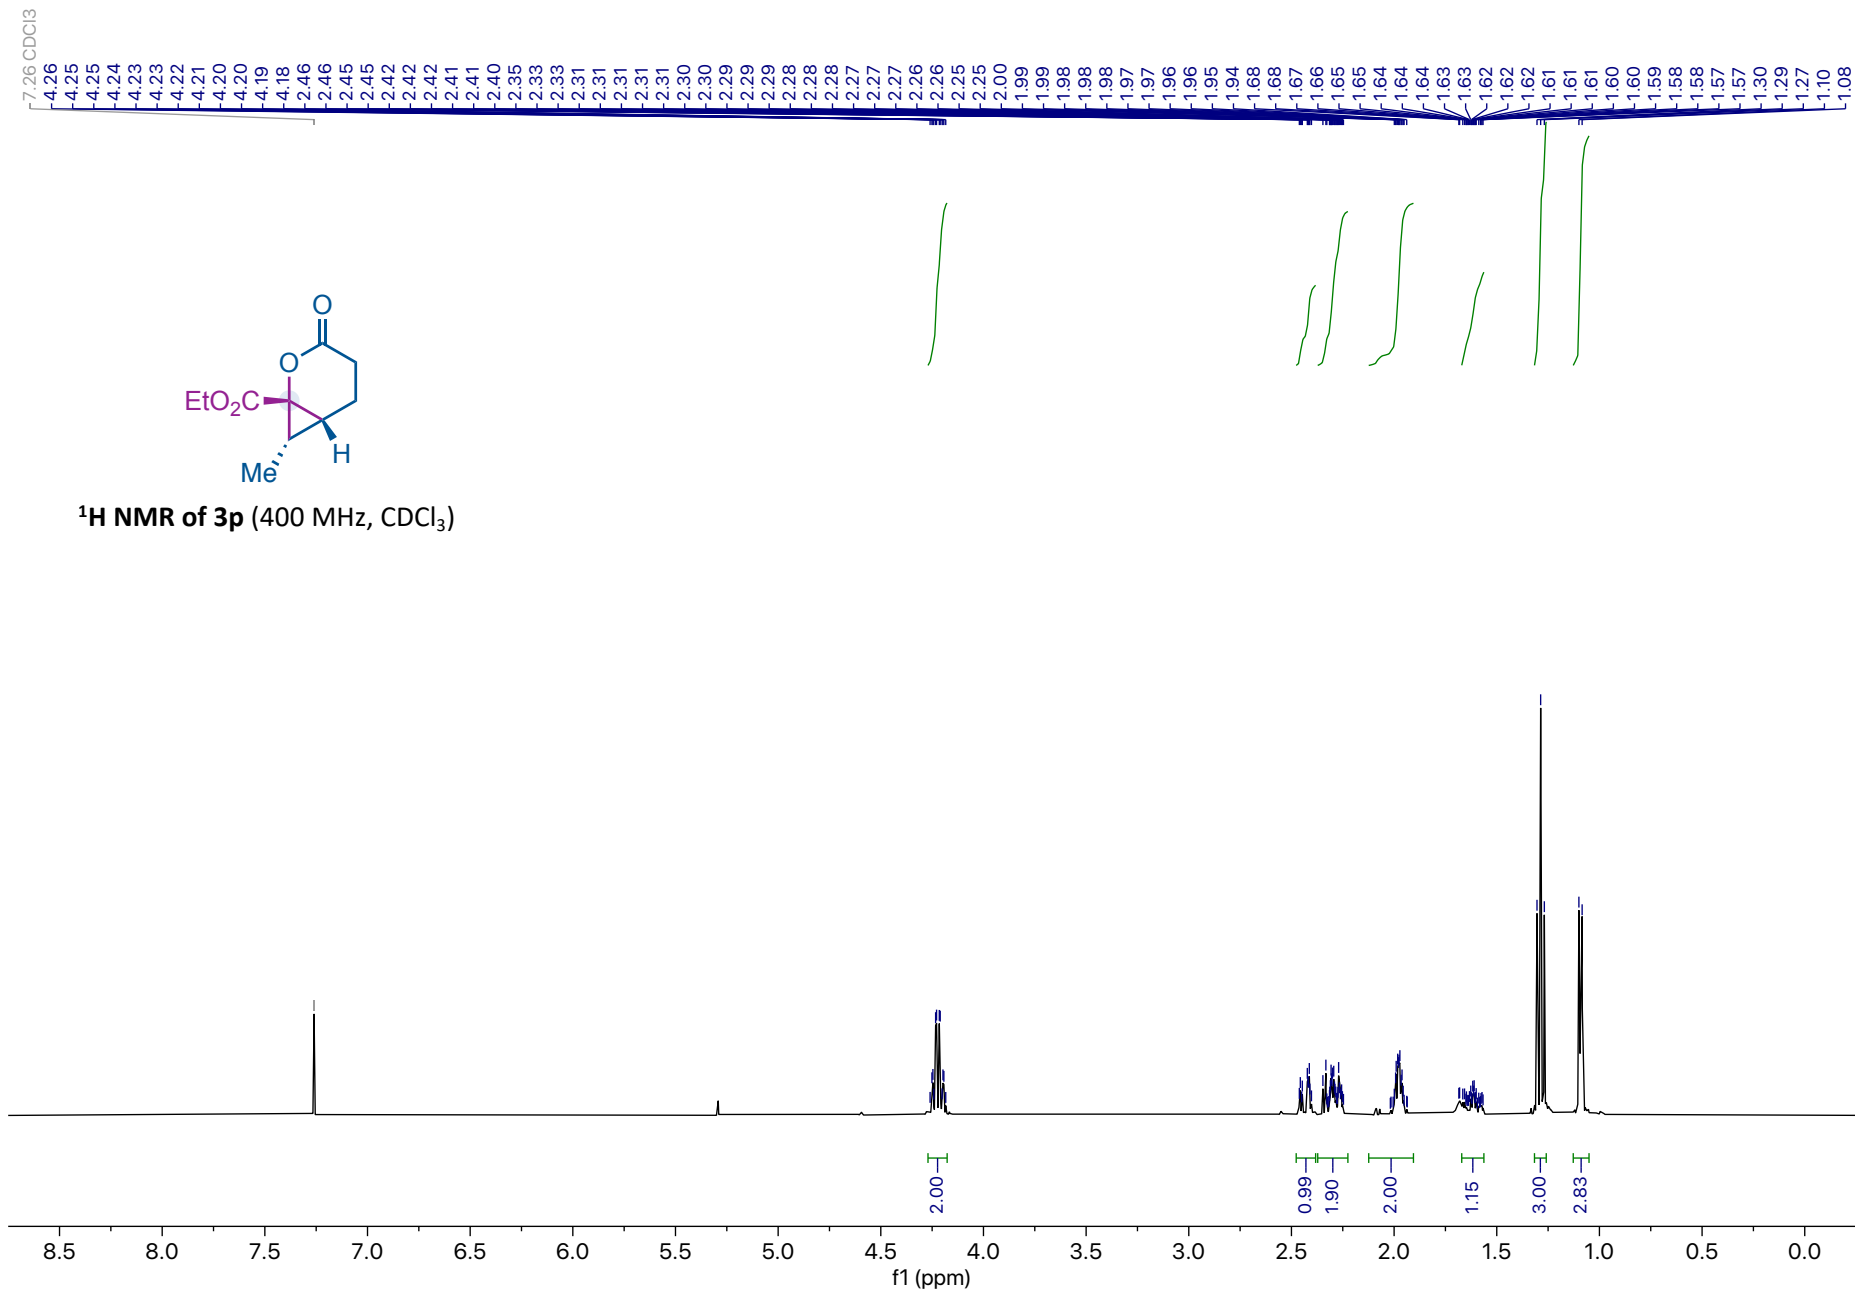

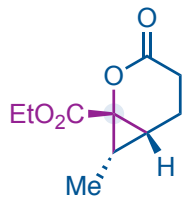

<sup>13</sup>C NMR of 3p (101 MHz, CDCl<sub>3</sub>)

171.76  
171.25

77.16 CDCl<sub>3</sub>

63.54  
62.03

28.87  
25.23  
23.86

16.40  
14.32

6.31

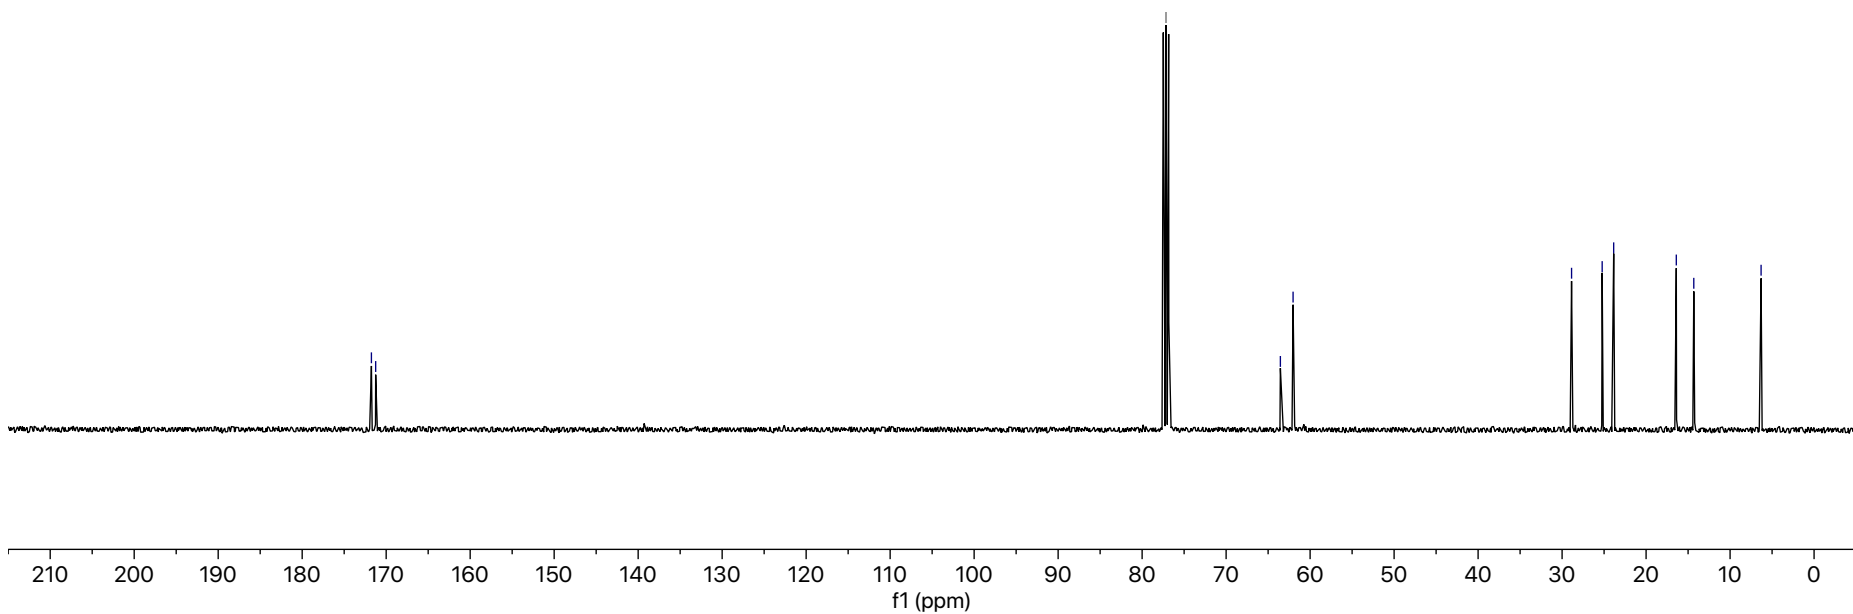

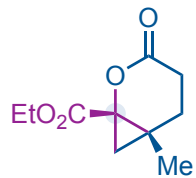

<sup>1</sup>H NMR of 3q (400 MHz, CDCl<sub>3</sub>)

—7.26 CDCl<sub>3</sub>

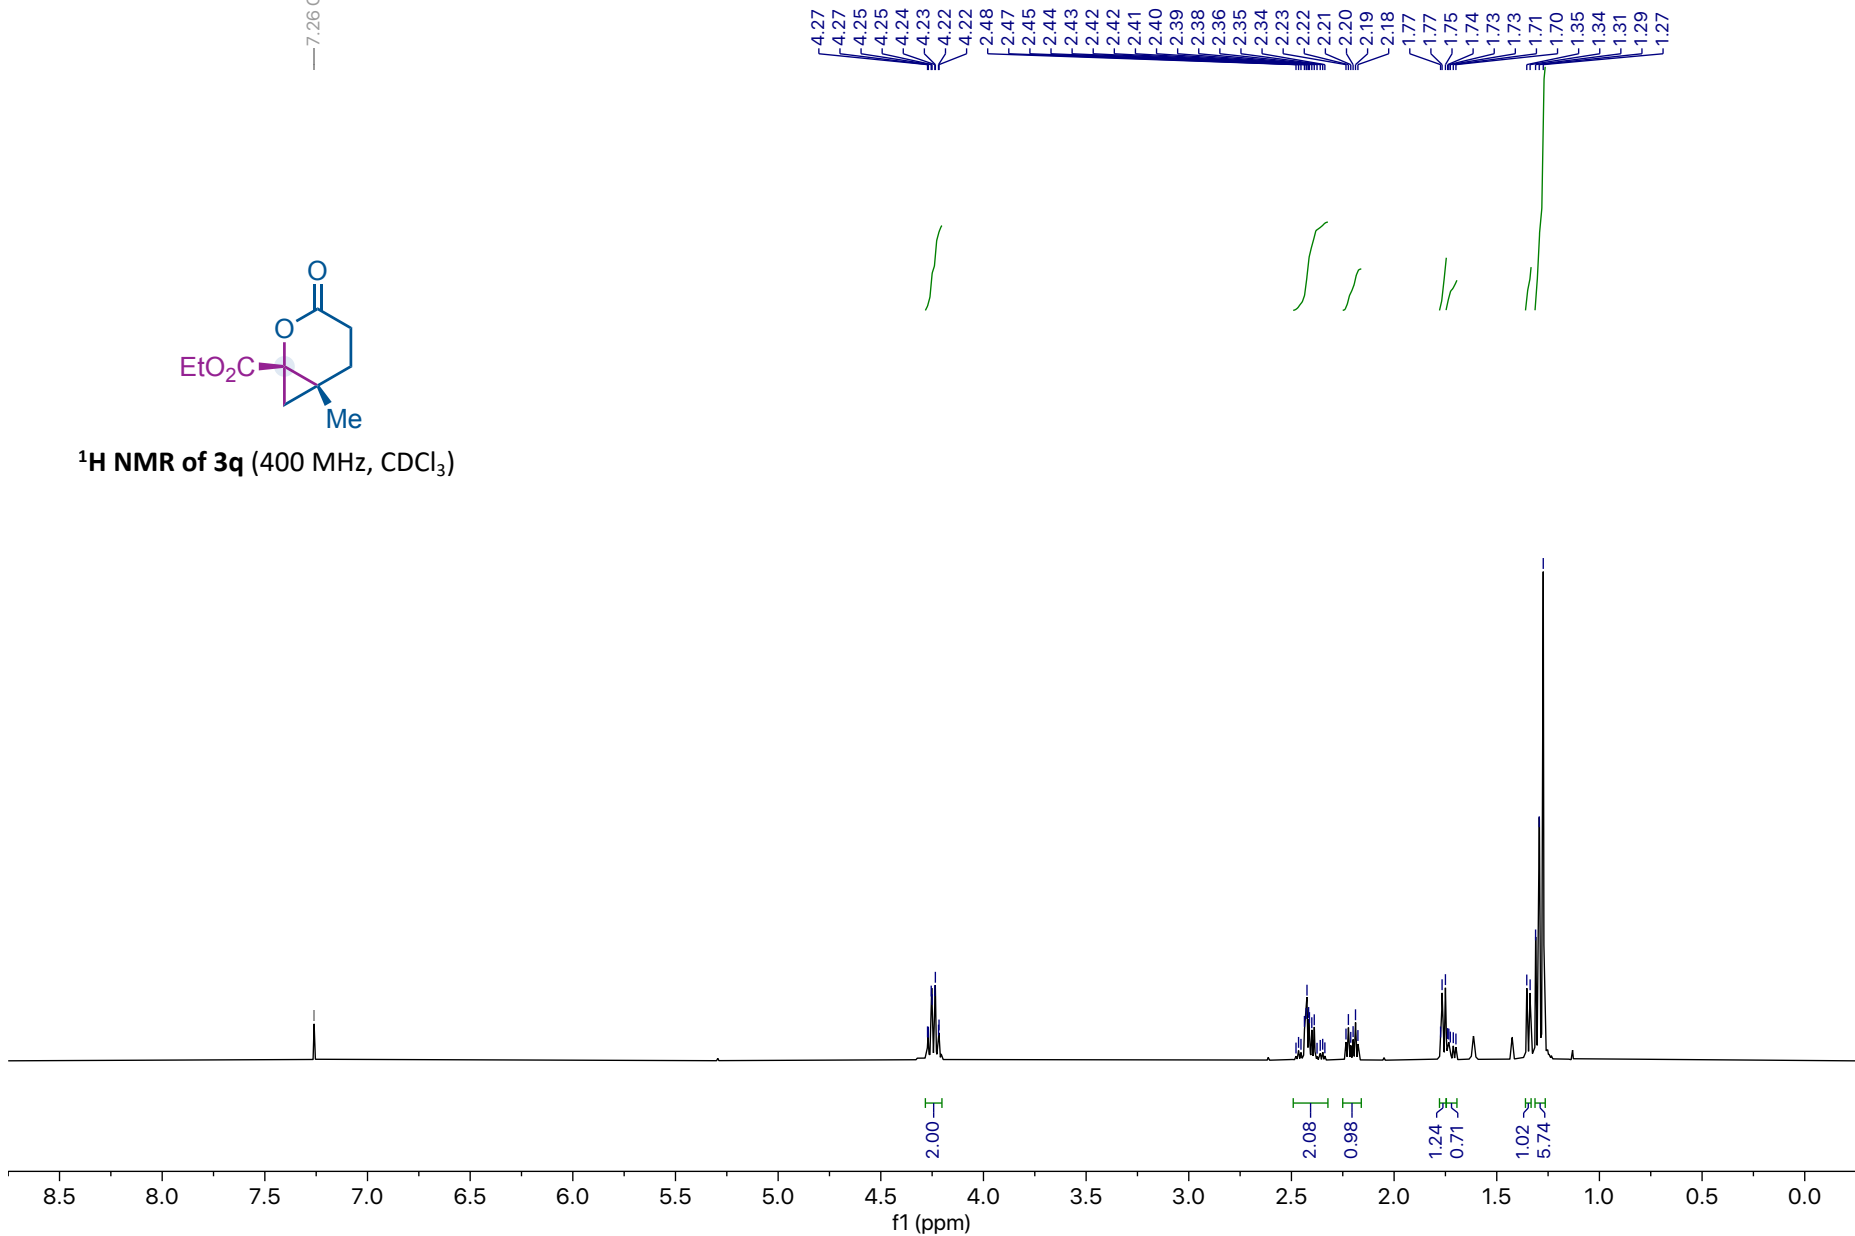

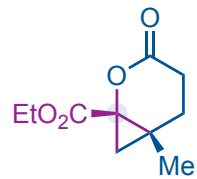

<sup>13</sup>C NMR of 3q (101 MHz, CDCl<sub>3</sub>)

— 171.81  
— 168.74

— 77.16 CDCl<sub>3</sub>

— 66.70  
— 62.06

— 30.85  
— 28.33  
— 27.98  
— 26.54

— 18.26  
— 14.41

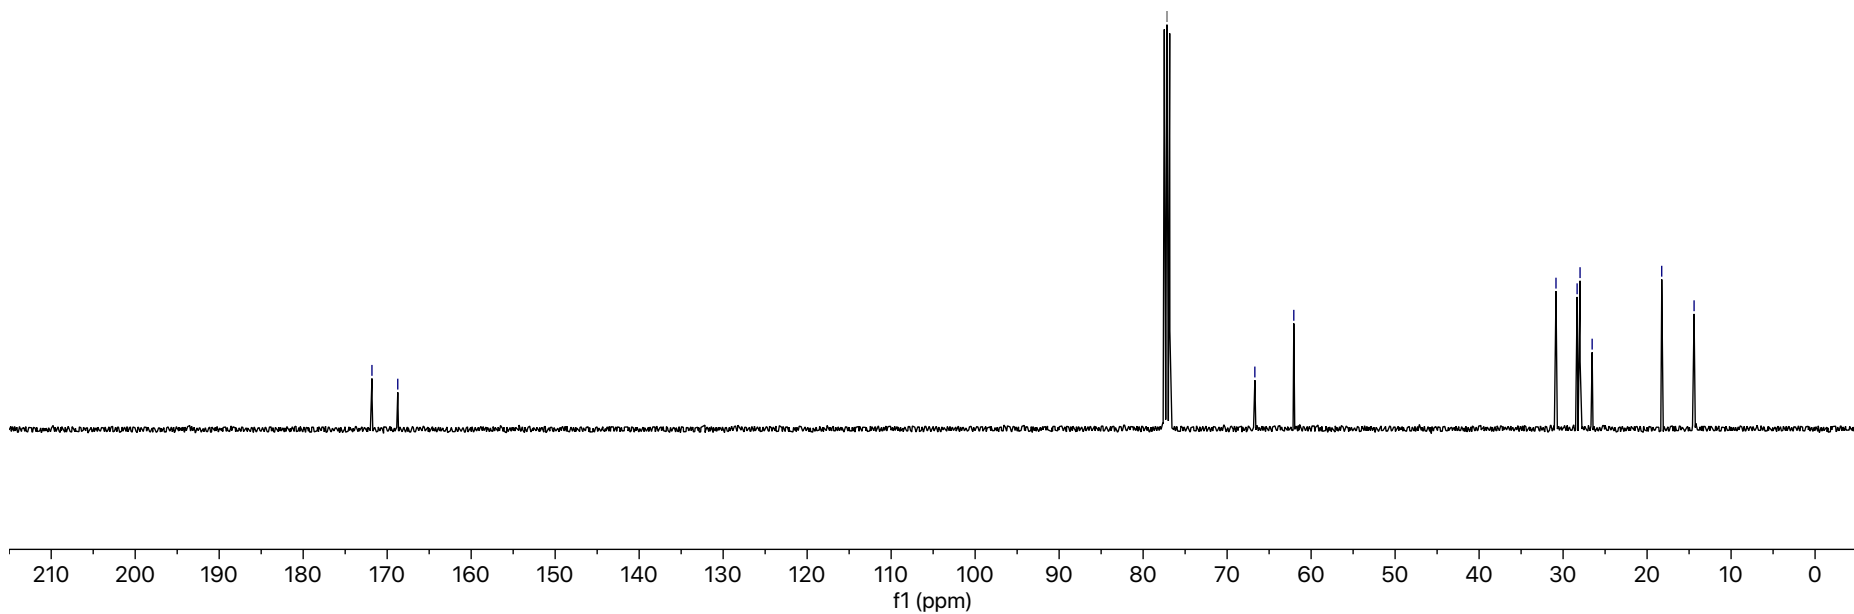

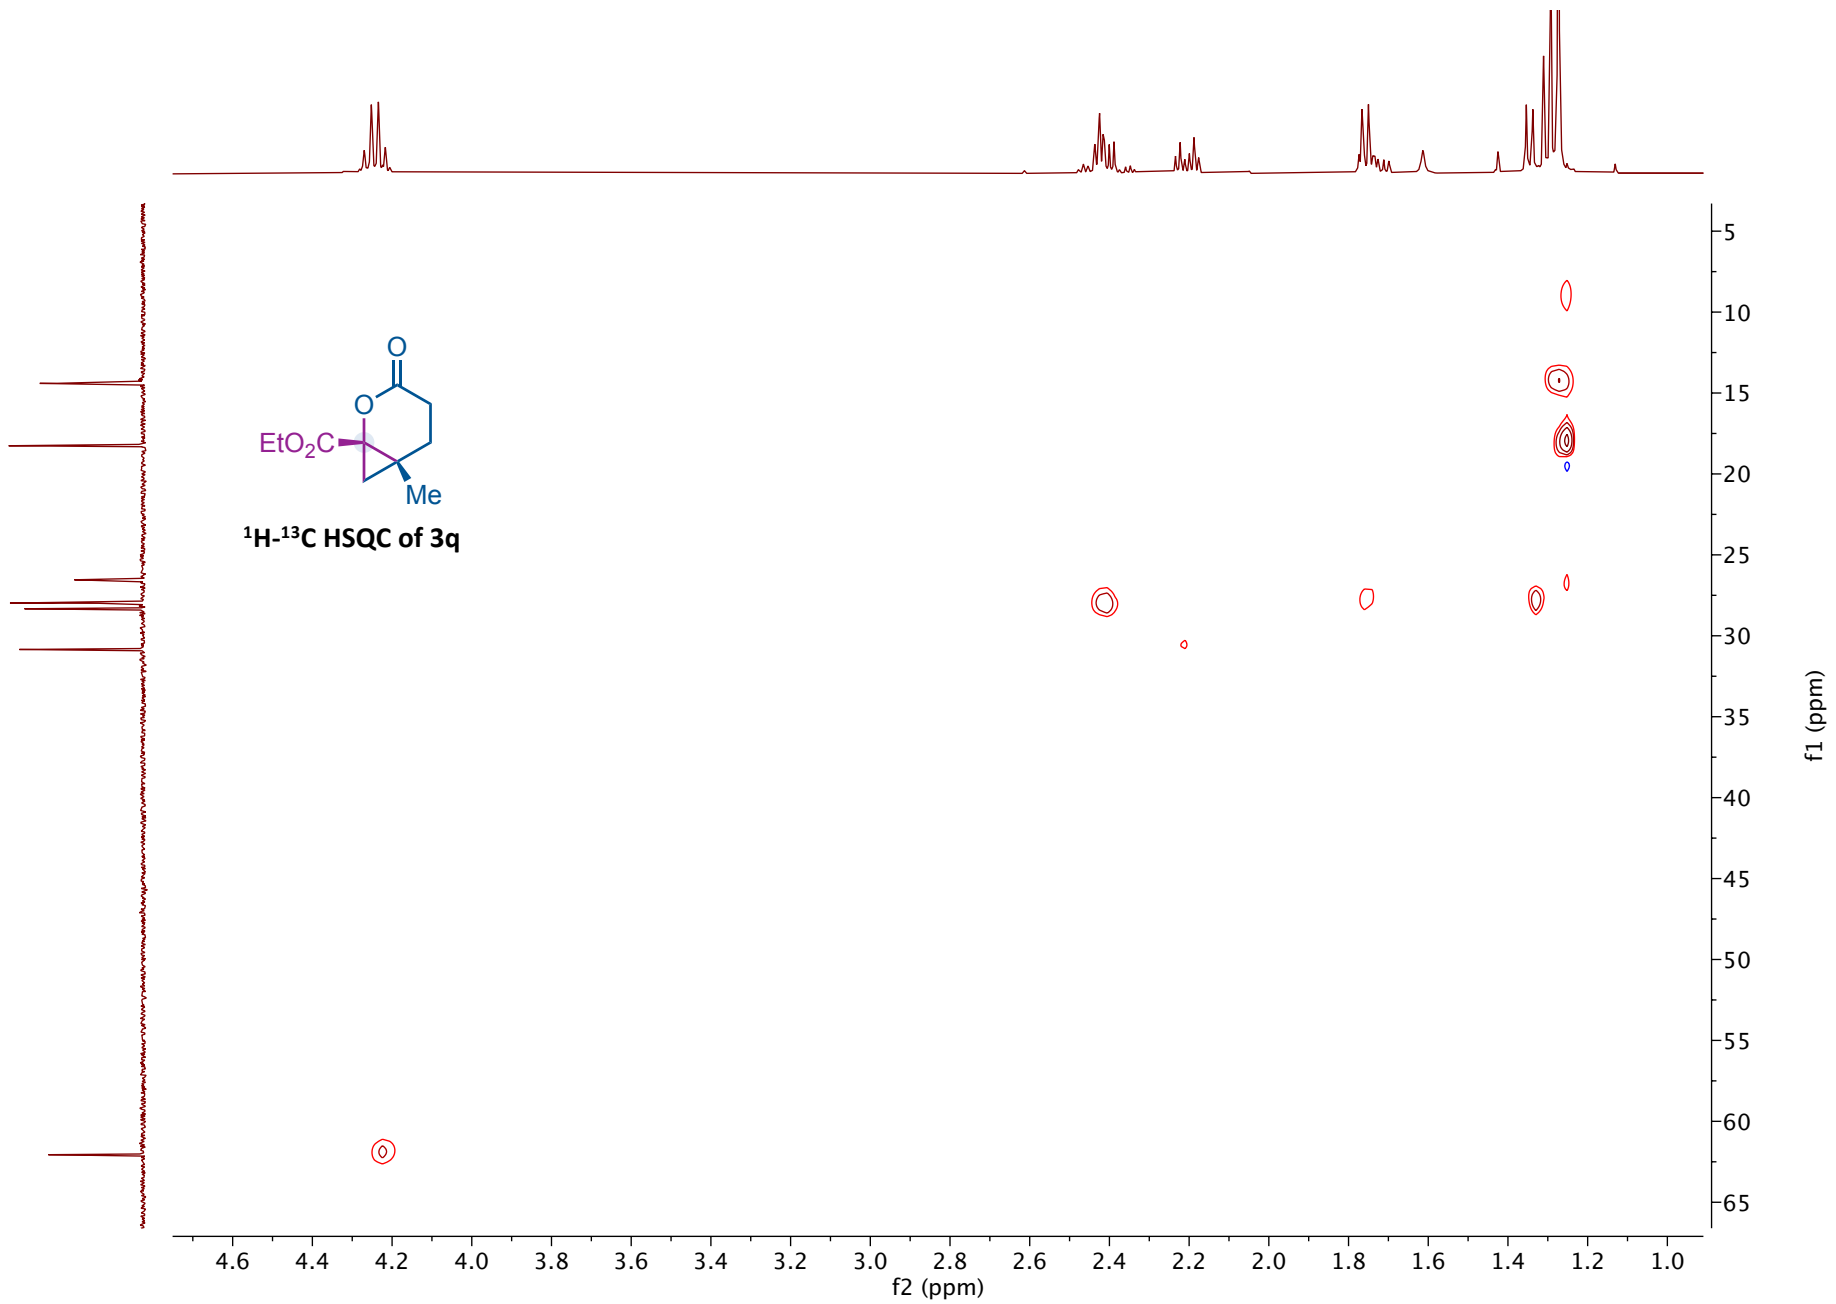



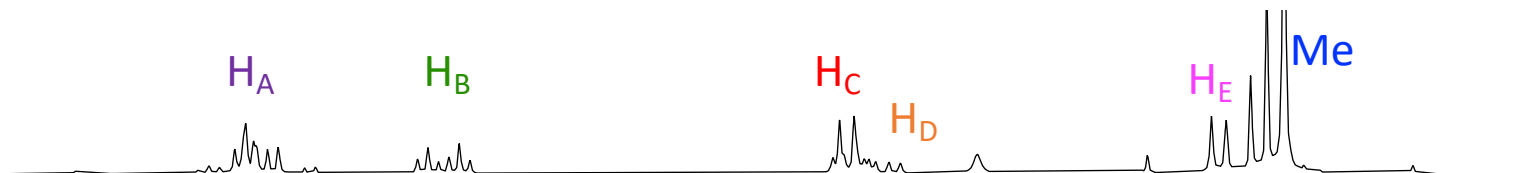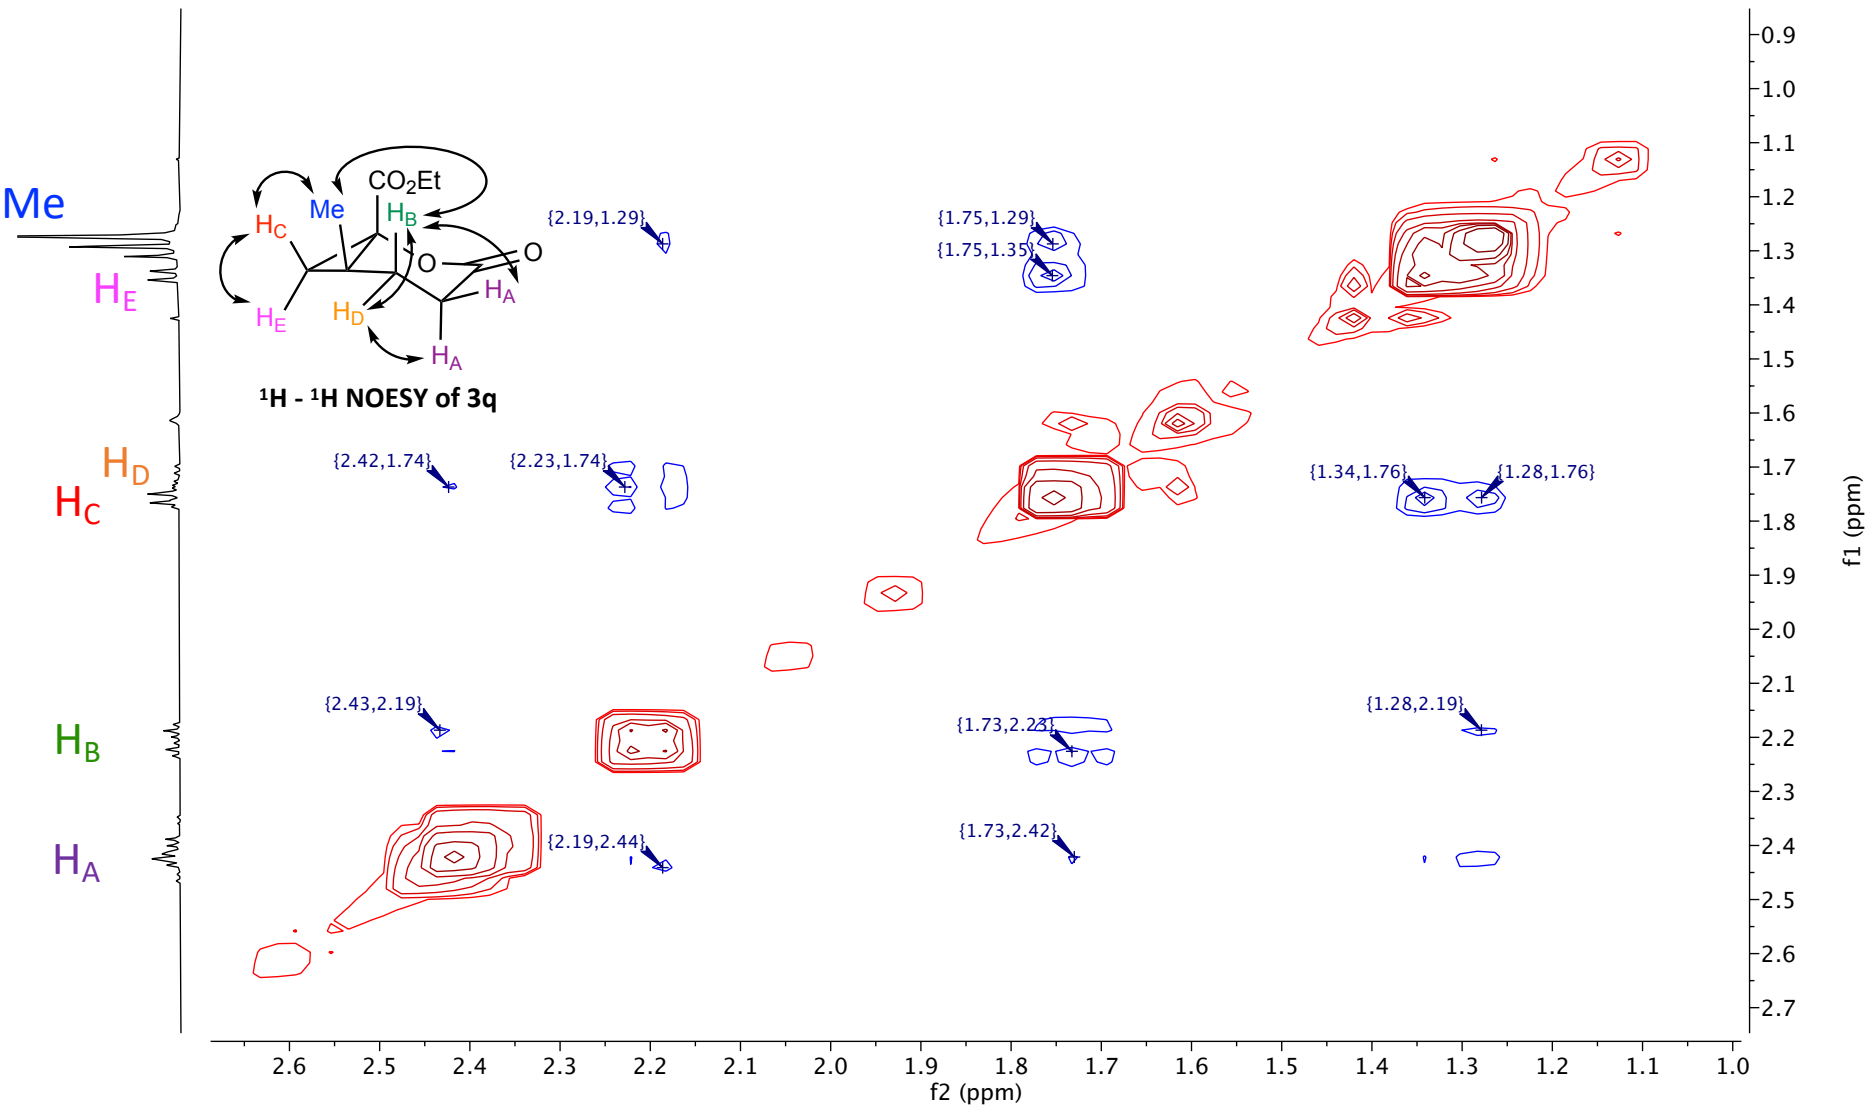

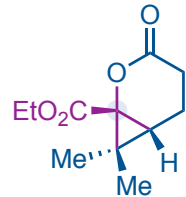

$^1\text{H}$  NMR of **3r** (400 MHz,  $\text{CDCl}_3$ )

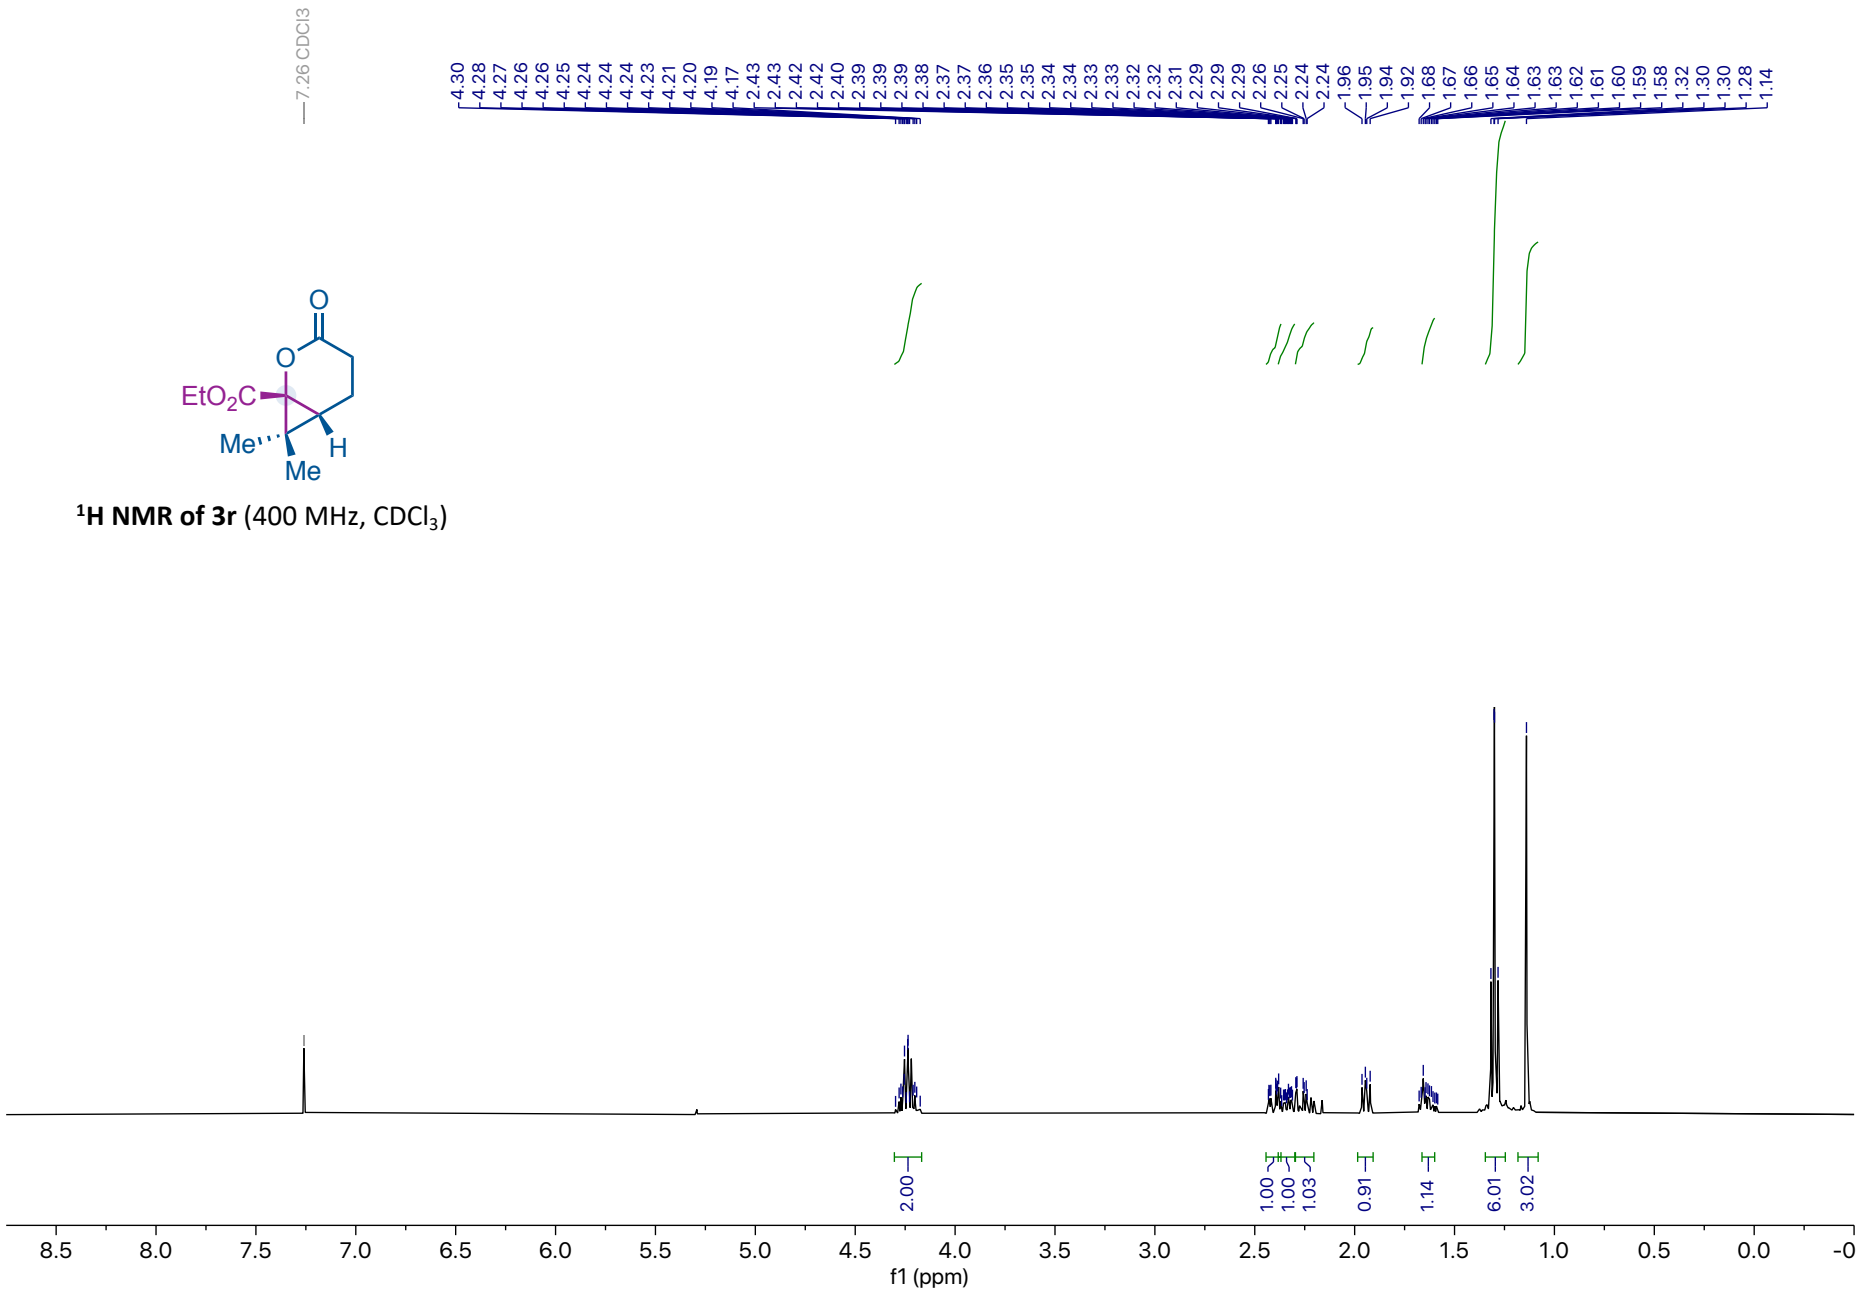

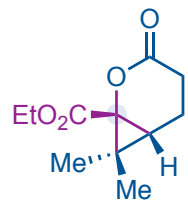

<sup>13</sup>C NMR of 3r (101 MHz, CDCl<sub>3</sub>)

171.69  
169.62

77.16 CDCl<sub>3</sub>

67.79

61.92

31.71  
29.15  
28.92

21.08  
17.80  
15.27  
14.37

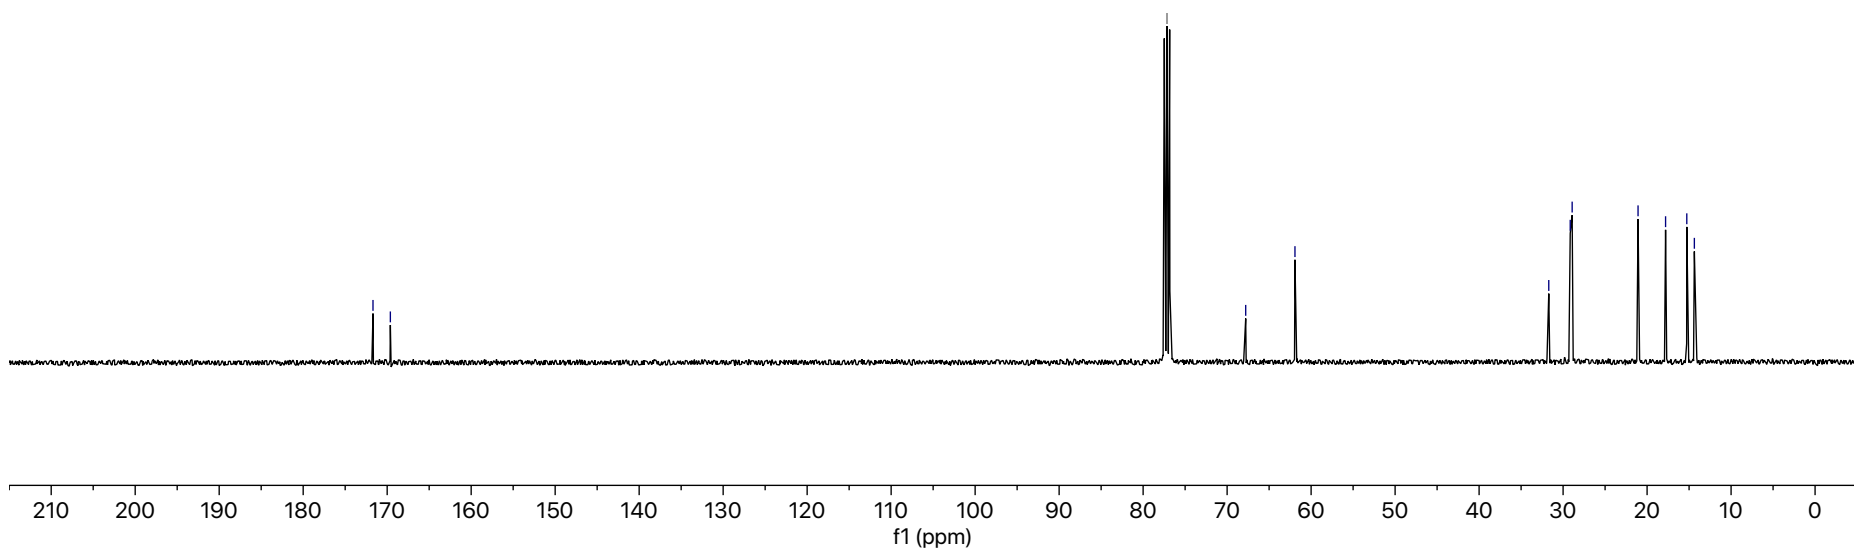

— 7.26 CDCl<sub>3</sub>

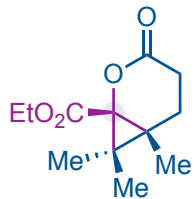

<sup>1</sup>H NMR of 3s (400 MHz, CDCl<sub>3</sub>)

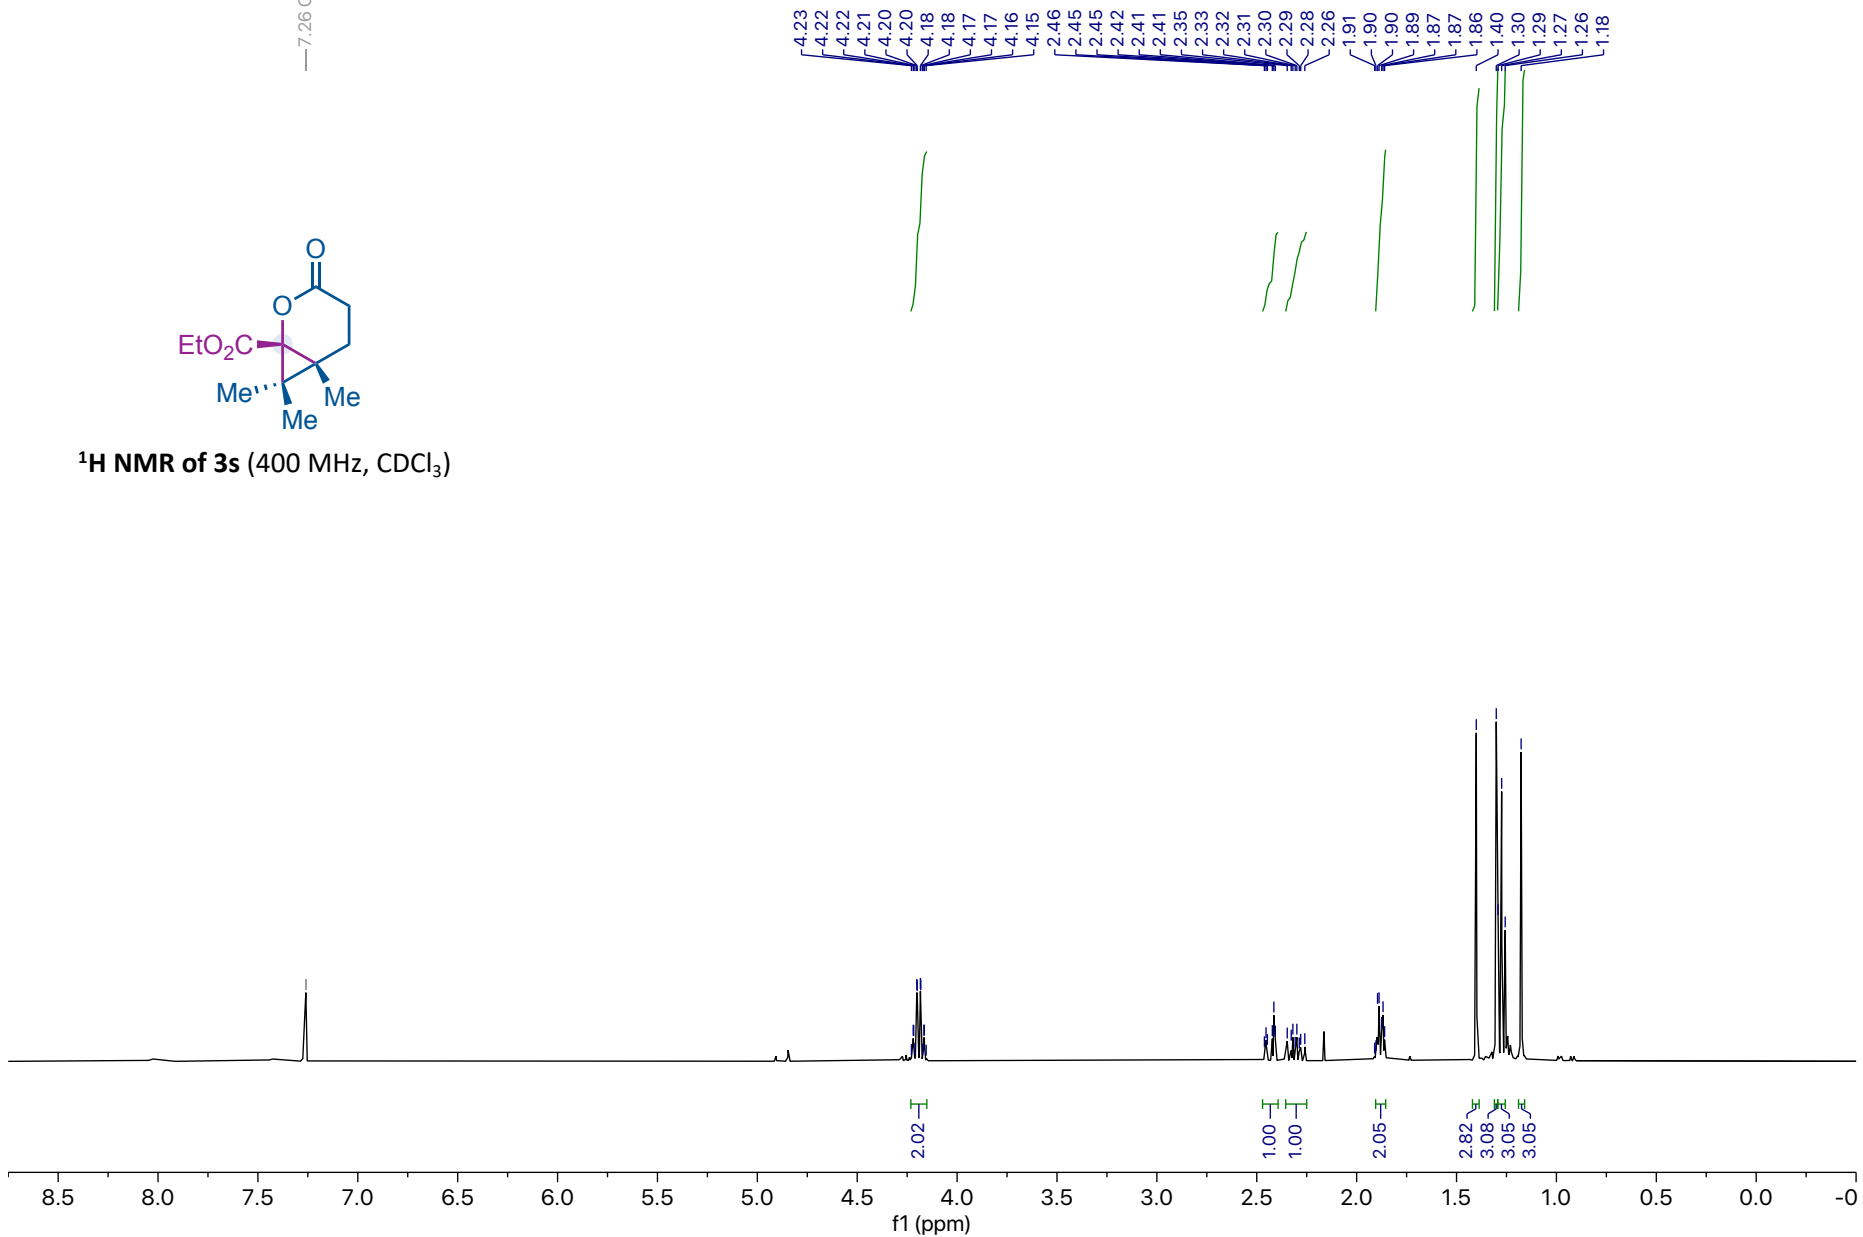

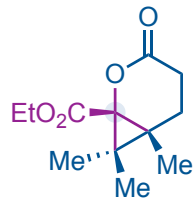

<sup>13</sup>C NMR of 3s (101 MHz, CDCl<sub>3</sub>)

— 173.02  
— 168.55

— 77.16 CDCl<sub>3</sub>

— 69.40

— 61.48

— 33.67

— 31.60

— 28.45

— 26.65

— 17.83

— 17.54

— 16.06

— 14.36

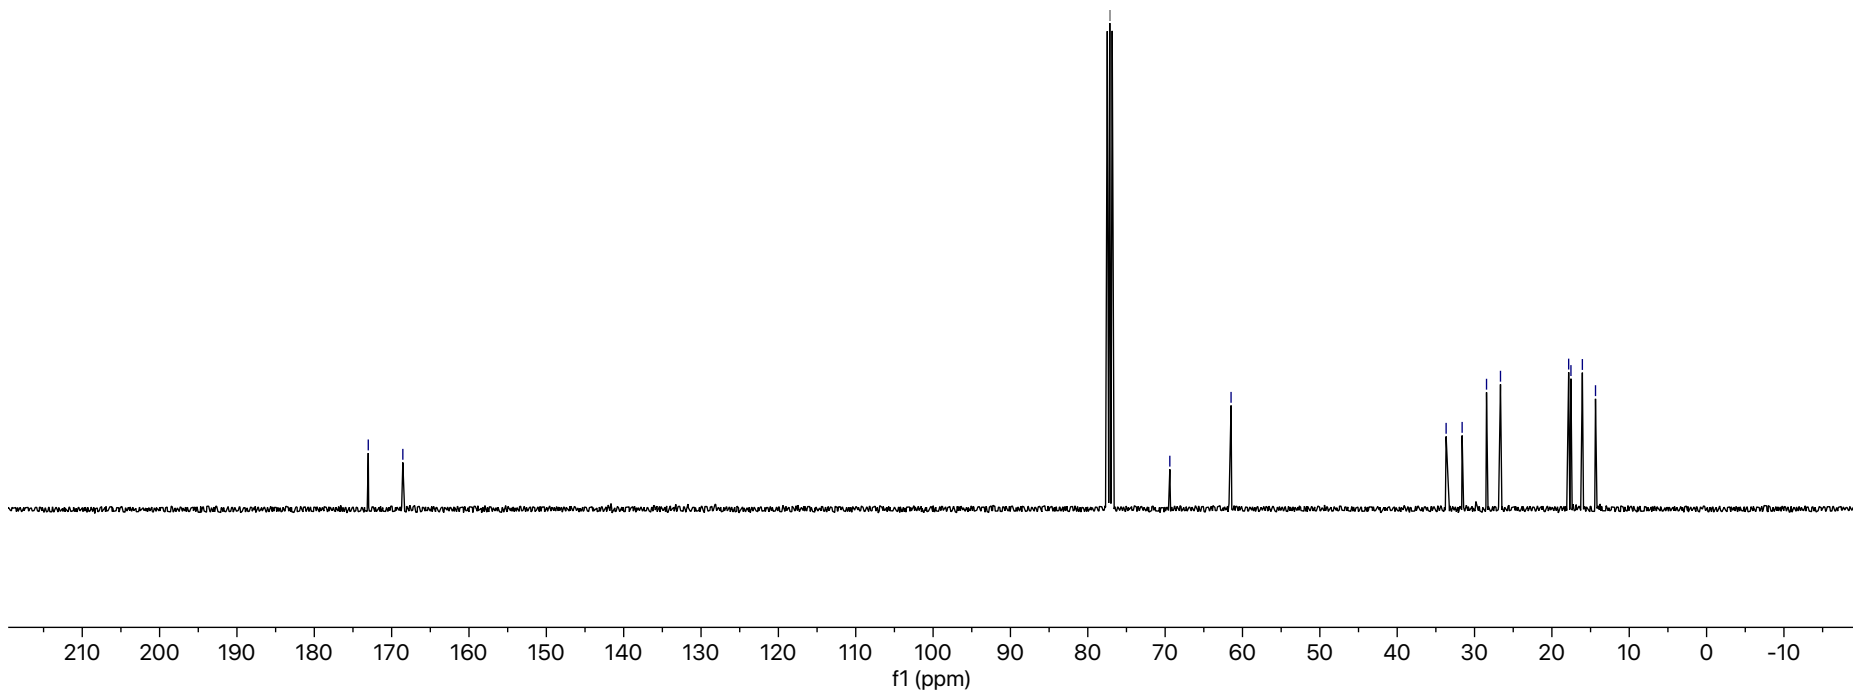

—7.26 CDCl3

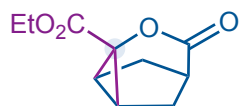

**<sup>1</sup>H NMR of 3t** (400 MHz, CDCl<sub>3</sub>)

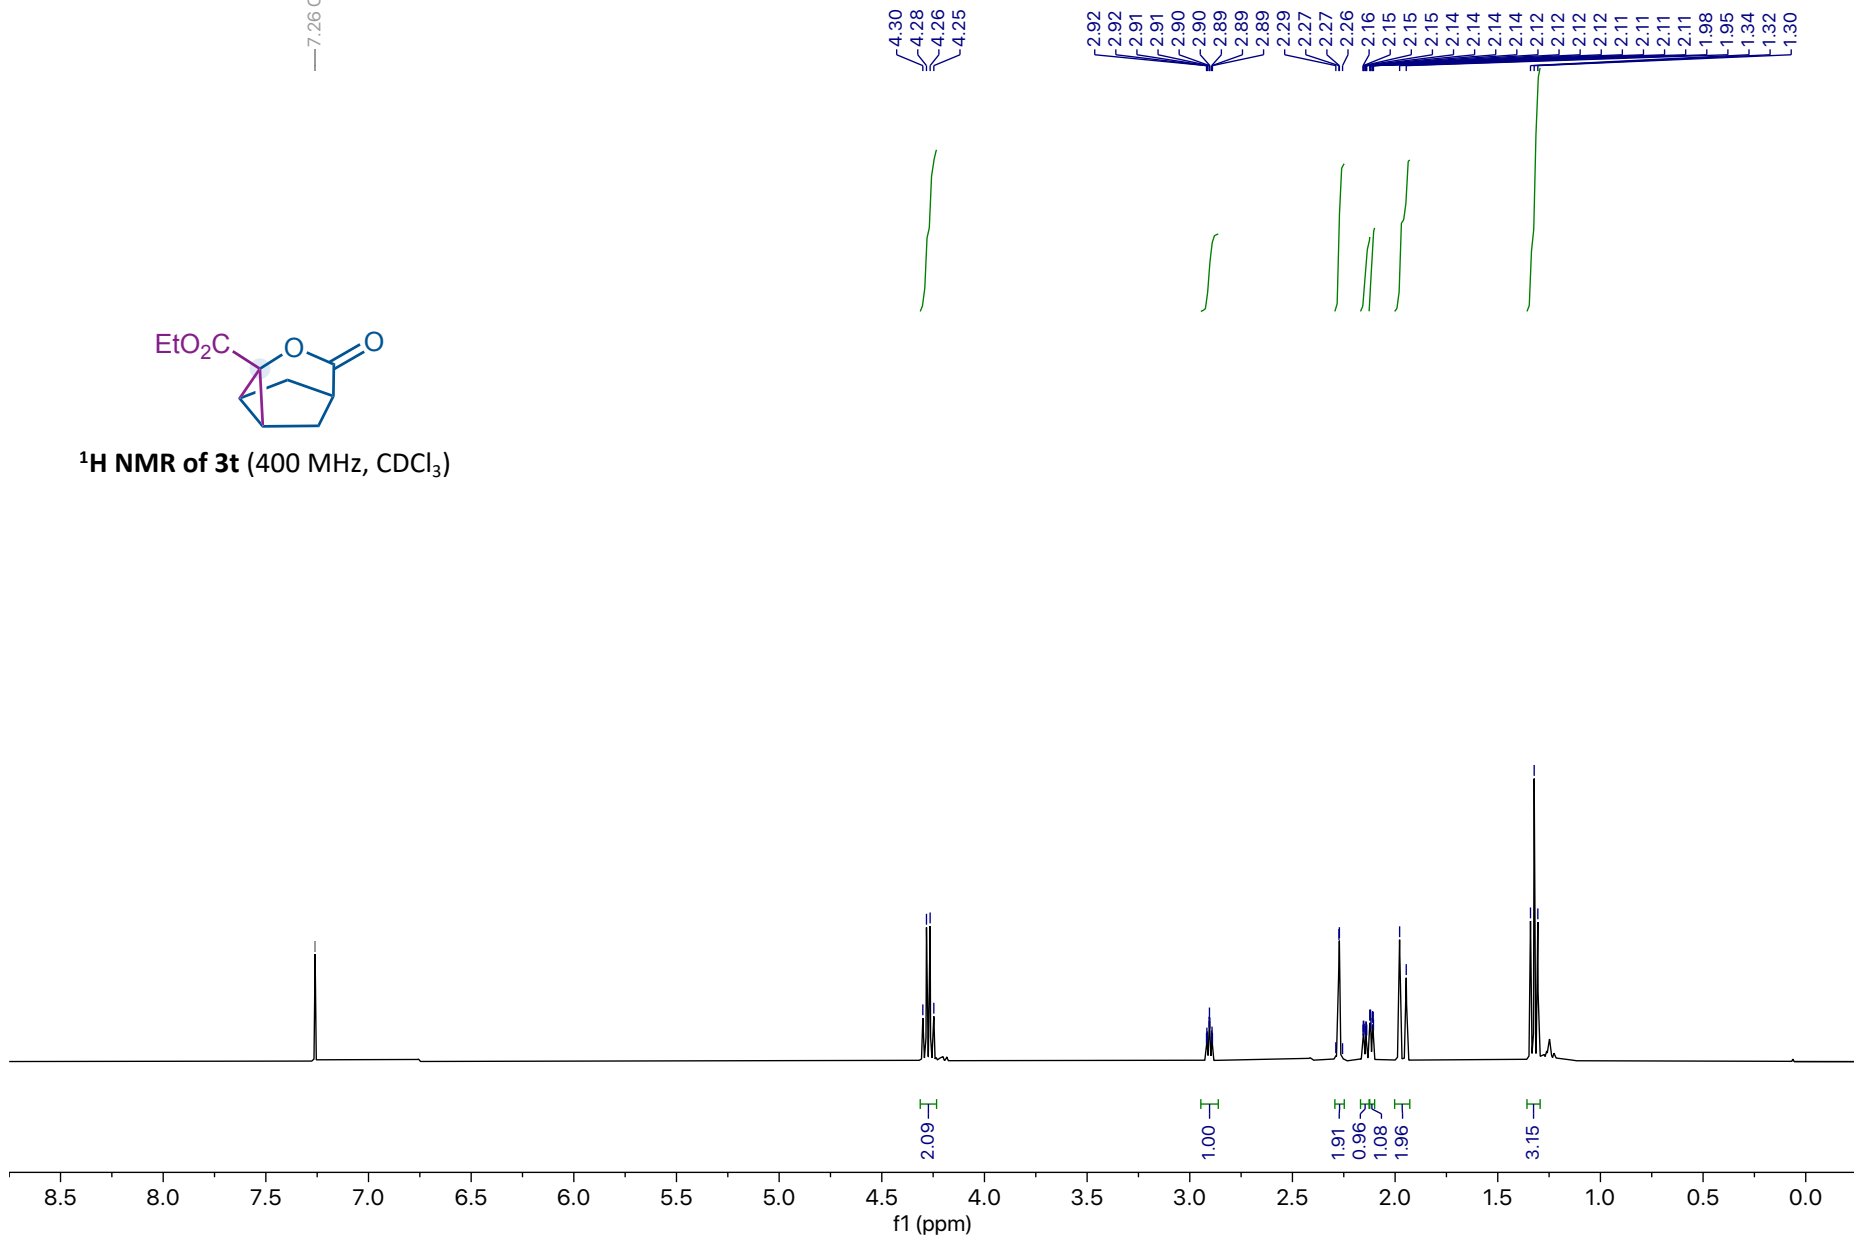

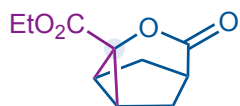

<sup>13</sup>C NMR of 3t (101 MHz, CDCl<sub>3</sub>)

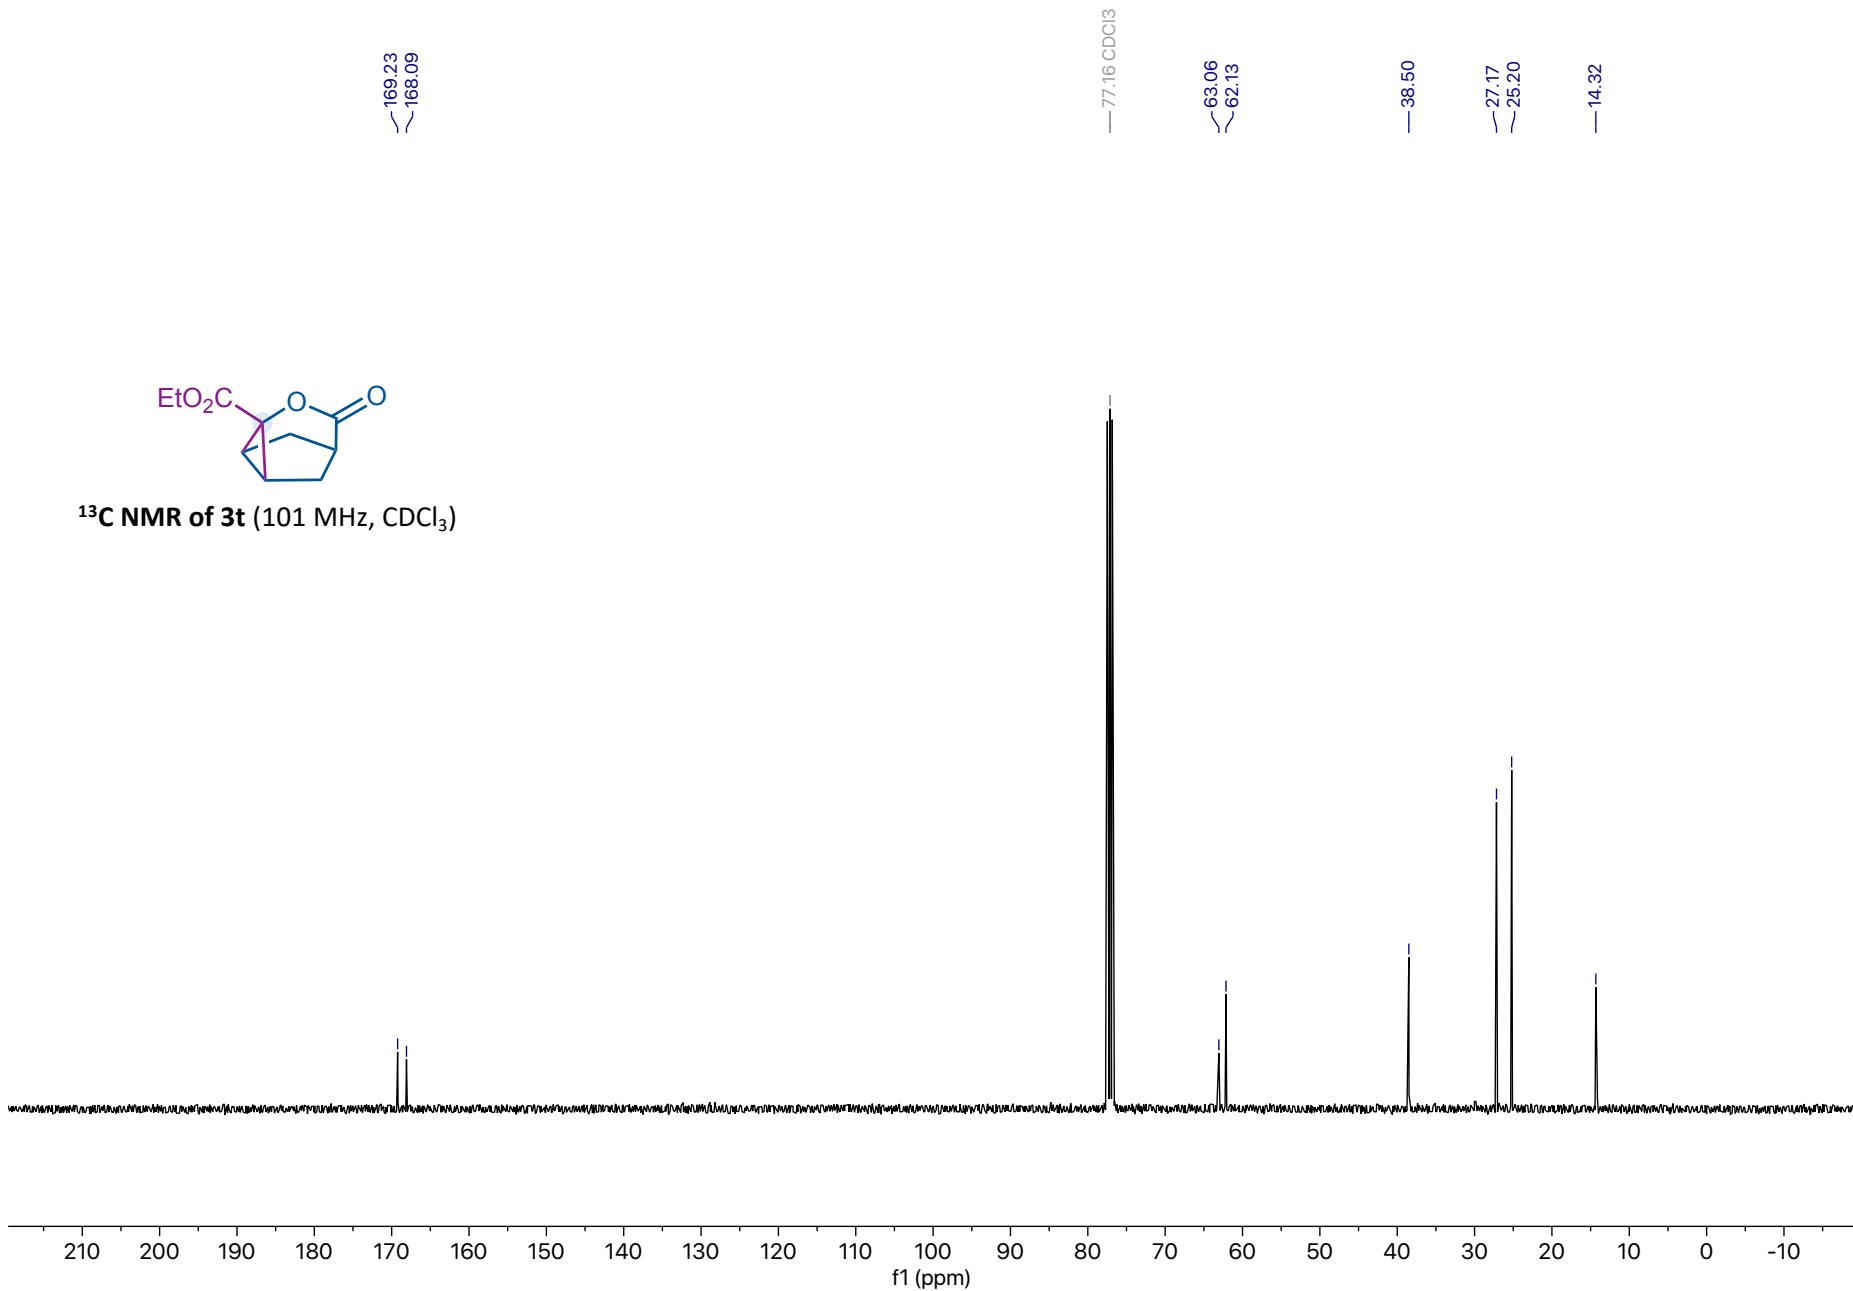

7.26 CDCl<sub>3</sub>

4.28  
4.26  
4.24  
4.22  
2.74  
2.74  
2.74  
2.73  
2.73  
2.72  
2.72  
2.71  
2.31  
2.30  
2.29  
2.29  
2.28  
2.27  
2.27  
2.26  
2.26  
2.26  
2.25  
2.25  
2.24  
2.24  
2.23  
2.23  
2.23  
2.14  
2.14  
2.13  
2.13  
2.12  
2.11  
2.11  
2.10  
2.10  
2.09  
2.07  
2.06  
2.06  
2.05  
2.05  
2.04  
2.04  
2.04  
2.03  
2.03  
2.02  
2.01  
2.01  
1.93  
1.93  
1.92  
1.92  
1.91  
1.91  
1.90  
1.88  
1.87  
1.87  
1.87  
1.85  
1.84  
1.84  
1.82  
1.82  
1.61  
1.60  
1.60  
1.59  
1.58  
1.58  
1.58  
1.57  
1.57  
1.56  
1.56  
1.55  
1.55  
1.55  
1.33  
1.31  
1.30

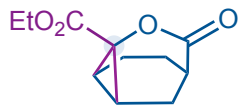

<sup>1</sup>H NMR of **3u** (400 MHz, CDCl<sub>3</sub>)

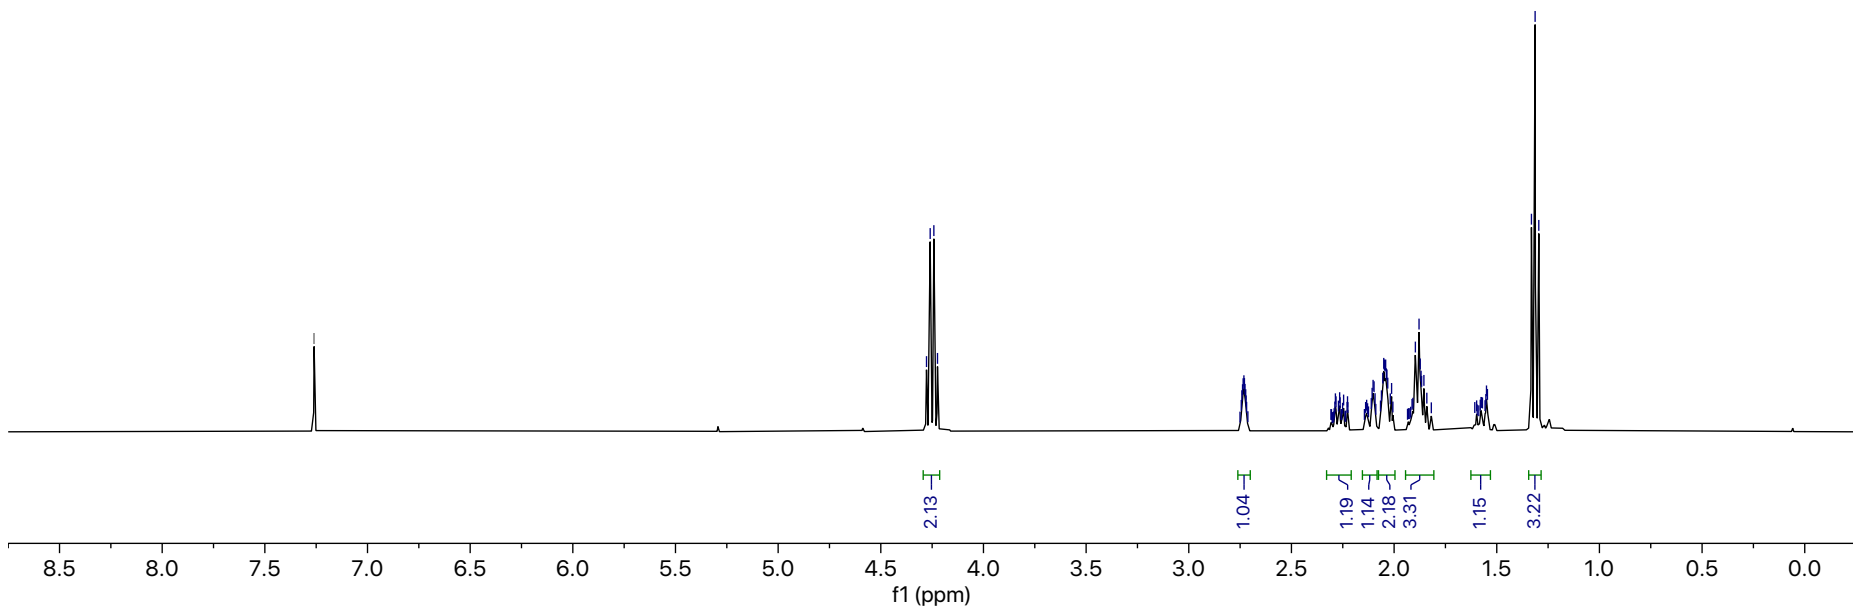



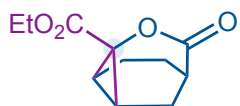

<sup>13</sup>C NMR of 3u (101 MHz, CDCl<sub>3</sub>)

170.59  
169.63

77.16 CDCl<sub>3</sub>

64.00  
62.07

36.56

24.60  
21.67  
21.53  
19.75  
15.50  
14.35

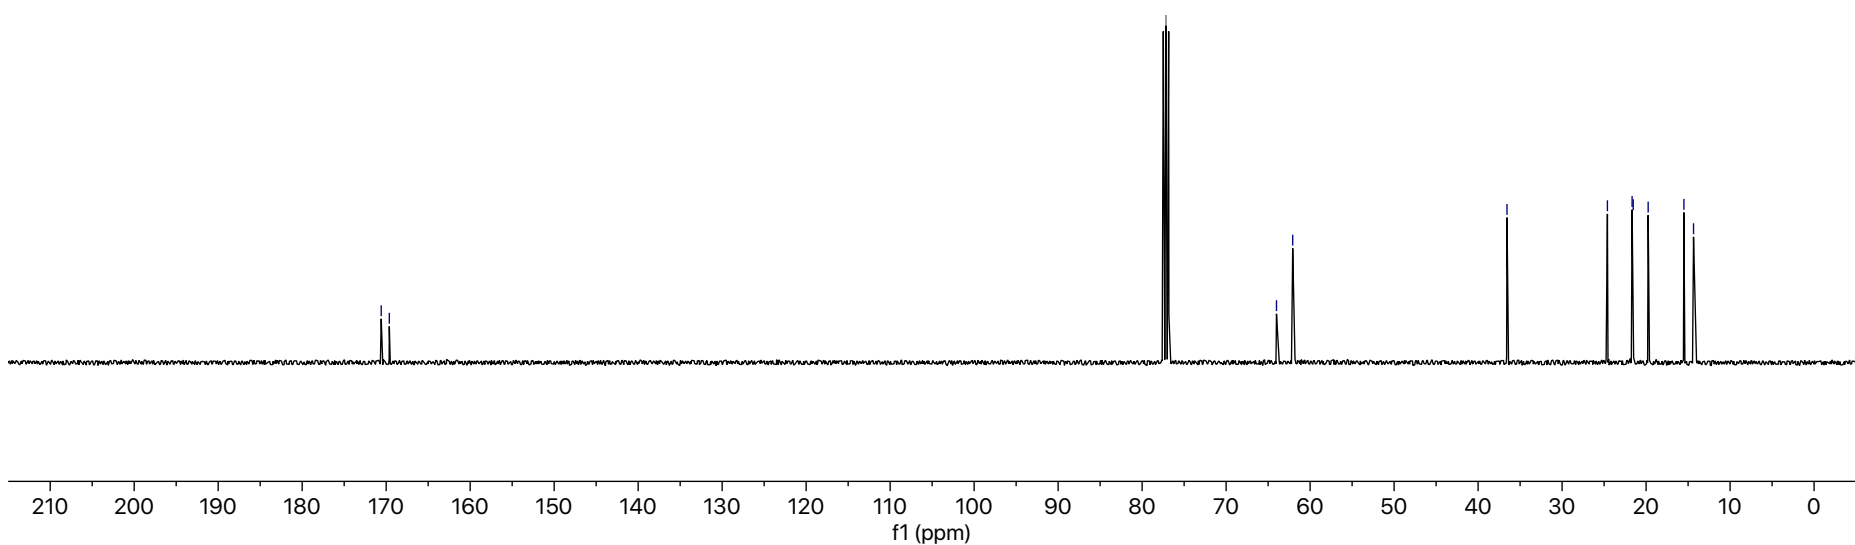

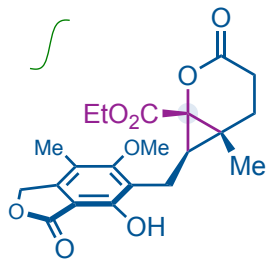

<sup>1</sup>H NMR of 3v (500 MHz, CDCl<sub>3</sub>)

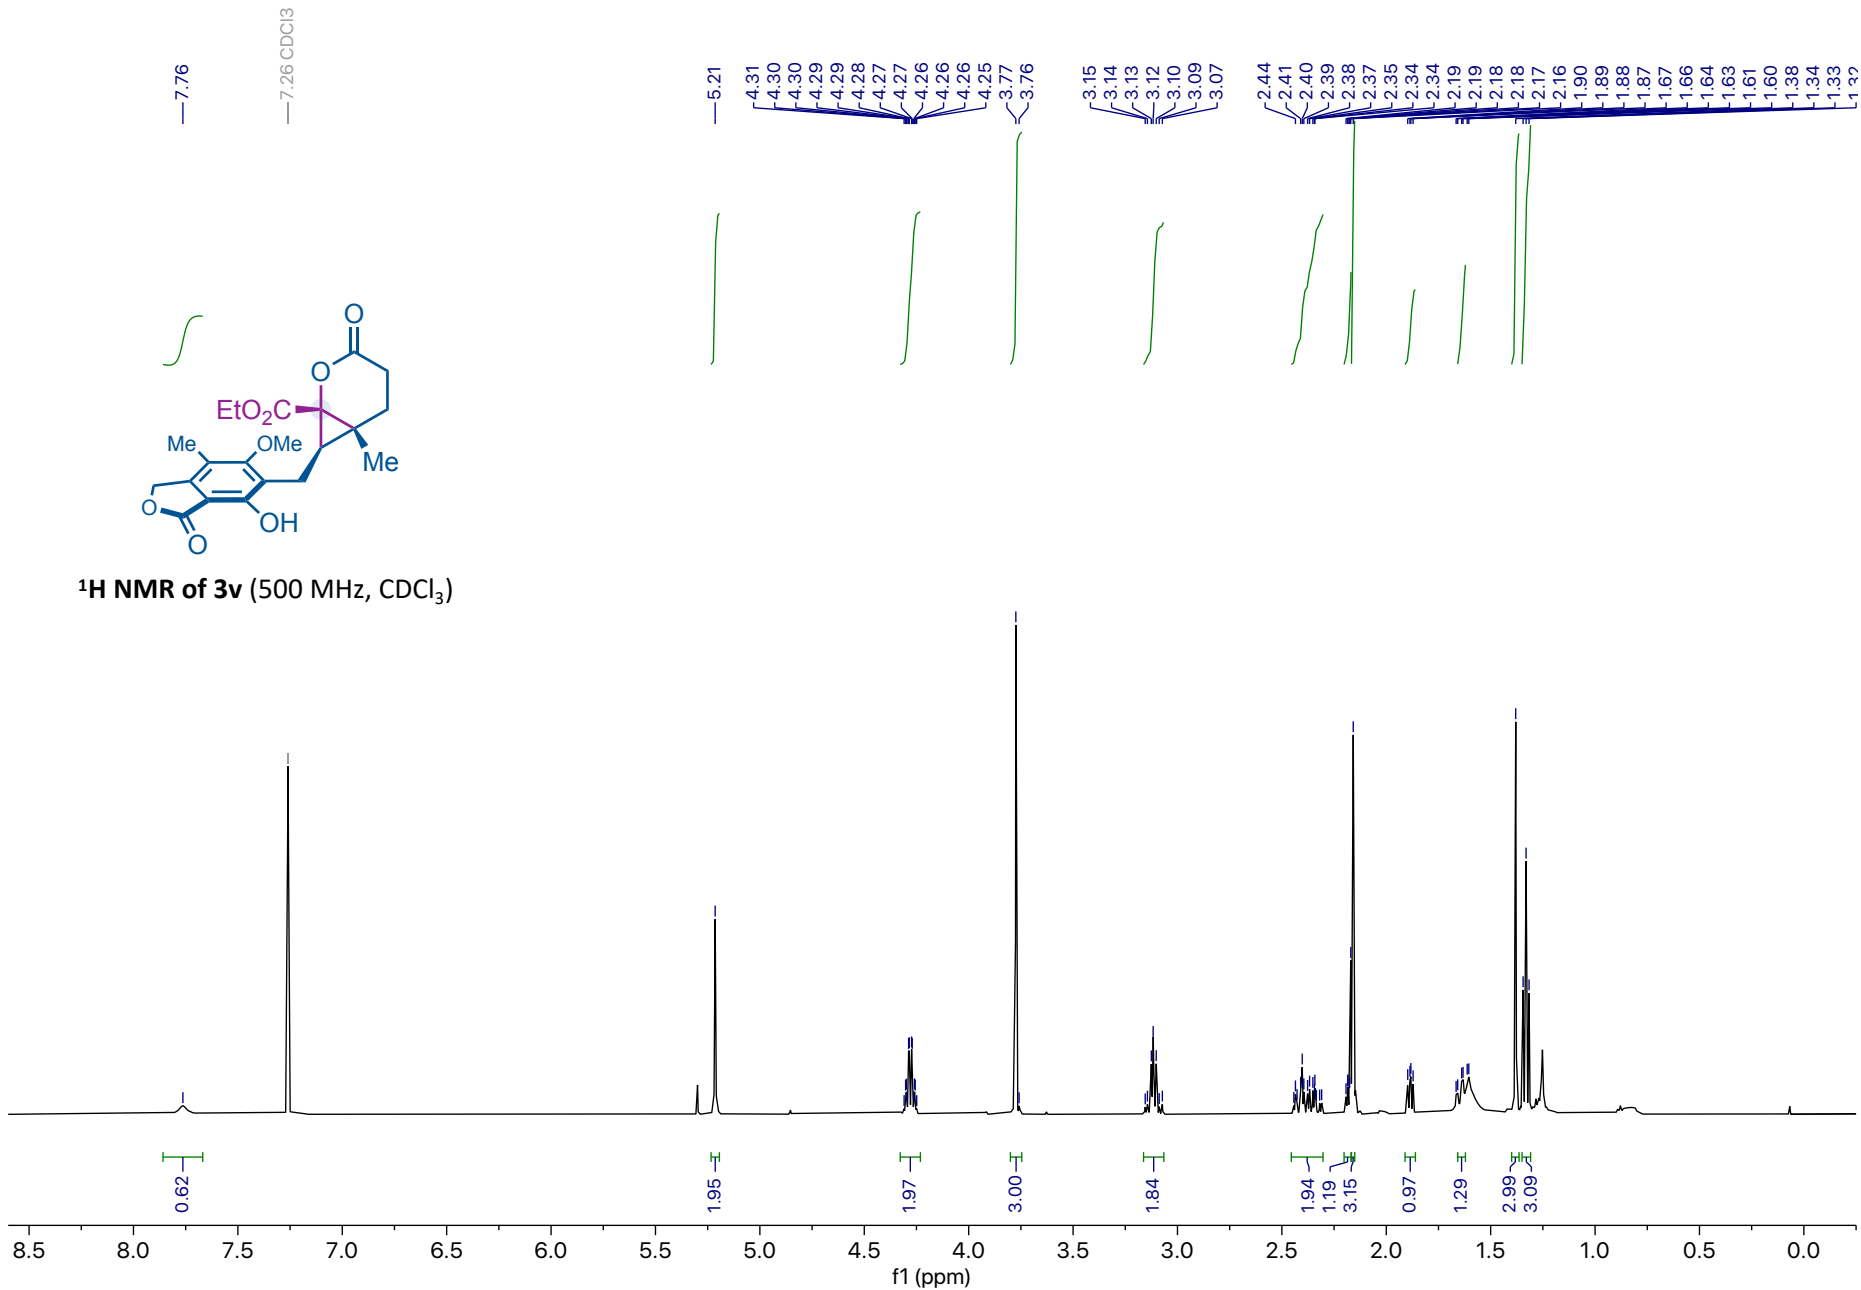

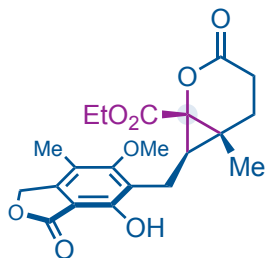

**<sup>13</sup>C NMR of 3v** (126 MHz, CDCl<sub>3</sub>)

173.00  
172.19  
168.40  
164.17

153.92

144.89

121.40

117.05

106.68

77.16 CDCl<sub>3</sub>

70.20

67.55

61.70

61.16

41.31

33.17

30.99

30.61

28.54

18.09

14.43

14.08

11.78

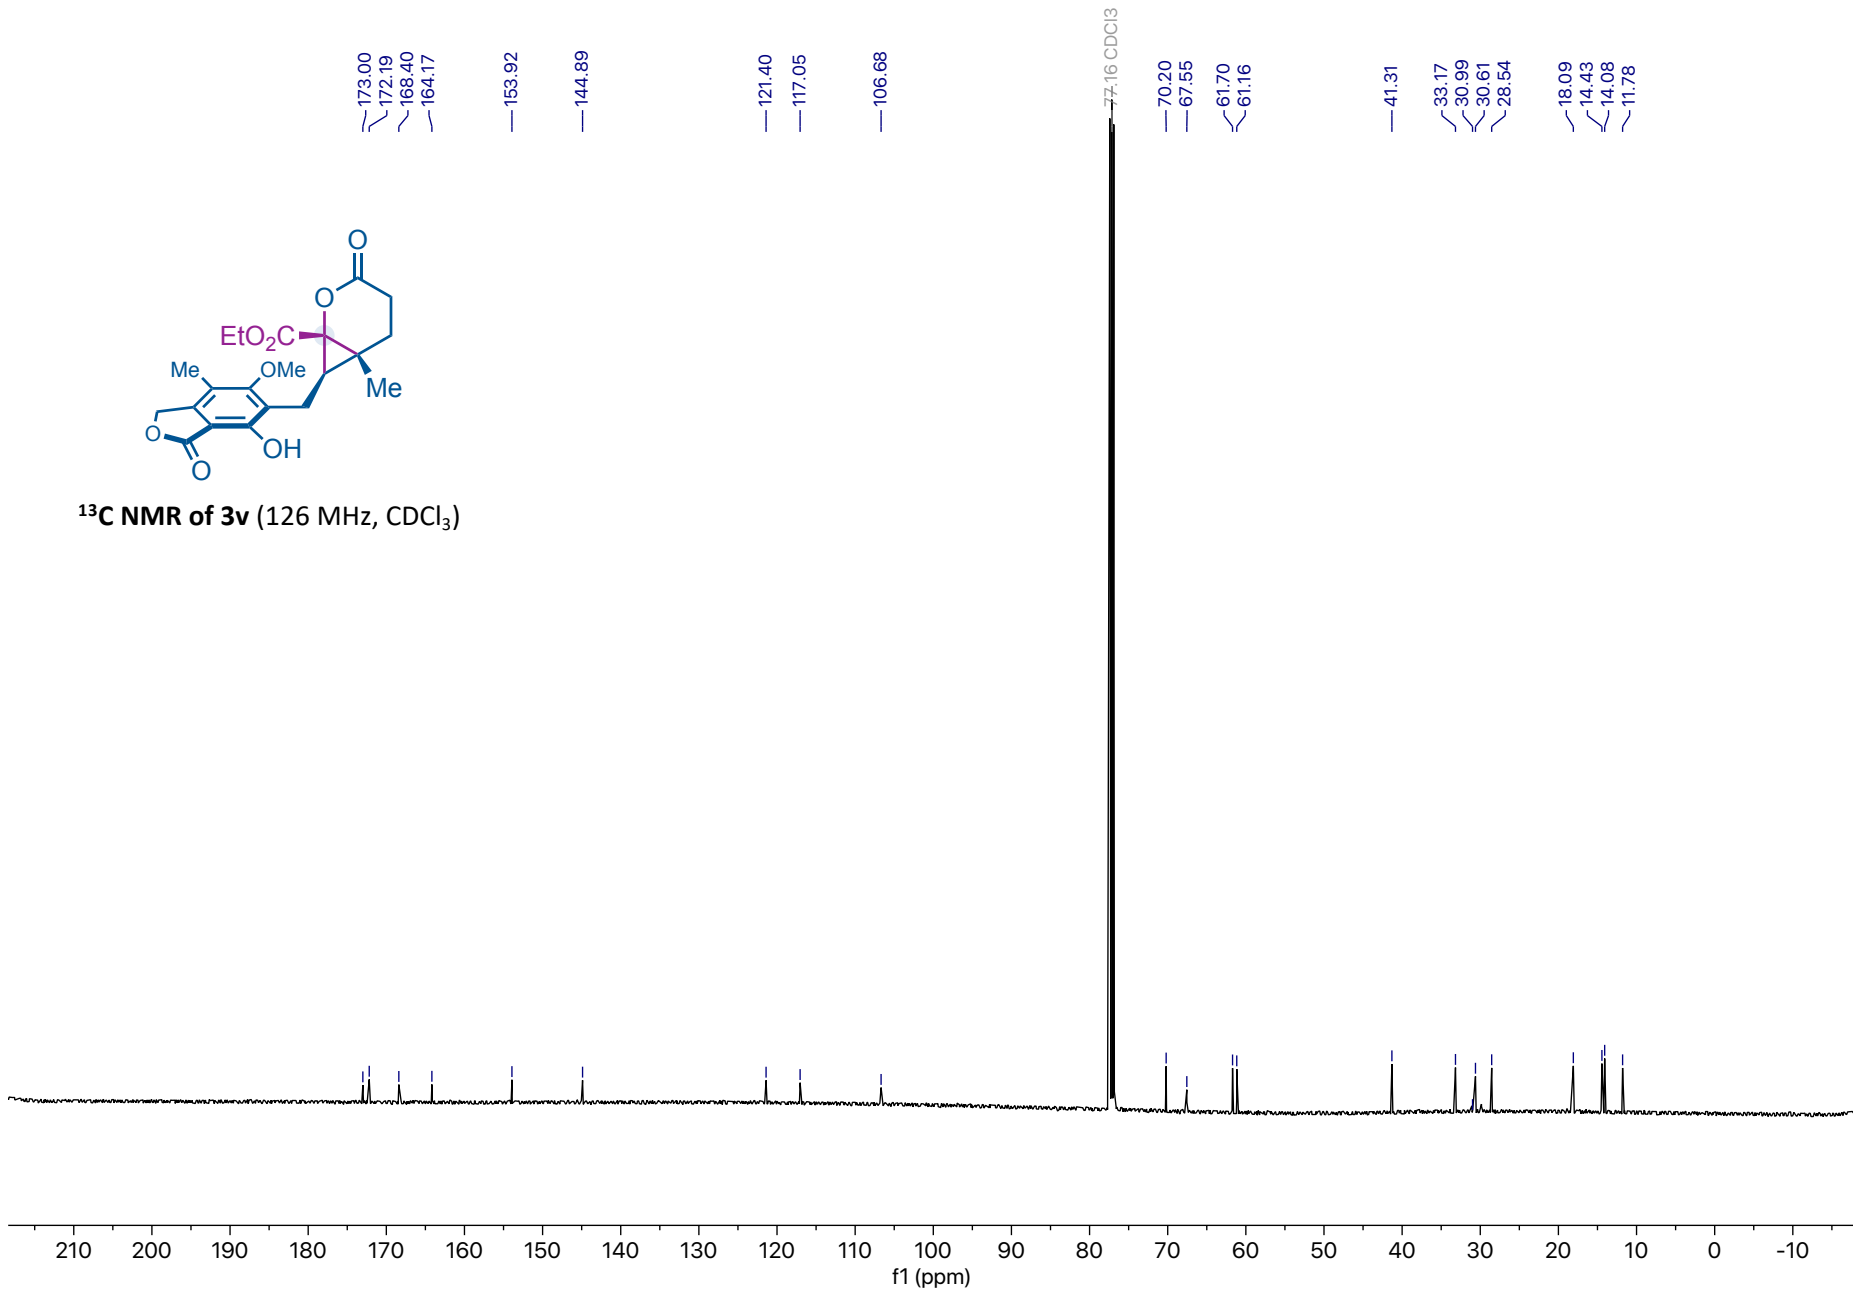

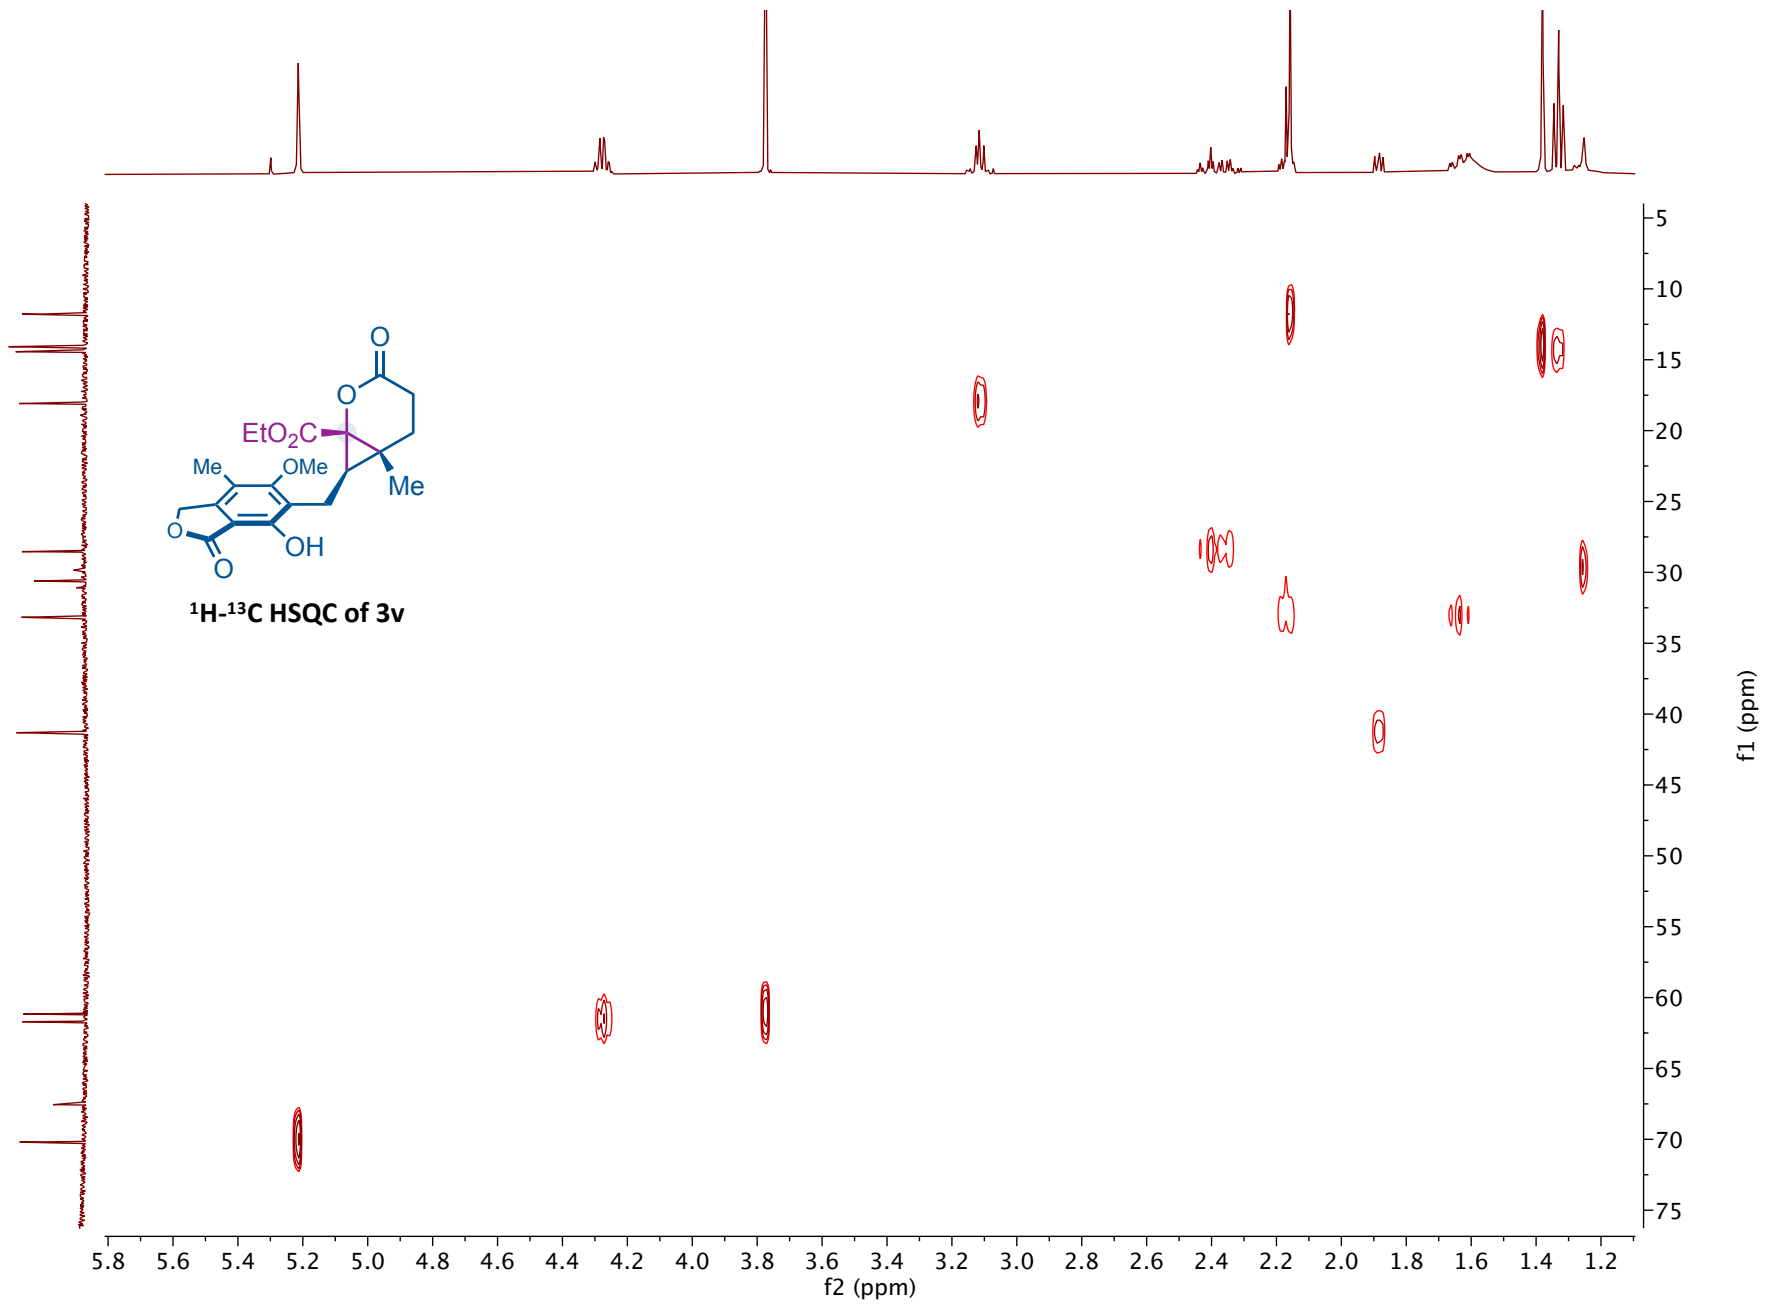

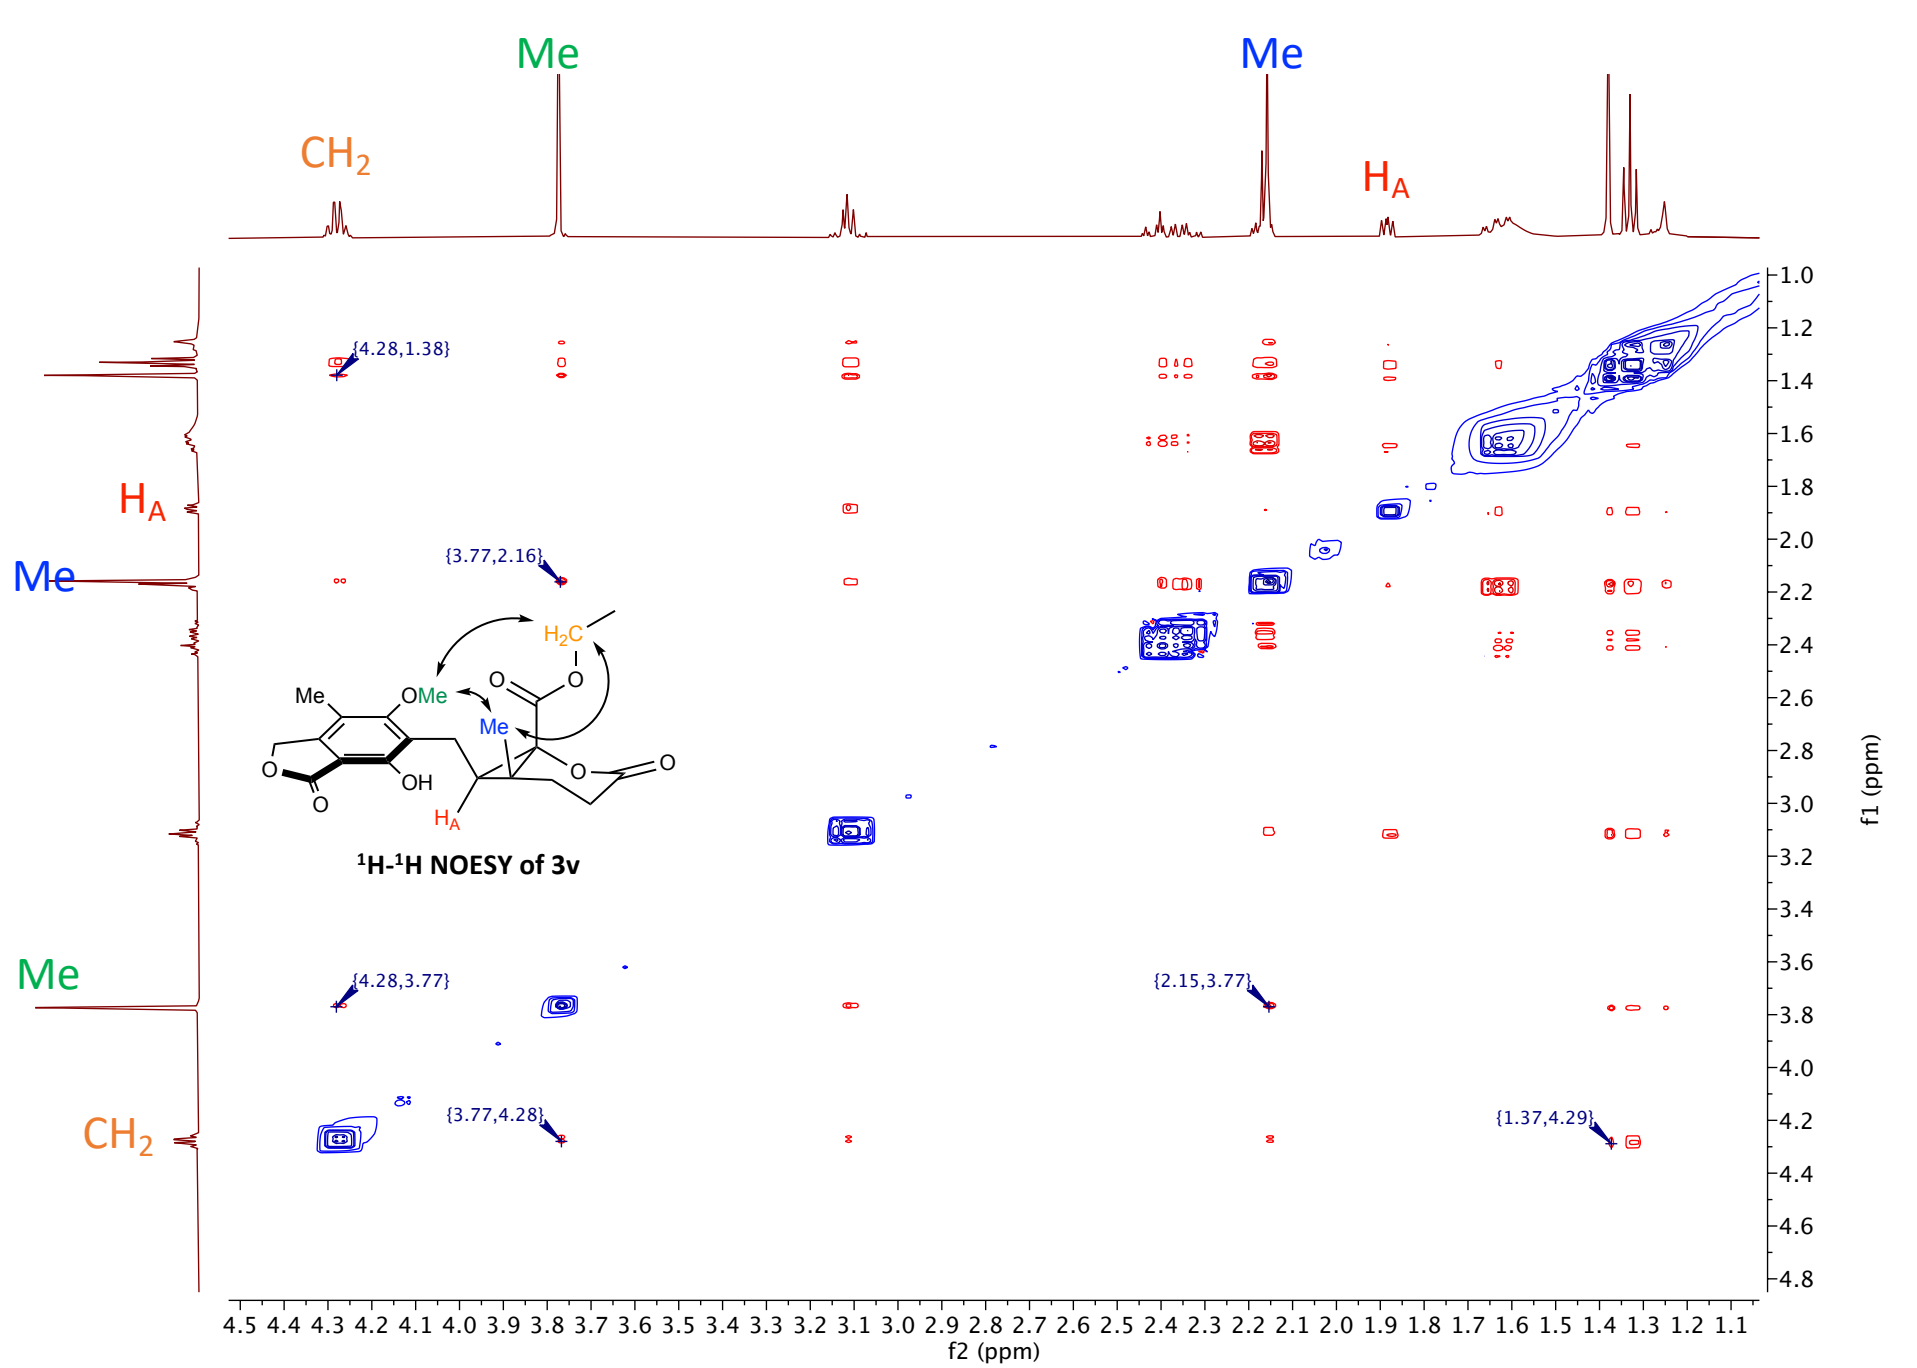

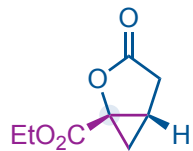

<sup>1</sup>H NMR of 3w (400 MHz, CDCl<sub>3</sub>)

—7.26 CDCl<sub>3</sub>

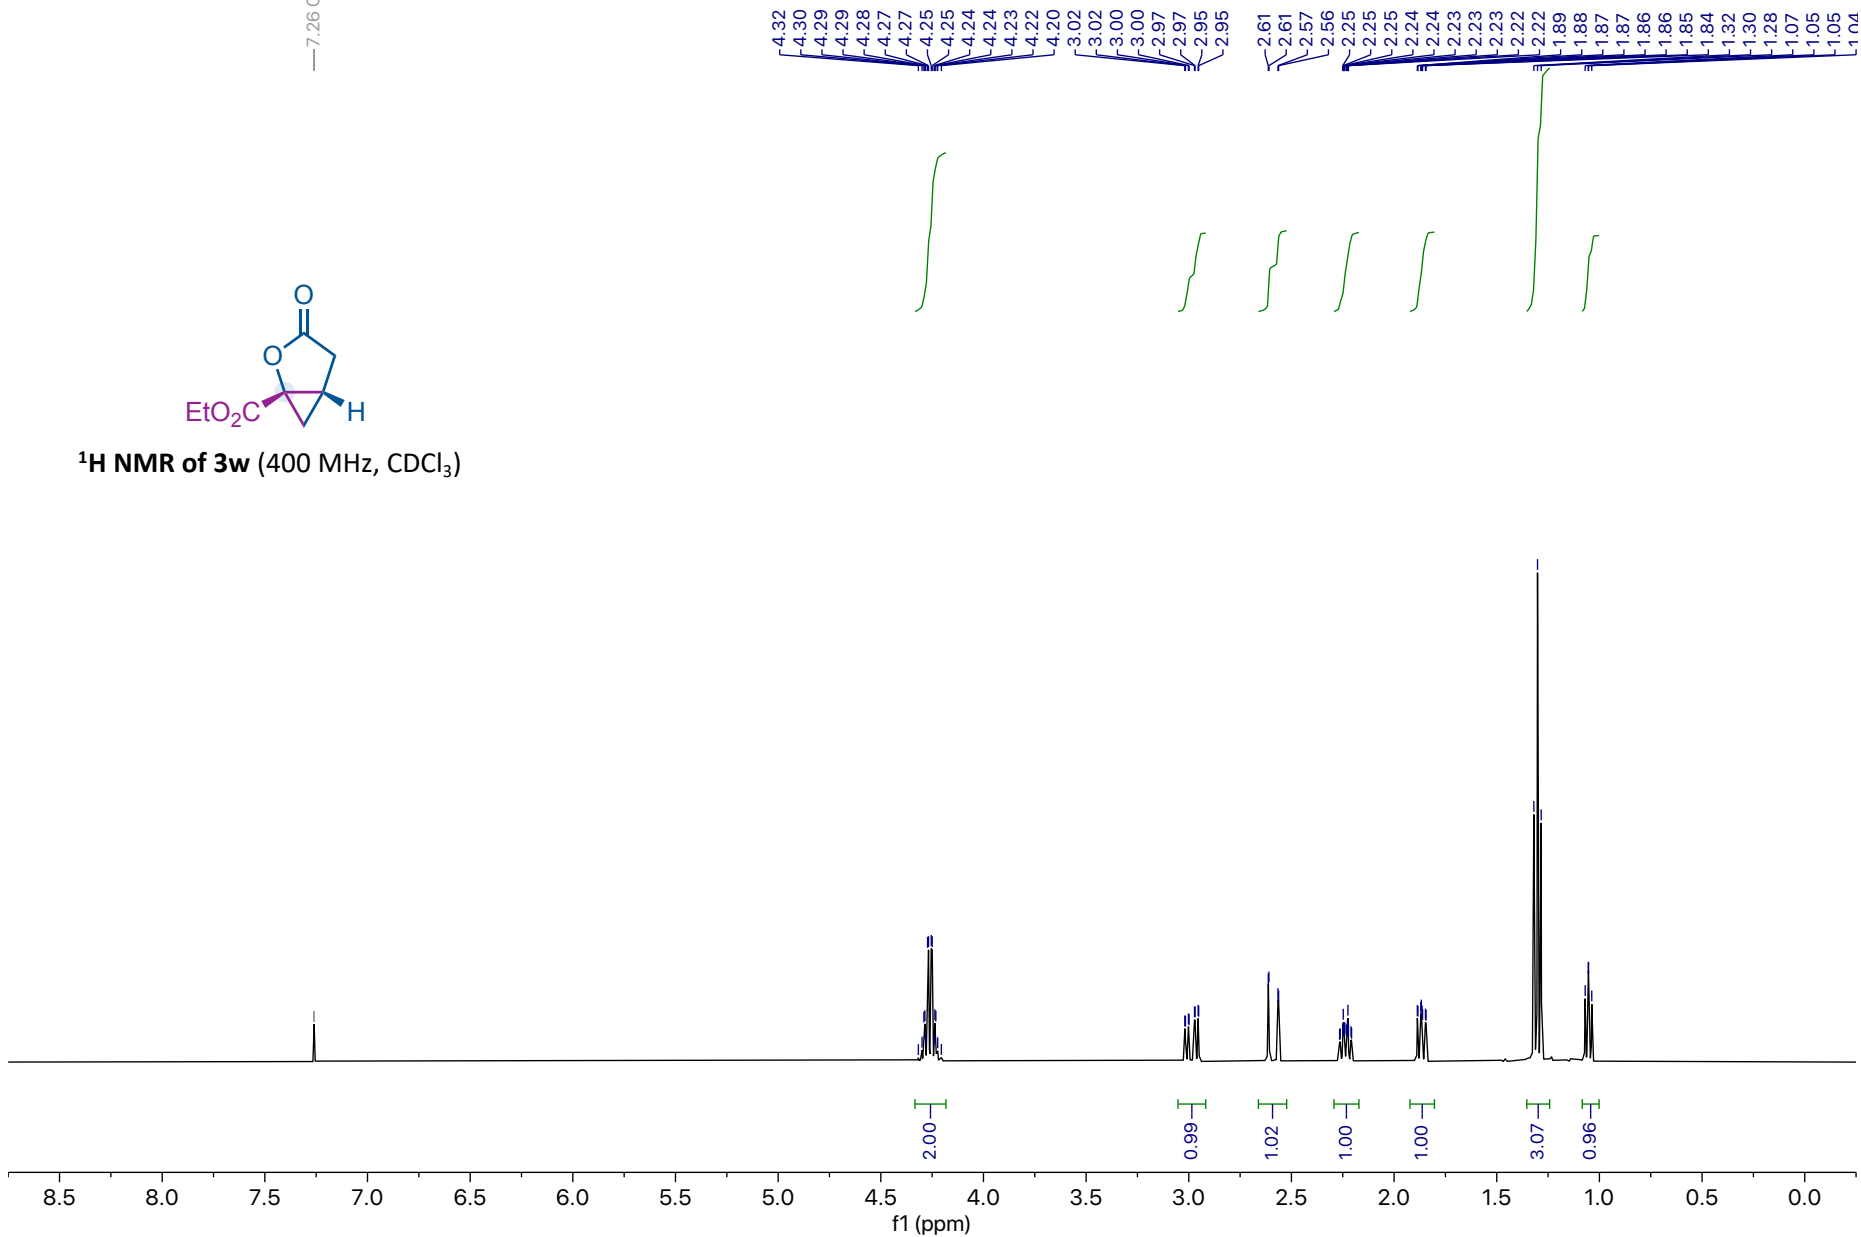

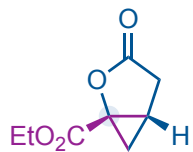

$^{13}\text{C}$  NMR of 3w (101 MHz, CDCl<sub>3</sub>)

174.96  
168.76

77.16 CDCl<sub>3</sub>

63.65  
62.14

33.14

23.35  
20.69

14.25

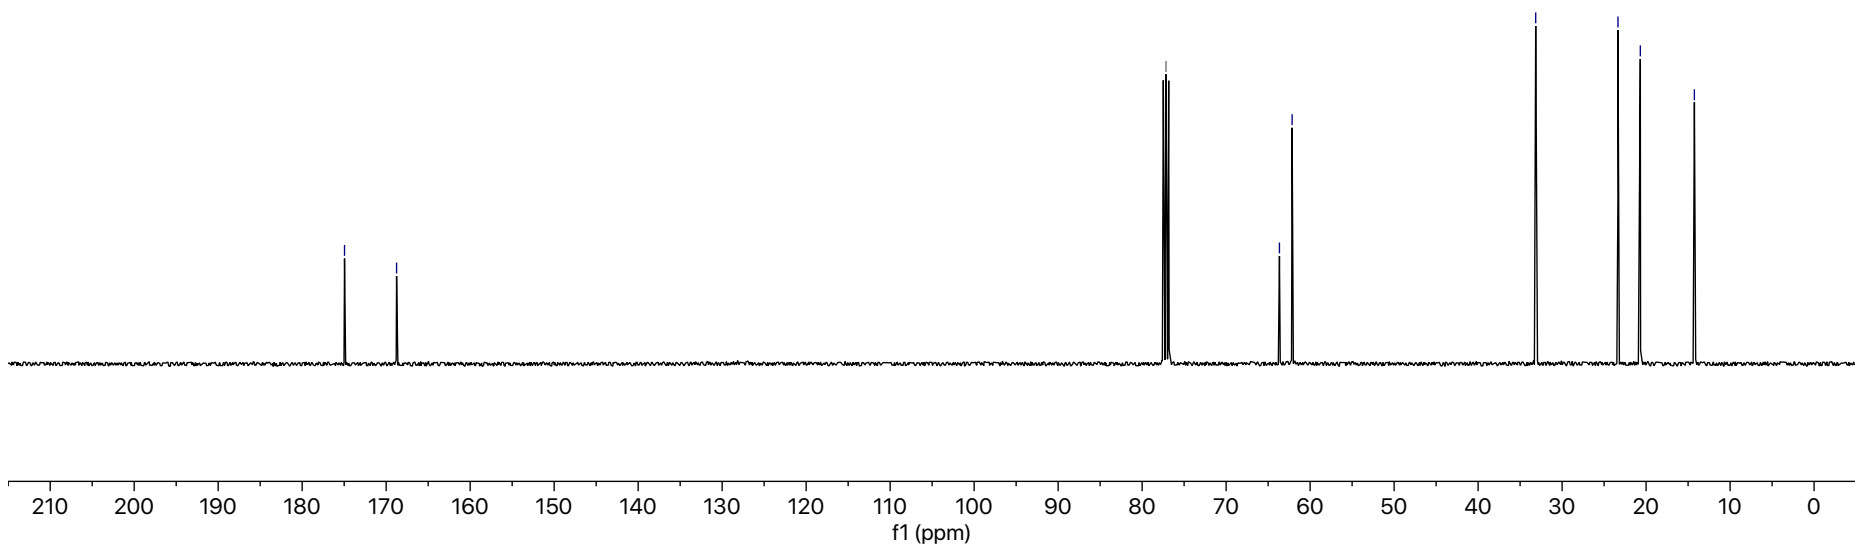

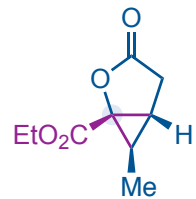

<sup>1</sup>H NMR of 3x (400 MHz, CDCl<sub>3</sub>)

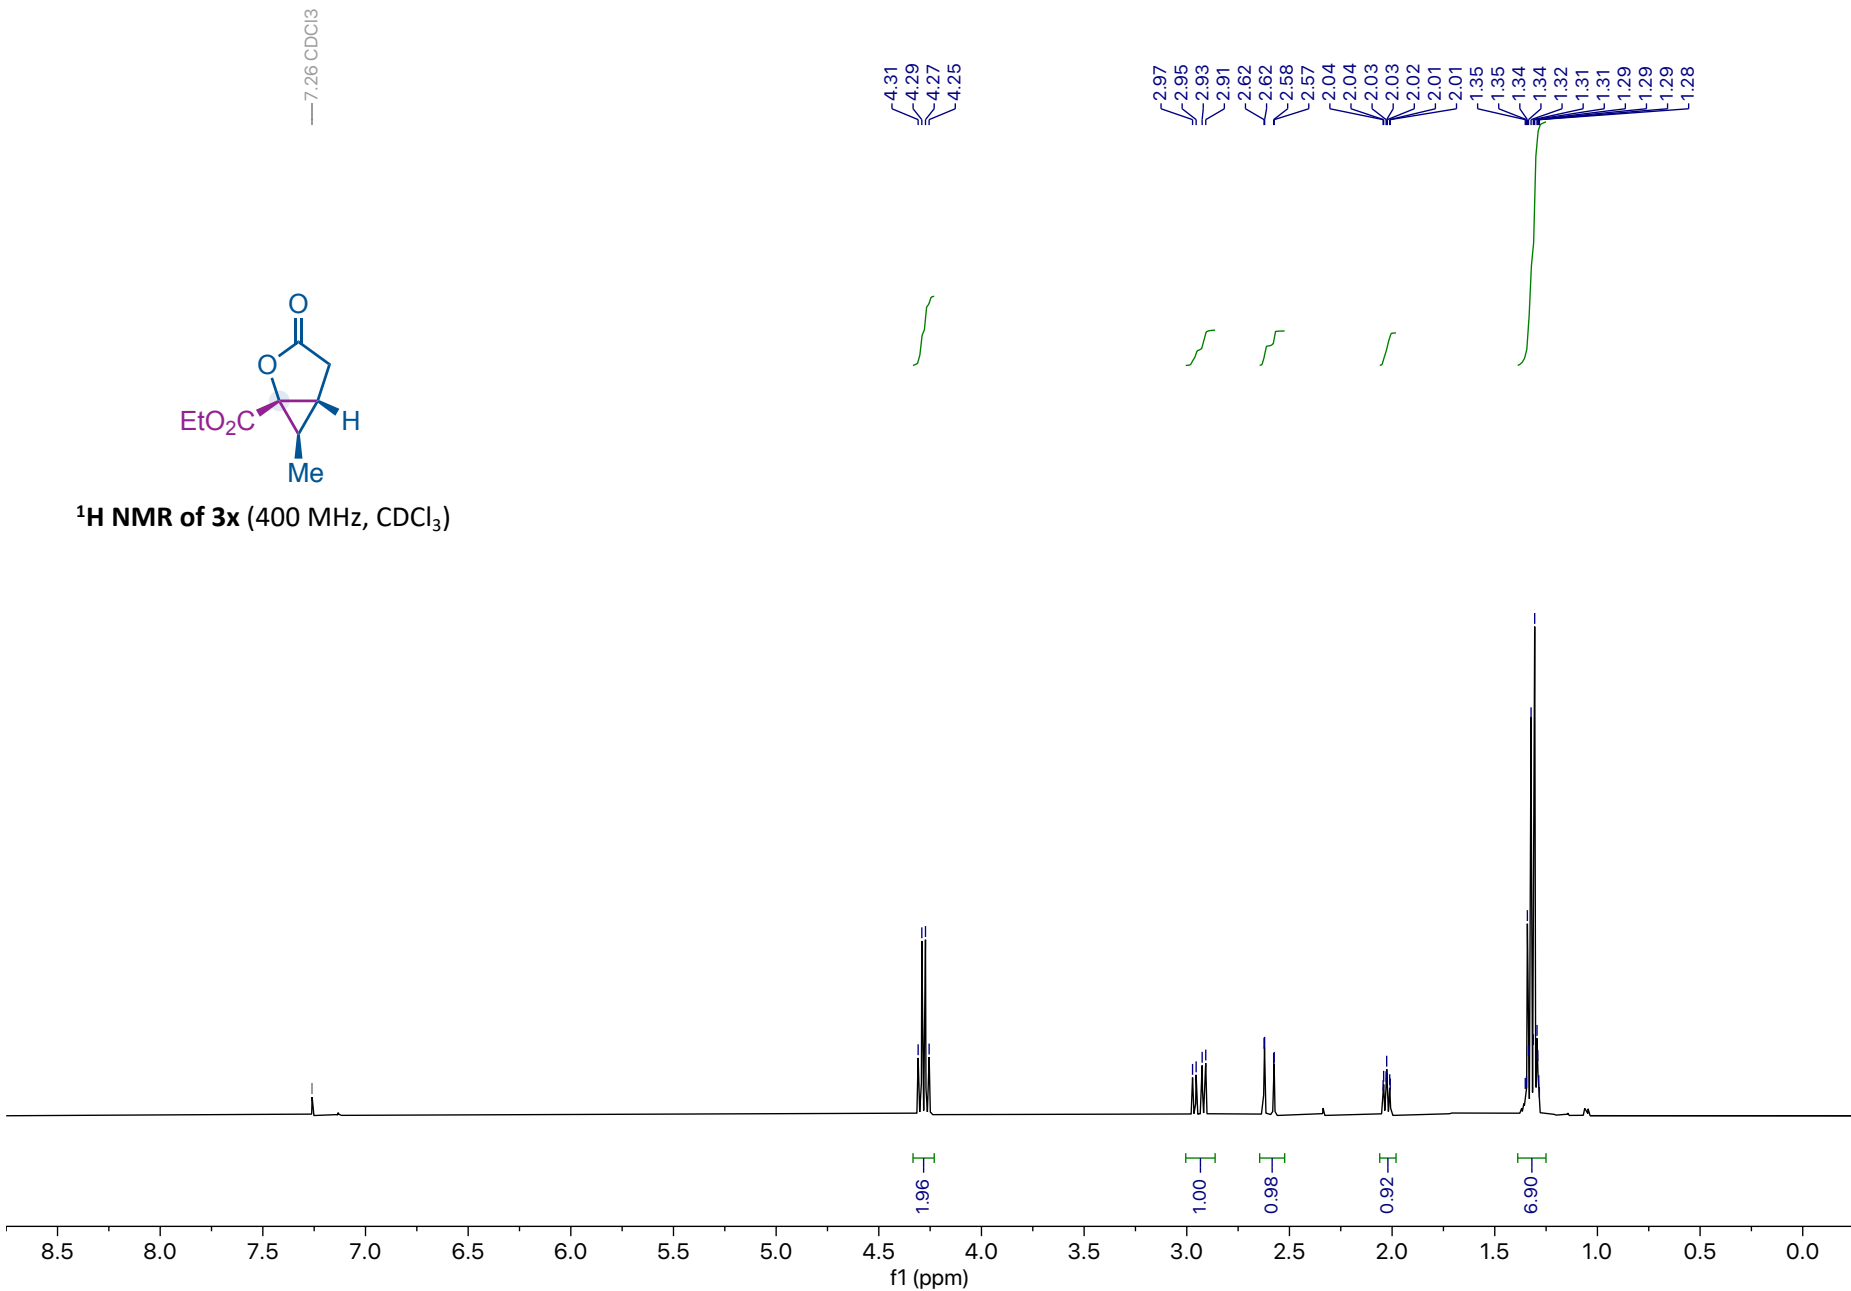



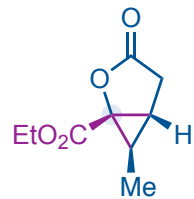

<sup>13</sup>C NMR of 3x (101 MHz, CDCl<sub>3</sub>)

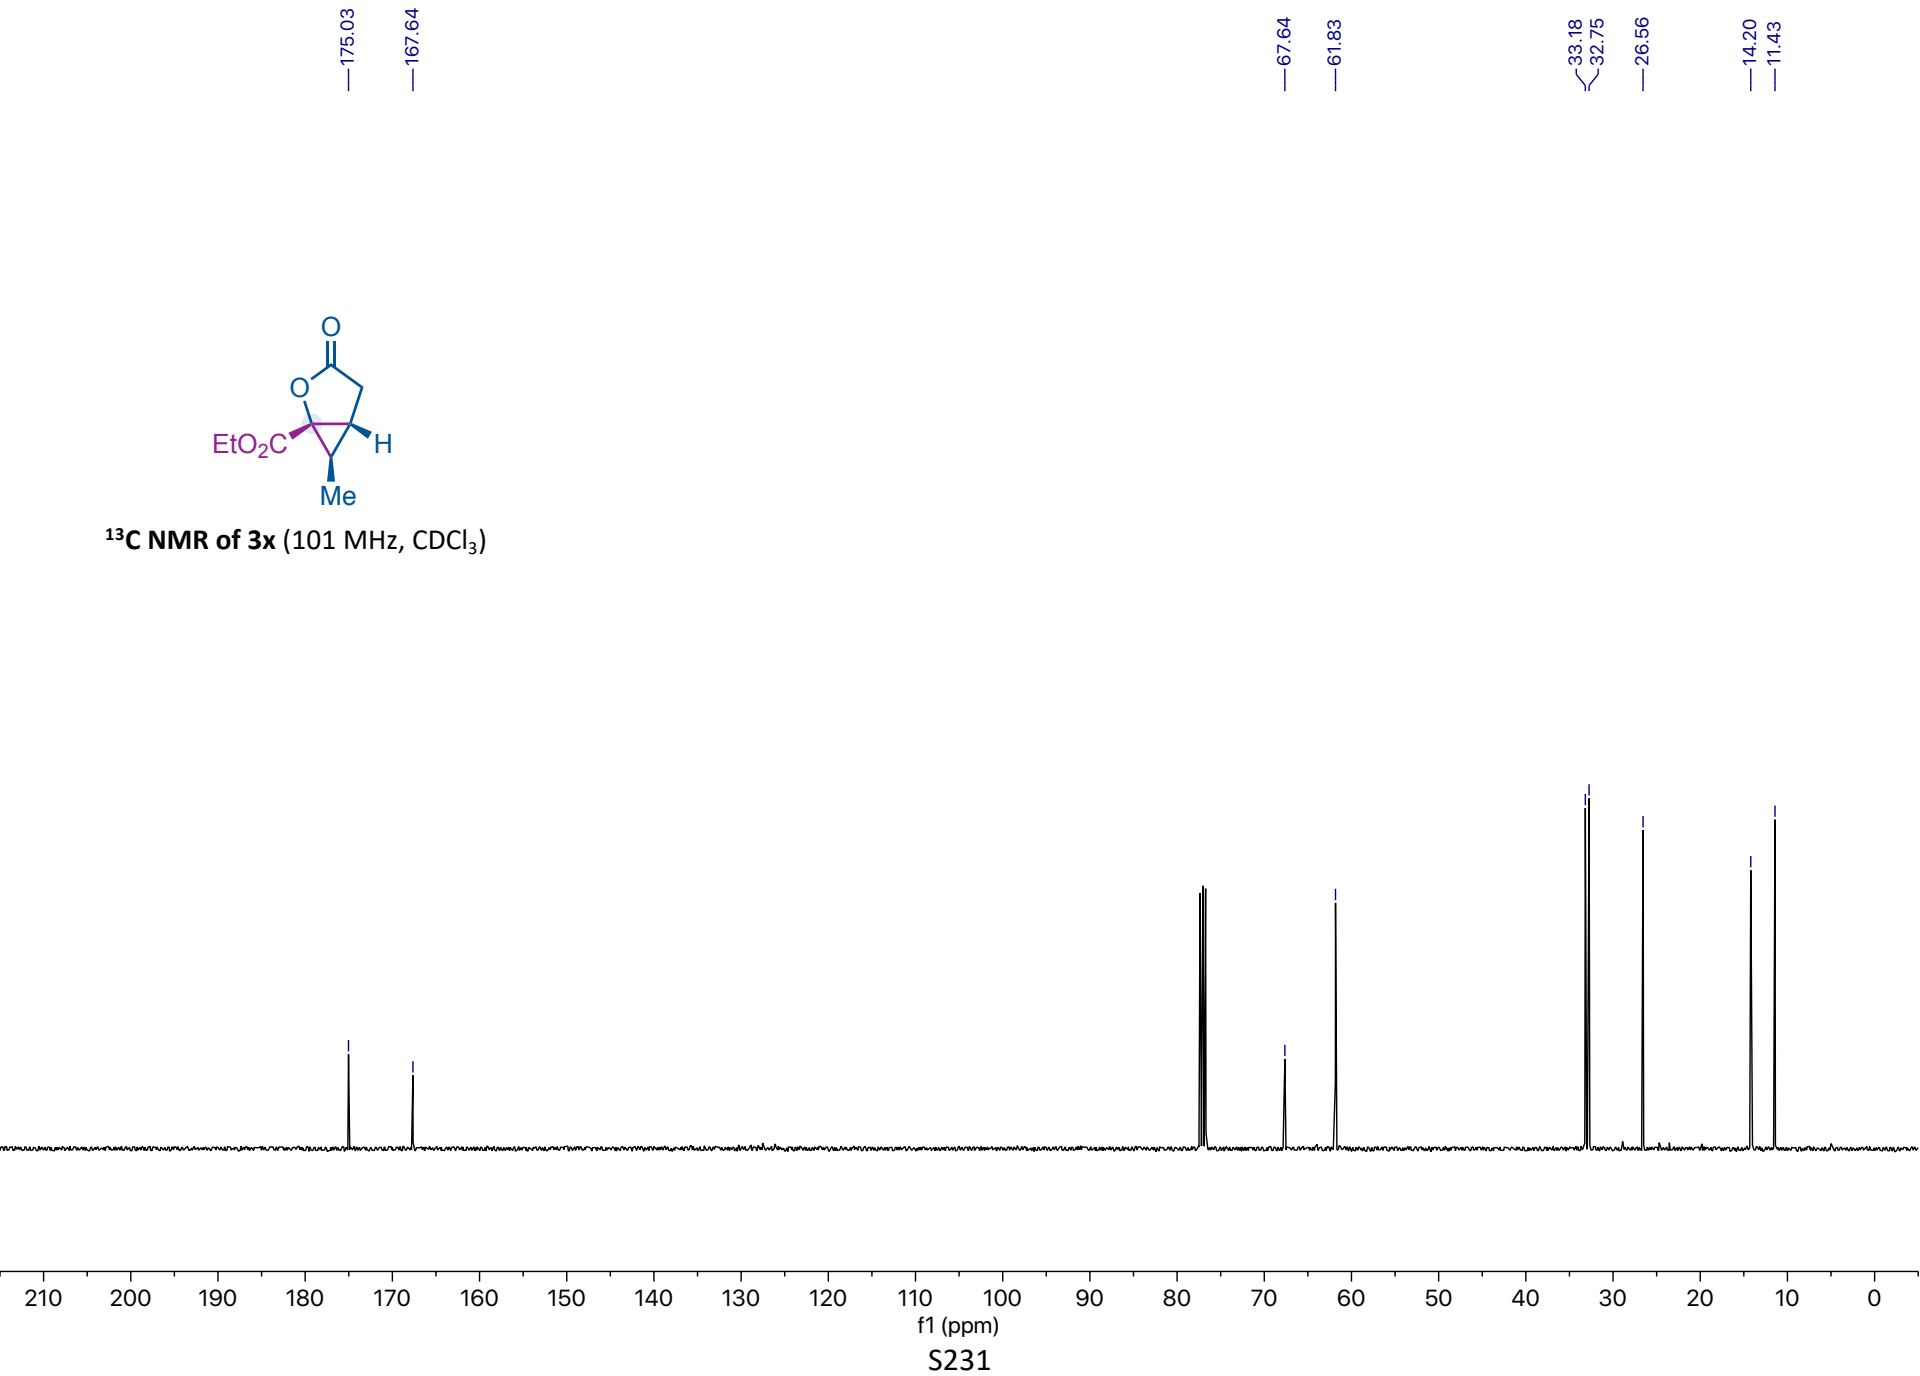

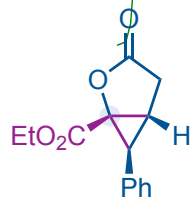

<sup>1</sup>H NMR of 3y (400 MHz, CDCl<sub>3</sub>)

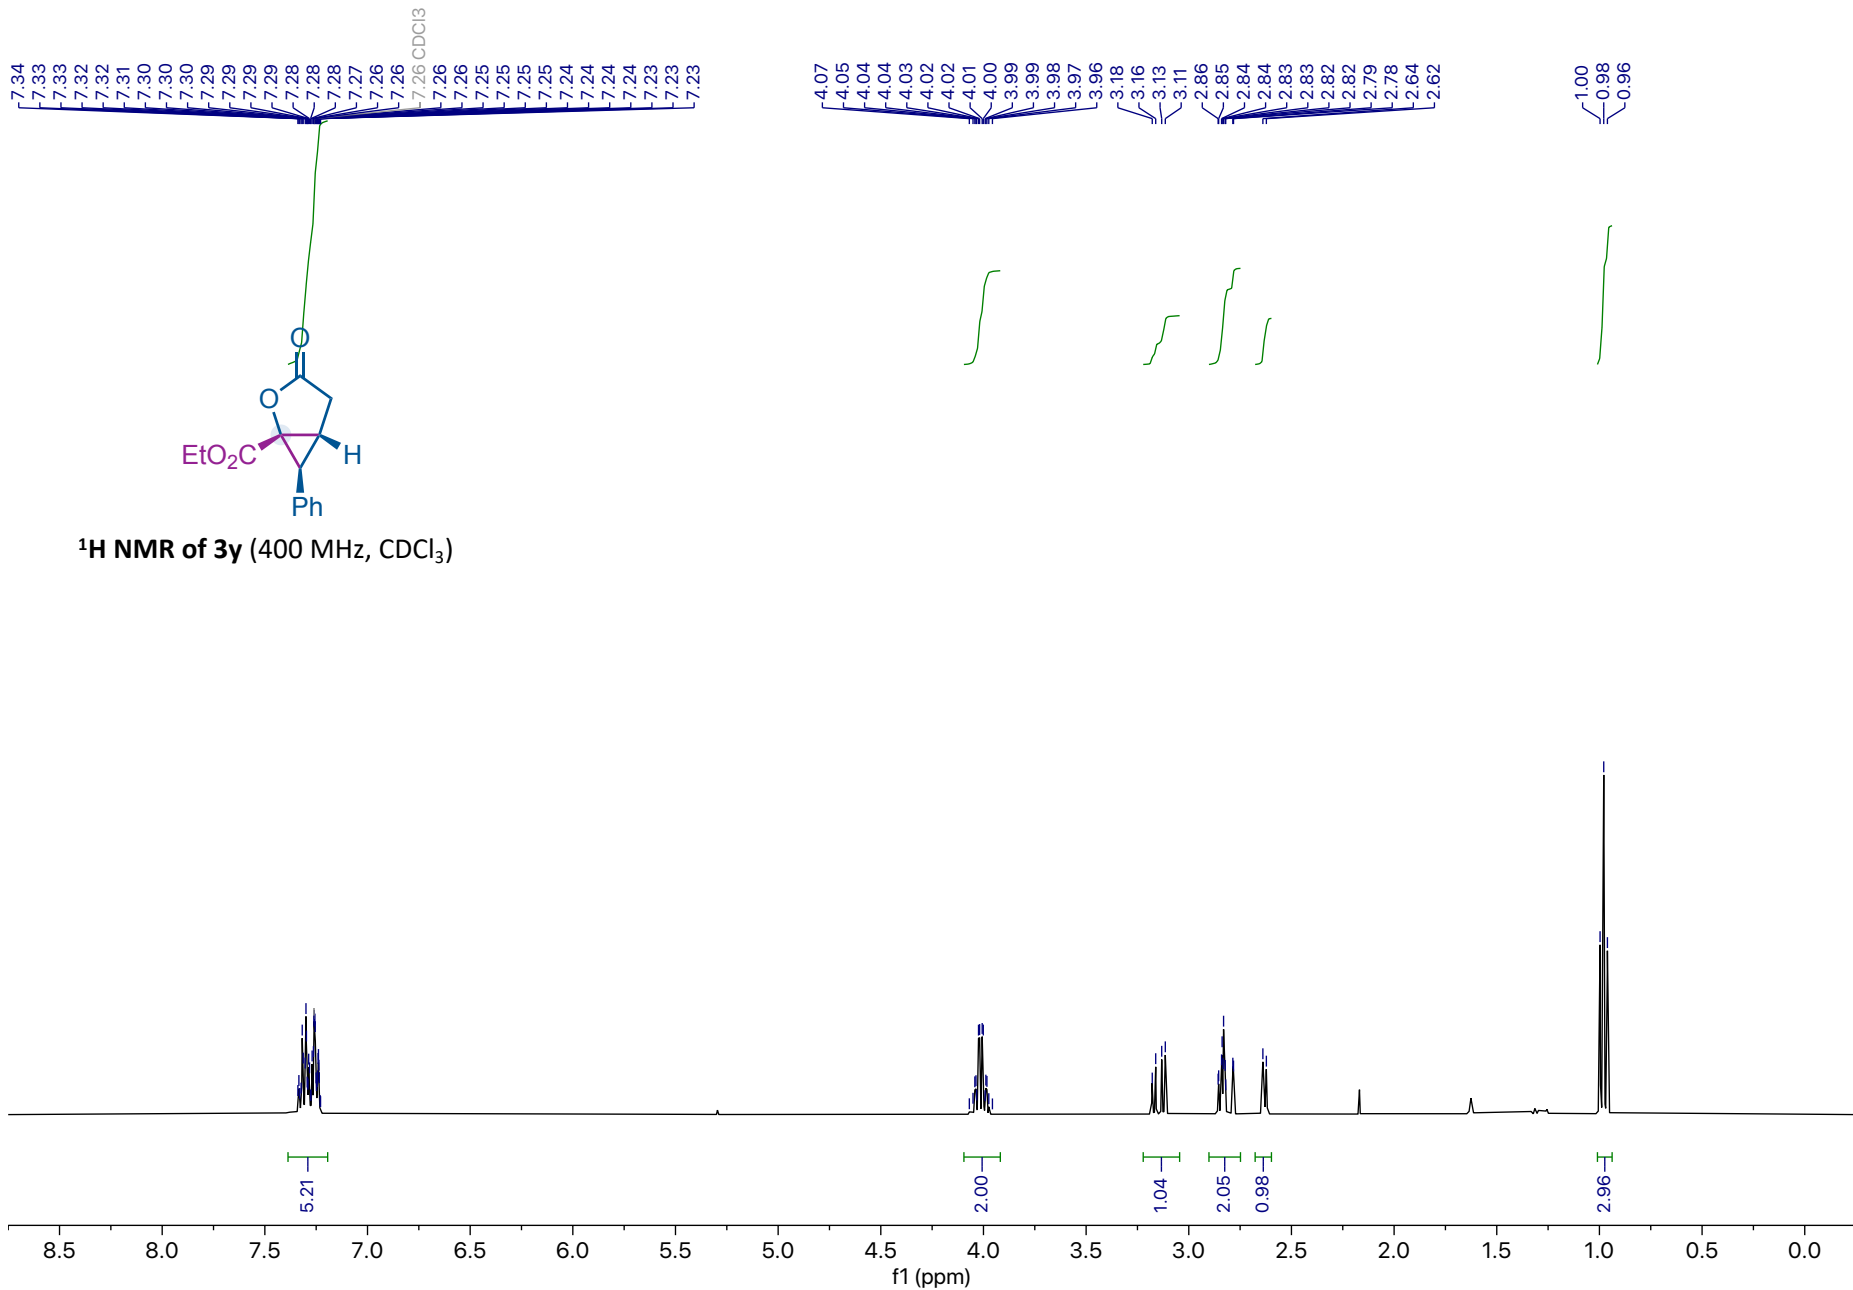

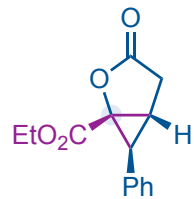

<sup>13</sup>C NMR of 3y (101 MHz, CDCl<sub>3</sub>)

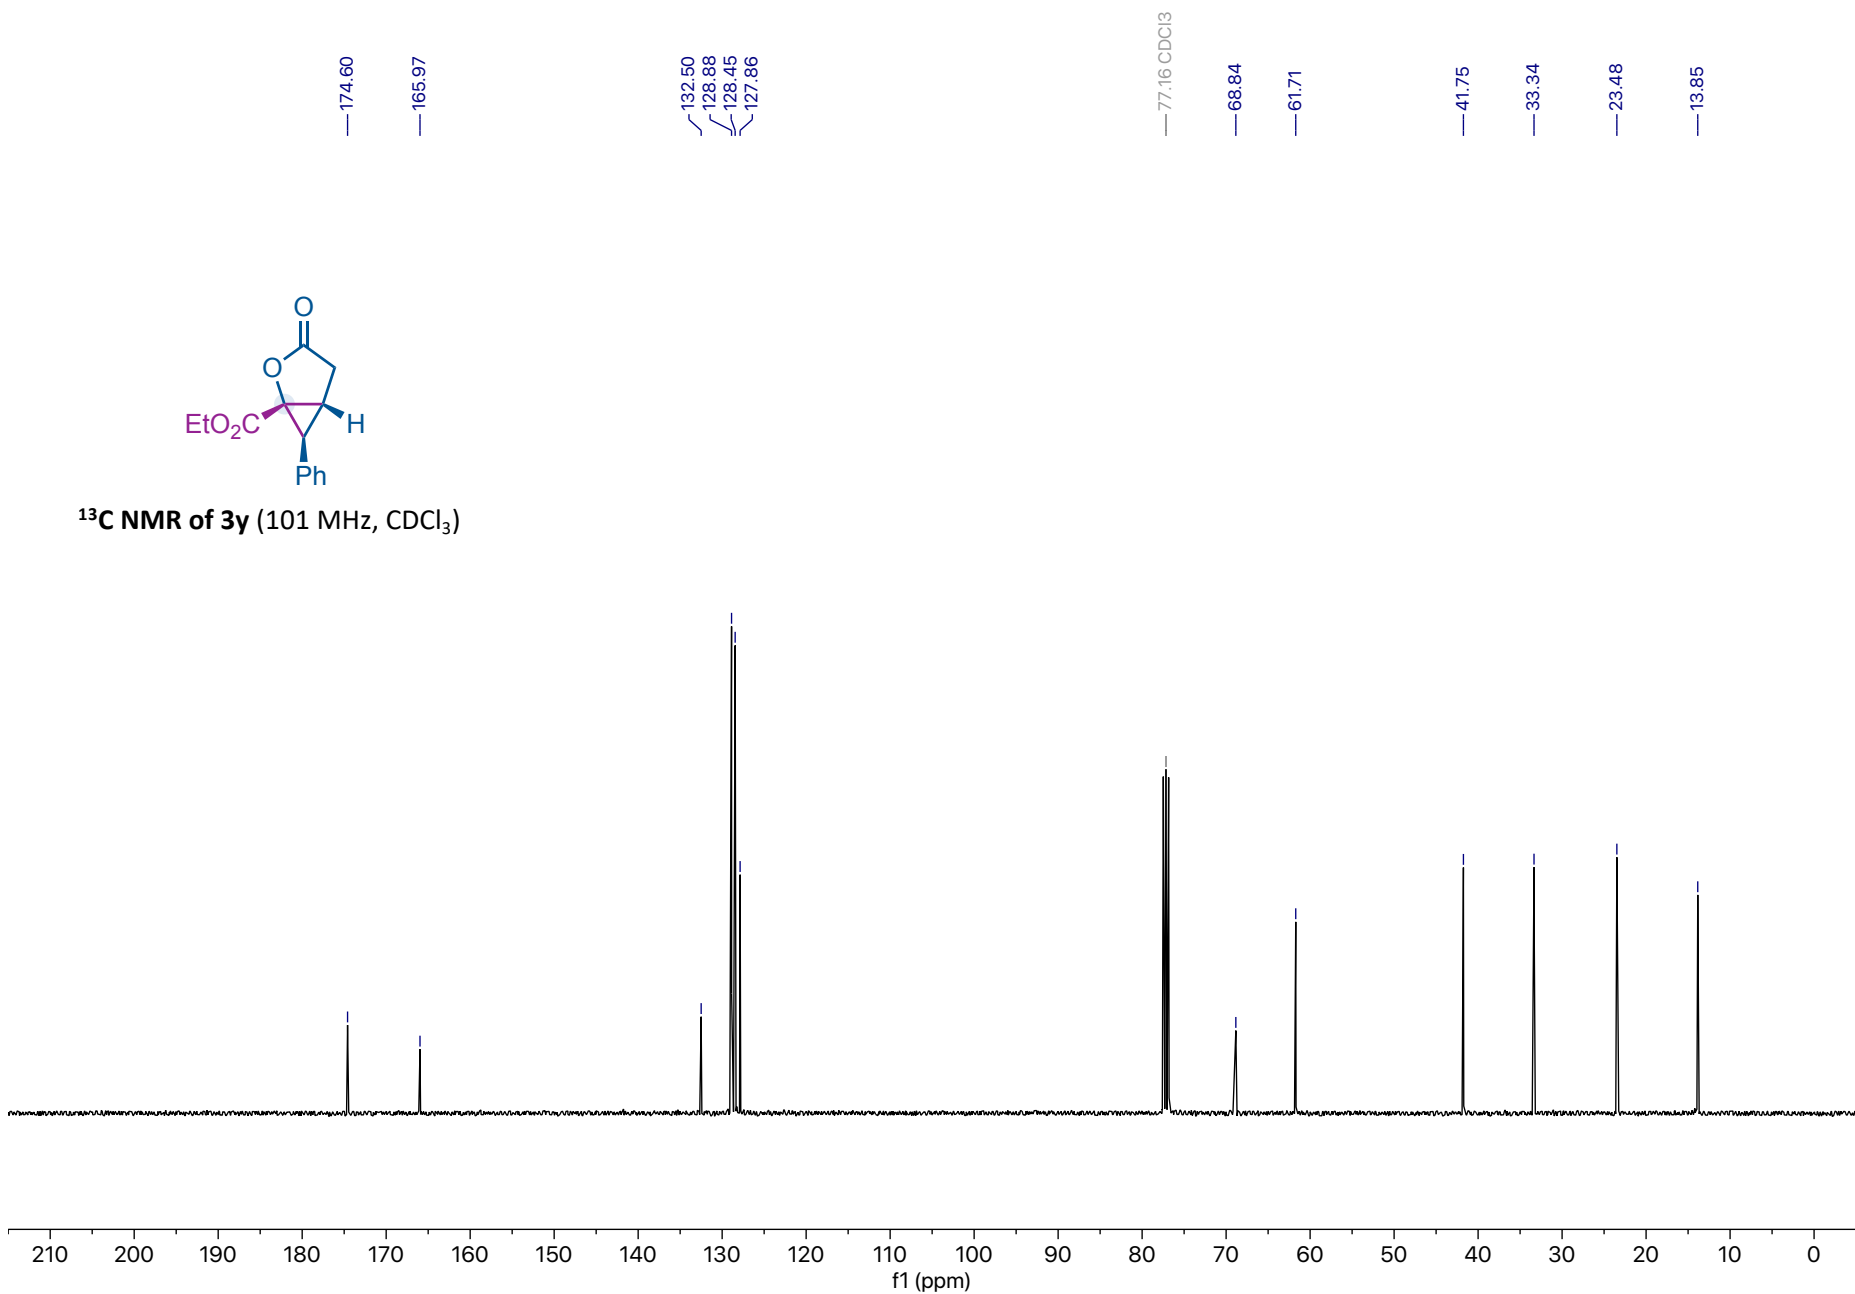

<sup>1</sup>H NMR of 5 (500 MHz, CDCl<sub>3</sub>)

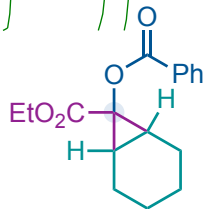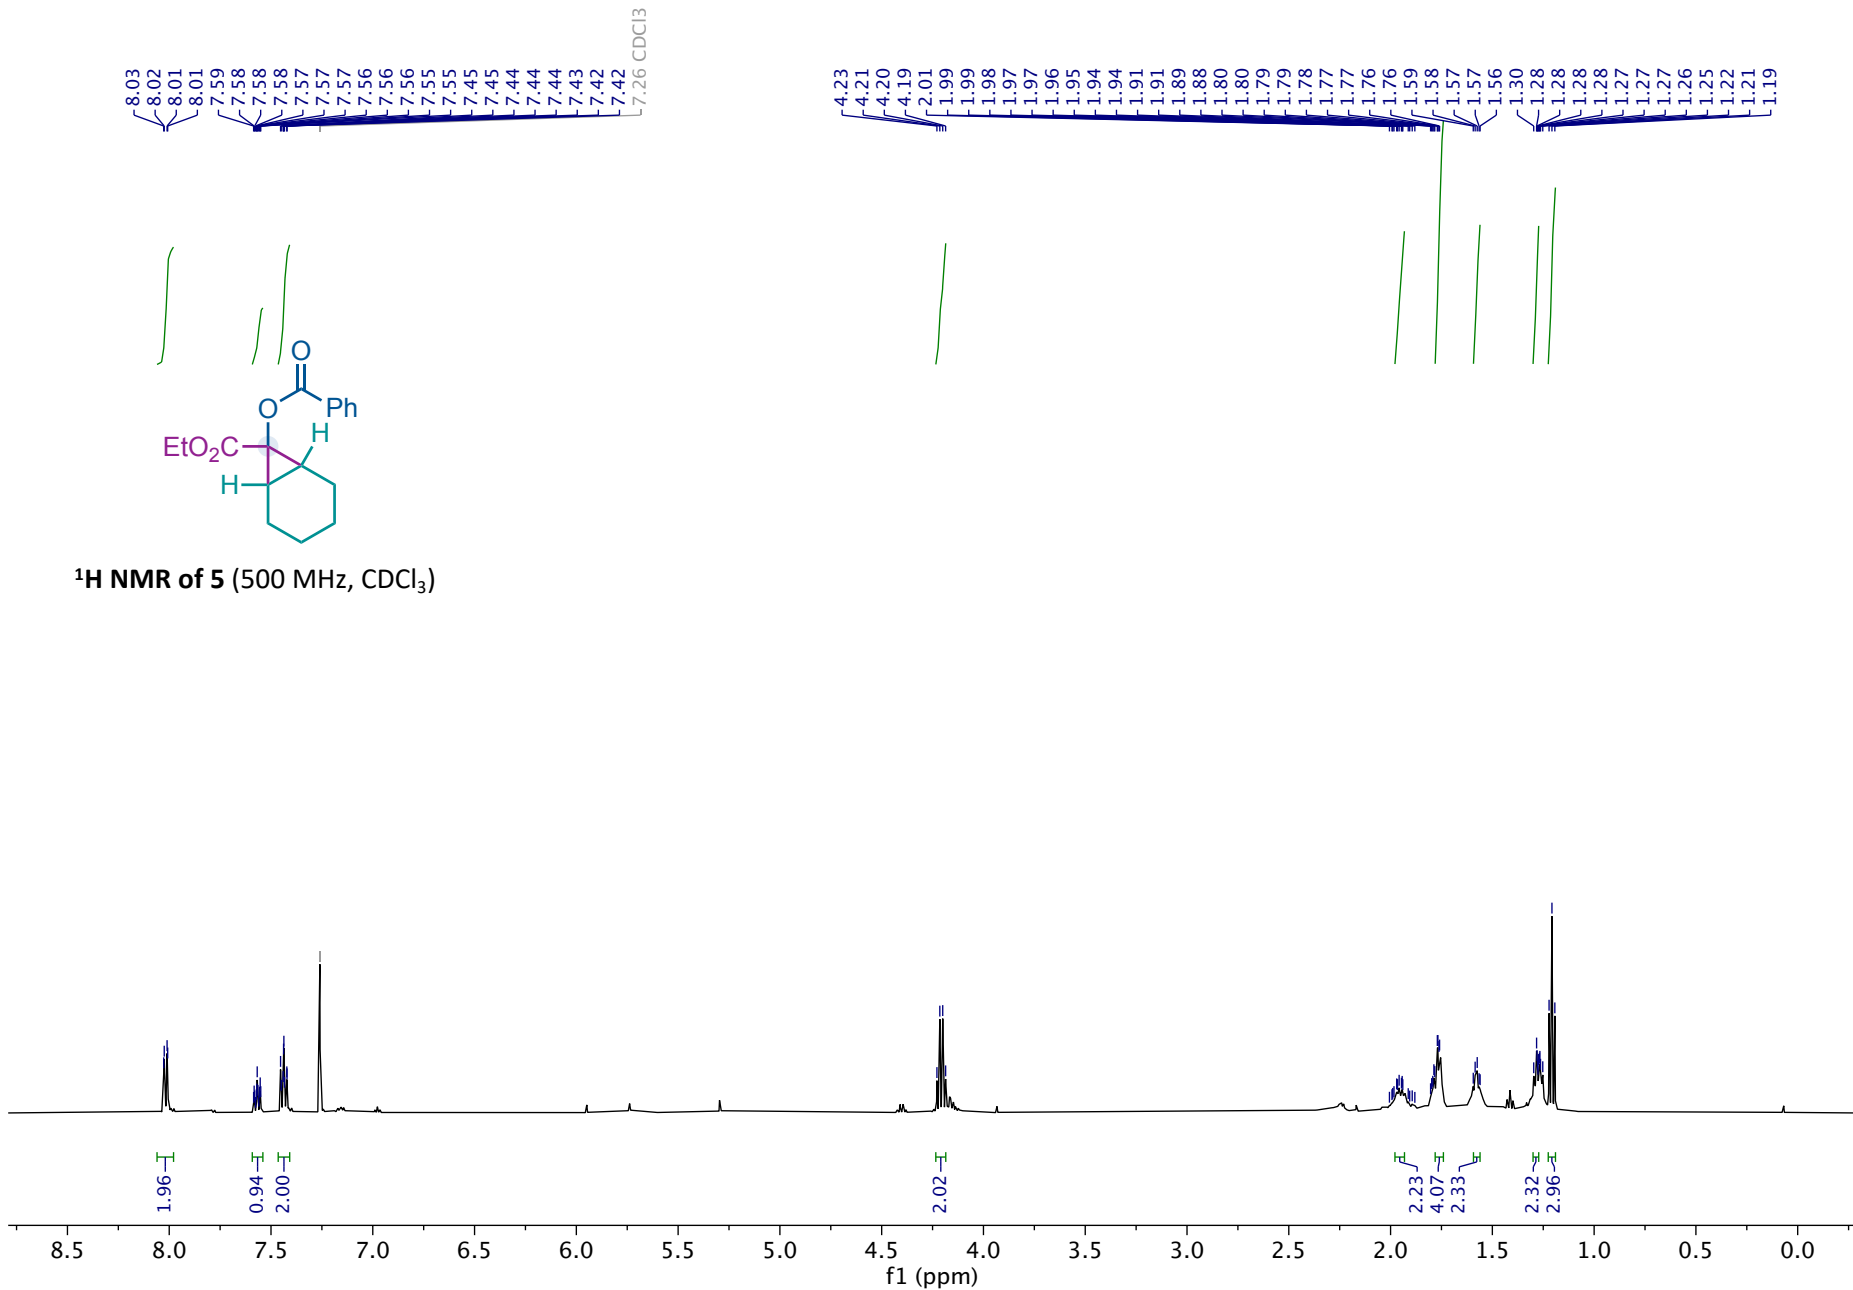

—168.77  
—166.66

—133.31  
—129.93  
—129.81  
—128.52

—77.16 CDCl3

—63.47  
—61.05

—25.67  
—20.57  
—17.35  
—14.35

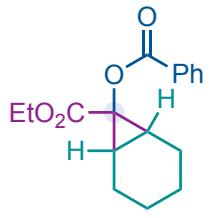

**<sup>13</sup>C NMR of 5** (126 MHz, CDCl<sub>3</sub>)

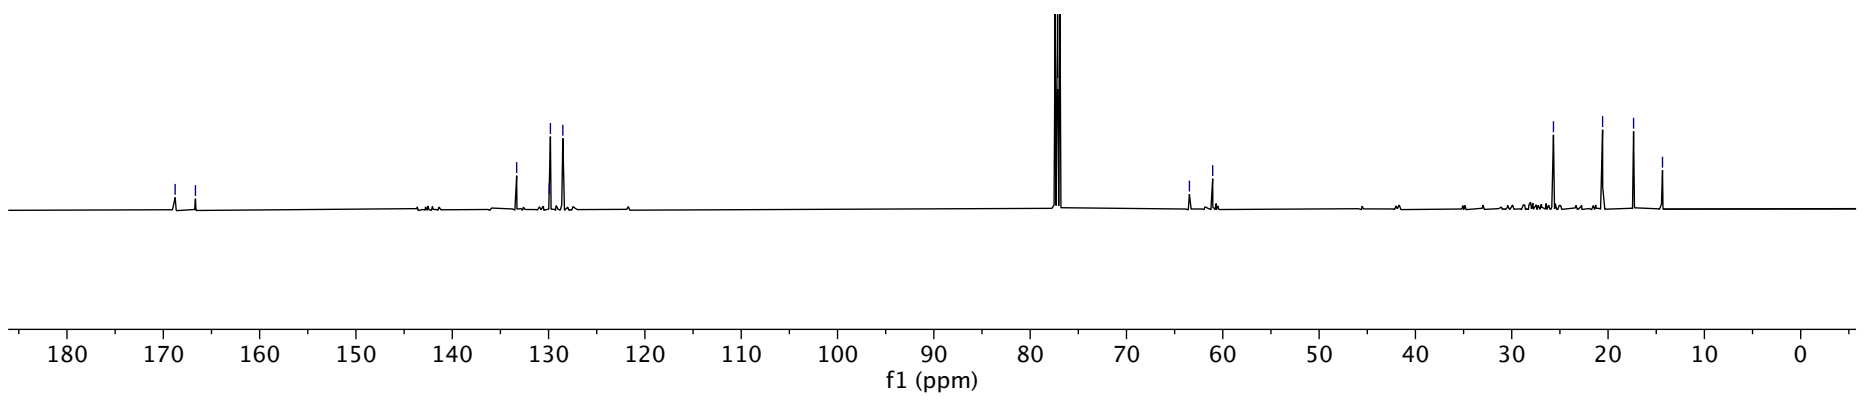



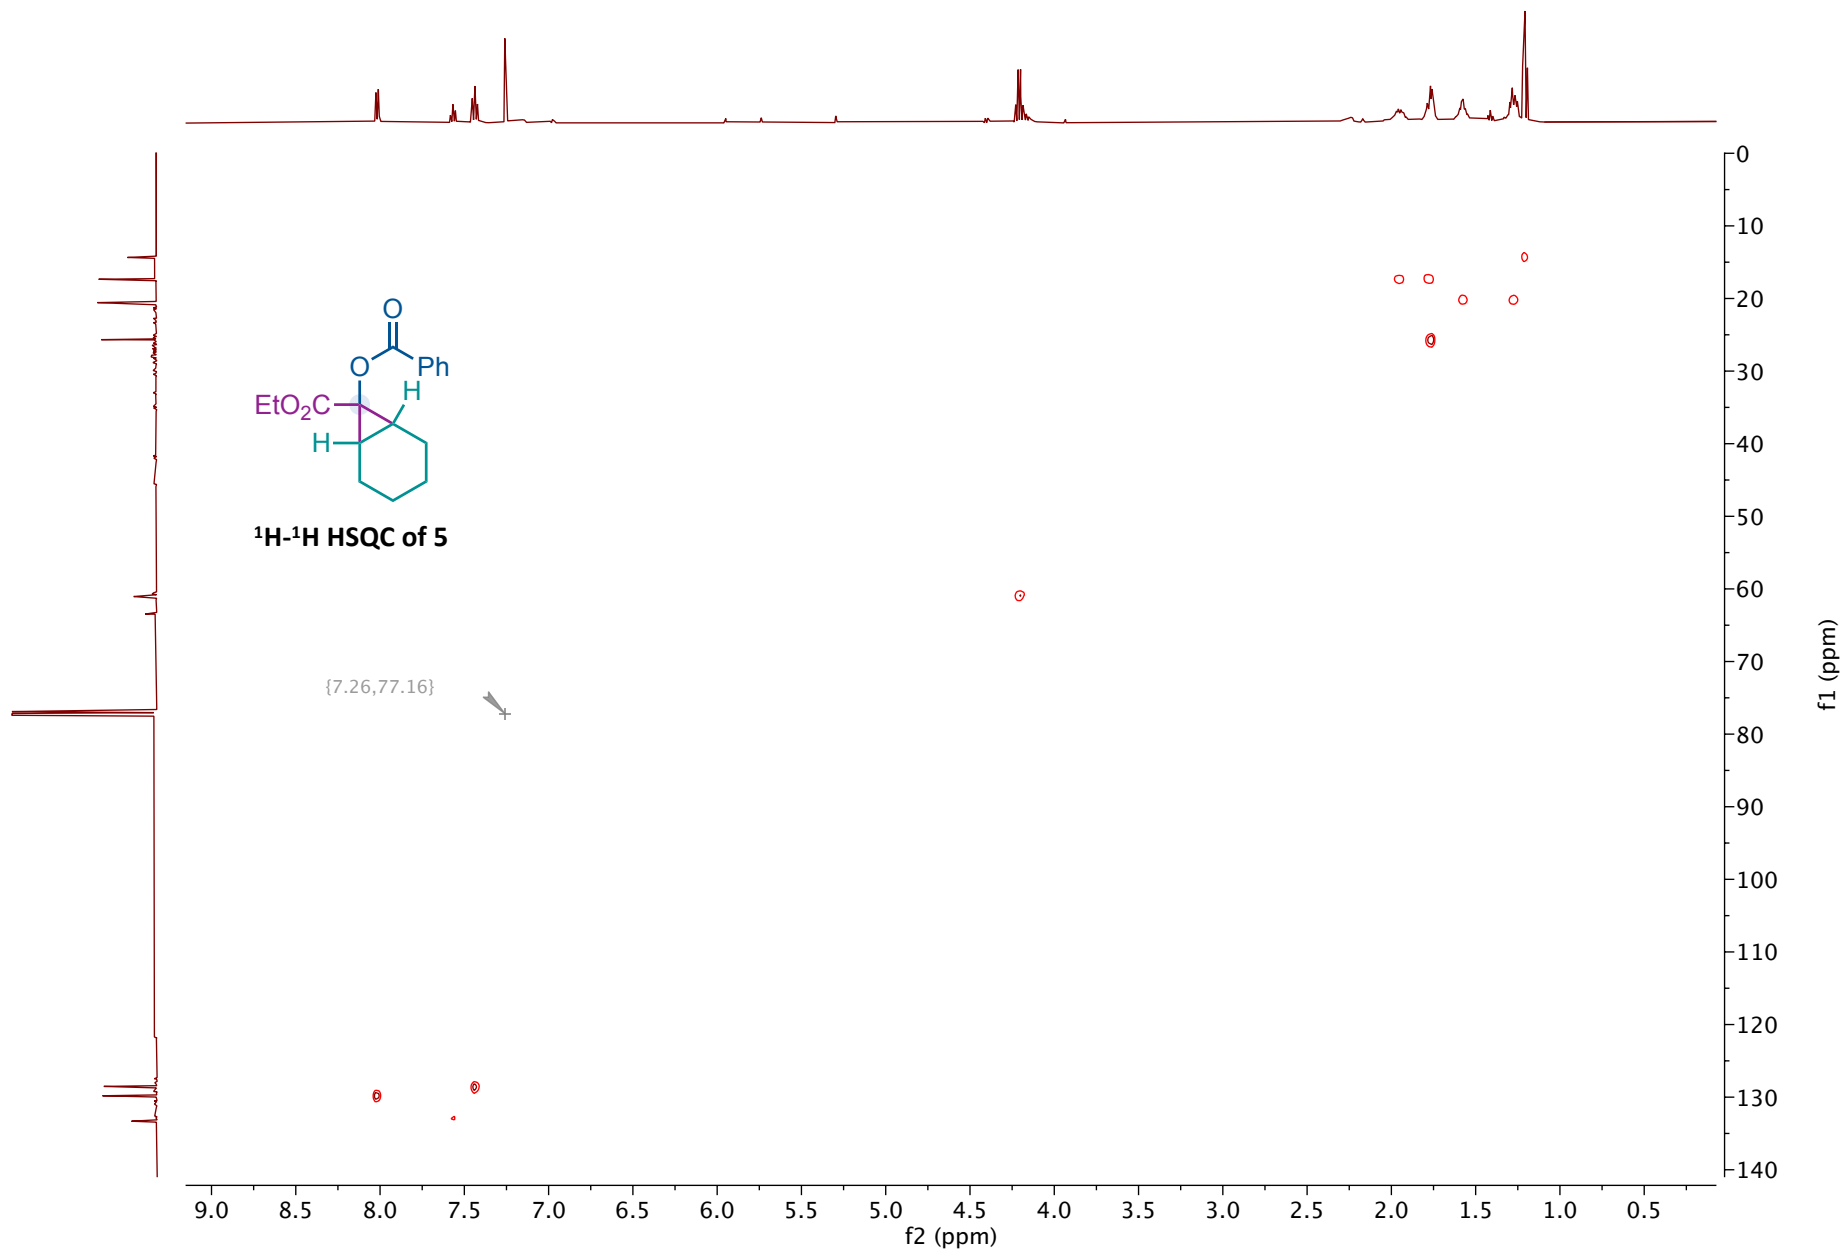

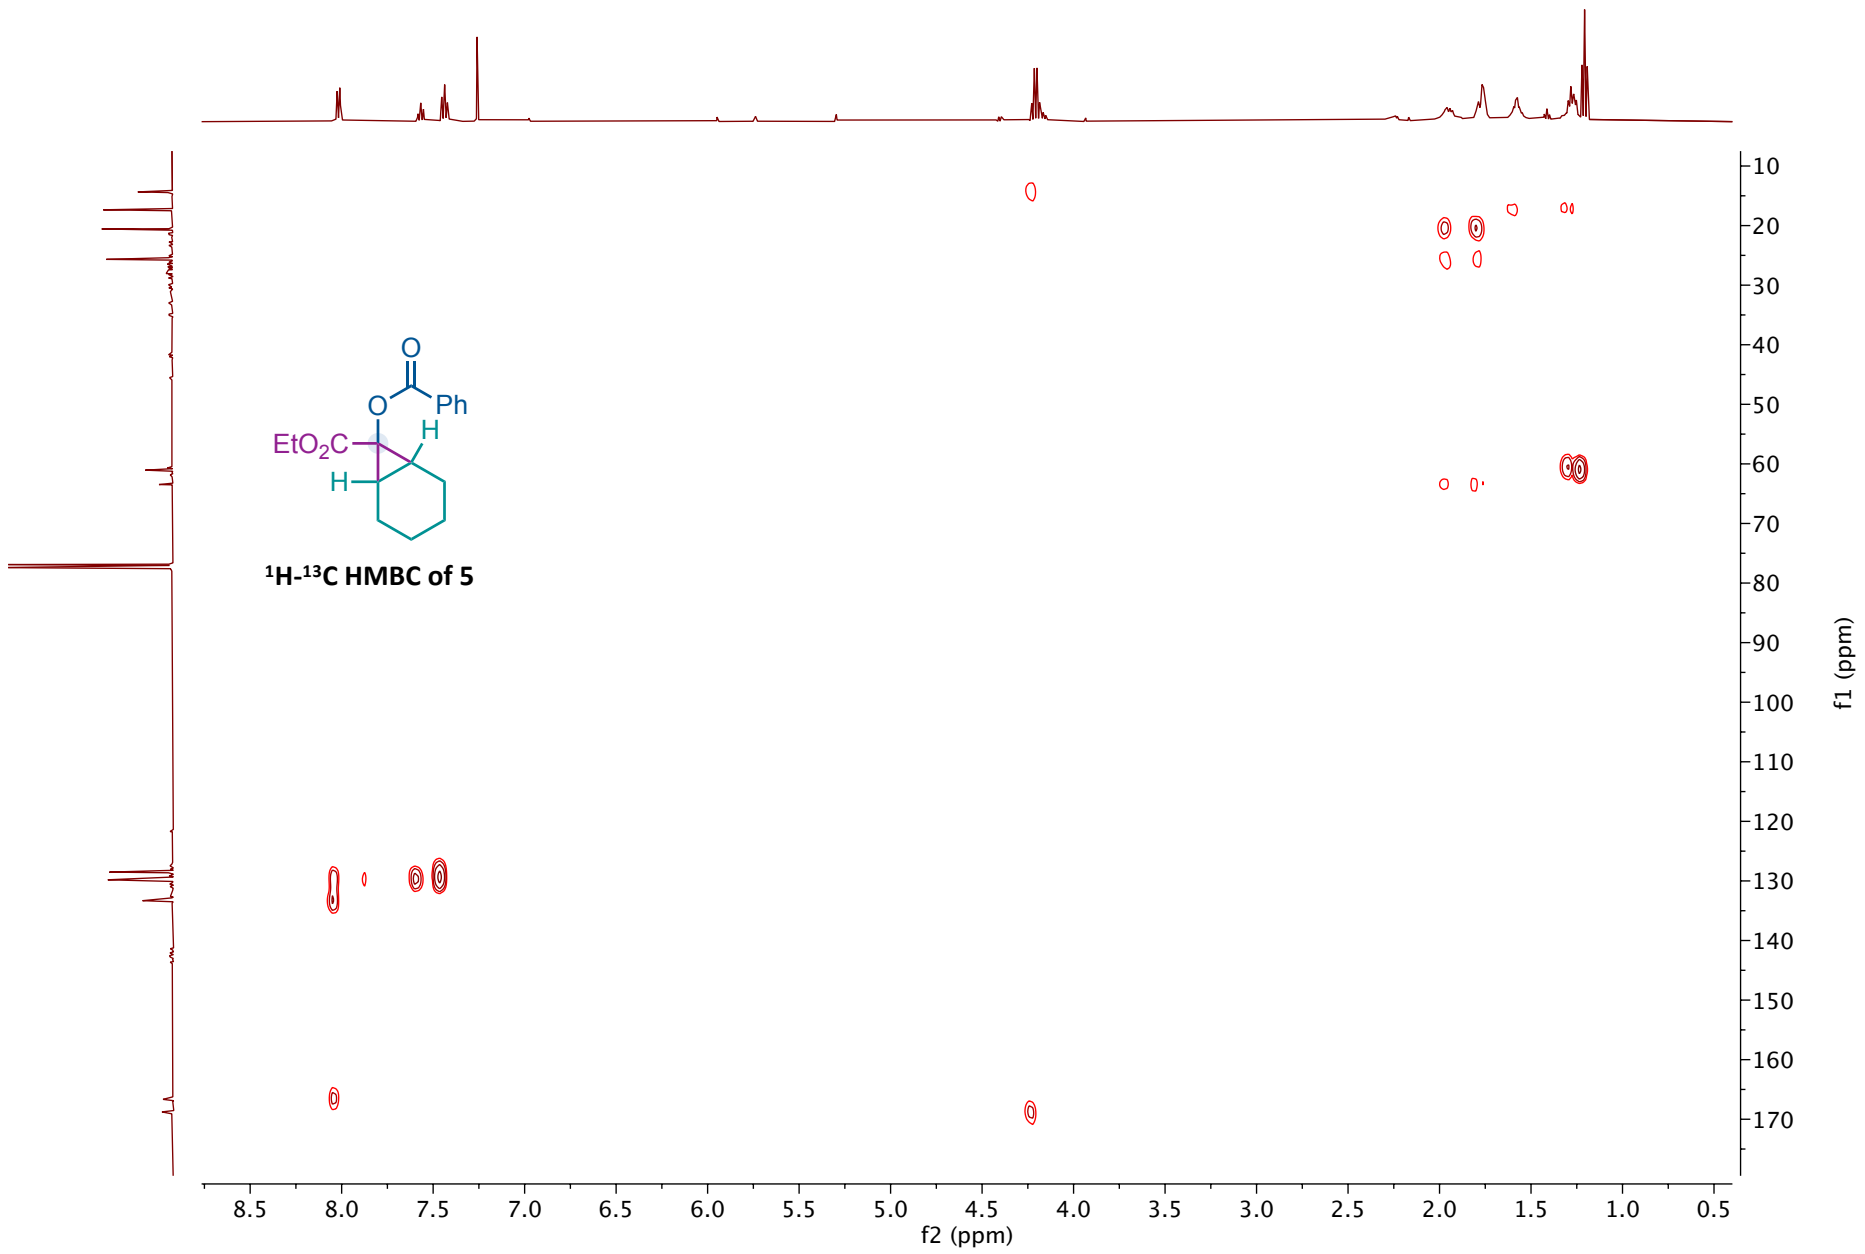



7.41  
7.41  
7.41  
7.40  
7.40  
7.39  
7.39  
7.38  
7.38  
7.37  
7.37  
7.37  
7.36  
7.36  
7.33  
7.33  
7.32  
7.32  
7.31  
7.31  
7.31  
7.30  
7.29  
7.29  
7.29  
7.26 CDCl3  
7.25  
7.24  
7.24  
7.23  
7.23  
7.22  
7.22

4.31  
4.31  
4.30  
4.29  
4.29  
4.28  
4.28  
4.26  
4.26  
4.25  
4.25  
4.24  
4.24  
4.23  
2.75  
2.74  
2.72  
2.72  
2.71  
2.70  
2.69  
2.68  
2.67  
2.54  
2.52  
2.51  
2.49  
2.15  
2.13  
2.12  
2.11  
2.10  
2.09  
1.90  
1.89  
1.88  
1.86  
1.39  
1.39  
1.37  
1.37  
1.37  
1.35  
1.35  
1.34  
1.34  
1.32  
1.30  
0.98  
0.92

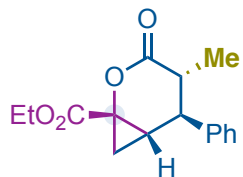

<sup>1</sup>H NMR of 6 (400 MHz, CDCl<sub>3</sub>)

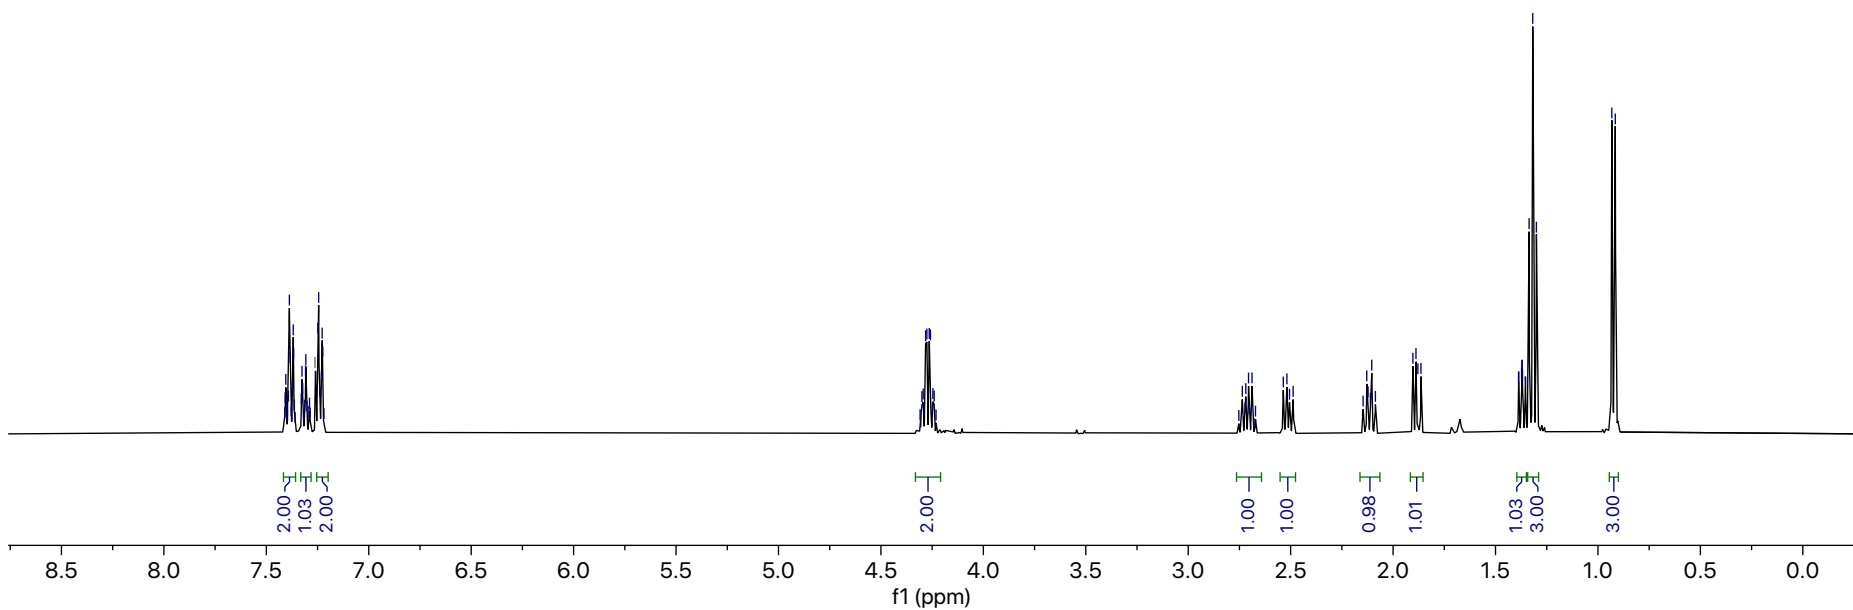

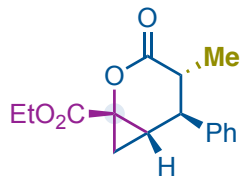

<sup>13</sup>C NMR of 6 (101 MHz, CDCl<sub>3</sub>)

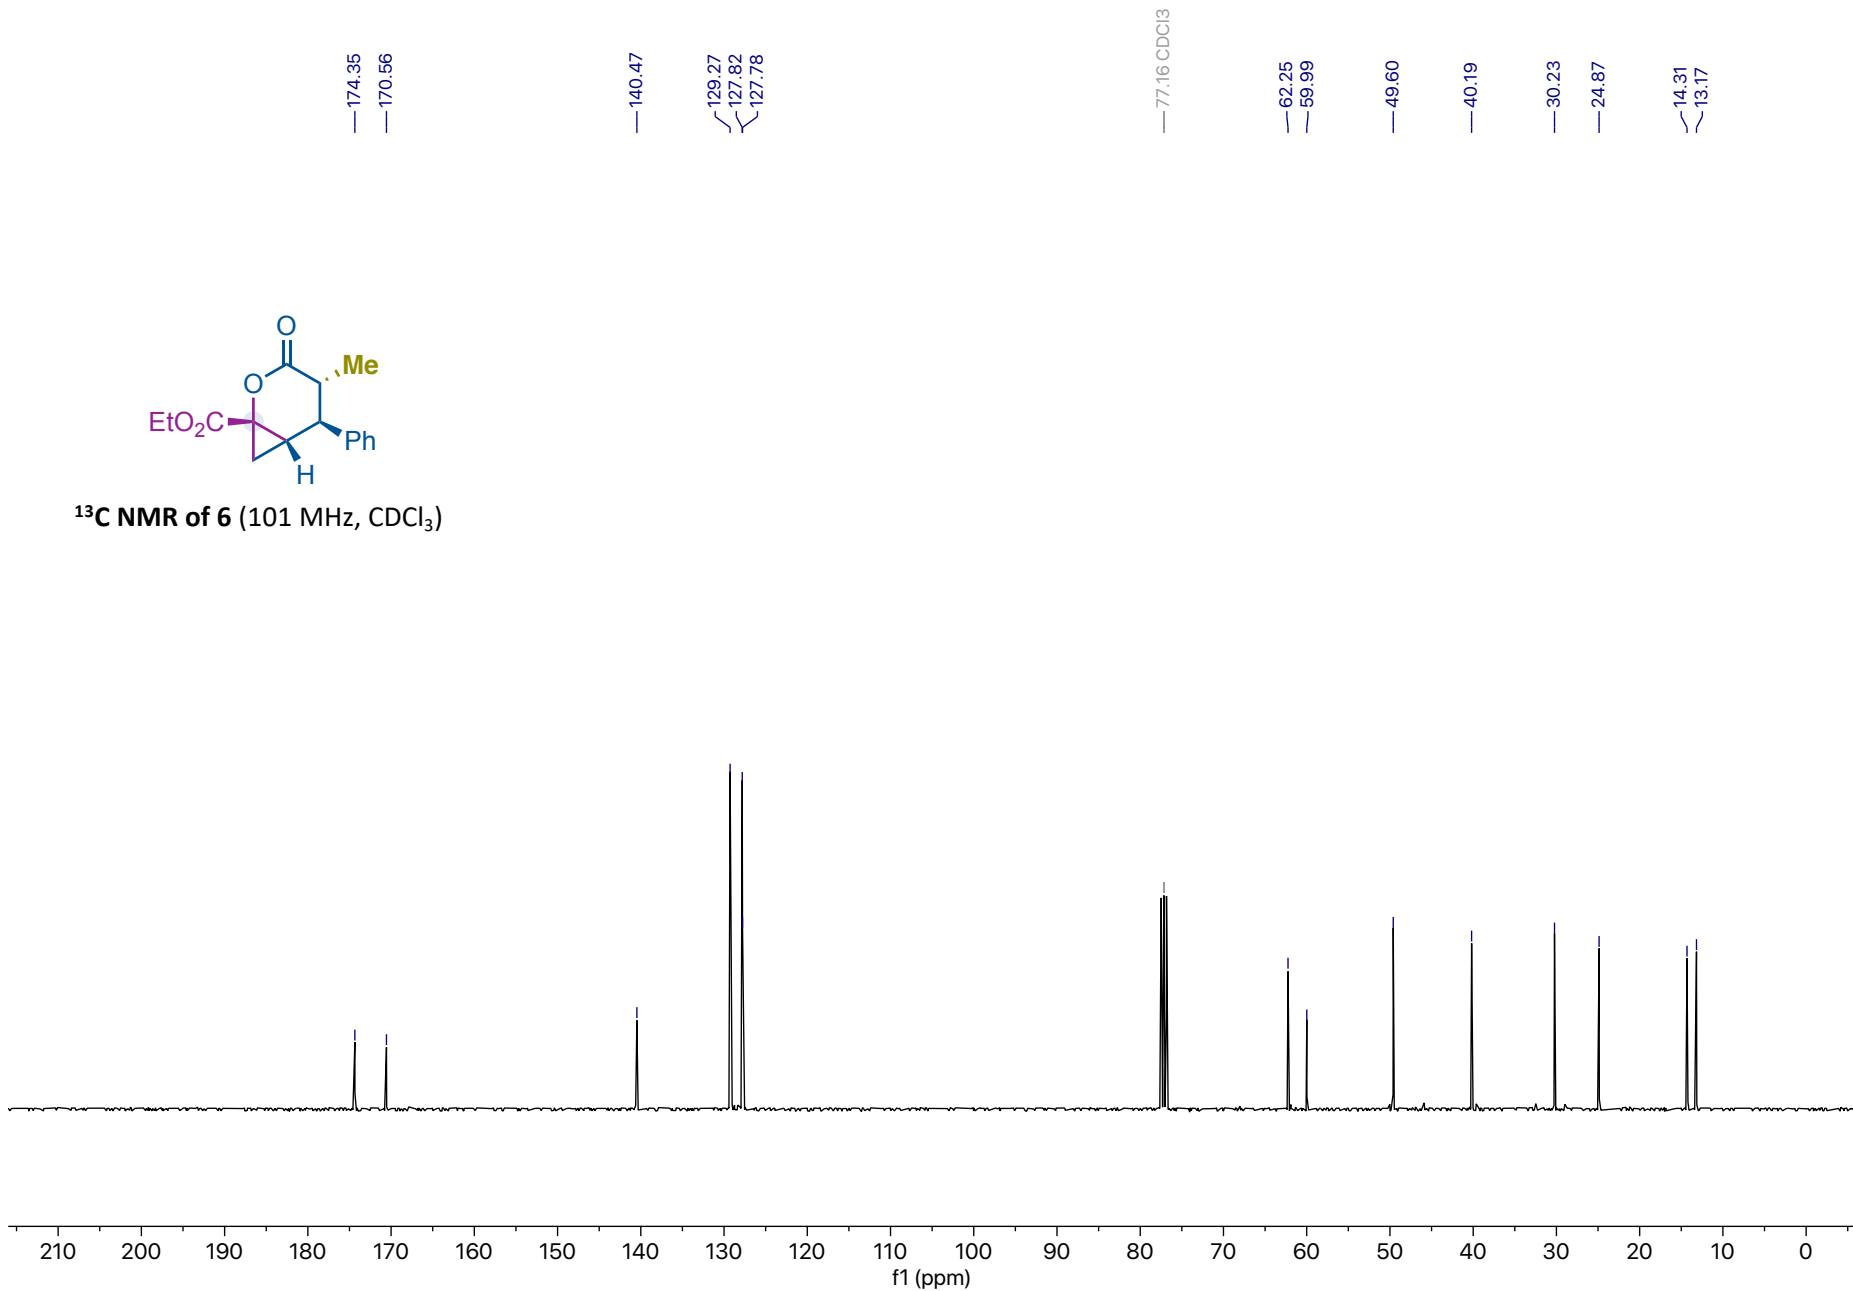

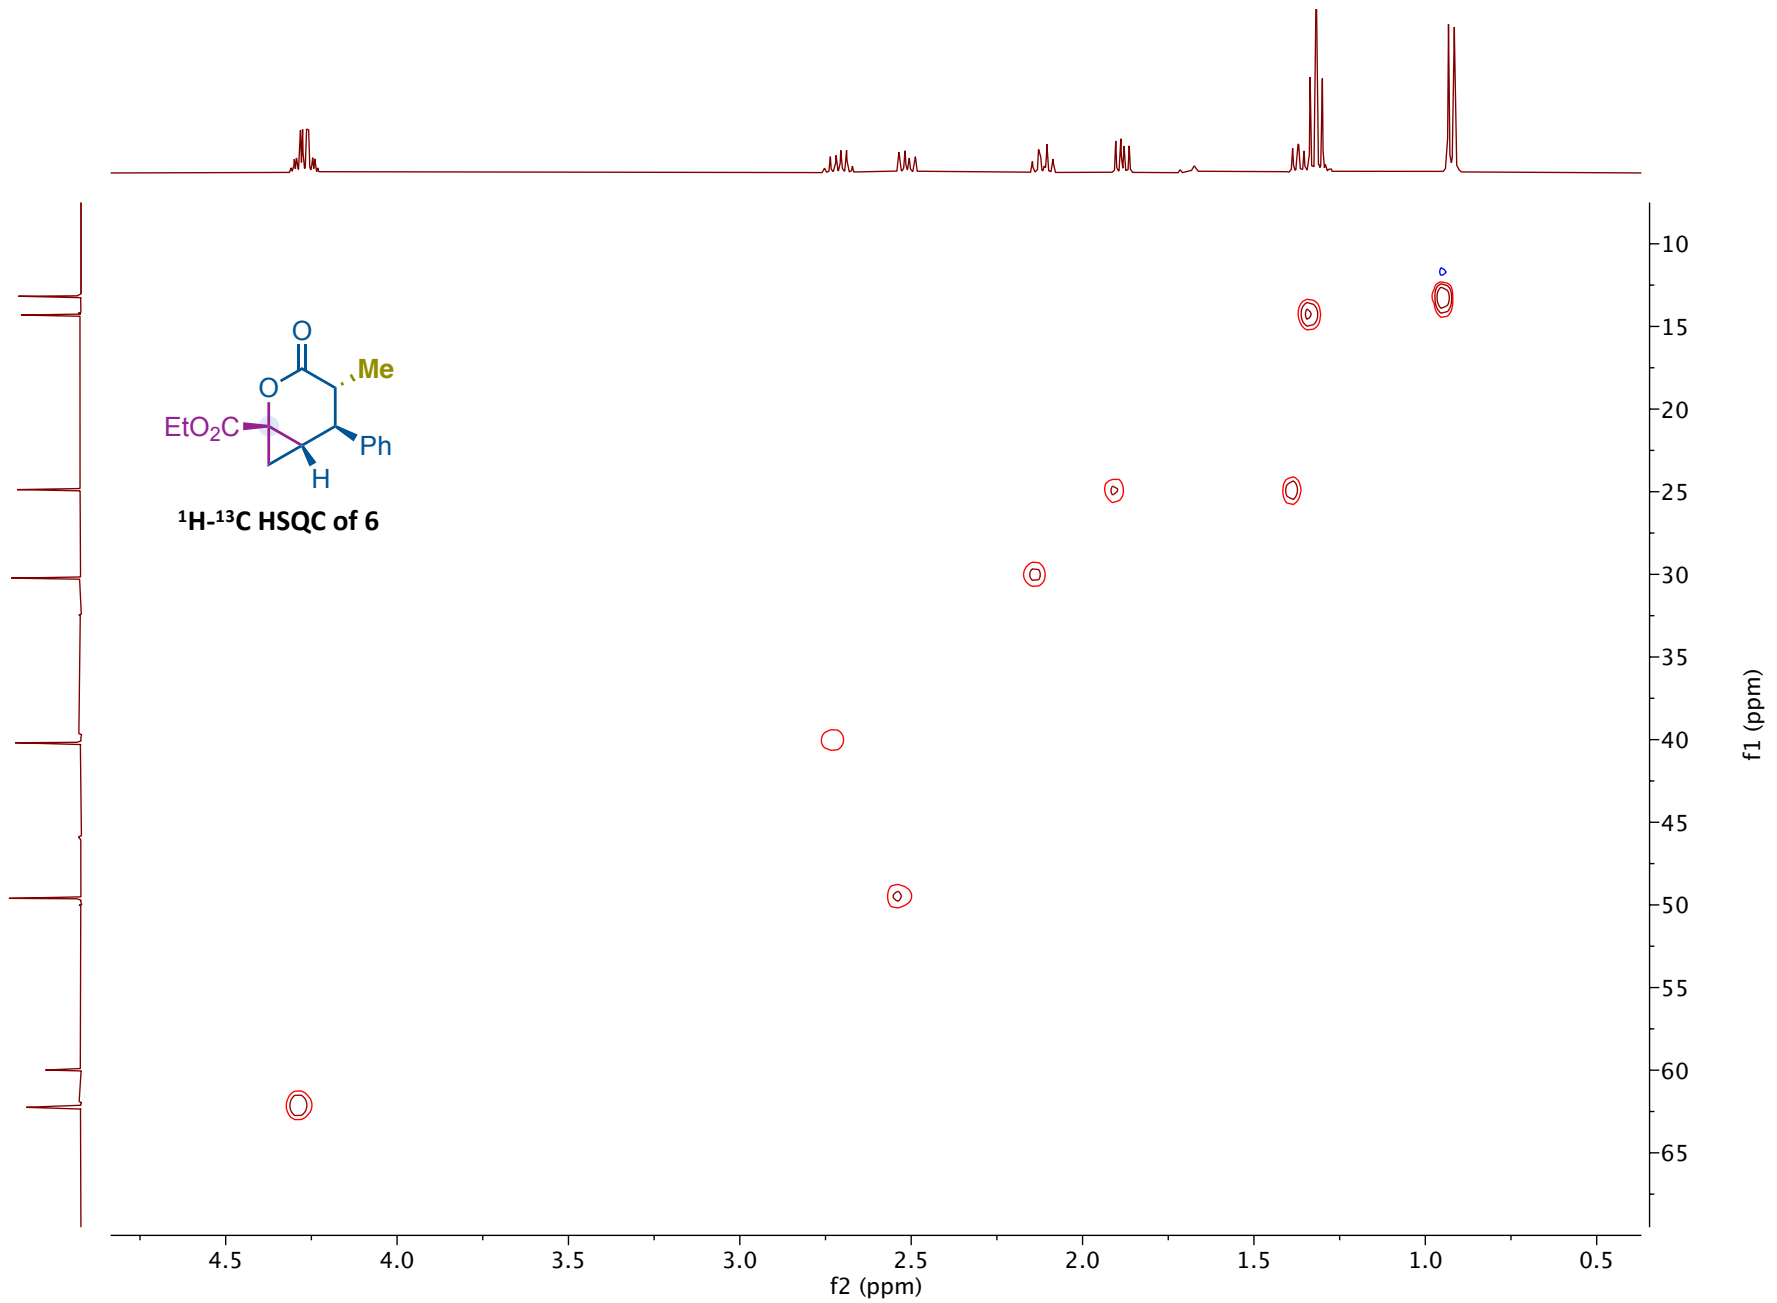

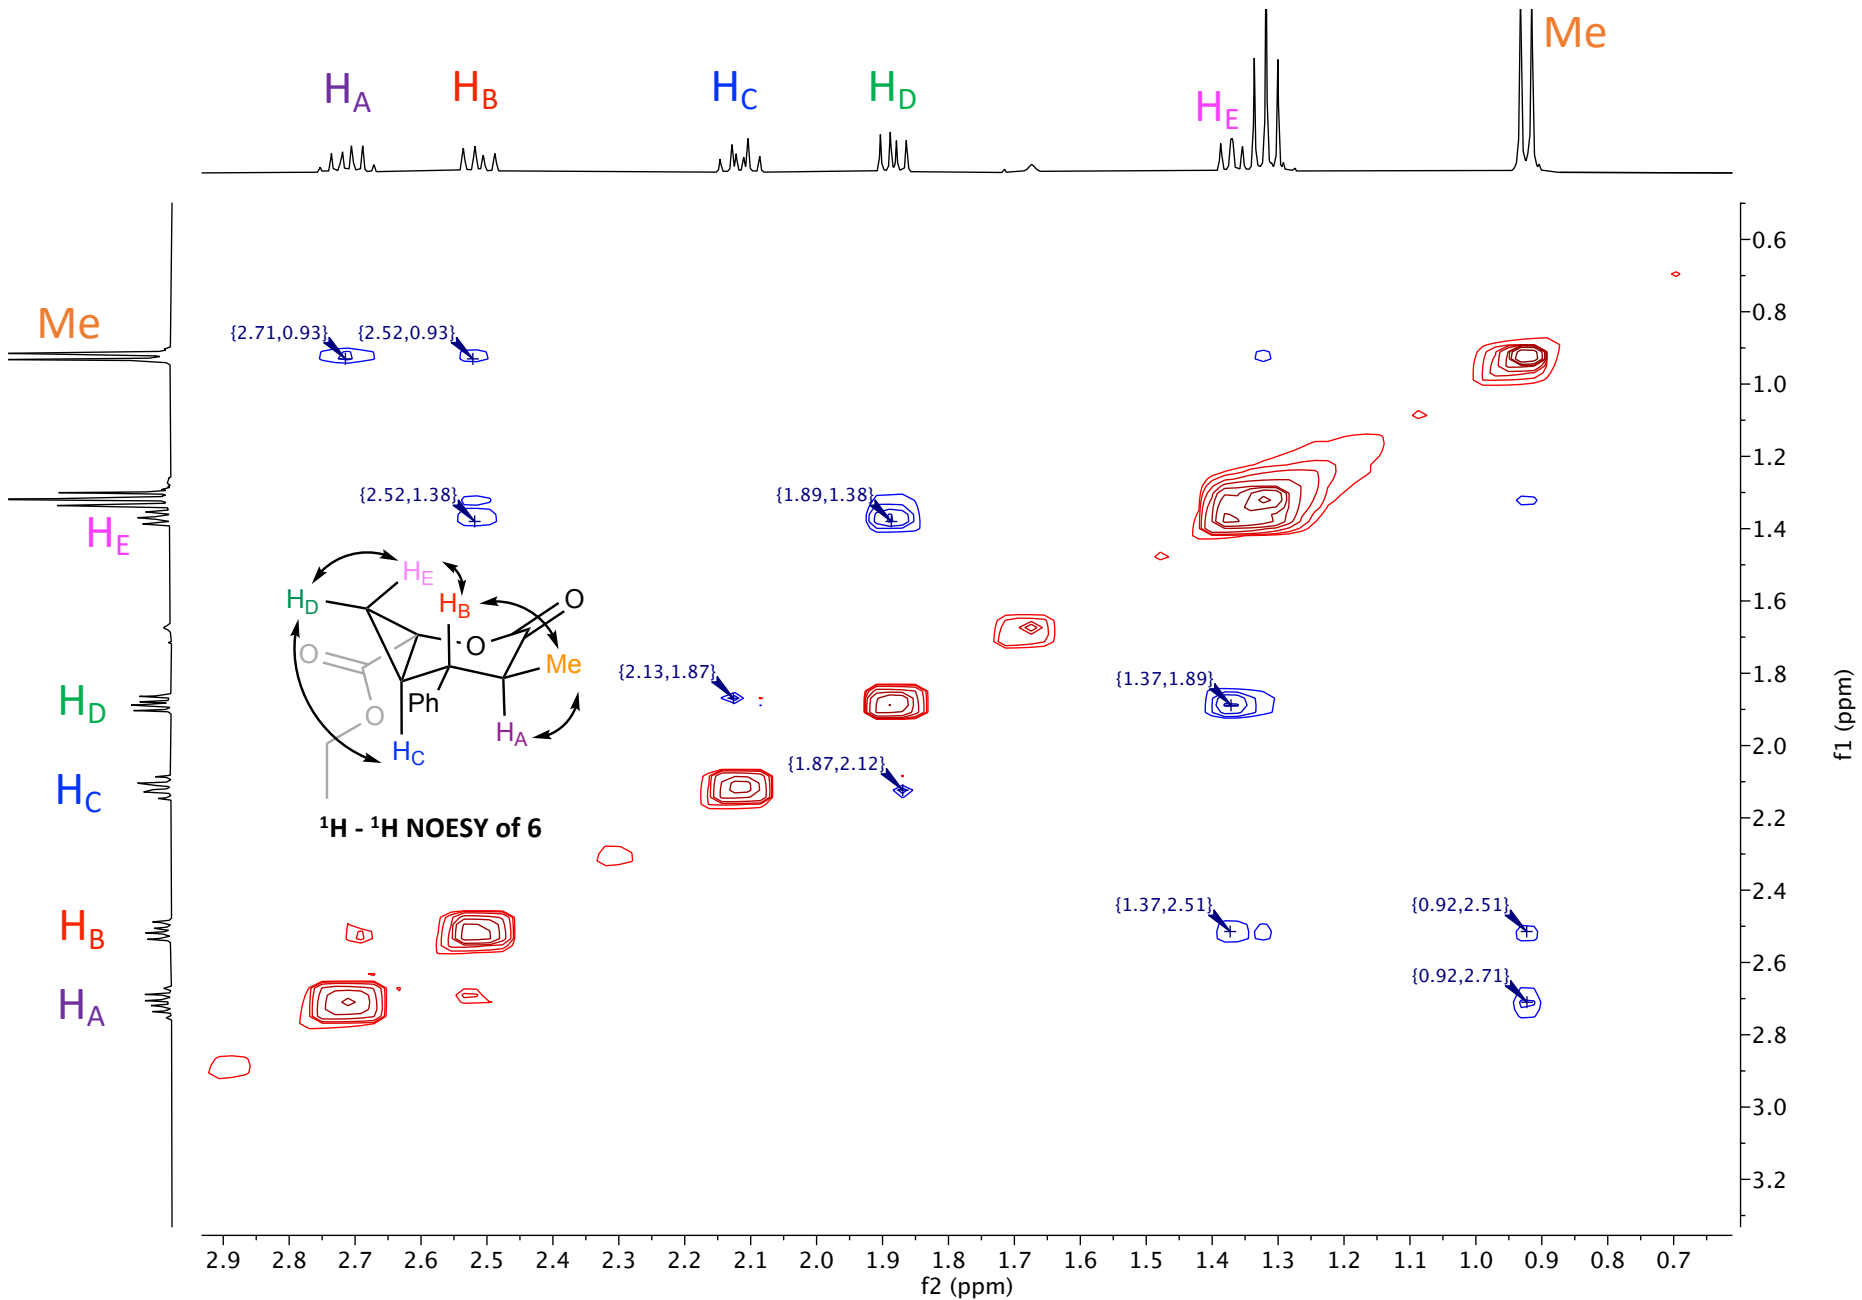

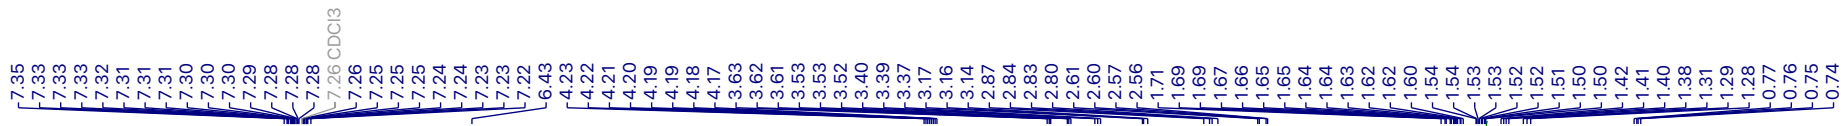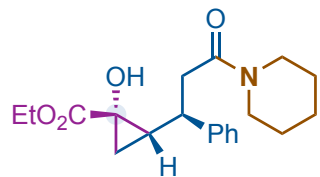

<sup>1</sup>H NMR of 7 (400 MHz, CDCl<sub>3</sub>)

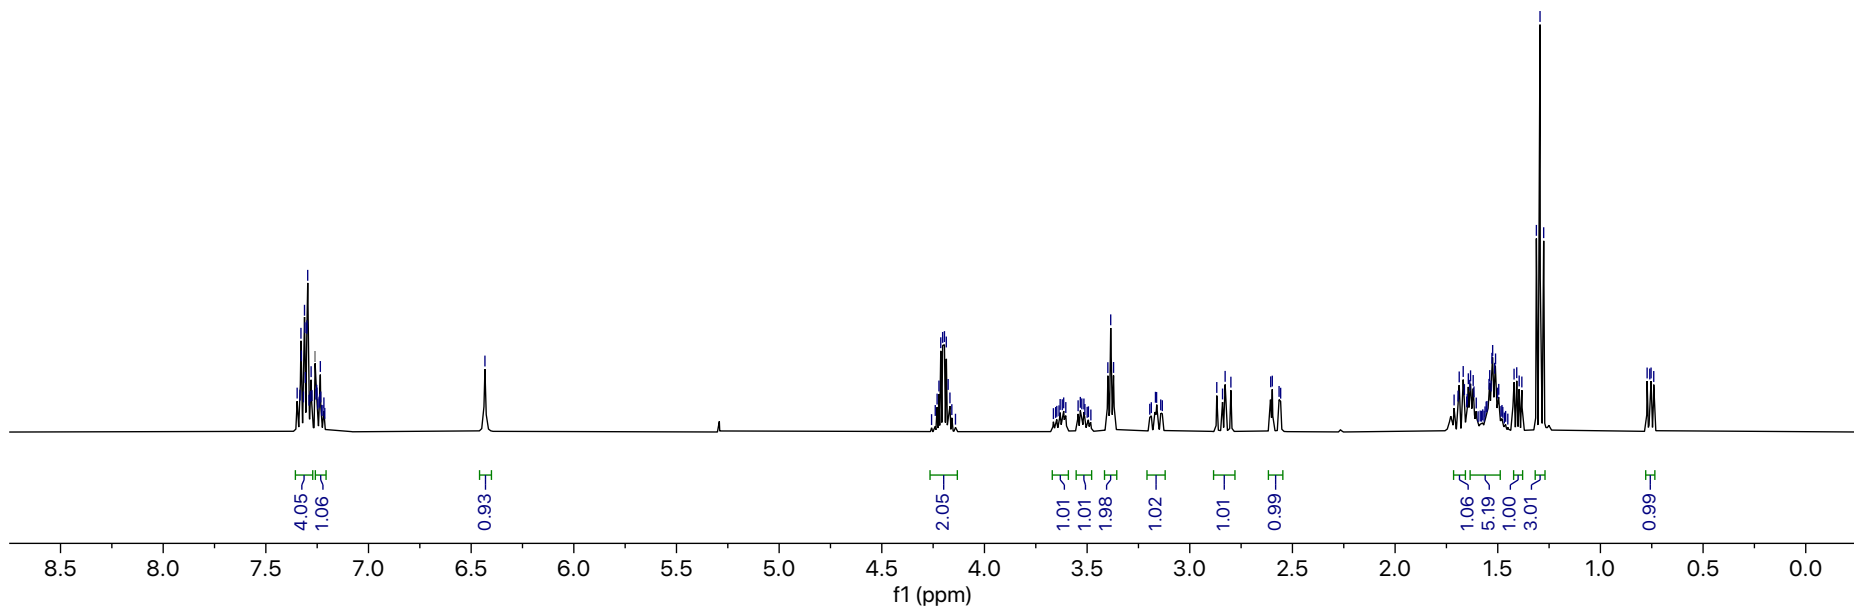

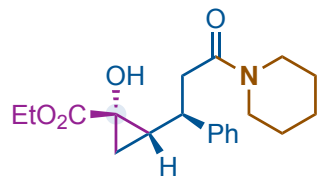

<sup>13</sup>C NMR of 7 (101 MHz, CDCl<sub>3</sub>)

—175.18  
—170.43

—144.87

—128.70  
—127.53  
—126.60

—61.07  
—57.54

—46.85  
—43.26  
—41.62  
—38.79

—33.42  
—26.47  
—25.54  
—24.41  
—22.24

—14.36

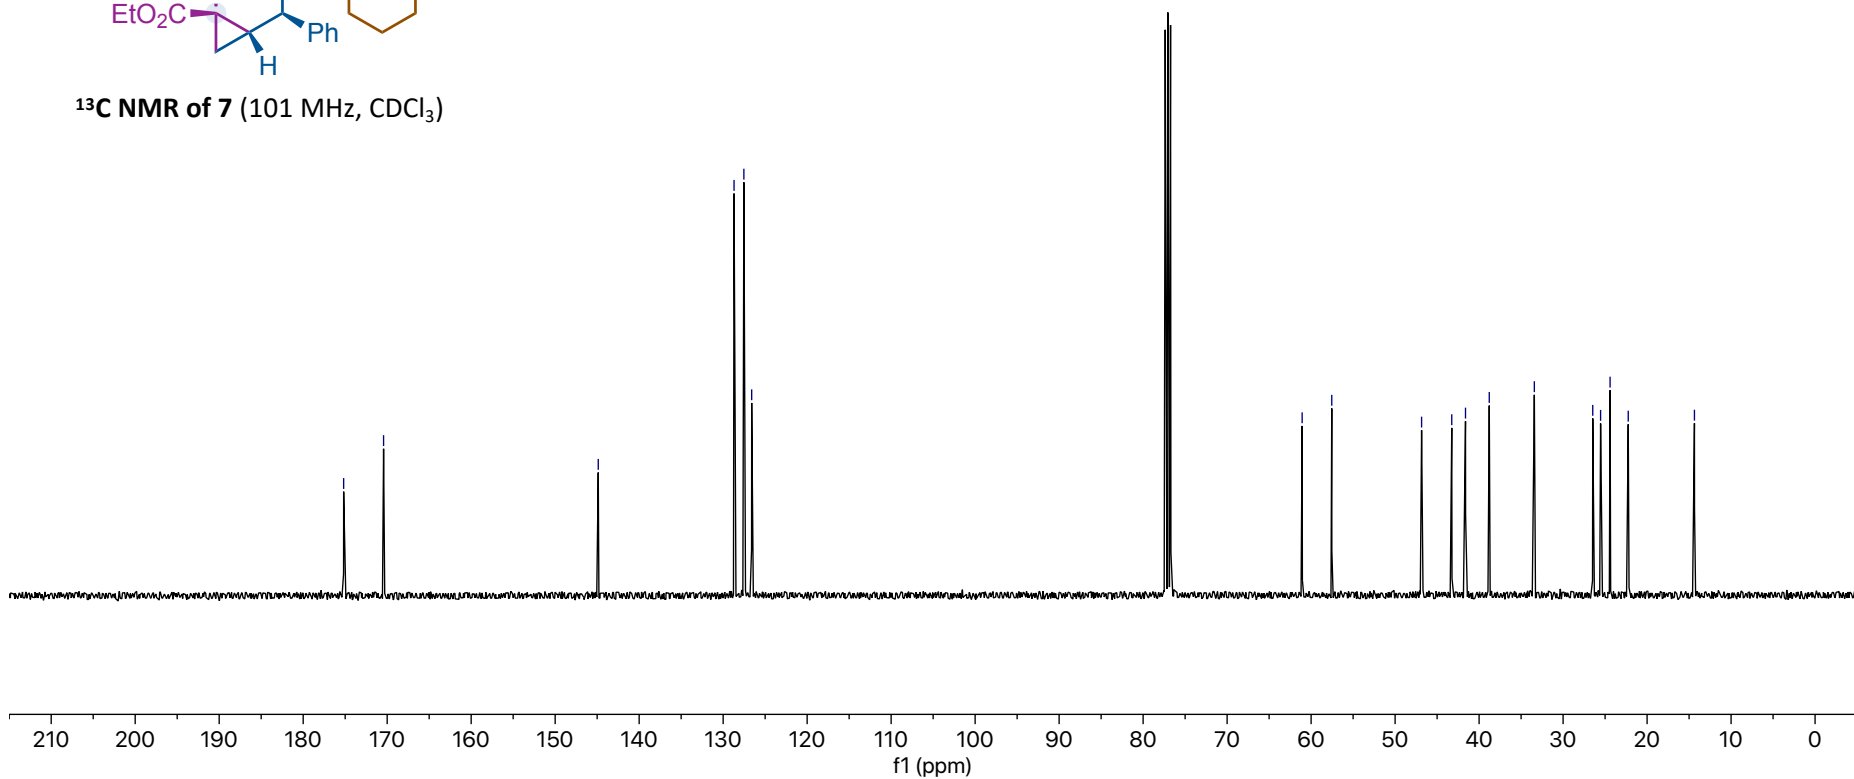

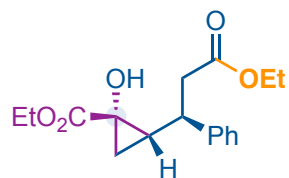

<sup>1</sup>H NMR of **8** (400 MHz, CDCl<sub>3</sub>)

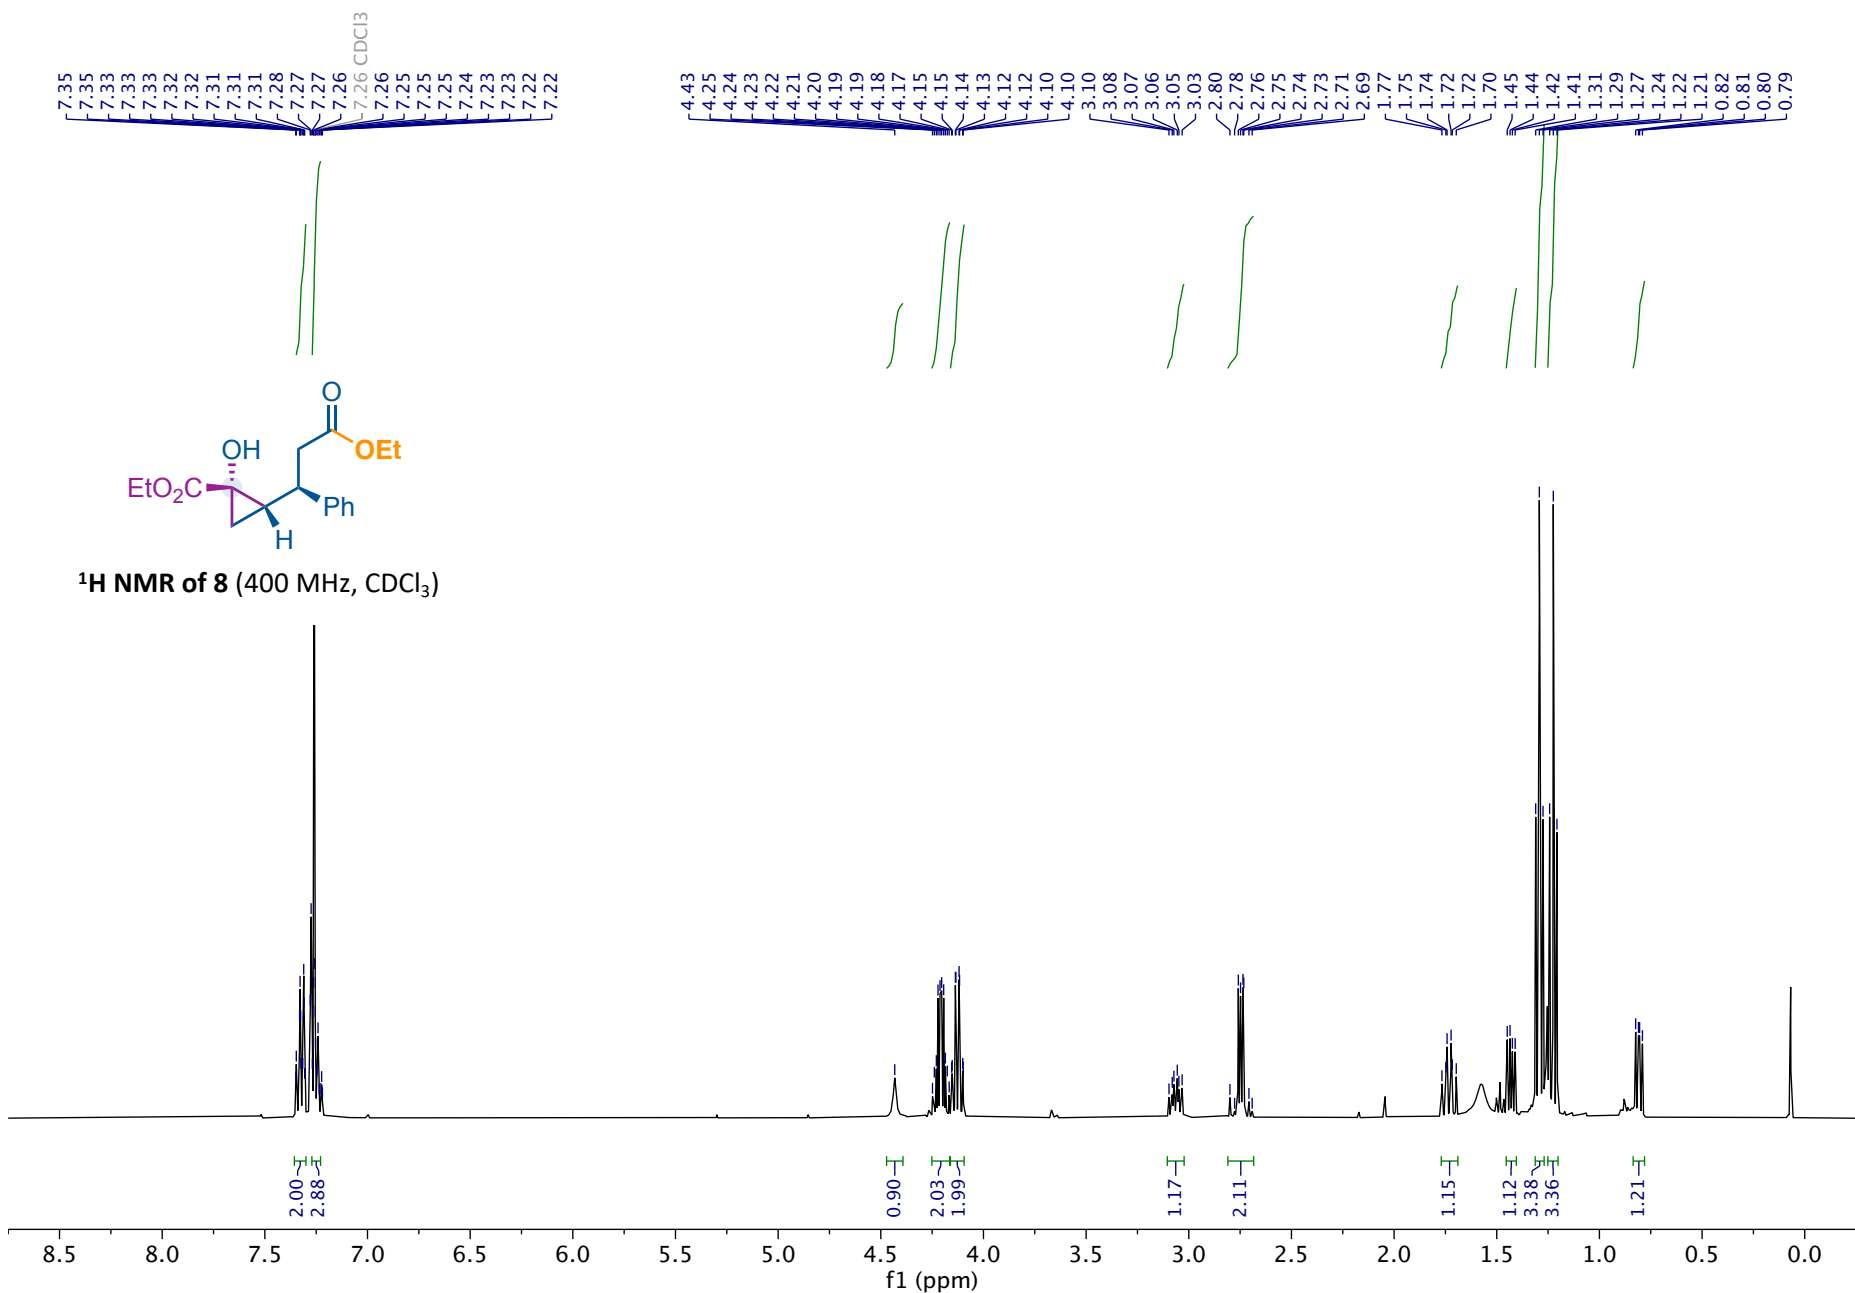

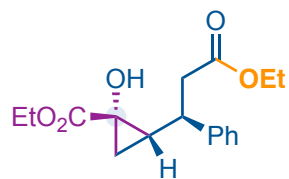

<sup>13</sup>C NMR of 8 (101 MHz, CDCl<sub>3</sub>)

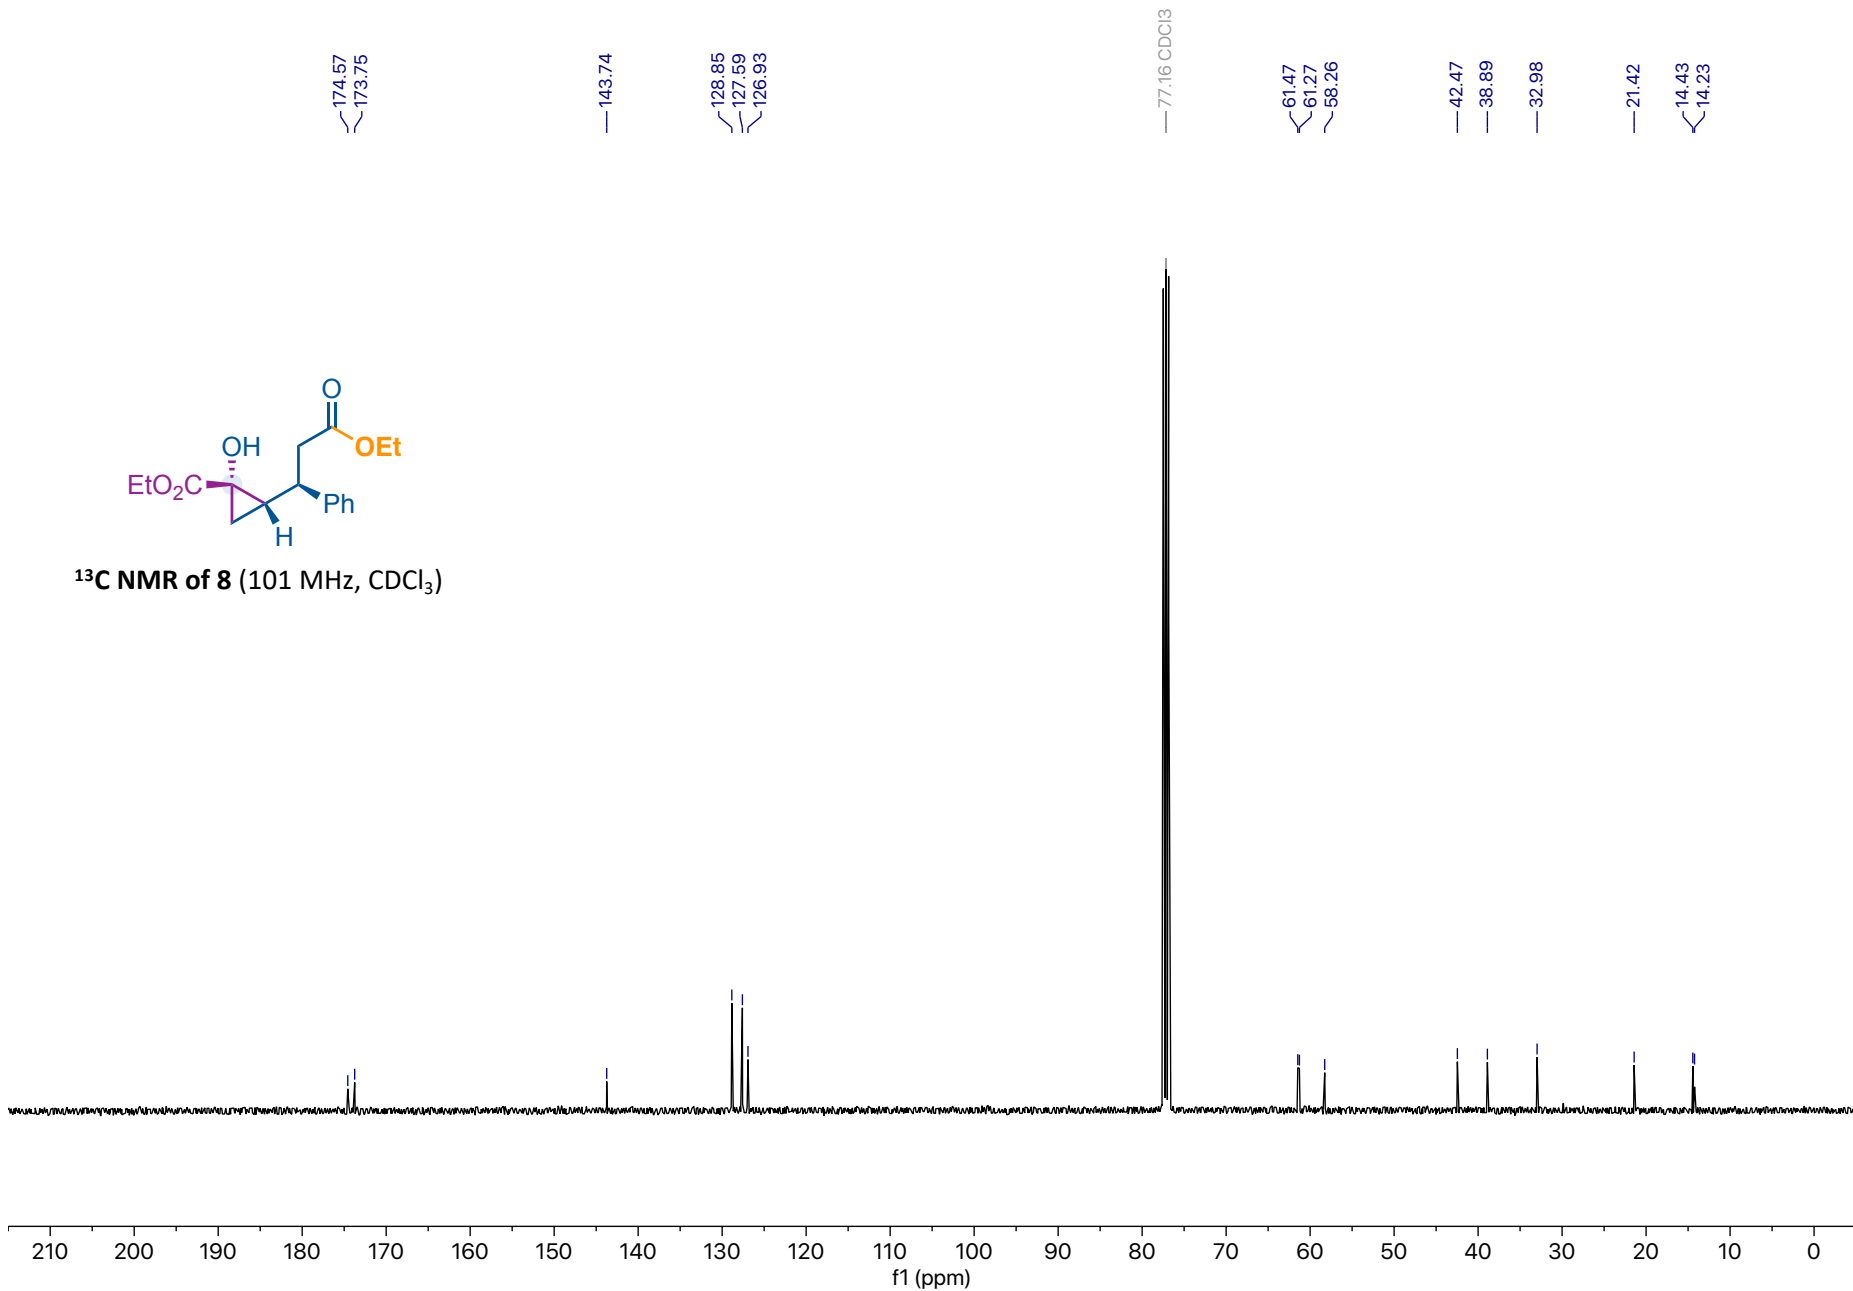

Supplement: ja3c00012_si_001.pdf [file ja3c00012_si_001.pdf]
